# Supplementary material
Source: Research Square preprint supplement (doi:10.21203/rs.3.rs-9931357/v1)
Supplement: Supplementary file 2 [file b21cda7416920fcbe67c849d.docx]

data_shelx

_audit_creation_method 'SHELXL-2016/6'

_shelx_SHELXL_version_number '2016/6'

_chemical_name_systematic ?

_chemical_name_common ?

_chemical_melting_point ?

_chemical_formula_moiety ?

_chemical_formula_sum

'Al0.01 Ca0.01 Cr0.92 Fe1.31 Mg0.03 Mn0.02 Ni0.03 O4 Si0.08 Ti0.02 Zn0.01'

_chemical_formula_weight 193.12

loop_

_atom_type_symbol

_atom_type_description

_atom_type_scat_dispersion_real

_atom_type_scat_dispersion_imag

_atom_type_scat_source

'O' 'O' 0.0106 0.0060

'International Tables Vol C Tables 4.2.6.8 and 6.1.1.4'

'Mg' 'Mg' 0.0486 0.0363

'International Tables Vol C Tables 4.2.6.8 and 6.1.1.4'

'Al' 'Al' 0.0645 0.0514

'International Tables Vol C Tables 4.2.6.8 and 6.1.1.4'

'Si' 'Si' 0.0817 0.0704

'International Tables Vol C Tables 4.2.6.8 and 6.1.1.4'

'Ti' 'Ti' 0.2776 0.4457

'International Tables Vol C Tables 4.2.6.8 and 6.1.1.4'

'Cr' 'Cr' 0.3209 0.6236

'International Tables Vol C Tables 4.2.6.8 and 6.1.1.4'

'Mn' 'Mn' 0.3368 0.7283

'International Tables Vol C Tables 4.2.6.8 and 6.1.1.4'

'Fe' 'Fe' 0.3463 0.8444

'International Tables Vol C Tables 4.2.6.8 and 6.1.1.4'

'Ni' 'Ni' 0.3393 1.1124

'International Tables Vol C Tables 4.2.6.8 and 6.1.1.4'

'Zn' 'Zn' 0.2839 1.4301

'International Tables Vol C Tables 4.2.6.8 and 6.1.1.4'

'Ca' 'Ca' 0.2262 0.3064

'International Tables Vol C Tables 4.2.6.8 and 6.1.1.4'

_space_group_crystal_system cubic

_space_group_IT_number 227

_space_group_name_H-M_alt 'F d -3 m'

_space_group_name_Hall '-F 4vw 2vw 3'

_shelx_space_group_comment

;

The symmetry employed for this shelxl refinement is uniquely defined

by the following loop, which should always be used as a source of

symmetry information in preference to the above space-group names.

They are only intended as comments.

;

loop_

_space_group_symop_operation_xyz

'x, y, z'

'-x+1/4, -y+1/4, z'

'x, -y+1/4, -z+1/4'

'-x+1/4, y, -z+1/4'

'z, x, y'

'y, z, x'

'-z+1/4, -x+1/4, y'

'-y+1/4, z, -x+1/4'

'z, -x+1/4, -y+1/4'

'-y+1/4, -z+1/4, x'

'-z+1/4, x, -y+1/4'

'y, -z+1/4, -x+1/4'

'-y, -x, -z'

'y+1/4, x+1/4, -z'

'y+1/4, -x, z+1/4'

'-y, x+1/4, z+1/4'

'-x, -z, -y'

'-z, -y, -x'

'x+1/4, z+1/4, -y'

'-z, y+1/4, x+1/4'

'x+1/4, -z, y+1/4'

'z+1/4, y+1/4, -x'

'-x, z+1/4, y+1/4'

'z+1/4, -y, x+1/4'

'x, y+1/2, z+1/2'

'-x+1/4, -y+3/4, z+1/2'

'x, -y+3/4, -z+3/4'

'-x+1/4, y+1/2, -z+3/4'

'z, x+1/2, y+1/2'

'y, z+1/2, x+1/2'

'-z+1/4, -x+3/4, y+1/2'

'-y+1/4, z+1/2, -x+3/4'

'z, -x+3/4, -y+3/4'

'-y+1/4, -z+3/4, x+1/2'

'-z+1/4, x+1/2, -y+3/4'

'y, -z+3/4, -x+3/4'

'-y, -x+1/2, -z+1/2'

'y+1/4, x+3/4, -z+1/2'

'y+1/4, -x+1/2, z+3/4'

'-y, x+3/4, z+3/4'

'-x, -z+1/2, -y+1/2'

'-z, -y+1/2, -x+1/2'

'x+1/4, z+3/4, -y+1/2'

'-z, y+3/4, x+3/4'

'x+1/4, -z+1/2, y+3/4'

'z+1/4, y+3/4, -x+1/2'

'-x, z+3/4, y+3/4'

'z+1/4, -y+1/2, x+3/4'

'x+1/2, y, z+1/2'

'-x+3/4, -y+1/4, z+1/2'

'x+1/2, -y+1/4, -z+3/4'

'-x+3/4, y, -z+3/4'

'z+1/2, x, y+1/2'

'y+1/2, z, x+1/2'

'-z+3/4, -x+1/4, y+1/2'

'-y+3/4, z, -x+3/4'

'z+1/2, -x+1/4, -y+3/4'

'-y+3/4, -z+1/4, x+1/2'

'-z+3/4, x, -y+3/4'

'y+1/2, -z+1/4, -x+3/4'

'-y+1/2, -x, -z+1/2'

'y+3/4, x+1/4, -z+1/2'

'y+3/4, -x, z+3/4'

'-y+1/2, x+1/4, z+3/4'

'-x+1/2, -z, -y+1/2'

'-z+1/2, -y, -x+1/2'

'x+3/4, z+1/4, -y+1/2'

'-z+1/2, y+1/4, x+3/4'

'x+3/4, -z, y+3/4'

'z+3/4, y+1/4, -x+1/2'

'-x+1/2, z+1/4, y+3/4'

'z+3/4, -y, x+3/4'

'x+1/2, y+1/2, z'

'-x+3/4, -y+3/4, z'

'x+1/2, -y+3/4, -z+1/4'

'-x+3/4, y+1/2, -z+1/4'

'z+1/2, x+1/2, y'

'y+1/2, z+1/2, x'

'-z+3/4, -x+3/4, y'

'-y+3/4, z+1/2, -x+1/4'

'z+1/2, -x+3/4, -y+1/4'

'-y+3/4, -z+3/4, x'

'-z+3/4, x+1/2, -y+1/4'

'y+1/2, -z+3/4, -x+1/4'

'-y+1/2, -x+1/2, -z'

'y+3/4, x+3/4, -z'

'y+3/4, -x+1/2, z+1/4'

'-y+1/2, x+3/4, z+1/4'

'-x+1/2, -z+1/2, -y'

'-z+1/2, -y+1/2, -x'

'x+3/4, z+3/4, -y'

'-z+1/2, y+3/4, x+1/4'

'x+3/4, -z+1/2, y+1/4'

'z+3/4, y+3/4, -x'

'-x+1/2, z+3/4, y+1/4'

'z+3/4, -y+1/2, x+1/4'

'-x, -y, -z'

'x-1/4, y-1/4, -z'

'-x, y-1/4, z-1/4'

'x-1/4, -y, z-1/4'

'-z, -x, -y'

'-y, -z, -x'

'z-1/4, x-1/4, -y'

'y-1/4, -z, x-1/4'

'-z, x-1/4, y-1/4'

'y-1/4, z-1/4, -x'

'z-1/4, -x, y-1/4'

'-y, z-1/4, x-1/4'

'y, x, z'

'-y-1/4, -x-1/4, z'

'-y-1/4, x, -z-1/4'

'y, -x-1/4, -z-1/4'

'x, z, y'

'z, y, x'

'-x-1/4, -z-1/4, y'

'z, -y-1/4, -x-1/4'

'-x-1/4, z, -y-1/4'

'-z-1/4, -y-1/4, x'

'x, -z-1/4, -y-1/4'

'-z-1/4, y, -x-1/4'

'-x, -y+1/2, -z+1/2'

'x-1/4, y+1/4, -z+1/2'

'-x, y+1/4, z+1/4'

'x-1/4, -y+1/2, z+1/4'

'-z, -x+1/2, -y+1/2'

'-y, -z+1/2, -x+1/2'

'z-1/4, x+1/4, -y+1/2'

'y-1/4, -z+1/2, x+1/4'

'-z, x+1/4, y+1/4'

'y-1/4, z+1/4, -x+1/2'

'z-1/4, -x+1/2, y+1/4'

'-y, z+1/4, x+1/4'

'y, x+1/2, z+1/2'

'-y-1/4, -x+1/4, z+1/2'

'-y-1/4, x+1/2, -z+1/4'

'y, -x+1/4, -z+1/4'

'x, z+1/2, y+1/2'

'z, y+1/2, x+1/2'

'-x-1/4, -z+1/4, y+1/2'

'z, -y+1/4, -x+1/4'

'-x-1/4, z+1/2, -y+1/4'

'-z-1/4, -y+1/4, x+1/2'

'x, -z+1/4, -y+1/4'

'-z-1/4, y+1/2, -x+1/4'

'-x+1/2, -y, -z+1/2'

'x+1/4, y-1/4, -z+1/2'

'-x+1/2, y-1/4, z+1/4'

'x+1/4, -y, z+1/4'

'-z+1/2, -x, -y+1/2'

'-y+1/2, -z, -x+1/2'

'z+1/4, x-1/4, -y+1/2'

'y+1/4, -z, x+1/4'

'-z+1/2, x-1/4, y+1/4'

'y+1/4, z-1/4, -x+1/2'

'z+1/4, -x, y+1/4'

'-y+1/2, z-1/4, x+1/4'

'y+1/2, x, z+1/2'

'-y+1/4, -x-1/4, z+1/2'

'-y+1/4, x, -z+1/4'

'y+1/2, -x-1/4, -z+1/4'

'x+1/2, z, y+1/2'

'z+1/2, y, x+1/2'

'-x+1/4, -z-1/4, y+1/2'

'z+1/2, -y-1/4, -x+1/4'

'-x+1/4, z, -y+1/4'

'-z+1/4, -y-1/4, x+1/2'

'x+1/2, -z-1/4, -y+1/4'

'-z+1/4, y, -x+1/4'

'-x+1/2, -y+1/2, -z'

'x+1/4, y+1/4, -z'

'-x+1/2, y+1/4, z-1/4'

'x+1/4, -y+1/2, z-1/4'

'-z+1/2, -x+1/2, -y'

'-y+1/2, -z+1/2, -x'

'z+1/4, x+1/4, -y'

'y+1/4, -z+1/2, x-1/4'

'-z+1/2, x+1/4, y-1/4'

'y+1/4, z+1/4, -x'

'z+1/4, -x+1/2, y-1/4'

'-y+1/2, z+1/4, x-1/4'

'y+1/2, x+1/2, z'

'-y+1/4, -x+1/4, z'

'-y+1/4, x+1/2, -z-1/4'

'y+1/2, -x+1/4, -z-1/4'

'x+1/2, z+1/2, y'

'z+1/2, y+1/2, x'

'-x+1/4, -z+1/4, y'

'z+1/2, -y+1/4, -x-1/4'

'-x+1/4, z+1/2, -y-1/4'

'-z+1/4, -y+1/4, x'

'x+1/2, -z+1/4, -y-1/4'

'-z+1/4, y+1/2, -x-1/4'

_cell_length_a 8.34222(6)

_cell_length_b 8.34222(6)

_cell_length_c 8.34222(6)

_cell_angle_alpha 90

_cell_angle_beta 90

_cell_angle_gamma 90

_cell_volume 580.556(13)

_cell_formula_units_Z 8

_cell_measurement_temperature 293(2)

_cell_measurement_reflns_used 8908

_cell_measurement_theta_min 4.2050

_cell_measurement_theta_max 64.7090

_exptl_crystal_description block

_exptl_crystal_colour black

_exptl_crystal_density_meas ?

_exptl_crystal_density_method ?

_exptl_crystal_density_diffrn 4.419

_exptl_crystal_F_000 736

_exptl_transmission_factor_min ?

_exptl_transmission_factor_max ?

_exptl_crystal_size_max 0.059

_exptl_crystal_size_mid 0.045

_exptl_crystal_size_min 0.041

_shelx_estimated_absorpt_T_min ?

_shelx_estimated_absorpt_T_max ?

_exptl_absorpt_coefficient_mu 10.188

_exptl_absorpt_correction_T_min 0.665

_exptl_absorpt_correction_T_max 0.782

_exptl_absorpt_correction_type gaussian

_exptl_absorpt_process_details

;

CrysAlisPro 1.171.43.76a (Rigaku Oxford Diffraction, 2023)

Numerical absorption correction based on gaussian integration over

a multifaceted crystal model

Empirical absorption correction using spherical harmonics,

implemented in SCALE3 ABSPACK scaling algorithm.

;

_oxdiff_exptl_absorpt_empirical_full_min 0.827

_oxdiff_exptl_absorpt_empirical_full_max 1.297

_oxdiff_exptl_absorpt_empirical_details

;

Empirical correction (ABSPACK) includes:

- Absorption correction using spherical harmonics

- Frame scaling

;

_diffrn_ambient_temperature 293(2)

_diffrn_radiation_wavelength 0.71073

_diffrn_radiation_type MoK\a

_diffrn_source 'micro-focus sealed X-ray tube'

_diffrn_source_type 'PhotonJet (Mo) X-ray Source'

_diffrn_measurement_device 'four-circle diffractometer'

_diffrn_measurement_device_type 'XtaLAB Synergy, Dualflex, HyPix'

_diffrn_detector 'Hybrid Pixel Array Detector'

_diffrn_detector_type HyPix

_diffrn_detector_area_resol_mean 10.0000

_diffrn_reflns_number 13568

_diffrn_reflns_av_unetI/netI 0.0068

_diffrn_reflns_av_R_equivalents 0.0318

_diffrn_reflns_limit_h_min -21

_diffrn_reflns_limit_h_max 21

_diffrn_reflns_limit_k_min -14

_diffrn_reflns_limit_k_max 21

_diffrn_reflns_limit_l_min -20

_diffrn_reflns_limit_l_max 21

_diffrn_reflns_theta_min 4.231

_diffrn_reflns_theta_max 64.912

_diffrn_reflns_theta_full 25.242

_diffrn_measured_fraction_theta_max 1.000

_diffrn_measured_fraction_theta_full 1.000

_diffrn_reflns_Laue_measured_fraction_max 1.000

_diffrn_reflns_Laue_measured_fraction_full 1.000

_diffrn_reflns_point_group_measured_fraction_max 1.000

_diffrn_reflns_point_group_measured_fraction_full 1.000

_reflns_number_total 279

_reflns_number_gt 269

_reflns_threshold_expression 'I > 2\s(I)'

_reflns_Friedel_coverage 0.000

_reflns_Friedel_fraction_max .

_reflns_Friedel_fraction_full .

_reflns_special_details

;

Reflections were merged by SHELXL according to the crystal

class for the calculation of statistics and refinement.

_reflns_Friedel_fraction is defined as the number of unique

Friedel pairs measured divided by the number that would be

possible theoretically, ignoring centric projections and

systematic absences.

;

_computing_data_collection 'CrysAlisPro system (CCD 40.84a 64-bit (release 31-07-2020))'

_computing_cell_refinement 'CrysAlisPro 1.171.43.76a (Rigaku OD, 2023)'

_computing_data_reduction 'CrysAlisPro 1.171.43.76a (Rigaku OD, 2023)'

_computing_structure_solution ?

_computing_structure_refinement 'SHELXL-2016/6 (Sheldrick, 2016)'

_computing_molecular_graphics ?

_computing_publication_material ?

_refine_special_details ?

_refine_ls_structure_factor_coef Fsqd

_refine_ls_matrix_type full

_refine_ls_weighting_scheme calc

_refine_ls_weighting_details

'w=1/[\s^2^(Fo^2^)+(0.0327P)^2^+1.1448P] where P=(Fo^2^+2Fc^2^)/3'

_atom_sites_solution_primary ?

_atom_sites_solution_secondary ?

_atom_sites_solution_hydrogens .

_refine_ls_hydrogen_treatment undef

_refine_ls_extinction_method 'SHELXL-2016/6 (Sheldrick 2016)'

_refine_ls_extinction_coef 0.0032(7)

_refine_ls_extinction_expression

'Fc^*^=kFc[1+0.001xFc^2^\l^3^/sin(2\q)]^-1/4^'

_refine_ls_number_reflns 279

_refine_ls_number_parameters 10

_refine_ls_number_restraints 0

_refine_ls_R_factor_all 0.0218

_refine_ls_R_factor_gt 0.0214

_refine_ls_wR_factor_ref 0.0577

_refine_ls_wR_factor_gt 0.0576

_refine_ls_goodness_of_fit_ref 1.149

_refine_ls_restrained_S_all 1.149

_refine_ls_shift/su_max 0.000

_refine_ls_shift/su_mean 0.000

loop_

_atom_site_label

_atom_site_type_symbol

_atom_site_fract_x

_atom_site_fract_y

_atom_site_fract_z

_atom_site_U_iso_or_equiv

_atom_site_adp_type

_atom_site_occupancy

_atom_site_site_symmetry_order

_atom_site_calc_flag

_atom_site_refinement_flags_posn

_atom_site_refinement_flags_adp

_atom_site_refinement_flags_occupancy

_atom_site_disorder_assembly

_atom_site_disorder_group

Si1 Si 0.125000 0.125000 0.125000 0.00875(7) Uani 0.0797 24 d S T P . .

Zn1 Zn 0.125000 0.125000 0.125000 0.00875(7) Uani 0.0077 24 d S T P . .

Mg1 Mg 0.125000 0.125000 0.125000 0.00875(7) Uani 0.0336 24 d S T P . .

Mn1 Mn 0.125000 0.125000 0.125000 0.00875(7) Uani 0.0223 24 d S T P . .

Fe1 Fe 0.125000 0.125000 0.125000 0.00875(7) Uani 0.6519 24 d S T P . .

Cr2 Cr 0.500000 0.500000 0.500000 0.00535(6) Uani 0.4598 12 d S T P . .

Al2 Al 0.500000 0.500000 0.500000 0.00535(6) Uani 0.0059 12 d S T P . .

Ti2 Ti 0.500000 0.500000 0.500000 0.00535(6) Uani 0.0103 12 d S T P . .

Ni2 Ni 0.500000 0.500000 0.500000 0.00535(6) Uani 0.0173 12 d S T P . .

Ca2 Ca 0.500000 0.500000 0.500000 0.00535(6) Uani 0.0059 12 d S T P . .

Fe2 Fe 0.500000 0.500000 0.500000 0.00535(6) Uani 0.3259 12 d S T P . .

O O 0.26224(6) 0.26224(6) 0.26224(6) 0.00828(10) Uani 1 6 d S T P . .

loop_

_atom_site_aniso_label

_atom_site_aniso_U_11

_atom_site_aniso_U_22

_atom_site_aniso_U_33

_atom_site_aniso_U_23

_atom_site_aniso_U_13

_atom_site_aniso_U_12

Si1 0.00875(7) 0.00875(7) 0.00875(7) 0.000 0.000 0.000

Zn1 0.00875(7) 0.00875(7) 0.00875(7) 0.000 0.000 0.000

Mg1 0.00875(7) 0.00875(7) 0.00875(7) 0.000 0.000 0.000

Mn1 0.00875(7) 0.00875(7) 0.00875(7) 0.000 0.000 0.000

Fe1 0.00875(7) 0.00875(7) 0.00875(7) 0.000 0.000 0.000

Cr2 0.00535(6) 0.00535(6) 0.00535(6) -0.00018(2) -0.00018(2) -0.00018(2)

Al2 0.00535(6) 0.00535(6) 0.00535(6) -0.00018(2) -0.00018(2) -0.00018(2)

Ti2 0.00535(6) 0.00535(6) 0.00535(6) -0.00018(2) -0.00018(2) -0.00018(2)

Ni2 0.00535(6) 0.00535(6) 0.00535(6) -0.00018(2) -0.00018(2) -0.00018(2)

Ca2 0.00535(6) 0.00535(6) 0.00535(6) -0.00018(2) -0.00018(2) -0.00018(2)

Fe2 0.00535(6) 0.00535(6) 0.00535(6) -0.00018(2) -0.00018(2) -0.00018(2)

O 0.00828(10) 0.00828(10) 0.00828(10) -0.00050(10) -0.00050(10) -0.00050(10)

_geom_special_details

;

All esds (except the esd in the dihedral angle between two l.s. planes)

are estimated using the full covariance matrix. The cell esds are taken

into account individually in the estimation of esds in distances, angles

and torsion angles; correlations between esds in cell parameters are only

used when they are defined by crystal symmetry. An approximate (isotropic)

treatment of cell esds is used for estimating esds involving l.s. planes.

;

loop_

_geom_bond_atom_site_label_1

_geom_bond_atom_site_label_2

_geom_bond_distance

_geom_bond_site_symmetry_2

_geom_bond_publ_flag

Si1 O 1.9829(9) 4 ?

Si1 O 1.9829(9) 2 ?

Si1 O 1.9829(9) 3 ?

Si1 O 1.9830(9) . ?

Cr2 O 1.9887(5) 123_655 ?

Cr2 O 1.9887(5) 27 ?

Cr2 O 1.9887(5) 148_565 ?

Cr2 O 1.9887(5) 52 ?

Cr2 O 1.9887(5) 170_556 ?

Cr2 O 1.9887(5) 74 ?

Cr2 Cr2 2.949419(19) 3_566 ?

Cr2 Cr2 2.94942(2) 52 ?

Cr2 Cr2 2.949419(19) 4_656 ?

Cr2 Cr2 2.94942(2) 74 ?

Cr2 Cr2 2.949419(19) 2_665 ?

Cr2 Cr2 2.949419(19) 27 ?

loop_

_geom_angle_atom_site_label_1

_geom_angle_atom_site_label_2

_geom_angle_atom_site_label_3

_geom_angle

_geom_angle_site_symmetry_1

_geom_angle_site_symmetry_3

_geom_angle_publ_flag

O Si1 O 109.5 4 2 ?

O Si1 O 109.5 4 3 ?

O Si1 O 109.5 2 3 ?

O Si1 O 109.5 4 . ?

O Si1 O 109.5 2 . ?

O Si1 O 109.471(1) 3 . ?

O Cr2 O 180.0 123_655 27 ?

O Cr2 O 83.97(3) 123_655 148_565 ?

O Cr2 O 96.03(3) 27 148_565 ?

O Cr2 O 96.03(3) 123_655 52 ?

O Cr2 O 83.97(3) 27 52 ?

O Cr2 O 180.0 148_565 52 ?

O Cr2 O 83.97(3) 123_655 170_556 ?

O Cr2 O 96.03(3) 27 170_556 ?

O Cr2 O 83.97(3) 148_565 170_556 ?

O Cr2 O 96.03(3) 52 170_556 ?

O Cr2 O 96.03(3) 123_655 74 ?

O Cr2 O 83.97(3) 27 74 ?

O Cr2 O 96.03(3) 148_565 74 ?

O Cr2 O 83.97(3) 52 74 ?

O Cr2 O 180.0 170_556 74 ?

O Cr2 Cr2 85.84(2) 123_655 3_566 ?

O Cr2 Cr2 94.16(2) 27 3_566 ?

O Cr2 Cr2 42.138(15) 148_565 3_566 ?

O Cr2 Cr2 137.862(15) 52 3_566 ?

O Cr2 Cr2 42.138(15) 170_556 3_566 ?

O Cr2 Cr2 137.862(15) 74 3_566 ?

O Cr2 Cr2 137.862(15) 123_655 52 ?

O Cr2 Cr2 42.138(15) 27 52 ?

O Cr2 Cr2 94.16(2) 148_565 52 ?

O Cr2 Cr2 85.84(2) 52 52 ?

O Cr2 Cr2 137.862(15) 170_556 52 ?

O Cr2 Cr2 42.138(15) 74 52 ?

Cr2 Cr2 Cr2 120.0 3_566 52 ?

O Cr2 Cr2 42.138(15) 123_655 4_656 ?

O Cr2 Cr2 137.862(15) 27 4_656 ?

O Cr2 Cr2 85.84(2) 148_565 4_656 ?

O Cr2 Cr2 94.16(2) 52 4_656 ?

O Cr2 Cr2 42.138(15) 170_556 4_656 ?

O Cr2 Cr2 137.862(15) 74 4_656 ?

Cr2 Cr2 Cr2 60.0 3_566 4_656 ?

Cr2 Cr2 Cr2 180.0 52 4_656 ?

O Cr2 Cr2 137.862(15) 123_655 74 ?

O Cr2 Cr2 42.138(15) 27 74 ?

O Cr2 Cr2 137.862(15) 148_565 74 ?

O Cr2 Cr2 42.138(15) 52 74 ?

O Cr2 Cr2 94.16(2) 170_556 74 ?

O Cr2 Cr2 85.84(2) 74 74 ?

Cr2 Cr2 Cr2 120.0 3_566 74 ?

Cr2 Cr2 Cr2 60.0 52 74 ?

Cr2 Cr2 Cr2 120.0 4_656 74 ?

O Cr2 Cr2 42.138(15) 123_655 2_665 ?

O Cr2 Cr2 137.862(15) 27 2_665 ?

O Cr2 Cr2 42.138(15) 148_565 2_665 ?

O Cr2 Cr2 137.862(15) 52 2_665 ?

O Cr2 Cr2 85.84(2) 170_556 2_665 ?

O Cr2 Cr2 94.16(2) 74 2_665 ?

Cr2 Cr2 Cr2 60.0 3_566 2_665 ?

Cr2 Cr2 Cr2 120.0 52 2_665 ?

Cr2 Cr2 Cr2 60.0 4_656 2_665 ?

Cr2 Cr2 Cr2 180.0 74 2_665 ?

O Cr2 Cr2 94.16(2) 123_655 27 ?

O Cr2 Cr2 85.84(2) 27 27 ?

O Cr2 Cr2 137.862(15) 148_565 27 ?

O Cr2 Cr2 42.138(15) 52 27 ?

O Cr2 Cr2 137.862(15) 170_556 27 ?

O Cr2 Cr2 42.138(15) 74 27 ?

Cr2 Cr2 Cr2 180.0 3_566 27 ?

Cr2 Cr2 Cr2 60.0 52 27 ?

Cr2 Cr2 Cr2 120.0 4_656 27 ?

Cr2 Cr2 Cr2 60.0 74 27 ?

Cr2 Cr2 Cr2 120.0 2_665 27 ?

Si1 O Cr2 121.10(2) . 52 ?

Si1 O Cr2 121.10(2) . 74 ?

Cr2 O Cr2 95.73(3) 52 74 ?

Si1 O Cr2 121.10(2) . 27 ?

Cr2 O Cr2 95.73(3) 52 27 ?

Cr2 O Cr2 95.73(3) 74 27 ?

_refine_diff_density_max 1.446

_refine_diff_density_min -1.234

_refine_diff_density_rms 0.160

_shelx_res_file

;

TITL saikai_2022_001 in Fd-3m

shelx.res

created by SHELXL-2016/6 at 11:23:42 on 04-Dec-2023

REM Fd-3m (#227 in standard setting)

CELL 0.71073 8.342217 8.342217 8.342217 90.0000 90.0000 90.0000

ZERR 8.00 0.000063 0.000063 0.000063 0.0000 0.0000 0.0000

LATT 4

SYMM 0.25000-X, 0.25000-Y,Z

SYMM X, 0.25000-Y, 0.25000-Z

SYMM 0.25000-X,Y, 0.25000-Z

SYMM Z,X,Y

SYMM Y,Z,X

SYMM 0.25000-Z, 0.25000-X,Y

SYMM 0.25000-Y,Z, 0.25000-X

SYMM Z, 0.25000-X, 0.25000-Y

SYMM 0.25000-Y, 0.25000-Z,X

SYMM 0.25000-Z,X, 0.25000-Y

SYMM Y, 0.25000-Z, 0.25000-X

SYMM -Y,-X,-Z

SYMM 0.25000+Y, 0.25000+X,-Z

SYMM 0.25000+Y,-X, 0.25000+Z

SYMM -Y, 0.25000+X, 0.25000+Z

SYMM -X,-Z,-Y

SYMM -Z,-Y,-X

SYMM 0.25000+X, 0.25000+Z,-Y

SYMM -Z, 0.25000+Y, 0.25000+X

SYMM 0.25000+X,-Z, 0.25000+Y

SYMM 0.25000+Z, 0.25000+Y,-X

SYMM -X, 0.25000+Z, 0.25000+Y

SYMM 0.25000+Z,-Y, 0.25000+X

SFAC O Mg Al Si Ti Cr Mn Fe Ni Zn Ca

UNIT 32.00 0.24 0.08 0.64 0.16 7.36 0.16 10.48 0.24 0.08 0.08

EADP SI1 ZN1 MG1 MN1 FE1

EADP CR2 AL2 TI2 NI2 CA2 FE2

EXYZ SI1 ZN1 MG1 MN1 FE1

EXYZ CR2 AL2 TI2 NI2 CA2 FE2

REM SUMP 1.30 0.001 0.65 2 0.65 3

REM SUMP 0.05558 0.00001 0.02779 2 0.02779 3

L.S. 20

LIST 3

FMAP 2

PLAN 25

ACTA

WGHT 0.032700 1.144800

EXTI 0.003235

FVAR 0.44925 0.98444 1.01607

SI1 4 0.125000 0.125000 0.125000 10.00332 0.00875 0.00875 =

0.00875 0.00000 0.00000 0.00000

ZN1 10 0.125000 0.125000 0.125000 10.00032 0.00875 0.00875 =

0.00875 0.00000 0.00000 0.00000

MG1 2 0.125000 0.125000 0.125000 10.00140 0.00875 0.00875 =

0.00875 0.00000 0.00000 0.00000

MN1 7 0.125000 0.125000 0.125000 10.00093 0.00875 0.00875 =

0.00875 0.00000 0.00000 0.00000

FE1 8 0.125000 0.125000 0.125000 10.02716 0.00875 0.00875 =

0.00875 0.00000 0.00000 0.00000

CR2 6 0.500000 0.500000 0.500000 10.03832 0.00535 0.00535 =

0.00535 -0.00018 -0.00018 -0.00018

AL2 3 0.500000 0.500000 0.500000 10.00049 0.00535 0.00535 =

0.00535 -0.00018 -0.00018 -0.00018

TI2 5 0.500000 0.500000 0.500000 10.00086 0.00535 0.00535 =

0.00535 -0.00018 -0.00018 -0.00018

NI2 9 0.500000 0.500000 0.500000 10.00144 0.00535 0.00535 =

0.00535 -0.00018 -0.00018 -0.00018

CA2 11 0.500000 0.500000 0.500000 10.00049 0.00535 0.00535 =

0.00535 -0.00018 -0.00018 -0.00018

FE2 8 0.500000 0.500000 0.500000 10.02716 0.00535 0.00535 =

0.00535 -0.00018 -0.00018 -0.00018

O 1 0.262237 0.262237 0.262237 10.16667 0.00828 0.00828 =

0.00828 -0.00050 -0.00050 -0.00050

HKLF 4

REM saikai_2022_001 in Fd-3m

REM R1 = 0.0214 for 269 Fo > 4sig(Fo) and 0.0218 for all 279 data

REM 10 parameters refined using 0 restraints

END

WGHT 0.0323 1.1558

REM Highest difference peak 1.446, deepest hole -1.234, 1-sigma level 0.160

Q1 1 0.0000 0.0000 0.0000 10.08333 0.05 1.45

Q2 1 0.3750 0.3750 0.1156 10.25000 0.05 0.97

Q3 1 0.3750 0.3750 0.3356 10.25000 0.05 0.60

Q4 1 0.5372 0.4523 0.5372 10.50000 0.05 0.48

Q5 1 0.5000 0.4465 0.5535 10.50000 0.05 0.48

Q6 1 0.2095 0.2538 0.2095 10.50000 0.05 0.45

Q7 1 0.1814 0.2382 0.2382 10.50000 0.05 0.45

Q8 1 0.1250 0.1250 0.0566 10.25000 0.05 0.43

Q9 1 0.2270 0.2270 0.2270 10.16667 0.05 0.38

Q10 1 0.5396 0.5396 0.5396 10.16667 0.05 0.36

Q11 1 0.2483 0.3403 0.2483 10.50000 0.05 0.35

Q12 1 0.3750 0.3750 0.1776 10.25000 0.05 0.33

Q13 1 0.0922 0.0922 0.0922 10.16667 0.05 0.32

Q14 1 0.4973 0.5539 0.5539 10.50000 0.05 0.32

Q15 1 0.3633 0.1574 0.3318 11.00000 0.05 0.28

Q16 1 0.2053 0.2976 0.2352 11.00000 0.05 0.27

Q17 1 0.2195 0.3750 0.3750 10.25000 0.05 0.26

Q18 1 0.2500 0.2959 0.0459 10.50000 0.05 0.25

Q19 1 0.1154 0.3321 0.3321 10.50000 0.05 0.24

Q20 1 0.4886 0.4886 0.5826 10.50000 0.05 0.23

Q21 1 0.2140 0.2762 0.0360 10.50000 0.05 0.23

Q22 1 0.1667 0.3664 0.1667 10.50000 0.05 0.22

Q23 1 0.0676 0.0676 0.0676 10.16667 0.05 0.20

Q24 1 0.1250 0.1250 -0.0523 10.25000 0.05 0.19

Q25 1 0.2117 0.2981 0.2981 10.50000 0.05 0.18

;

_shelx_res_checksum 40575

_shelx_hkl_file

;

1 1 -1 1215.27 24.3282 4

-1 1 -1 1195.40 23.8652 2

1 -1 1 1204.64 23.6680 1

-1 -1 -1 1243.28 22.4254 2

-1 -1 -1 1218.16 23.6531 1

-1 -1 1 1200.44 24.1449 11

1 -1 -1 1187.30 24.0544 11

0 -2 0 0.37776 0.45944 2

0 0 -2 0.25253 0.89948 5

2 0 0 0.45857 1.13263 17

0 2 -2 3043.08 58.0946 5

0 -2 2 3063.15 58.0015 5

0 -2 -2 3212.80 58.1542 5

-2 0 -2 3129.85 58.2179 2

2 0 -2 3159.04 59.1195 4

0 -2 2 3121.01 57.4309 3

-2 0 -2 3204.61 59.0144 3

0 2 2 3023.98 57.9900 5

-2 2 0 3082.05 58.5932 17

-2 -2 0 3010.78 58.4986 17

2 0 -2 3107.01 60.2025 11

-2 2 2 1385.22 26.9492 4

2 -2 2 1359.48 28.4517 1

2 2 -2 1413.10 29.7726 4

2 2 2 1353.53 28.5137 1

-2 2 2 1368.74 29.3595 11

-2 -2 2 1373.25 29.3756 11

1 -3 1 7777.23 138.928 4

1 -3 1 7711.17 138.395 1

1 -1 -3 7766.87 141.192 5

-1 -1 -3 7697.14 141.118 1

-1 -1 3 7847.77 141.231 5

1 -1 3 7656.32 141.026 5

-1 1 -3 7726.17 140.843 2

1 -3 1 7766.66 140.093 2

1 3 -1 7785.69 139.156 2

-3 -1 -1 7861.56 140.109 3

1 1 -3 7621.28 138.522 3

1 -1 3 7903.44 140.318 3

1 3 -1 7775.88 138.383 5

1 3 1 7659.81 138.395 1

1 -3 -1 7698.60 138.384 5

3 1 -1 7644.58 138.142 3

3 -1 1 7707.07 141.759 17

1 -3 1 7453.39 138.521 17

-3 -1 -1 7702.77 141.666 17

1 3 1 7407.55 138.422 17

3 -1 -1 7602.01 142.236 11

-1 3 1 7429.91 138.779 11

-1 -3 1 7626.47 138.829 11

3 1 3 30.3595 2.38856 2

-1 3 -3 38.5411 2.88263 1

3 1 -3 33.6437 3.26376 4

-3 1 -3 30.2770 2.86113 3

1 -3 3 33.1794 2.59666 5

1 3 -3 34.2052 2.74401 5

-3 -3 1 34.2075 1.75900 3

-1 -3 -3 36.1458 2.81136 1

-1 -3 3 36.8545 3.27964 4

-3 1 3 29.7848 2.65661 4

1 -3 -3 37.8597 2.89501 5

1 -3 3 41.0023 2.82044 3

-3 -1 -3 34.8192 3.02728 3

1 3 3 33.9162 2.78144 5

-1 -3 3 36.9844 1.94358 3

-3 3 1 28.1834 2.81400 17

-3 -3 1 35.9666 3.09310 17

3 -3 1 37.9834 3.12953 17

3 3 1 30.6681 2.80499 17

3 3 -1 32.1187 3.01266 11

3 -3 -1 37.8049 3.27632 11

3 -3 3 2979.21 60.3793 1

3 3 -3 3012.58 62.3321 4

-3 3 3 3023.58 57.7981 4

3 -3 -3 3163.61 60.7928 5

3 -3 3 3040.15 60.5650 3

3 3 -3 3141.94 60.7668 5

3 3 3 3032.68 61.0284 17

3 -3 3 2995.51 60.8259 17

-3 -3 3 3048.46 61.7453 11

0 0 -4 13320.0 236.444 5

0 -4 0 13133.9 233.162 2

-4 -2 0 0.88565 1.57019 17

4 0 2 0.32130 1.40560 17

-2 -4 0 0.26703 0.84397 17

0 -2 -4 1.52651 1.20596 5

0 4 -2 0.42080 1.10261 2

-2 0 -4-0.21846 1.19570 2

-4 -2 0 0.74066 0.77645 3

0 -4 -2 0.48514 0.84275 1

0 -4 2 1.52270 0.74815 5

0 2 -4 3.33394 1.58659 5

-2 0 -4 0.28860 1.39304 1

4 0 -2-2.77015 1.43458 4

0 2 -4 0.49092 0.68432 3

0 -2 4-0.74195 1.31548 5

0 -4 2-0.22614 1.16698 4

2 0 -4 0.29037 1.37631 5

2 4 0 0.80694 0.54402 2

-4 0 -2-0.24290 1.10795 3

2 4 0 4.25294 1.25468 11

2 -4 0 0.58154 1.01010 11

4 -2 0 1.56987 1.59457 11

4 2 0-0.31434 1.64712 11

4 0 -2-0.35979 1.57394 11

2 4 -2 1632.08 33.5398 5

4 -2 -2 1695.39 33.4913 4

2 4 2 1670.03 33.5391 1

2 -4 2 1657.40 35.2431 2

4 2 2 1684.66 32.6937 2

2 -2 4 1663.20 35.1498 3

-2 -2 -4 1672.09 35.9008 1

2 -2 -4 1645.38 35.8788 5

-2 -2 -4 1672.22 33.2245 2

4 -2 2 1672.34 36.0713 1

2 -4 2 1647.78 33.5237 1

-2 2 -4 1743.49 35.9328 2

4 2 -2 1712.43 37.0665 4

-2 2 -4 1649.03 35.8396 1

2 2 -4 1654.46 36.0317 5

2 4 -2 1655.78 36.3826 4

-4 -2 -2 1684.38 35.0730 3

2 2 -4 1626.14 31.3187 3

2 -4 -2 1641.70 33.4550 5

-2 2 -4 1701.47 35.1743 3

4 -2 2 1620.18 36.4029 17

2 4 2 1626.35 33.6817 17

2 -4 2 1604.12 33.7712 17

4 2 2 1611.64 36.2958 17

-2 -2 4 1617.62 36.7106 11

-4 -2 2 1666.69 37.0787 11

4 -2 -2 1590.87 37.0570 11

-2 4 2 1639.21 34.3306 11

-2 -4 2 1691.07 34.3885 11

4 2 -2 1638.36 37.3159 11

-4 0 -4 24941.6 445.227 3

0 -4 4 24237.8 441.728 3

0 -4 4 23882.0 445.479 4

0 -4 -4 24081.5 443.311 1

-4 0 4 24578.3 445.409 4

0 -4 4 24560.6 443.066 5

0 4 -4 25546.8 445.046 2

0 4 -4 25616.2 443.582 1

-4 -4 0 23852.5 443.870 17

4 4 0 25033.3 444.805 11

4 2 4 22.5181 3.31774 17

4 -2 4 12.1643 2.74618 17

4 4 2 19.0110 2.76203 17

4 -4 2 22.2158 2.89307 17

4 -4 2 20.9415 2.74135 2

2 -4 4 16.6886 2.34913 5

4 -2 4 21.4653 2.79967 3

-2 -4 4 15.0626 2.86637 4

4 -2 4 19.3932 2.90962 1

4 2 -4 18.0745 3.03228 5

4 -2 -4 16.8612 2.99808 5

2 4 -4 15.6526 2.41648 5

4 -2 4 15.6829 2.65689 2

-4 -2 -4 16.9498 2.66085 3

-2 4 -4 14.3401 2.30495 1

4 2 4 17.6146 2.71234 1

2 -4 -4 15.3316 2.38149 5

2 -4 4 18.9446 2.38016 3

4 -4 2 16.9369 2.38575 1

-2 -4 -4 18.3848 2.54975 1

-4 2 4 14.4117 3.06471 11

-4 -2 4 10.3686 2.95543 11

4 -4 -2 24.0931 3.15894 11

4 4 -2 15.7836 2.84516 11

-2 -4 4 16.6496 2.75752 11

-4 -4 4 4462.12 89.5000 11

-4 4 4 4469.48 89.5462 11

4 -4 4 4380.69 87.5493 1

4 4 -4 4201.33 89.9070 4

4 -4 4 4624.41 88.7343 2

4 4 -4 4651.05 88.2200 5

4 -4 4 4531.76 88.0605 3

-4 4 4 4282.99 83.7860 4

4 4 4 4522.86 88.0360 1

4 -4 -4 4582.70 88.0109 5

4 4 4 4564.74 88.7552 17

4 -4 4 4434.82 88.3905 17

5 -1 -1 7085.47 130.893 11

1 -1 -5 6944.00 128.855 5

1 5 -1 7140.85 127.340 4

5 1 -1 6980.59 124.557 3

1 5 -1 7234.91 124.776 2

1 1 -5 6938.26 125.227 3

-1 -1 -5 7066.77 128.964 1

1 -5 1 7091.96 126.025 2

1 5 -1 6738.31 121.753 5

-1 1 -5 7253.87 126.912 3

1 -5 -1 6925.21 121.855 5

-5 -1 -1 7217.16 126.614 3

-1 1 -5 7204.99 127.908 2

1 5 1 6607.61 121.788 5

1 -5 1 6574.30 121.799 5

-1 5 1 6319.45 121.812 17

-1 -5 1 6674.49 122.121 17

5 -1 1 7143.35 130.041 17

3 5 -1 319.132 10.2110 11

-1 -5 3 332.082 10.1761 11

5 -3 -1 330.460 12.7351 11

-1 5 3 348.548 10.4674 11

-3 -1 5 330.146 13.1269 11

5 3 -1 358.931 13.0547 11

5 -1 -3 361.537 13.5733 11

3 -5 -1 331.339 10.1046 11

-5 -1 3 331.763 13.1481 11

3 -1 -5 353.311 12.6871 5

-1 -5 -3 370.669 9.94927 1

5 1 -3 352.016 12.3331 4

5 -3 -1 336.925 9.00051 4

1 -5 3 333.821 9.58511 5

5 -1 -3 360.786 11.5028 4

-5 -1 -3 334.597 11.5239 3

-1 -3 5 337.108 12.3884 4

3 5 -1 341.469 9.09041 2

1 -3 5 343.370 10.6609 3

1 5 -3 345.737 9.86101 5

-1 5 -3 345.248 9.76959 1

1 -3 -5 344.677 11.6546 5

1 -3 5 358.105 11.7579 5

-1 -3 5 352.431 11.7740 5

-3 -1 -5 332.808 12.2978 1

-5 -3 -1 348.244 10.5392 3

3 5 1 328.293 9.71205 1

1 5 -3 338.544 10.9899 2

-1 -3 -5 349.078 11.8612 1

-3 -1 -5 366.240 12.2015 3

-1 5 -3 350.694 11.5386 2

-1 3 5 353.365 11.8352 5

3 5 -1 422.362 13.4952 4

3 -5 1 323.374 11.1083 2

5 -1 3 361.120 12.8364 1

-3 -1 -5 348.111 10.7339 2

1 3 -5 349.281 11.7746 5

-3 1 -5 355.924 11.6895 2

1 3 5 350.926 11.6756 5

3 -5 1 308.266 9.51423 1

1 5 3 350.417 9.83235 5

1 -5 3 343.477 11.1311 4

-3 1 5 327.171 11.6153 4

1 -5 -3 345.533 9.77778 5

-1 3 -5 344.009 11.8423 1

5 -1 3 371.113 11.8376 2

-1 3 -5 344.327 11.9761 2

5 1 -3 330.696 8.53551 3

5 -1 3 327.570 12.6780 17

-5 -3 1 334.267 12.2511 17

-5 3 -1 357.789 12.2804 17

5 3 1 320.050 12.0891 17

-5 -3 -1 343.843 12.1430 17

-3 -5 1 346.318 10.2304 17

5 -3 1 343.155 12.4959 17

-5 3 1 351.620 12.6553 17

-3 5 1 326.588 10.1327 17

-5 3 3 3487.83 72.0730 11

5 3 -3 3370.91 72.1687 11

-5 -3 3 3509.70 72.0497 11

-3 -3 5 3496.85 72.1608 11

-3 3 5 3528.18 72.2577 11

-3 -5 3 3417.00 69.0984 11

5 -3 -3 3354.03 71.7569 11

5 3 3 3515.89 71.3975 17

3 -5 3 3374.25 68.6280 17

5 -3 3 3465.81 71.4128 17

3 5 3 3412.53 68.4454 17

5 -3 3 3575.73 70.5247 3

5 3 3 3478.06 70.5288 1

3 3 -5 3617.14 70.7538 5

3 -3 -5 3563.68 70.5800 5

-3 5 3 3293.50 63.4545 4

5 -3 3 3464.25 70.3824 1

3 -5 3 3319.99 67.9794 1

-5 -3 -3 3568.88 69.8348 3

3 3 5 3550.38 70.4163 5

-3 -3 -5 3509.35 70.5600 1

3 -3 5 3528.96 69.8664 3

-3 3 -5 3483.62 70.5239 1

3 -5 3 3602.22 69.8766 3

3 5 -3 3626.83 72.0995 4

3 -5 -3 3498.57 67.9980 5

-3 3 -5 3603.73 70.8193 2

5 3 3 3514.21 65.3495 2

5 3 -3 3585.86 72.3475 4

3 5 -3 3552.62 68.1563 5

-3 -3 -5 3560.68 66.1669 2

3 -3 5 3443.48 70.1045 5

-3 -3 5 3544.73 72.2682 4

3 -5 3 3515.01 70.0809 2

-5 -1 -5 628.838 18.7381 10

1 5 -5 614.755 17.9111 2

-5 -5 -1 628.911 16.1130 3

-5 1 -5 623.949 18.4831 3

5 -1 -5 626.851 19.2795 5

1 -5 5 633.242 18.4047 4

5 -1 5 627.105 17.7452 2

-1 -5 5 626.582 19.1601 4

5 -1 5 612.544 19.1898 1

-5 -1 -5 646.863 19.0136 6

-5 -5 1 622.926 13.8004 3

-5 -1 -5 614.226 18.5360 3

1 5 5 622.254 16.8801 5

1 -5 5 603.348 16.2226 3

-1 5 -5 626.100 18.3776 2

1 -5 5 620.908 16.7749 5

-1 -5 -5 624.838 17.0675 1

-1 5 -5 600.217 16.9032 1

-1 -5 5 597.334 14.3382 3

-5 5 1 608.956 18.0597 29

-5 -1 5 652.791 18.9257 25

-1 5 -5 588.596 17.4943 27

5 -5 1 608.858 17.7855 11

-1 5 5 598.313 17.5431 11

5 5 1 607.876 17.8267 11

-5 -1 5 643.303 20.8951 11

5 5 -1 600.062 18.0861 11

5 -5 -1 628.113 18.0882 11

-5 5 -1 638.608 17.9712 23

-5 5 1 603.508 17.5121 23

1 5 5 583.504 18.3516 19

-1 5 5 635.354 19.1089 19

5 -1 5 627.450 19.8183 17

-5 5 1 655.831 18.0011 17

5 5 1 596.172 18.8178 18

-5 -5 1 608.057 17.4985 17

-5 -3 -5 3502.34 71.0240 10

-5 3 -5 3412.35 70.8064 10

-5 5 -3 3504.35 70.5723 9

3 -5 -5 3416.15 69.1865 5

3 -5 5 3487.21 69.3456 5

5 -5 3 3400.08 69.0215 1

-5 3 -5 3394.59 70.5106 6

5 -3 -5 3557.59 71.6207 5

-3 5 5 3340.47 66.2913 4

5 -5 3 3481.38 70.8005 2

-5 -3 -5 3527.88 71.0986 3

5 -3 5 3411.79 70.9855 1

3 5 -5 3439.06 69.4959 5

-5 -3 -5 3370.46 70.7431 6

5 -3 5 3477.29 70.8541 3

3 5 5 3417.39 69.1930 5

3 -5 5 3318.51 69.2264 3

5 3 -5 3514.28 71.5314 5

5 -5 3 3415.73 70.4743 3

5 -3 5 3393.76 70.8089 2

5 3 5 3422.26 71.4047 1

5 5 3 3366.97 69.1761 1

-5 5 3 3458.63 70.4562 29

-5 -3 5 3384.47 70.4510 25

-5 3 5 3510.74 70.8514 25

-5 3 5 3515.27 73.4534 11

-5 -3 5 3335.80 72.8418 11

-3 5 5 3403.17 71.0538 11

5 3 -5 3340.99 71.3086 12

-3 -5 5 3348.24 70.6943 11

-5 5 3 3388.94 68.9035 23

-3 5 -5 3396.07 71.0476 22

-5 5 -3 3387.67 70.7320 22

-5 5 -3 3463.99 70.1053 23

-5 3 -5 3313.86 70.5920 22

-3 5 -5 3374.41 69.3827 23

5 5 3 3322.22 71.1719 19

-5 5 -3 3687.23 71.0927 20

3 5 5 3427.83 71.3735 19

5 5 3 3574.96 72.9847 18

5 -5 3 3429.82 70.5332 17

-5 5 3 3495.62 70.7996 17

-5 -5 3 3364.18 70.4215 17

5 5 3 3271.29 70.0536 17

5 -3 5 3258.13 71.4641 17

-5 3 -5 3455.81 69.6578 15

5 3 5 3563.02 72.6771 17

3 5 -5 3397.12 71.1153 16

-5 5 -5 3289.86 70.5841 10

5 -5 5 3409.25 71.2874 3

5 -5 5 3453.34 72.1506 2

-5 5 -5 3374.50 70.3001 6

5 5 -5 3453.49 71.2136 5

-5 -5 -5 3430.68 71.4709 3

5 -5 -5 3391.93 70.9192 5

-5 -5 -5 3398.41 70.5036 6

-5 5 5 3410.76 71.5513 29

-5 -5 5 3411.84 70.3137 25

-5 5 5 3490.21 70.8966 25

-5 5 -5 3451.01 70.9925 23

5 5 5 3542.64 73.0932 19

-5 5 -5 3453.46 71.9320 20

-5 5 -5 3509.45 72.1313 15

5 -5 5 3440.44 72.2682 17

5 5 -5 3415.79 72.4705 16

5 5 5 3477.37 72.2135 17

5 5 -5 3383.12 71.3426 12

-5 -5 5 3337.53 72.4463 11

-5 5 5 3482.30 73.1973 11

5 -5 -5 3335.95 70.7147 12

-6 0 0 0.44899 1.63807 17

0 -6 0 2.69730 1.08798 2

0 0 6-0.37746 1.41953 5

0 6 0 0.21757 1.08698 4

6 0 0-0.95470 1.89780 11

6 -2 0 1046.59 27.6491 11

6 0 -2 1043.62 28.4499 11

6 2 0 1065.28 27.6424 11

0 -6 2 982.992 20.0964 11

0 6 2 956.355 19.7758 11

0 2 -6 1024.27 23.3294 3

2 -6 0 1023.84 23.8374 2

0 -2 6 1023.66 25.6799 5

2 0 -6 1086.54 26.7332 5

-2 0 -6 1064.74 24.9299 2

6 -2 0 1030.53 25.0265 3

6 0 -2 1005.82 25.4872 4

2 6 0 978.719 19.5751 1

-2 0 -6 1086.17 25.5611 3

6 0 2 1029.54 24.9027 3

2 -6 0 1006.52 19.7516 1

0 2 6 1009.52 25.7866 5

-2 0 -6 1078.92 26.6590 1

2 0 6 1029.68 26.1996 5

-6 2 0 1026.59 27.1174 17

-6 0 2 1041.49 27.6246 17

-6 -2 0 1030.07 26.8493 17

6 0 2 1049.47 27.4693 17

6 -2 -2 1688.44 40.6575 11

6 2 -2 1697.38 40.8158 11

-6 2 2 1715.66 40.1724 17

2 6 2 1587.21 33.5023 17

-2 -6 2 1624.88 33.7673 17

6 -2 2 1702.82 39.9122 17

6 2 2 1683.50 39.7657 17

-6 -2 2 1678.97 39.9827 17

-2 6 2 1603.87 33.5846 17

2 -6 2 1637.40 33.6893 17

2 -6 -2 1671.93 33.1606 5

6 2 -2 1749.78 39.7726 4

-2 -2 6 1737.13 39.7218 4

2 2 -6 1673.37 33.7768 3

2 -2 6 1738.77 38.6290 5

6 -2 -2 1734.79 35.8443 4

2 2 -6 1635.93 38.9960 5

2 6 -2 1714.46 38.3095 4

2 -6 2 1694.60 36.9551 2

2 2 6 1681.75 38.4179 5

-6 -2 -2 1712.88 36.9453 3

-2 2 -6 1751.12 39.0249 1

6 -2 2 1621.36 37.5180 3

2 -2 -6 1693.21 38.7534 5

-2 2 -6 1719.78 38.1921 2

-2 -2 -6 1738.14 35.9795 2

2 6 2 1690.06 33.1916 5

-2 -2 -6 1741.73 38.9978 1

-2 2 -6 1745.40 37.3011 3

2 -6 2 1617.72 33.1328 5

2 6 -2 1681.94 33.2098 5

2 6 -2 1727.77 35.1919 2

-4 0 -6 1.32932 2.06073 6

6 0 4 2.69976 1.41050 2

-6 -4 0 0.41949 1.01227 3

6 0 4 1.48436 1.80511 1

0 -4 -6-0.78189 1.71004 1

0 6 -4 0.23600 1.09755 1

0 -4 6 0.74590 1.63133 5

-6 0 -4 0.46602 1.80331 6

0 -6 4-0.24331 1.01695 3

0 4 6 0.38069 1.62859 5

0 4 -6-0.39681 1.84544 1

4 0 -6 0.47601 2.21374 5

-6 0 -4-0.41241 1.40742 3

0 -6 -4 0.93671 1.15020 1

0 6 -4-0.36796 1.38374 2

0 -6 4 1.19188 1.73781 4

-4 0 -6-0.34008 1.38713 2

-4 0 6 0.43715 1.59483 4

0 -4 6-0.45658 1.86234 4

-6 -4 0-0.85409 1.78488 17

-6 4 0-0.43709 1.64369 17

6 0 4-0.52773 1.80097 17

6 4 0 0.46905 2.34320 18

0 6 -4 0.39416 1.56702 27

-6 0 4 0.44682 1.95443 25

0 4 -6-1.47093 1.86741 27

-4 0 6-0.44550 2.29853 25

4 -6 0 0.28318 1.34204 11

4 0 -6 0.47840 2.38990 12

-4 0 6-0.57174 1.88019 11

6 0 -4-1.13827 2.32144 11

4 6 0 0.29233 1.50827 11

-4 6 0 2.69634 1.98737 24

-6 4 0 2.33949 1.91512 23

-4 6 0 1.49343 1.95618 23

-4 6 0-0.38806 1.87288 22

-4 6 0-0.82700 1.80871 20

0 6 4 0.45749 1.91212 19

6 4 0 0.46800 2.17648 11

-4 0 -6 0.43870 2.00063 10

6 -4 0-1.40855 2.05373 11

-6 0 4 1.13983 2.43808 11

-6 0 -4 2.26573 1.89398 10

-6 4 -2 947.036 25.7081 10

-6 2 -4 980.682 26.4830 10

-4 2 -6 973.354 25.7256 10

-4 6 -2 970.995 25.3593 9

-4 -2 -6 942.970 25.9540 10

-6 4 -2 997.345 24.8689 9

-6 -2 -4 990.963 25.9550 10

-4 2 -6 965.069 26.0101 8

2 6 -4 1016.53 23.0699 5

-2 -4 -6 980.268 25.4749 1

-2 -4 -6 963.856 21.6968 2

6 -2 4 1044.44 26.0422 2

-4 2 -6 976.807 25.7274 3

-6 2 -4 973.263 26.0893 6

6 -2 4 1030.39 27.1083 1

6 2 4 957.043 26.5318 1

-6 -2 -4 1016.46 26.6276 6

2 -6 -4 1014.57 22.9536 5

-2 4 -6 972.206 25.4571 1

2 4 6 990.700 25.3969 5

2 -4 6 950.640 24.0665 3

2 -4 6 978.128 25.2130 5

4 2 -6 1066.08 27.1160 5

6 -4 2 965.099 25.4459 1

-4 2 -6 964.328 25.8141 6

-4 -2 -6 991.808 25.9774 6

-4 -2 -6 1009.63 26.3008 3

4 -2 -6 1018.78 26.7584 5

2 -4 -6 963.364 25.2674 5

6 4 -2 996.411 27.6442 4

2 -6 4 962.776 22.6388 5

6 4 2 939.938 20.1256 2

4 6 -2 947.227 26.7193 4

-2 -6 4 909.390 19.9567 3

-6 -4 -2 949.237 23.8522 3

-4 2 6 957.717 24.9037 4

4 -6 2 1004.89 25.3478 2

4 -6 2 946.387 22.7794 1

6 -4 2 1020.64 26.2873 2

-4 -2 6 882.764 26.3103 4

-6 -2 -4 1008.91 25.6298 3

-2 4 -6 999.046 26.1001 2

4 2 -6 947.835 19.1329 3

2 -6 4 958.790 24.2505 4

2 6 -4 971.789 24.2201 2

6 4 2 976.486 25.2741 1

6 2 -4 983.379 26.9709 4

6 -4 2 872.479 24.9333 3

4 -6 2 890.177 20.2931 4

2 -6 4 953.256 24.0503 3

-2 -4 6 1005.53 27.2998 4

6 -2 4 955.992 25.6034 3

2 4 -6 1016.65 25.6833 5

2 6 -4 996.328 25.4145 27

2 6 -4 969.096 25.8777 30

-4 6 2 934.325 25.4568 29

-6 4 2 964.340 24.9842 29

-6 2 4 984.303 26.0093 25

-6 -2 4 989.045 26.0028 25

-4 6 2 1005.18 24.7453 26

-4 2 6 975.054 25.9843 25

-4 -2 6 1011.95 26.1679 25

-2 6 4 918.632 23.9050 26

6 4 -2 978.048 27.1719 11

4 2 -6 928.629 26.1709 12

-6 2 4 1013.86 28.2158 11

-2 4 6 969.235 26.4610 11

-2 -6 4 951.163 23.7131 11

4 -2 -6 933.309 26.1631 12

6 -2 -4 937.552 27.4553 11

-4 2 6 966.210 27.8463 11

6 -4 -2 985.473 26.8277 11

-4 -2 6 922.680 27.5488 11

6 2 -4 999.006 28.2119 11

-2 -4 6 944.783 26.3601 11

-6 -2 4 937.879 27.6407 11

-6 4 -2 1040.34 25.4722 23

-2 4 -6 979.239 25.7056 22

-6 4 2 1014.47 25.3917 23

-6 2 -4 927.268 24.6856 22

-4 6 2 980.883 25.1404 22

-2 6 -4 915.408 24.9208 23

-2 6 -4 945.713 25.4005 22

-4 6 -2 987.233 25.3872 23

2 6 4 976.685 26.7844 19

-2 6 4 981.554 26.4076 19

-6 4 -2 993.763 25.5830 21

4 6 2 923.363 26.3914 19

2 4 6 980.401 25.5393 19

-6 4 -2 1015.81 25.0912 20

-4 2 -6 967.006 24.3694 15

-6 -4 2 953.411 26.2913 17

-6 4 -2 1006.11 25.2236 15

6 4 2 938.369 25.9816 17

6 4 2 1002.88 26.6590 18

6 -4 2 994.315 26.6072 17

6 2 4 990.718 27.5095 17

-6 4 2 1008.14 26.7080 17

-4 6 -2 987.784 24.6438 15

4 -6 2 932.336 23.3105 17

6 -2 4 914.362 26.7236 17

4 6 2 956.879 26.6612 18

-4 -6 2 947.026 23.5255 17

-6 2 4 949.332 24.9965 14

-4 -6 4 4.53429 2.13079 11

-4 4 -6 7.66798 2.60969 10

-4 6 4 4.63043 2.24253 11

-4 4 -6 5.73728 2.28077 8

-6 -4 -4 3.86877 2.25605 10

-4 6 -4 6.34584 2.63720 9

-6 4 -4 2.96389 2.38766 10

4 -4 -6 10.0485 2.85899 5

4 4 -6 21.8621 3.60226 5

4 6 -4 7.71956 2.31152 5

4 4 6 28.4736 3.88663 5

-6 -4 -4 4.68294 2.26787 3

6 -4 4 5.52995 2.38122 1

4 -4 6 6.27879 2.28125 5

4 -6 4 8.59781 2.08114 4

-6 -4 -4 6.42243 2.51386 6

4 -6 -4 7.46659 2.21449 5

-4 4 6 4.74727 1.85293 4

6 4 4 6.10777 2.42759 1

6 -4 4 6.08443 2.34178 3

4 -4 6 4.30762 2.11980 3

4 -6 4 5.12165 2.02697 3

4 -6 4 7.21486 2.33022 2

-6 4 -4 8.53270 2.72013 6

6 4 -4 8.05002 2.92290 4

-4 -4 -6 7.53840 2.86284 6

4 6 -4 7.83702 2.89115 4

-4 6 4 3.87993 2.34433 29

-4 4 6 7.05112 2.62421 29

-6 4 4 2.93751 2.20259 29

-6 4 4 33.0447 4.29259 25

-4 -4 6 12.3233 3.21400 25

-6 -4 4 31.5756 4.19715 25

-4 6 4 6.20755 2.31109 26

-4 4 6 7.67976 2.70501 25

6 4 -4 9.65533 3.37680 12

4 -4 -6 18.4284 3.78406 12

-4 -4 6 6.75556 2.81539 11

4 4 -6 21.5829 3.96341 12

6 -4 -4 5.38220 2.71769 12

-4 4 6 3.98448 2.70081 11

-6 4 -4 8.62452 2.57132 23

-4 4 -6 7.51677 2.14479 23

-6 4 -4 4.39507 2.40213 22

-4 6 -4 8.29095 2.91636 22

-4 6 4 7.54279 2.32060 23

-4 6 -4 3.66619 2.17582 23

-4 4 -6 4.72846 2.62788 22

6 4 4 10.4255 2.92627 19

-4 6 -4 7.55478 2.94428 20

4 6 4 2.81793 2.52162 19

-6 4 -4 6.52165 2.49729 20

-6 4 -4 5.45534 2.57085 21

4 4 6 6.10327 2.54934 19

-4 4 -6 9.95038 2.86102 15

4 6 4 10.3321 2.59173 17

6 4 4 14.6996 3.52105 17

4 6 -4 12.7188 3.42030 16

6 4 -4 3.92079 2.57837 16

6 -4 4 5.78552 2.75882 17

-6 4 -4 5.83111 2.49194 15

-4 6 -4 12.4100 3.13397 15

6 4 4 5.55238 3.24528 18

4 -6 4 9.64410 2.48919 17

4 6 4 6.07678 3.08868 18

-6 0 -6 914.329 27.1019 6

0 6 -6 900.350 23.8333 1

0 -6 6 945.856 23.6928 5

0 -6 6 883.104 21.7080 3

0 -6 6 911.289 25.9789 4

6 0 -6 927.243 26.8517 5

0 -6 -6 930.971 23.9410 1

-6 -6 0 894.422 21.0981 3

-6 0 -6 922.008 25.7699 3

6 0 6 953.619 27.3684 1

0 6 -6 942.010 25.5063 2

6 6 0 899.795 27.4657 18

6 0 6 927.245 27.6302 17

-6 0 -6 923.891 23.1994 15

-6 0 6 914.363 26.9828 25

-6 0 6 927.570 28.5476 11

6 0 -6 875.314 27.3132 12

0 6 6 898.869 23.5117 13

6 -6 0 926.178 24.9242 11

6 6 0 900.884 25.0165 11

-6 6 0 900.183 24.8467 22

0 6 -6 913.781 24.7133 22

-6 6 0 931.921 25.7023 23

0 6 6 907.296 27.0231 19

0 -6 -6 913.844 24.8777 7

-6 0 -6 917.245 27.1080 10

-6 -2 -6 1358.55 35.7108 10

-6 2 -6 1388.61 35.9940 10

-2 6 -6 1408.81 32.9400 8

-6 6 -2 1314.81 33.4370 10

-6 6 -2 1386.75 34.7043 9

-6 2 -6 1310.50 34.9105 8

-2 -6 -6 1305.67 32.2431 8

6 -6 2 1396.94 34.4833 3

6 2 -6 1428.43 35.9189 5

-6 -2 -6 1375.41 35.8754 6

-2 6 -6 1318.59 32.2977 1

2 6 -6 1337.75 32.3594 5

6 -2 -6 1384.23 35.3659 5

-2 -6 -6 1355.11 32.4252 1

6 2 6 1362.98 35.5487 1

-6 2 -6 1324.81 35.4481 6

-2 -6 -6 1311.56 26.9216 2

2 -6 6 1312.45 31.7355 3

2 -6 6 1349.95 33.5177 4

2 -6 -6 1447.35 32.6705 5

-6 -6 -2 1359.08 31.5970 3

2 6 -6 1385.20 33.6607 2

-2 6 -6 1421.66 34.7234 2

6 -2 6 1418.55 35.7199 1

2 6 6 1357.62 32.1465 5

6 -6 2 1340.05 34.0066 2

2 -6 6 1378.06 32.1247 5

6 -6 2 1316.33 31.8835 1

-6 -2 -6 1392.25 34.5670 3

6 6 2 1350.33 32.1429 1

-6 6 2 1344.31 34.9110 29

-2 6 -6 1317.57 33.3542 30

-2 6 -6 1369.81 34.4664 27

-6 6 2 1324.77 32.4557 24

-6 2 6 1357.72 35.5588 25

-6 -2 6 1365.10 35.5502 25

-2 6 6 1386.99 32.7650 26

-2 -6 6 1351.40 33.6683 11

6 -6 -2 1372.95 33.6238 11

6 6 2 1301.98 33.1646 11

6 -6 2 1390.29 33.7521 11

6 2 -6 1346.87 36.4994 12

6 -2 -6 1369.92 36.3407 12

-6 -2 6 1342.79 37.0029 11

-6 2 6 1436.53 37.6985 11

-2 6 6 1320.47 33.4567 11

6 6 -2 1305.45 33.7382 11

-6 6 -2 1354.17 31.9797 13

-6 6 2 1358.56 33.1472 22

-6 6 2 1341.29 33.7671 23

-2 6 -6 1360.58 34.0201 23

-2 6 -6 1308.10 34.6471 22

-6 6 -2 1329.14 34.3447 22

-6 6 -2 1419.08 35.1565 20

-6 2 6 1383.01 31.9776 21

-6 6 -2 1313.41 34.1658 21

2 6 6 1357.32 35.9383 19

6 2 6 1417.89 36.7336 17

-6 -6 2 1355.34 33.3351 17

-6 2 -6 1353.26 33.0832 15

-6 6 -2 1333.90 33.9821 15

-6 6 2 1433.99 33.8220 17

-2 6 -6 1351.29 33.9683 15

6 6 2 1394.39 36.7552 18

6 -2 6 1335.57 35.7990 17

-6 6 -2 1341.73 32.4377 14

-6 4 -6 335.592 14.1204 8

-4 6 -6 372.197 13.3200 8

-6 -4 -6 356.007 15.1723 10

-6 4 -6 333.678 14.6860 10

-6 6 -4 363.847 15.2020 9

-6 6 -4 327.065 13.5873 10

-6 -6 -4 332.525 12.6730 10

-4 6 -6 338.070 12.7595 10

6 -4 6 342.353 14.0467 3

6 6 4 334.174 13.1666 1

-6 -4 -6 331.362 13.9497 3

4 -6 6 352.153 13.2675 5

6 -6 4 338.287 14.0438 2

6 -6 -4 329.529 12.9922 5

6 6 -4 353.109 13.4036 5

-6 -6 -4 347.704 13.1463 6

-6 6 -4 339.358 12.9670 6

4 -6 6 330.692 13.1917 3

4 6 6 335.750 12.9425 5

6 4 -6 351.199 14.4701 5

4 6 -6 365.666 13.5600 5

6 -6 4 326.920 13.6499 3

6 -4 -6 364.096 14.6635 5

4 -6 -6 329.832 12.8411 5

-6 -4 -6 325.216 14.3561 6

-6 4 -6 306.959 13.9557 6

-4 -6 -6 360.109 13.4706 6

6 -6 4 323.983 12.8965 1

-6 -6 -4 334.746 13.1596 3

-4 6 -6 329.757 12.8768 6

4 6 6 344.779 12.4360 28

-6 4 6 337.969 13.4008 29

-6 6 4 346.130 14.7963 29

-4 6 -6 336.212 12.6747 30

-4 6 6 352.467 14.6995 29

4 6 -6 339.115 12.6824 28

-6 6 4 368.283 13.6834 25

-6 -4 6 343.301 14.6143 25

-4 6 6 342.572 12.4984 26

-4 6 6 350.798 13.4096 25

-4 -6 6 360.183 13.3221 25

-6 4 6 347.215 14.7695 25

-6 -6 4 319.327 12.7470 25

4 -6 -6 337.845 13.0346 12

4 6 -6 337.728 13.4620 12

-6 4 6 343.639 15.5268 11

6 -4 -6 322.349 14.7224 12

-4 6 6 324.164 14.0313 11

6 6 -4 338.189 13.6689 12

6 -6 -4 340.758 13.4713 12

6 4 -6 360.686 15.5699 12

-4 -6 6 326.877 13.9202 11

-6 -4 6 347.511 15.4045 11

-6 4 -6 337.273 12.9315 23

-6 4 -6 335.083 15.0859 22

-6 6 -4 356.144 15.3218 22

-6 6 4 341.088 13.5383 23

-4 6 -6 334.707 15.2197 22

-4 6 -6 332.045 13.8486 23

-6 6 -4 326.643 14.1053 23

-6 4 -6 341.517 12.8087 21

-6 4 -6 342.258 13.6880 20

4 6 6 361.190 15.7152 19

-6 6 -4 338.482 14.6467 20

6 6 4 323.951 15.0273 19

-6 6 -4 337.939 13.6912 21

6 4 6 366.102 13.9774 19

-4 6 -6 330.278 14.6877 20

4 6 6 338.386 13.4556 17

6 4 6 369.709 15.4989 17

6 6 4 363.506 16.5562 18

-6 4 -6 371.573 14.7918 15

-6 6 -4 336.268 12.2319 14

4 -6 6 364.961 14.3135 17

6 4 -6 335.072 13.9902 16

6 6 -4 358.994 15.3600 16

-6 -6 4 322.960 13.7106 17

4 6 -6 360.016 15.5660 16

6 -4 6 345.551 15.0209 17

6 -6 4 329.100 13.8156 17

6 6 4 335.621 13.7067 17

-6 6 4 346.229 14.0832 17

-6 6 -6 1048.40 29.9938 10

-6 6 -6 1074.90 28.5075 8

6 6 6 1129.72 29.6203 5

6 -6 6 1075.64 29.1929 5

-6 6 -6 1047.48 29.7306 6

-6 -6 -6 1118.52 30.3009 6

6 -6 -6 1079.44 29.3817 5

6 6 -6 1087.10 29.6474 5

-6 6 6 1060.19 31.2296 29

-6 -6 6 1069.30 29.7142 25

-6 6 6 1070.42 30.2337 25

-6 6 6 1074.73 26.9687 26

6 6 -6 1106.32 31.1021 12

6 -6 -6 1033.15 30.0247 12

-6 -6 6 1058.33 30.7327 11

-6 6 6 1116.75 31.5962 11

-6 6 -6 1084.83 30.6134 23

-6 6 -6 1052.41 28.0515 21

6 6 6 1098.22 32.5621 19

-6 6 -6 1124.99 31.9998 20

6 6 -6 1104.16 32.6036 16

-6 6 -6 1086.40 31.8554 15

6 6 6 1075.14 30.3658 17

6 -6 6 1055.40 30.8093 17

7 -1 -1 41.1510 5.01067 11

-7 1 -1 34.7560 4.29360 10

1 1 -7 30.5154 4.19514 8

-1 1 -7 33.6004 4.34359 8

-1 -1 -7 39.0156 4.48214 8

7 -1 1 45.7842 4.02910 3

1 1 -7 42.4450 3.48820 3

-1 1 -7 49.3849 4.12924 3

1 -1 -7 40.3439 4.61153 5

1 7 -1 39.6763 3.71387 4

-1 1 -7 48.3359 4.38553 2

1 -7 1 38.7860 3.39508 2

1 -1 7 58.4007 5.05884 5

-1 -1 -7 41.6301 4.47919 1

7 1 1 37.8739 3.58082 3

-1 7 1 38.9280 2.51872 4

-1 -1 7 43.9589 4.42681 5

7 -1 -1 35.6492 3.38177 3

1 -7 -1 39.5108 3.13796 2

-1 -1 -7 40.2385 4.64339 7

1 -1 -7 32.3886 4.20545 7

-1 7 1 40.3354 4.18728 28

1 7 1 33.0111 3.74932 26

-1 7 -1 35.9869 3.92870 26

-1 7 1 33.7301 3.74776 26

-1 7 -1 37.4186 4.25239 24

-1 7 1 33.6744 3.89655 24

-1 7 -1 42.1977 4.32532 22

-1 7 -1 32.2155 3.82876 23

-7 -1 -1 33.1663 4.02361 21

1 7 1 42.8028 4.57699 19

-1 7 1 35.3345 4.18911 22

-7 1 1 39.1318 4.39472 21

-7 1 -1 34.9065 4.13490 21

-7 -1 1 42.0721 4.76375 17

-7 -1 -1 41.0984 4.57530 17

-3 1 -7 1745.67 41.2464 7

1 -3 -7 1864.57 42.2010 7

-3 -1 -7 1716.16 42.1444 8

-3 7 -1 1835.67 40.8648 9

-1 -3 -7 1866.21 41.5469 8

-1 -3 -7 1867.43 42.6310 7

-7 -1 -3 1846.53 42.1678 10

-7 1 -3 1815.73 42.5201 10

-1 3 -7 1763.87 41.5973 8

-7 3 -1 1793.45 42.3429 10

-1 7 -3 1778.66 39.7219 9

7 -1 -3 1852.24 40.3837 4

3 -7 -1 1732.02 34.9602 5

1 3 -7 1840.99 37.2383 3

-7 -1 -3 1846.81 40.9731 3

7 1 3 1828.16 39.1710 2

-7 -3 -1 1847.08 38.6870 3

-7 -1 -3 1780.39 42.5133 6

-3 1 7 1788.96 41.5717 4

1 7 -3 1717.15 34.9440 1

-1 3 -7 1874.71 41.8784 2

1 -3 -7 1883.81 41.9141 5

1 3 7 1828.80 41.6228 5

-3 1 -7 1831.68 40.9104 3

-3 -1 -7 1747.74 41.2248 3

1 -7 -3 1781.50 35.1588 1

-1 -3 7 1828.95 42.9692 4

-1 -3 7 1878.26 41.8761 5

3 -1 -7 1878.41 42.8311 5

-3 1 -7 1811.73 40.8301 2

7 -1 3 1851.06 41.1383 3

1 -3 7 1830.96 41.4369 5

3 7 -1 1789.43 34.9894 5

-1 -3 -7 1829.04 41.9629 1

1 3 -7 1827.17 41.7925 5

3 1 -7 1757.17 36.6541 3

-1 3 -7 1858.76 42.1340 1

-3 -1 -7 1798.97 41.8944 6

-1 3 7 1810.54 41.7353 5

-3 -1 7 1793.28 42.5136 4

3 7 -1 1828.68 41.8446 4

7 -1 3 1920.92 43.6081 1

7 -3 -1 1785.89 37.3607 4

7 -1 3 1987.91 41.4855 2

7 1 -3 1901.61 42.3883 4

1 7 -3 1838.73 39.1592 2

7 -3 1 1780.06 40.7175 3

3 -7 1 1825.60 39.9584 2

-3 -1 -7 1843.42 42.4641 1

-3 -1 -7 1860.57 39.7553 2

3 -1 7 1910.61 42.5032 5

7 1 -3 1774.40 36.0151 3

-3 7 -1 1841.20 40.5987 30

-3 7 1 1823.62 41.0549 30

-1 7 3 1884.36 41.4853 30

1 7 3 1850.20 40.7541 30

-1 7 3 1785.86 40.0254 28

-3 7 -1 1810.88 40.8862 29

1 7 3 1842.25 40.4040 28

3 7 1 1792.38 41.2668 28

-1 7 3 1894.54 41.7810 29

1 7 -3 1747.33 40.2775 28

1 7 -3 1831.39 41.7808 30

-1 7 -3 1831.99 41.4721 30

3 7 -1 1793.47 40.6212 30

-1 7 -3 1780.81 40.3070 28

-1 7 3 1766.05 40.3570 26

-7 -1 3 1810.43 42.1112 25

-3 -1 7 1841.34 41.9646 25

1 7 -3 1861.15 40.9915 27

-3 7 -1 1810.56 41.4337 24

-7 3 1 1723.91 40.8559 25

-7 -3 1 1748.96 40.7448 25

-3 7 1 1767.29 40.9958 24

-3 7 1 1834.05 40.8729 26

-7 3 -1 1888.70 41.4420 14

-1 3 -7 1868.29 41.5707 12

-1 -7 3 1746.58 35.6896 11

7 -3 -1 1881.00 44.3618 11

-3 -1 7 1701.30 43.3848 11

7 3 -1 1814.11 43.8000 11

3 7 1 1792.30 35.8133 11

3 -1 -7 1819.69 42.6081 12

-3 7 -1 1836.68 40.6789 13

3 -7 1 1768.64 35.6848 11

-1 7 -3 1772.63 40.3967 13

7 3 1 1772.33 42.9773 11

7 -3 1 1761.81 43.3615 11

1 3 -7 1827.31 41.5297 12

-1 7 3 1750.75 40.5090 13

-1 7 3 1687.09 35.2979 11

7 -1 -3 1826.42 44.5774 11

-3 7 1 1796.36 39.9865 23

-3 7 -1 1837.25 40.9745 23

-1 7 -3 1750.87 40.9524 23

-1 7 -3 1751.09 40.8046 22

-3 7 -1 1871.74 41.8411 22

-7 3 -1 1879.79 41.1191 23

-7 3 1 1922.94 41.7680 23

-3 7 -1 1931.91 41.9709 20

-7 1 3 1857.40 40.5078 21

-1 7 3 1782.88 41.9206 19

-1 7 -3 1933.44 42.1197 20

3 7 1 1717.54 42.3402 19

-7 3 1 1877.83 42.1297 21

-7 1 -3 1842.38 41.4269 21

-7 1 3 1821.08 40.7680 14

-7 3 -1 1819.58 42.6088 17

1 7 -3 1860.73 41.8318 16

-7 -3 -1 1850.60 42.7041 17

3 7 -1 1777.31 41.8534 18

-7 -3 1 1832.08 43.0201 17

3 7 1 1798.49 42.2398 18

1 7 3 1650.82 34.9689 17

-7 -1 3 1766.62 43.6827 17

-7 3 1 1858.24 43.2153 17

7 3 1 1791.04 41.6176 18

7 -1 3 1837.04 43.7306 17

1 -7 3 1642.22 35.4302 17

-3 -3 -7 2.61980 2.43758 8

-3 7 -3 3.25534 2.36245 9

-7 3 -3 3.26526 2.67371 10

-7 -3 -3 7.62296 2.65125 10

-3 3 -7 5.08469 2.70490 8

-7 3 -3 6.92667 2.67372 9

7 3 -3 1.12079 2.16941 4

-3 -3 7 2.22460 2.15300 4

7 -3 3 3.10624 2.11262 1

-3 -3 -7 1.95844 1.89564 1

7 3 3 4.48093 2.13087 1

3 -7 -3 3.51411 1.44591 5

3 3 7 2.91199 2.12384 5

3 7 -3 2.01631 1.27765 5

-7 -3 -3 2.35164 1.75241 3

-7 -3 -3 3.07026 2.72213 6

-3 3 -7 2.34975 2.18650 2

3 -7 3 3.95668 1.51497 5

3 7 -3 3.20327 1.45613 2

3 -7 3 2.88453 2.25594 2

3 -3 7 4.76444 2.49710 5

3 3 -7 4.47397 2.39998 5

3 -3 -7 6.84127 2.56110 5

7 -3 3 2.45517 1.79255 2

-3 -3 -7 4.16575 1.60324 2

-7 3 -3 5.11725 2.83970 6

-3 -3 -7 5.26173 2.50703 6

-3 3 -7 2.45562 2.28492 6

-3 3 -7 1.99249 2.03278 1

-3 3 7 3.26264 2.00412 4

3 7 -3 3.54067 2.16477 4

3 7 3 7.84916 2.60880 28

3 7 -3 4.53612 2.34124 28

3 7 -3 5.39748 3.03598 30

-3 7 -3 6.90029 2.80977 30

-3 7 3 2.47498 2.16610 29

-3 7 3 4.21306 2.27419 26

-7 -3 3 4.84144 2.75834 25

-3 -3 7 3.32352 2.52583 25

-3 3 7 1.44525 2.19786 25

-7 3 3 12.8049 3.20849 25

3 7 -3 4.21886 2.34143 27

7 3 -3 4.90515 3.16411 11

7 -3 -3 2.98449 2.88145 11

-3 3 7 2.93867 2.57160 11

3 3 -7 11.2800 3.43705 12

-7 3 3 0.98765 2.38414 14

3 -3 -7 4.99703 2.88319 12

-3 7 -3 6.62131 2.56246 13

-3 -3 7 2.34070 2.66935 11

-7 3 -3 2.93794 2.13229 22

-7 3 -3 2.84797 1.99932 23

-3 7 -3 0.47615 2.81515 23

-3 7 -3 2.02948 2.40538 22

-3 7 3 6.70609 2.22731 23

-7 3 -3 3.86077 2.64173 21

3 7 3 4.69380 2.67642 19

-7 3 3 3.34391 2.42668 21

-3 7 3 2.98736 2.31640 22

-3 7 -3 4.64127 2.35260 20

-3 7 3 4.36360 2.69061 19

7 -3 3 1.68991 2.35525 17

3 -7 3 3.06708 1.43842 17

-7 -3 3 1.14582 2.39538 17

-7 3 -3 5.99605 2.47137 15

-3 7 -3 6.31071 2.56982 15

7 3 3 1.68418 2.40246 17

-3 -7 3 3.18760 1.53360 17

-7 3 3 5.77743 2.78903 17

-3 7 3 3.88751 1.51489 17

3 7 -3 3.76137 2.68508 16

3 7 3 4.23448 1.70128 17

7 3 3 6.46000 2.83111 18

-3 3 -7 0.43852 2.36705 15

-5 7 -1 2022.37 46.4154 9

-1 -5 -7 2007.04 44.5617 8

-7 -1 -5 2001.23 47.5833 10

-5 -1 -7 2022.12 47.6520 10

-7 5 -1 1885.55 46.3684 10

-5 -1 -7 1934.89 47.6581 8

-5 1 -7 1882.64 47.0853 8

-1 5 -7 1968.58 45.7997 8

-7 5 -1 1966.05 45.2695 9

1 -5 -7 2005.34 45.9036 7

-7 1 -5 1939.24 47.5784 10

5 7 -1 1898.48 38.2849 2

-1 -7 5 1918.60 40.0418 3

5 7 1 1926.85 41.4256 1

1 -7 -5 1971.84 41.6938 1

-7 -1 -5 1995.36 45.6680 3

1 -5 7 1948.67 46.0417 4

7 1 -5 1910.62 38.2558 3

5 -7 1 1984.92 44.8712 2

1 5 -7 1984.22 45.7435 2

1 7 -5 1948.30 41.7049 1

-1 5 -7 2091.16 45.4299 1

5 -1 -7 2068.52 47.5419 5

-1 7 -5 1932.60 41.5722 1

-5 1 7 1991.60 45.9841 4

5 7 -1 2050.49 47.6520 4

7 -1 5 2002.00 44.6732 2

-7 -1 -5 1954.89 47.7822 6

1 -7 5 1993.42 41.3927 5

1 -5 7 2006.27 44.6033 5

1 -7 5 1957.36 42.3439 3

1 5 7 1990.30 44.8222 5

-5 -7 1 1939.48 39.3240 3

1 7 5 1973.42 41.6227 5

-5 -1 -7 1973.75 47.4420 6

-1 -7 -5 1996.52 41.7186 1

7 1 5 1972.29 42.7930 2

7 -1 5 2131.14 48.4733 1

-5 -1 -7 2038.87 46.3040 3

-1 -5 7 2023.09 47.1712 4

-7 5 -1 1952.15 44.7756 6

-7 -5 -1 1889.92 44.4396 6

-1 -5 -7 2021.68 45.0636 1

1 -7 5 2061.85 45.1084 4

-5 -1 7 2042.19 47.2954 4

1 7 -5 2055.33 44.7446 2

-7 -5 -1 1974.39 41.6813 3

5 -7 1 1958.57 41.4662 1

-5 7 1 1978.17 46.8465 29

-5 7 -1 1941.19 44.2221 30

1 7 5 2019.36 45.2876 30

1 7 5 2035.80 43.6332 28

1 7 -5 1943.51 43.7114 28

-5 7 1 2081.88 45.5814 30

5 7 -1 1928.59 44.3042 30

-1 7 -5 1990.90 46.2931 30

-1 -5 7 1948.30 43.8968 25

-7 5 1 1961.49 43.3421 24

-1 7 -5 2036.97 46.6054 27

-7 -1 5 1978.86 47.3527 25

-1 5 7 1964.95 44.1287 25

1 7 -5 1994.56 43.5363 24

-5 7 1 2026.93 45.6240 24

1 7 -5 1946.63 46.1037 27

-1 7 5 2091.44 45.9210 26

-5 -1 7 1960.53 47.2464 25

-1 5 -7 2017.80 45.6560 27

-1 -5 -7 2055.81 44.4773 12

5 -1 -7 1968.92 48.1368 12

7 -5 1 2012.98 46.6950 11

5 7 -1 1874.98 42.7127 11

-7 -1 5 2038.72 49.2968 11

-1 7 5 1995.34 44.9506 13

5 -7 -1 1994.66 42.6903 11

-1 7 5 1947.66 42.7368 11

-1 5 -7 1994.46 44.7179 12

1 -5 -7 2045.28 44.5327 12

5 -7 1 1920.25 42.3906 11

7 5 1 1979.79 46.4096 11

7 5 -1 1981.31 46.9171 11

7 -5 -1 1976.58 46.6031 11

1 7 5 1974.69 43.7913 13

-1 -7 5 1970.84 42.7286 11

1 5 -7 2010.40 44.9054 12

5 7 1 1998.88 43.0848 11

-5 7 -1 1996.29 44.9183 13

-5 -1 7 1948.27 49.0562 11

7 -1 -5 2018.61 48.9457 12

-7 5 1 2031.34 46.1729 23

-1 7 -5 1815.05 45.5031 23

-5 7 1 1956.26 45.3337 23

-5 7 1 1938.32 45.4925 22

1 7 -5 2006.69 44.0908 22

-1 5 -7 1990.75 45.7842 22

1 5 -7 1982.62 43.7042 22

-5 7 -1 1955.62 45.8446 23

-5 7 -1 1955.00 46.1571 22

-1 5 -7 1909.50 44.3910 23

-1 7 -5 1987.85 45.7672 22

-7 5 -1 1971.97 44.4685 22

-7 5 1 1973.58 43.4671 22

1 5 7 1911.50 46.8070 19

-7 5 1 1958.97 46.8549 21

1 7 5 2000.98 48.1023 19

-7 5 -1 2003.72 46.7895 21

-7 1 5 2000.93 43.5012 21

-5 7 -1 2057.08 47.1211 20

-7 5 1 1996.46 46.2181 14

7 -1 5 2002.52 48.3683 17

-5 7 -1 1980.33 44.8950 15

-7 -5 1 1947.71 45.7305 17

-1 7 -5 1991.13 44.3938 15

-7 1 -5 2021.06 43.8507 15

-5 7 1 2000.27 41.9615 17

-7 5 -1 1980.44 45.3651 14

-5 -7 1 1918.31 41.7461 17

-7 5 1 1976.03 45.9334 17

-7 -1 5 2029.11 43.4767 14

5 7 -1 1872.35 47.6694 18

7 5 1 1979.72 47.8345 18

-5 1 -7 2007.66 44.0156 15

1 7 -5 1928.02 46.7353 16

-5 3 -7 49.2234 5.00810 7

-5 3 -7 55.7525 5.99101 10

-7 -3 5 44.4533 5.86565 11

-7 -5 -3 46.1285 4.77914 10

-3 5 -7 44.7117 5.22922 8

-5 -3 7 48.2080 6.03178 11

-7 5 -3 44.5065 5.61828 10

-7 5 -3 43.5718 5.18174 9

-5 3 7 50.4591 6.08882 11

-7 -3 -5 48.1694 5.64808 10

-7 3 -5 46.8660 5.75163 10

-5 7 -3 52.6109 5.81411 9

-5 3 -7 48.3498 5.62686 8

-3 -5 -7 45.9730 5.55794 8

7 -3 5 38.2774 5.04218 1

-3 -5 7 44.3852 5.90349 4

7 -5 3 50.2371 4.98999 1

7 -5 3 54.4530 5.43831 2

5 -7 3 52.9932 5.25608 3

7 5 3 44.9548 4.79339 1

5 3 7 46.4607 5.40542 5

5 -7 3 41.2438 4.62300 2

-5 -3 -7 51.8389 5.74864 6

-5 3 -7 50.4207 5.74692 6

7 -5 3 54.8863 5.36033 3

3 5 7 44.7845 4.71611 5

7 3 -5 53.1903 5.92311 4

3 7 -5 51.2555 4.33383 5

-7 5 -3 52.7038 5.32595 6

7 3 -5 45.8773 5.51844 5

-3 -5 -7 51.3461 5.11793 1

-7 -5 -3 57.2473 4.89602 3

7 -3 -5 61.4330 6.02038 5

-7 3 -5 62.3119 6.27547 6

5 7 -3 46.1378 3.75576 2

3 5 -7 50.6012 5.25541 5

7 3 5 58.3891 5.87517 1

-3 5 -7 49.8567 5.05563 1

5 -7 -3 46.3531 4.12312 5

-7 -5 -3 58.9022 5.70177 6

3 7 5 51.4129 4.31910 5

5 3 -7 40.4194 5.06174 5

3 -5 7 42.0601 4.75802 5

3 -5 7 51.7451 4.79725 3

5 -3 7 39.1494 5.01197 5

-3 5 -7 48.8261 5.44917 2

3 -7 5 60.2155 5.05939 3

3 -5 -7 45.0171 4.79003 5

7 -3 5 43.8184 5.07504 3

-3 7 5 44.7172 2.67618 4

-7 -3 -5 47.4798 4.92286 3

5 7 -3 43.2607 4.09855 5

3 -7 5 46.0060 4.08729 5

5 7 3 53.0932 4.34400 1

3 -7 5 45.2581 4.41717 4

7 5 -3 56.0087 6.10421 4

5 -3 -7 46.1417 5.26406 5

-3 -5 -7 45.0464 3.04038 2

5 -7 3 47.4912 3.04931 4

3 -7 -5 48.2093 4.16103 5

-5 -3 -7 48.5147 5.37540 3

-5 3 7 51.5214 4.78551 4

3 7 -5 43.0322 4.47185 2

-7 -3 -5 53.4377 5.98885 6

5 -7 3 49.7840 4.29010 1

7 -3 5 55.2128 5.59534 2

5 7 -3 44.6199 5.69354 4

-5 3 7 48.2217 4.90930 29

-7 3 5 47.8938 4.70539 29

-3 7 -5 43.6282 5.06984 30

3 7 5 42.0692 4.69298 28

-5 7 -3 49.0761 4.90840 30

-7 5 3 50.3094 5.52282 29

3 7 -5 43.2896 4.79567 28

-3 7 5 49.5530 5.65517 29

5 7 -3 52.2473 5.65636 30

-5 7 3 41.7687 5.53448 29

3 7 5 39.1672 4.60699 30

-3 7 5 37.9699 4.54262 26

-5 3 7 50.0259 5.93600 25

-7 -3 5 58.5946 6.03464 25

-5 7 3 46.5636 5.10993 26

-3 -5 7 48.7469 5.31904 25

-5 -3 7 42.2920 5.55451 25

-3 5 7 45.5794 4.24575 26

-3 5 7 45.7052 5.08814 25

-7 -5 3 51.2002 5.32300 25

-7 5 3 36.2792 4.82871 25

-7 3 5 45.3523 5.53489 25

3 7 -5 48.1751 5.55106 27

-7 5 -3 41.3339 4.76279 14

3 7 5 50.5461 4.78259 13

3 5 -7 38.9703 5.06462 12

-5 7 -3 49.1202 4.92903 13

7 -3 -5 50.4938 6.13749 12

-3 -7 5 45.4262 4.57359 11

3 -5 -7 48.6876 5.25220 12

7 5 -3 46.6926 5.56223 11

-3 5 7 52.6453 5.83252 11

-3 7 5 53.9114 4.97500 11

7 -5 -3 43.4912 5.33874 11

5 3 -7 36.2621 5.53896 12

7 3 -5 50.1829 6.45624 12

-3 -5 7 47.5682 5.71216 11

5 -3 -7 49.6685 6.07863 12

-5 7 3 36.7181 4.71515 23

-7 3 -5 55.9543 5.17363 23

-3 5 -7 41.9521 5.47080 22

-7 5 -3 49.9680 5.36591 23

-7 5 -3 50.5924 5.35433 22

-3 5 -7 40.8576 4.64247 23

-3 7 -5 53.8839 5.62576 23

-7 3 -5 52.0897 5.56673 22

-3 7 -5 54.1898 5.93546 22

-5 3 -7 40.9514 4.14731 23

5 3 7 50.6764 4.88096 19

-5 7 3 45.8944 5.52977 22

-7 3 -5 48.1572 5.23758 21

-7 3 -5 45.2355 4.56396 20

5 7 3 60.4530 6.76421 19

-7 5 -3 43.8773 5.31059 20

-5 3 -7 51.7725 5.06541 20

-7 3 5 38.8065 4.73230 21

-7 5 3 52.1535 5.94919 21

-7 5 3 42.4559 4.53248 22

-5 7 -3 53.3254 5.39725 21

-7 5 -3 48.7532 5.76037 21

3 5 7 43.5247 5.42417 19

3 7 5 60.1905 6.66865 19

7 3 -5 54.3618 5.12570 16

3 7 -5 54.0602 6.19699 16

-3 7 -5 42.1877 4.95699 15

-7 3 -5 53.3686 5.58006 15

7 3 5 57.4637 6.24794 17

5 -7 3 52.6440 4.64730 17

5 7 3 40.7708 5.86705 18

-3 5 -7 46.4566 5.44084 15

-7 5 -3 44.3300 5.26330 15

-5 7 3 43.3824 4.37502 17

7 -3 5 47.3763 5.77625 17

7 -5 3 47.4132 5.63244 17

-7 5 3 47.1352 5.42420 17

7 5 3 47.1310 5.26301 17

-5 7 -3 47.3098 5.18589 15

3 7 5 47.2933 4.37056 17

-5 3 -7 51.6745 5.45459 15

3 -7 5 46.1722 4.42297 17

-5 -7 3 53.5073 4.70754 17

7 5 3 47.2312 6.21778 18

-7 -5 3 50.5135 5.61022 17

-7 5 -5 122.560 7.95561 8

-5 7 -5 116.188 7.40305 10

-7 -5 -5 123.834 8.49684 10

-7 5 -5 119.481 8.86277 10

-5 5 -7 121.490 7.03233 7

-5 5 -7 138.882 9.00463 8

-5 5 -7 135.677 8.88745 10

5 -7 -5 137.606 7.61839 5

-7 -5 -5 134.598 9.00635 6

7 5 -5 125.885 8.55642 5

-7 -5 -5 117.414 7.97871 3

5 5 -7 118.458 8.27382 5

5 7 -5 116.004 7.29762 5

5 -5 7 123.372 8.24368 5

-5 7 -5 101.253 6.83129 6

-5 -5 -7 145.113 9.22873 6

7 -5 -5 121.941 8.27566 5

-7 5 -5 120.196 8.47973 6

-5 5 -7 126.828 8.80051 6

5 5 7 131.269 8.53726 5

5 -5 -7 113.430 7.98261 5

5 -7 5 135.995 7.65441 5

5 7 5 127.658 7.43577 5

-5 5 7 120.598 6.67795 4

7 -5 5 126.833 8.34781 1

7 5 5 132.160 8.71035 1

5 7 5 128.409 8.23239 28

-5 5 7 135.051 8.75008 29

-7 5 5 115.198 8.35146 29

5 7 -5 125.990 8.47309 28

-5 7 5 137.548 9.53603 29

-5 7 -5 130.658 7.90251 30

-5 7 5 115.076 7.36261 25

-5 7 5 123.227 7.76190 26

-7 5 5 115.437 8.44704 25

-5 5 7 138.850 9.17386 25

-7 -5 5 138.442 9.01670 25

-5 -5 7 128.811 8.90283 25

-5 5 7 132.880 9.52199 11

-5 -5 7 121.330 9.05077 11

7 -5 -5 116.677 8.87555 12

5 -5 -7 122.138 8.83048 12

5 7 -5 113.672 7.64651 12

-5 7 -5 122.619 7.38419 13

7 5 -5 120.860 9.25972 12

5 5 -7 122.517 9.17063 12

-5 5 -7 133.173 8.29072 23

-7 5 -5 118.981 8.22099 23

-7 5 -5 120.316 9.18811 22

-5 7 5 131.814 7.75862 23

-5 7 -5 129.338 9.66932 22

-5 7 -5 122.220 8.93262 23

-5 5 -7 124.360 9.73352 22

-7 5 -5 128.418 8.67557 20

5 7 5 110.749 9.43582 19

-5 7 -5 131.831 7.82340 21

5 5 7 120.780 8.77931 19

-5 7 -5 133.397 9.74974 20

-5 5 -7 137.183 9.14941 20

7 5 5 130.827 8.99634 19

-7 5 -5 137.827 8.81092 21

-5 5 -7 134.811 9.27891 15

7 -5 5 137.495 9.45952 17

5 -5 7 131.534 9.04427 17

7 5 -5 125.380 8.91813 16

5 7 -5 114.873 9.37663 16

5 5 7 136.641 9.10491 17

7 5 5 139.774 9.35368 17

5 -7 5 120.514 7.87659 17

-5 7 -5 125.736 8.92562 15

-7 5 -5 134.544 7.99270 14

5 7 5 140.688 8.16341 17

-7 5 -5 109.221 8.43151 15

-7 5 5 120.620 9.06475 17

7 5 5 140.881 10.4645 18

7 -7 1 1.96969 2.33391 11

7 7 1 3.05035 2.36455 11

-7 -1 -7 2.26594 2.92291 10

-7 7 -1 2.96686 2.75974 10

-7 1 -7-0.74494 2.88278 8

-7 7 -1 2.61318 2.52815 9

1 -7 7 2.21129 2.01707 4

-1 -7 7 2.48119 2.65379 4

-7 -1 -7 5.41575 3.38430 6

-1 -7 -7 1.65155 1.88315 1

1 -7 -7 0.51353 2.43393 7

1 -7 7-0.70259 1.63404 3

-7 -7 -1 2.43558 1.49565 3

1 -7 7 1.62811 1.78065 5

1 -7 -7 2.52769 1.84299 1

1 7 -7 2.15452 2.19722 2

1 7 7 0.83807 1.66619 5

1 7 -7 5.19850 2.40359 1

7 -7 1 1.97054 1.43813 1

-7 7 -1 1.25377 2.01721 6

7 7 1 5.31749 2.00928 1

-1 7 -7 0.42283 1.76752 1

-7 7 1 9.78776 3.28907 30

1 7 -7-1.13008 2.61672 28

-7 7 -1 2.19716 2.23172 30

-1 7 -7 3.95979 3.18527 27

-1 7 7 2.04101 2.03945 25

-7 -1 7 0.75242 3.14496 25

-1 7 7 1.73130 2.41225 26

1 7 -7 3.81394 2.25392 12

7 -1 -7 2.43726 3.31390 12

-1 7 7 1.54225 2.29724 13

-1 -7 7 0.49482 2.01854 11

1 7 7 1.27893 2.05769 13

7 7 -1 2.56027 2.24000 11

-1 7 7 1.49360 1.92677 11

7 -7 -1 1.47578 2.19824 11

-7 7 -1 3.15785 2.71562 13

-1 7 -7-0.60944 2.77941 22

-1 7 -7 0.62196 2.66089 23

-7 7 1 1.08574 2.26920 24

1 7 -7 0.48991 2.23436 22

-7 7 1 0.62151 2.59784 23

-7 7 -1 1.94126 2.63957 23

1 7 7 3.81897 3.61994 19

-7 7 1 1.10337 2.61474 22

-7 7 -1 0.68045 2.91109 21

-7 7 -1 0.60627 2.65208 22

-7 -7 1 1.79784 2.00851 17

-7 1 -7 0.48471 2.25442 15

7 7 -1 0.82865 3.46358 18

-7 7 1 3.67056 2.13403 17

7 7 1 3.21283 3.51346 18

-1 7 -7 1.76283 2.78500 15

-7 -1 -7 1.50601 1.88111 15

-7 -3 -7 668.356 24.1419 10

-3 -7 -7 674.747 21.5642 8

-7 3 -7 629.265 23.1513 8

-7 7 -3 673.523 23.7265 9

-7 7 -3 658.155 22.0289 10

-7 3 -7 680.644 24.7328 10

-7 -7 -3 682.091 20.0062 3

-3 7 7 637.480 17.4963 4

7 -7 -3 697.339 20.6201 5

3 7 7 659.532 20.1006 5

-7 -7 -3 666.031 20.1849 6

7 7 3 671.431 20.3108 1

3 -7 7 670.100 20.1436 5

3 7 -7 668.144 21.2485 2

3 -7 7 687.847 20.5425 3

-7 7 -3 641.944 20.0738 6

7 7 -3 681.843 20.5209 5

7 -7 3 642.466 19.8320 1

-7 3 -7 680.222 24.3217 6

3 -7 7 659.507 20.9918 4

-7 -3 -7 676.322 24.3963 6

3 7 -7 680.859 20.0066 28

-7 7 3 676.525 24.1106 29

-7 3 7 677.721 20.1403 29

-7 7 3 656.356 22.2410 30

-3 7 7 719.406 24.5321 29

-7 7 -3 649.800 19.3267 30

3 7 7 686.628 20.7846 30

3 7 -7 687.113 24.1209 27

-7 -3 7 692.884 24.4688 25

-7 7 3 657.100 20.4502 25

-3 7 7 678.989 20.7155 25

-3 7 7 645.917 20.4794 26

-7 3 7 672.656 24.3444 25

-3 -7 7 646.344 20.0056 25

-7 -7 3 638.479 20.0520 25

7 -7 -3 682.823 21.0629 12

3 7 -7 675.328 20.8378 12

-3 -7 7 709.643 22.0867 11

7 -7 3 695.102 21.6473 11

-3 7 7 680.686 21.8719 11

7 7 3 657.351 21.2757 11

7 7 -3 668.350 21.1961 12

-7 7 -3 682.772 20.3535 13

7 3 -7 657.721 25.0218 12

3 -7 -7 689.234 20.3638 12

7 -3 -7 647.489 24.3872 12

-3 7 -7 692.303 22.9480 23

-7 3 -7 679.190 19.7873 23

-7 7 3 663.982 22.2305 23

-3 7 -7 684.712 24.2158 22

-7 3 -7 662.023 24.0550 22

-7 7 -3 695.247 23.9480 22

-7 7 3 703.283 22.1610 22

-7 7 3 677.344 21.1825 24

-7 7 -3 734.124 24.4466 20

-3 7 -7 726.880 24.9173 20

7 7 3 650.310 24.1588 19

-7 3 7 670.917 20.9759 21

3 7 7 664.443 24.8288 19

-7 3 -7 676.092 20.0865 20

-7 7 -3 642.495 22.7675 21

-3 7 -7 671.990 23.1012 15

-7 -7 3 683.473 21.3059 17

-7 7 3 653.796 20.9716 17

3 7 7 675.421 20.5401 17

7 7 3 698.934 25.8962 18

-7 7 -3 626.156 20.4466 14

-7 3 -7 650.694 22.1943 15

-5 7 -7 944.285 26.4863 8

-7 7 -5 905.064 27.7982 10

-7 5 -7 892.286 27.9626 8

-5 7 -7 925.746 26.4281 10

-7 5 -7 931.970 29.8356 10

-5 7 -7 924.901 26.8953 6

5 7 7 883.017 25.7372 5

-7 7 -5 916.247 26.7296 6

-7 -7 -5 948.379 26.9189 6

7 7 -5 910.360 26.1938 5

-7 -5 -7 934.496 29.7024 6

-7 5 -7 894.122 29.0342 6

-5 -7 -7 963.413 27.4775 6

5 7 -7 906.621 26.2942 5

-7 5 7 923.684 27.9162 29

5 7 -7 976.837 26.7899 28

-5 7 7 929.031 29.8235 29

-7 7 5 893.359 29.6490 29

5 7 7 986.134 26.1678 28

-7 -7 5 960.121 27.1002 25

-7 7 5 921.537 27.2304 25

-5 7 7 906.515 25.4546 26

-7 -5 7 886.608 28.9627 25

-5 7 7 910.077 26.9956 25

-7 5 7 953.387 29.9477 25

-5 -7 7 889.769 26.4102 25

5 7 -7 936.909 27.7757 12

7 -7 -5 935.625 27.4817 12

7 7 -5 904.551 27.6002 12

5 -7 -7 929.476 27.0934 12

-5 7 7 913.142 27.7117 11

7 5 -7 898.746 30.1968 12

7 -5 -7 916.856 29.8776 12

-7 7 -5 909.151 30.5682 22

-5 7 -7 943.344 31.4064 22

-7 5 -7 893.165 26.7832 23

-7 5 -7 931.776 31.0805 22

-7 7 -5 923.553 29.2514 23

-5 7 -7 904.938 28.4927 23

-7 7 -5 935.543 30.1353 20

7 5 7 978.098 28.7704 19

-7 5 -7 894.118 25.9270 21

-7 7 -5 904.969 27.5119 21

7 7 5 934.184 30.9652 19

-7 5 -7 973.711 28.4634 20

-5 7 -7 943.059 30.5705 20

5 7 7 995.328 31.7239 19

-7 7 -5 891.665 24.8064 14

-7 5 -7 915.659 29.5397 15

-7 7 5 933.936 27.7616 17

5 7 7 917.579 26.8606 17

7 7 5 941.466 27.4165 17

-7 5 -7 936.695 25.1634 14

7 7 -5 886.022 30.1408 16

-7 7 -7 4.29760 3.20125 10

-7 7 -7 1.11878 2.39418 8

-7 7 -7 5.55760 3.35356 6

-7 -7 -7 7.60153 3.51002 6

-7 7 7 5.05009 4.06278 29

7 7 -7 3.90612 3.19840 28

7 7 7 3.63454 2.87175 28

-7 7 7 4.33940 3.29899 25

-7 -7 7 5.46721 3.47120 25

7 7 -7 5.32480 3.32813 12

7 -7 -7 1.44863 3.55831 12

-7 7 -7 6.09095 3.86705 23

7 7 7 1.81423 3.79210 19

-7 7 -7 5.91429 3.32675 21

-7 7 -7 5.05806 4.41749 20

-7 7 -7 2.69585 3.75658 15

-8 0 0 11592.2 228.771 10

0 0 -8 12460.6 229.816 8

8 0 0 12328.8 225.130 3

0 0 8 12275.4 229.011 5

0 0 -8 12245.4 229.778 1

0 0 -8 12304.2 226.078 3

0 8 0 12271.8 223.343 4

0 8 0 12070.5 227.772 30

0 8 0 11999.3 228.008 28

0 8 0 11703.9 226.712 26

0 0 -8 12283.2 229.543 12

0 8 0 12311.7 228.347 13

8 0 0 12192.1 231.812 11

0 8 0 12336.4 227.802 22

0 8 0 12202.2 227.544 24

0 8 0 11990.3 226.283 23

-8 0 0 12261.2 228.467 21

0 8 0 11974.8 228.019 19

0 8 0 12864.0 226.480 20

-8 0 0 12385.4 231.094 17

-8 0 -2 1.11656 2.49452 10

0 -2 -8 1.05264 2.44773 8

8 -2 0 0.64373 2.62572 11

0 8 -2-0.34431 1.63180 9

8 2 0 0.63260 2.51499 11

-2 0 -8-1.15928 2.47970 8

-8 -2 0 0.97000 2.54112 10

2 8 0 1.66253 1.81804 4

8 0 -2-0.92470 2.02239 4

2 0 8-0.52085 1.83987 5

-2 0 -8 0.54862 2.00154 1

0 2 -8 1.08331 2.31720 1

-2 0 -8 0.55712 2.15581 7

0 -2 8 1.51492 2.43712 5

2 -8 0 0.33203 1.17289 2

0 -8 -2 0.17215 0.80063 2

-2 0 -8-0.85108 1.69180 2

8 -2 0 0.40297 1.47018 3

0 2 -8 0.65489 1.26710 3

8 0 -2 0.28290 1.23746 3

0 2 8-1.02292 1.74545 5

-2 0 -8-0.44531 1.46441 3

8 0 2 0.40766 1.62071 3

-8 0 -2 2.39260 2.55888 6

0 -2 -8 1.14297 2.38860 7

2 0 -8 1.08983 2.04920 5

2 8 0 0.50599 2.11485 28

2 8 0 0.47139 1.87409 30

0 8 2-1.34580 2.04578 29

0 8 2 14.2156 3.46314 30

0 8 2 0.47504 2.25134 28

0 8 -2-0.48385 2.06989 28

-2 8 0-0.97059 2.54269 30

-2 8 0 0.45601 2.03754 29

-2 8 0 7.16450 2.72054 26

-8 0 2-0.55826 2.27710 25

0 8 -2 0.42580 1.86254 26

2 8 0 0.41709 1.70128 26

-2 0 8 1.57202 2.34138 25

0 8 2-0.46813 2.04767 26

0 -2 -8 0.53022 2.41798 12

-8 0 2-0.47427 2.11914 14

2 0 -8-0.57224 2.50305 12

-2 0 -8-0.55068 2.35582 12

8 0 -2 1.35799 2.76955 11

0 2 -8-1.07734 2.35622 12

0 8 -2-0.49585 2.43543 13

0 8 -2-1.35791 2.22320 24

-2 8 0 1.00461 2.29070 24

-2 8 0-0.43589 2.02717 23

0 8 -2 2.41403 2.45178 23

2 8 0 2.87870 2.37223 22

0 8 2 1.01884 2.12920 22

0 8 -2 0.92489 2.10891 20

2 8 0-0.56700 2.36985 19

0 8 -2-0.44102 1.97058 19

-2 8 0-0.51077 2.28224 22

0 8 2 1.09451 2.49567 19

-8 2 0 0.53522 2.62881 21

0 8 -2 0.92603 2.23461 22

-8 0 2 0.46324 2.35245 21

-8 0 -2 0.52409 2.90758 21

-2 8 0 2.82059 2.30896 20

-8 2 0 0.59424 2.42383 17

-8 0 2 3.13977 2.36146 17

0 8 -2 0.92113 2.18274 16

-8 -2 0 1.16720 2.38046 17

2 8 0-0.49230 2.05765 18

-2 -2 -8 688.809 22.2785 8

-8 -2 -2 669.026 21.3147 10

-2 2 -8 689.027 21.5175 7

-2 -2 -8 629.894 21.9604 7

2 -2 -8 691.273 22.2656 7

2 -2 -8 700.810 21.5050 8

-2 8 -2 656.905 20.1489 9

-2 2 -8 650.819 21.9839 8

8 -2 -2 698.873 19.4993 3

-2 2 -8 682.989 20.8515 2

2 2 -8 680.744 21.6585 5

-2 2 -8 671.161 21.7065 1

-2 2 -8 721.959 20.1635 3

2 -8 2 666.467 19.1978 2

-2 -2 -8 699.329 19.3571 2

-8 2 -2 675.256 22.3706 6

2 -2 -8 699.168 21.9241 5

-8 -2 -2 676.663 22.2629 6

2 2 -8 664.275 16.9943 3

2 -2 8 691.763 21.4458 5

2 2 8 652.245 21.1545 5

-2 -2 -8 710.716 21.3186 3

2 8 -2 684.939 20.5862 4

8 -2 2 653.798 20.1874 3

2 -8 -2 727.847 18.6013 2

8 -2 -2 699.930 19.0929 4

-2 -2 -8 676.628 21.7211 1

8 2 -2 673.844 21.9851 4

-2 8 -2 691.659 21.3111 30

2 8 -2 679.965 21.4571 30

2 8 2 699.139 21.3501 28

-2 8 2 690.075 21.3054 29

2 8 2 673.366 20.5482 30

2 8 -2 670.671 21.1976 28

2 8 -2 668.619 20.0326 27

-2 -2 8 659.996 21.2741 25

-2 8 2 652.923 20.5999 26

2 8 2 730.237 21.8151 26

-8 -2 2 672.473 21.7475 25

-8 2 2 661.828 21.6652 25

-2 8 -2 709.126 21.6844 24

2 8 -2 675.211 19.4305 26

-2 2 8 652.010 21.2136 25

2 -2 -8 691.217 22.2309 12

8 2 -2 683.231 23.5581 11

-2 -2 -8 672.781 21.6905 12

8 -2 -2 701.648 23.8064 11

2 2 -8 702.537 22.4299 12

-2 8 2 710.042 21.6015 13

-2 8 -2 649.575 20.5960 13

-2 2 -8 671.475 21.8224 12

2 8 2 694.160 21.0066 13

-2 8 -2 722.103 22.0701 22

2 8 -2 694.784 19.6517 22

-2 8 -2 671.044 21.0588 23

-2 8 2 666.544 19.2855 23

-2 8 -2 741.809 22.1836 20

-8 2 2 688.156 21.4322 21

-2 8 2 656.162 20.9767 19

2 8 -2 658.484 20.5778 18

-8 -2 2 697.923 23.0444 17

8 2 2 678.158 20.5941 18

-2 8 -2 670.425 18.6901 15

2 8 2 672.413 21.9101 18

-8 2 2 684.317 22.8186 17

-8 2 2 689.495 21.5172 14

-4 0 -8 2303.41 55.8012 8

-8 0 -4 2417.00 56.1833 10

-8 -4 0 2482.31 52.0668 10

0 -4 -8 2480.95 53.6536 8

0 -4 -8 2466.60 55.7782 7

0 -4 -8 2482.67 54.3065 1

4 0 8 2486.89 55.1450 5

8 0 4 2519.73 52.2072 2

8 -4 0 2366.53 52.8720 3

0 -8 4 2520.29 50.0260 3

8 0 -4 2378.34 48.0894 3

8 0 -4 2435.08 53.5515 4

0 4 8 2411.48 53.7086 5

-4 0 8 2453.29 54.6511 4

4 0 -8 2468.53 55.3717 5

4 -8 0 2329.68 46.2891 1

-8 0 -4 2360.97 56.3376 6

4 8 0 2257.37 45.8705 1

-4 0 -8 2460.72 53.8608 3

0 -4 8 2431.34 53.6387 5

-4 0 -8 2413.51 55.9360 6

0 -4 8 2313.51 54.7139 4

-4 0 -8 2414.49 55.0565 1

-4 0 -8 2469.03 52.3105 2

4 -8 0 2443.31 52.0929 2

8 -4 0 2383.58 47.9727 4

0 4 -8 2392.20 54.1182 1

8 0 4 2527.64 56.3628 1

4 8 0 2497.93 54.7423 4

4 8 0 2343.30 54.6830 28

-4 8 0 2324.66 54.3829 29

-4 8 0 2331.66 53.3986 30

0 4 -8 2470.72 53.5225 27

4 8 0 2386.04 53.1342 30

0 8 4 2446.23 54.4443 30

0 8 -4 2381.06 53.0770 28

0 8 4 2373.57 52.6646 28

-4 0 8 2465.01 55.9738 25

-8 0 4 2338.86 55.6719 25

0 8 -4 2412.47 54.5024 27

4 8 0 2444.19 52.3880 26

0 8 4 2396.54 54.3504 26

0 8 -4 2425.77 53.0530 24

0 -4 -8 2426.46 53.9410 12

0 8 4 2455.52 53.4366 13

8 0 -4 2415.57 57.5222 11

0 -8 4 2269.42 46.9338 11

-4 0 8 2360.37 56.9897 11

0 8 4 2187.73 46.2842 11

8 -4 0 2455.04 56.3150 11

0 4 -8 2426.77 54.3556 12

8 4 0 2297.67 55.2939 11

-4 8 0 2394.51 54.1109 13

4 0 -8 2398.81 56.4688 12

0 4 -8 2389.67 52.8563 22

0 8 -4 2330.13 53.0995 22

0 8 -4 2365.62 54.6757 23

-8 4 0 2411.21 50.5207 22

-4 8 0 2393.14 53.7547 23

-4 8 0 2522.41 55.5000 20

-8 4 0 2415.09 55.3919 21

-8 0 4 2370.28 51.9884 21

-8 0 -4 2456.77 51.0909 15

4 8 0 2359.11 55.8347 18

-8 0 4 2401.15 56.9738 17

-4 0 -8 2348.69 51.2308 15

-8 0 4 2371.77 52.8458 14

8 4 0 2407.21 56.0034 18

-8 4 0 2483.14 55.3088 17

0 8 -4 2416.98 51.0018 15

8 0 4 2395.85 56.4158 17

-8 4 0 2437.04 54.6940 14

0 8 -4 2490.09 54.8381 16

-8 -4 0 2482.36 55.0663 17

-2 -4 -8 20.0981 4.48449 8

2 -4 -8 10.7142 3.07790 8

-2 4 -8 13.1381 3.86266 8

4 8 2 18.2639 2.46817 11

8 -4 2 12.0756 3.58545 11

-4 -2 -8 17.4221 4.20023 8

8 4 2 20.4293 3.96338 11

4 -8 2 11.8679 2.13220 11

-8 4 -2 22.7985 4.57292 10

-8 -4 -2 17.3265 3.61089 10

-8 -2 -4 18.8636 4.12648 10

-4 2 -8 11.1198 3.87753 8

-8 -4 2 21.6386 3.77685 10

-8 4 -2 15.4862 3.46330 9

-2 -4 8 13.5607 3.74077 4

-4 -2 8 18.2887 4.05856 4

8 4 -2 16.0178 3.93112 4

-4 2 -8 22.4653 3.76627 3

2 8 -4 17.8175 2.14148 1

8 -4 2 18.5511 4.14010 1

-2 4 -8 15.6795 3.39352 1

2 -8 -4 16.1663 2.10221 1

4 8 -2 15.6094 2.11053 2

-8 -4 -2 16.6063 2.79107 3

-4 -2 -8 17.1326 2.79699 2

8 2 4 14.4219 3.64740 1

2 8 -4 14.0828 2.74099 2

-2 4 -8 22.8397 3.88493 2

8 -2 4 23.7749 4.42995 1

8 -2 4 16.4343 3.42278 2

-2 -4 -8 9.03543 3.04161 1

2 4 8 13.0192 3.43772 5

4 -8 2 15.9669 2.11725 5

2 4 -8 15.5986 3.44670 5

2 -4 -8 15.7565 3.43363 5

4 -8 2 12.8474 2.97377 2

4 8 2 21.1340 2.20838 5

-8 -2 -4 13.8917 3.25351 3

-4 2 -8 21.4123 4.38436 6

8 2 4 13.9091 2.49763 2

4 -2 8 17.9039 3.79592 5

4 2 -8 15.9345 1.72674 3

4 2 8 21.1403 3.87591 5

8 4 2 12.0534 3.03731 1

4 2 -8 16.9687 3.67053 5

4 -2 -8 15.1766 3.54371 5

8 -4 2 16.2783 3.51522 3

4 -8 -2 18.5264 2.11758 5

2 -4 8 16.4657 3.36444 5

-2 -4 -8 20.3021 2.75036 2

-4 2 -8 12.2420 3.77539 7

-4 2 -8 20.5140 4.04667 1

-4 -2 -8 15.5680 4.29812 6

2 -8 4 19.1136 2.09205 5

2 8 4 20.9095 2.16404 5

-4 -2 -8 19.0648 3.46777 1

8 -2 4 11.9848 3.02019 3

4 8 -2 21.7209 2.22880 5

-2 -8 4 12.1529 1.89802 3

-8 -4 -2 20.2922 4.24060 6

-8 4 -2 14.7624 4.04105 6

2 -8 4 13.4040 2.89934 3

2 -4 -8 13.0241 3.79109 7

-4 2 -8 26.9710 3.82271 2

-8 -2 -4 13.9279 3.88451 6

-8 2 -4 20.6550 4.26408 6

8 2 -4 16.4051 3.75221 4

-4 2 8 16.2004 3.67681 4

4 8 -2 14.2163 3.67921 4

4 8 -2 15.8816 3.81534 30

2 8 -4 23.4435 4.01454 28

2 8 -4 19.7814 4.55512 30

-4 8 -2 14.2717 3.64277 30

2 8 4 11.6149 3.33440 30

4 8 2 11.7986 3.13862 30

-4 8 2 16.1215 3.79826 30

4 8 -2 17.5485 3.93154 28

-2 8 4 12.4950 3.52927 30

-2 8 -4 13.6495 3.75210 30

4 8 2 18.8400 4.11060 28

2 8 4 21.9188 3.97186 28

-8 4 2 17.4638 4.05646 25

4 8 -2 13.9782 2.82746 26

2 8 -4 19.8506 4.21801 27

-2 -4 8 21.0994 4.06452 25

-2 4 -8 14.2868 3.26922 27

-8 -2 4 19.6136 4.44226 25

-8 -4 2 18.0761 4.06938 25

-4 8 2 14.4869 3.50718 26

-4 2 8 14.4250 4.01499 25

-4 -2 8 22.9635 4.53804 25

4 8 -2 14.3780 3.11761 27

-2 4 8 13.4450 3.71496 25

-2 8 4 18.6559 3.87999 26

-8 2 4 13.3757 3.86467 25

4 -2 -8 13.1836 3.86089 12

-2 -4 8 15.4476 3.79198 11

4 2 -8 12.0153 4.31505 12

8 4 -2 11.1347 4.01820 11

8 -4 -2 16.1917 4.26988 11

2 4 -8 13.2226 4.03830 12

8 2 -4 15.0479 4.44240 11

-8 -2 4 15.8484 3.37355 14

2 -4 -8 14.8700 3.80378 12

2 8 4 18.8021 3.64970 13

-2 -4 -8 13.4725 3.48797 12

-8 4 -2 16.8117 3.74592 14

-4 2 8 11.8907 3.83901 11

8 -2 -4 14.7527 4.01221 11

-8 4 2 15.0421 3.89157 14

-4 -2 8 17.4109 4.50117 11

-2 8 4 20.0223 4.06882 13

-4 8 -2 20.3245 3.76719 13

-8 2 4 16.2736 3.80712 14

-2 4 8 22.3802 4.09933 11

-2 4 -8 13.9061 3.87492 12

-8 4 -2 14.9120 3.23239 22

-2 8 4 12.0932 2.69903 23

-2 4 -8 22.6979 4.48245 22

2 8 -4 12.0501 3.01313 24

-4 8 2 20.3849 4.21449 24

2 4 -8 18.0323 3.19780 22

-4 8 -2 13.7513 3.88678 23

-4 8 -2 22.1954 4.45462 24

-2 4 -8 14.0092 2.81015 23

-4 8 2 18.2915 3.64167 23

-8 4 -2 19.4021 4.15238 23

-8 2 -4 15.6298 3.46322 22

-8 2 -4 22.0920 3.67810 23

-2 8 -4 17.5631 4.11197 22

-2 8 4 15.2202 3.97628 19

-2 8 -4 21.4076 4.38340 20

-8 4 -2 17.5204 4.20682 21

-8 4 2 16.6308 3.82163 21

-4 8 2 17.8156 4.20363 22

-8 2 -4 19.0207 3.97987 21

4 8 2 21.2498 4.62303 19

-4 8 -2 16.0056 3.86049 20

2 8 4 21.1550 4.77887 19

-8 2 4 19.4399 3.99742 21

2 8 -4 14.1170 3.11371 22

-8 2 -4 30.3485 4.33498 15

-4 2 -8 37.3149 4.55431 15

-2 8 -4 17.1052 3.61462 15

-8 -4 2 13.2979 3.75066 17

-4 8 -2 15.2494 3.27794 15

-8 2 4 27.8634 4.85002 17

4 8 -2 14.2081 4.04893 18

8 2 4 17.3697 3.79683 18

-8 4 2 14.7829 3.94354 17

4 8 2 22.5984 4.84695 18

8 4 2 15.4661 4.30724 18

-8 -2 4 16.9720 4.16404 17

8 2 4 30.8387 4.90050 17

-2 4 -8 16.8820 3.76149 15

2 8 4 15.0586 2.14815 17

2 8 -4 21.0896 4.04650 18

8 -2 4 17.8034 4.00010 17

-4 -8 2 14.7692 2.03819 17

-4 8 2 18.0154 2.24440 17

2 -8 4 14.7151 2.24326 17

-4 4 -8 7224.95 142.081 7

-8 -4 -4 7283.95 143.722 10

-4 4 -8 7431.96 145.926 8

-4 -4 -8 7297.83 146.482 8

-8 4 -4 7521.26 147.408 10

4 8 -4 7336.01 139.014 2

4 -8 4 7603.56 142.942 3

8 -4 4 7503.88 144.854 1

-8 -4 -4 7565.03 142.025 3

4 8 -4 7151.46 137.421 5

4 -4 -8 7584.93 144.369 5

4 -4 8 7355.09 143.597 5

4 4 8 7559.68 144.322 5

4 8 4 7110.87 137.199 5

-8 4 -4 7295.23 145.566 6

4 4 -8 7321.51 144.222 5

-8 -4 -4 7421.02 145.762 6

-4 -4 -8 7454.12 145.390 6

-4 4 -8 7351.12 145.366 6

-4 4 8 7266.29 140.760 4

8 4 4 7452.40 144.337 1

4 8 -4 7380.29 144.083 27

4 8 4 7458.70 143.955 28

4 8 -4 7058.94 145.338 30

-4 8 4 7595.77 146.815 29

4 8 4 7369.98 141.523 30

-4 8 -4 7381.43 143.588 30

4 8 -4 7349.14 144.511 28

-4 8 4 7296.26 143.460 26

-4 -4 8 7384.77 145.220 25

-4 4 8 7639.61 145.868 25

-8 4 4 7383.74 145.414 25

-8 -4 4 7182.06 144.689 25

-4 -4 8 7188.94 146.542 11

-4 4 8 7385.31 146.745 11

4 4 -8 7313.58 145.927 12

4 -4 -8 7195.03 145.362 12

-8 4 -4 7469.63 143.495 14

-4 8 -4 7233.97 141.895 13

-4 4 -8 7344.91 140.134 23

-4 8 -4 7452.70 146.686 22

-8 4 -4 7201.60 144.316 22

-4 4 -8 7445.54 147.090 22

-4 8 4 7425.23 140.814 23

-8 4 -4 7392.67 143.270 23

-4 8 -4 7265.35 141.151 21

-8 4 -4 7468.83 145.264 21

4 4 8 7204.52 142.883 19

8 4 4 7438.27 143.320 19

-8 4 4 7329.27 145.344 21

4 8 4 7419.81 148.796 19

-4 4 -8 7377.40 144.661 15

-8 4 4 7391.02 146.220 17

8 4 4 7685.08 147.472 18

4 8 4 7207.56 138.212 17

-8 -4 4 7532.34 140.333 14

-8 4 -4 7356.74 144.418 15

-4 8 -4 7413.07 143.892 15

-4 8 4 7188.77 138.263 17

8 4 4 7423.84 146.059 17

4 8 -4 7437.65 147.676 16

-8 -4 4 7230.15 145.683 17

8 4 -4 7317.88 142.627 16

8 -4 4 7353.49 145.895 17

-8 6 0 0.61756 2.70130 9

0 -6 -8 1.86029 2.16289 8

-6 0 -8-0.76234 2.94995 10

-8 6 0 0.70112 2.63659 10

-6 8 0-1.02273 2.23676 10

-8 0 -6 1.55215 2.91847 10

-8 0 -6-2.40693 3.58489 6

6 8 0-0.30657 1.31149 1

-6 0 -8-0.76637 3.42429 6

0 6 -8 2.05598 2.09653 1

0 -6 -8 5.77177 3.69933 7

0 -8 -6-0.93509 2.29642 7

0 8 -6-0.51475 1.69276 2

-8 -6 0 0.54621 2.44057 6

0 -6 -8-1.00173 2.04297 1

-8 6 0 1.66685 2.53380 6

0 8 -6 0.31484 1.37717 1

-6 8 0-1.65933 2.62132 30

0 8 -6-1.40021 3.37884 30

0 8 6 0.62416 2.78886 30

6 8 0-0.98066 2.19089 30

-8 6 0-0.79909 1.85814 30

0 6 -8-1.30168 3.14108 27

0 6 8-0.49329 2.29411 25

0 -6 8 0.48346 2.49438 25

-8 0 6 4.61035 3.96446 25

0 8 6-0.65933 2.68935 26

0 8 -6 0.68713 2.50683 27

-6 0 8-0.76413 3.19375 25

6 0 -8 2.45178 3.87319 12

0 8 6-0.52717 2.30590 13

8 -6 0-0.59713 2.61193 11

0 8 6 0.37238 1.51888 11

-8 6 0-0.63090 2.93409 14

8 6 0-0.60251 2.57751 11

0 6 8-0.41763 2.08629 13

0 6 -8-0.53068 2.78047 12

0 -6 -8 1.00417 2.24341 12

8 0 -6 4.24647 3.87306 12

-6 8 0 1.22233 3.05312 13

6 8 0 1.53608 1.67975 11

0 6 -8-1.12061 2.39698 22

-6 8 0 0.63562 2.45957 24

0 6 -8 1.75983 2.50950 23

-8 6 0 1.31036 2.92748 23

0 8 -6-0.68487 3.06013 23

0 8 -6-0.56479 2.57565 22

-6 8 0-2.55289 3.18830 23

-6 8 0 1.91261 3.07689 22

-8 0 6 0.40644 2.06398 21

0 8 6 0.79109 3.22676 19

-8 6 0-1.53800 2.14275 22

0 8 -6 0.52072 2.37465 15

8 6 0 2.43704 3.62972 18

-6 0 -8 0.89194 1.90785 15

-8 0 -6-3.06021 2.35892 15

-8 6 -2 371.668 15.8688 9

-6 8 -2 343.269 16.0397 9

-6 2 -8 359.162 16.9297 8

-2 -6 -8 338.948 14.6216 8

-8 6 -2 352.590 16.1541 10

2 -6 -8 338.427 14.8961 7

-6 -2 -8 351.309 17.3814 8

-6 8 -2 335.653 13.5031 10

-8 -2 -6 361.534 16.8938 10

-6 2 -8 334.704 16.3542 10

6 8 -2 347.309 9.96370 2

-8 6 -2 350.903 14.6953 6

2 -6 8 372.622 14.4325 5

2 6 8 350.227 14.1969 5

-8 -6 -2 365.468 12.6508 3

-8 -6 -2 341.239 14.3577 6

-8 -2 -6 364.802 17.4827 6

-8 2 -6 351.373 17.1435 6

2 8 6 347.823 11.9506 5

6 8 -2 365.504 12.2057 5

-6 -8 -2 376.421 12.9481 3

-6 -2 -8 365.690 17.0127 6

-6 2 -8 344.684 16.6850 6

2 -6 8 338.735 14.7715 4

6 8 2 362.834 12.2742 1

2 8 -6 336.723 11.9771 1

-2 6 -8 359.692 14.4186 1

-2 -6 -8 368.229 14.3801 1

8 -6 2 336.866 13.8391 1

8 6 2 354.369 14.2276 1

2 -8 6 346.995 13.9493 4

2 -8 6 355.711 13.2068 3

2 8 -6 370.761 14.2045 2

6 8 2 365.007 13.4985 30

2 8 6 354.446 13.8940 28

6 8 -2 362.643 13.7375 27

6 8 -2 348.112 14.8637 30

-2 8 6 355.589 16.6438 29

-6 8 2 359.266 16.6774 29

-8 6 2 349.598 13.9818 30

-2 8 -6 332.195 15.2998 30

-6 8 -2 370.084 14.5230 30

2 8 6 376.146 15.1155 30

2 8 -6 352.380 14.1875 28

-6 8 2 375.775 15.9017 30

6 8 -2 370.928 12.4130 26

-6 2 8 352.636 16.8361 25

-2 8 6 371.731 15.1846 26

-8 -2 6 359.375 16.8551 25

-2 6 8 376.697 14.1415 26

-2 6 8 384.977 15.0618 25

-6 8 2 366.481 15.3967 24

2 8 -6 367.896 13.4607 24

2 8 -6 376.102 16.5953 27

-8 2 6 339.689 16.6082 25

-2 -6 8 355.612 14.4358 25

-8 6 2 368.676 13.8448 24

-2 6 -8 351.996 15.4925 27

-6 -2 8 358.337 16.9411 25

-2 -6 8 352.910 15.2989 11

-2 6 8 343.913 15.0633 11

8 -6 -2 373.382 15.6425 11

8 -6 2 350.595 15.2833 11

-2 8 6 367.550 15.5655 13

-8 6 -2 342.951 13.3235 13

8 2 -6 359.379 17.7588 12

-2 8 6 339.167 12.9090 11

8 6 -2 359.644 15.7192 11

-6 8 -2 350.697 14.5328 13

8 6 2 333.945 15.0223 11

8 -2 -6 341.658 17.3379 12

6 2 -8 345.848 17.3043 12

2 -6 -8 365.524 14.7003 12

2 6 -8 390.908 15.5578 12

2 8 6 336.527 13.6066 13

6 -2 -8 327.063 16.5991 12

6 8 2 360.055 13.1072 11

-8 2 -6 366.274 13.1199 23

-6 8 2 369.445 15.5849 22

-2 6 -8 345.522 14.6808 23

-6 8 -2 347.994 16.1277 22

-8 6 2 363.757 15.9231 23

-6 8 2 356.707 15.2716 23

2 8 -6 369.379 13.9596 22

-8 2 -6 348.758 15.6438 22

-2 6 -8 364.263 16.3364 22

-2 8 -6 369.671 16.3690 22

-2 8 -6 353.874 15.8571 23

-6 8 -2 355.001 16.0216 23

2 6 -8 366.303 13.5416 22

-8 6 -2 358.813 15.2487 22

-8 6 2 390.497 14.4778 22

-6 8 -2 356.262 15.9261 21

-6 2 -8 355.643 12.7892 20

6 8 2 326.228 16.8783 19

-2 8 -6 371.436 17.2347 20

-8 6 -2 364.983 16.3616 21

-8 6 2 363.169 16.8551 21

2 8 6 335.826 17.1078 19

-8 2 6 362.447 14.3203 21

-6 8 2 344.370 12.2980 17

-8 -6 2 389.647 15.5939 17

8 6 -2 349.886 17.8779 18

6 8 -2 347.674 17.4240 18

-8 2 -6 339.880 14.5249 15

8 6 2 377.851 17.7350 18

-8 6 -2 340.370 14.8160 14

6 8 2 365.429 17.8494 18

-6 8 -2 369.000 15.6914 15

-6 2 -8 347.081 14.6824 15

-8 -2 6 363.020 13.4495 14

-8 6 2 347.939 14.8878 17

-2 8 -6 348.365 15.0439 15

2 8 6 352.508 12.1731 17

-6 4 -8 11.8071 4.31199 10

-8 4 -6 2.44297 3.48656 10

-8 6 -4 5.85026 3.77568 10

-8 -6 -4 8.78299 3.16421 10

-8 4 -6 5.28796 3.56947 8

-8 -4 -6 7.93525 4.05838 10

-4 -6 -8 10.0034 3.85811 8

-6 8 -4 8.70928 2.99644 10

-6 4 -8 3.69554 3.37358 8

-4 8 6 10.0022 2.88508 11

-6 -4 -8 7.04666 4.32866 8

-4 6 -8 6.94705 3.36173 8

-6 8 -4 6.99251 3.61609 9

-8 -4 -6 10.8745 4.48289 6

-8 4 -6 7.67436 3.77204 6

8 -6 -4 9.53403 3.39595 5

-6 -4 -8 12.9333 4.27975 6

-6 4 -8 11.9914 4.21615 6

4 -6 -8 7.10494 2.82338 5

-6 4 -8 1.58070 2.63601 7

6 8 4 6.60062 2.18763 5

4 8 -6 12.8118 2.85557 5

4 6 -8 3.98018 2.69847 5

4 8 -6 8.89336 2.89895 2

6 8 -4 11.8524 2.37667 2

4 8 6 12.7367 2.86337 5

6 8 -4 8.73700 2.46077 5

-8 -6 -4 7.14255 2.64556 3

8 6 -4 10.8209 3.28831 5

-6 -8 -4 10.6557 2.99954 3

-8 -6 -4 8.64288 3.47386 6

-8 6 -4 6.22171 3.05918 6

-4 8 -6 19.5589 4.32696 30

4 8 6 8.73613 3.23051 28

4 8 6 4.90108 2.93470 30

-6 4 8 9.66870 3.36171 29

-8 4 6 13.0239 3.63986 29

-4 6 8 6.23271 3.57585 29

-6 8 -4 13.3582 3.60217 30

-6 8 4 15.8132 4.73093 29

-6 8 4 6.57963 3.53116 30

4 8 -6 6.42515 3.01700 28

-4 8 6 9.35669 4.14918 29

-8 4 6 11.4709 4.00926 25

-6 4 8 6.09197 4.33970 25

-4 6 8 6.90168 2.54251 26

4 8 -6 7.33726 3.48021 27

-8 -4 6 9.63740 3.82753 25

-6 -4 8 12.6812 4.35874 25

-4 -6 8 7.23203 3.34656 25

-4 8 6 3.96884 2.92873 26

-8 6 4 4.44064 2.95369 25

-4 6 8 8.11327 3.60286 25

-8 -6 4 10.8863 3.78434 25

8 4 -6 8.45420 4.08264 12

8 6 -4 4.15713 3.57756 12

6 -4 -8 3.95743 3.61224 12

-8 6 -4 7.73714 3.26975 14

8 -6 -4 7.97868 4.02508 12

4 -6 -8 6.15353 3.02573 12

6 4 -8 8.18735 4.16011 12

-6 8 -4 7.89227 2.98763 13

8 -4 -6 8.14316 4.07048 12

4 6 -8 12.5370 4.08423 12

-8 4 -6 9.71920 3.51985 23

-6 8 4 4.55409 3.24555 23

-6 8 -4 6.63281 4.09115 23

-4 6 -8 10.5353 3.37922 23

-6 4 -8 5.00090 2.38622 23

-4 8 -6 12.0409 4.39515 22

-8 4 -6 10.6358 4.21715 22

-4 6 -8 9.84327 4.42836 22

-8 6 -4 8.87199 3.88980 23

-8 6 -4 8.75591 4.10487 22

-4 8 -6 7.19576 3.82950 23

4 8 6 8.01421 4.06332 19

-8 4 -6 4.17744 2.43263 20

-8 4 -6 15.3456 4.22916 21

8 4 6 8.27981 3.22678 19

-6 8 -4 10.1683 3.66234 21

-6 4 -8 5.58753 3.10316 20

-8 6 -4 6.13877 3.63026 20

-8 6 -4 10.1911 3.87243 21

-4 6 -8 6.61386 3.91080 20

-6 8 -4 7.92191 4.15306 20

6 4 8 10.1444 3.48056 19

6 8 4 8.71769 4.70609 19

-8 4 6 7.80016 3.45983 21

-8 6 4 4.71625 4.05801 21

8 6 4 5.15491 3.61979 19

4 6 8 8.27167 4.23023 19

6 8 4 2.81794 3.83399 18

4 8 -6 12.7275 4.38007 16

-6 8 -4 8.42760 3.89887 15

8 6 -4 10.6168 4.33279 16

-4 6 -8 8.71127 4.24192 15

-8 4 -6 12.9697 3.94018 15

-6 4 -8 4.13345 3.01672 15

4 6 8 11.6282 3.35682 17

8 6 4 7.91878 3.93398 18

-4 8 -6 4.85596 3.46840 15

4 8 6 12.5725 3.04055 17

-6 8 4 5.43651 2.15178 17

6 8 -4 8.37935 4.39260 16

-8 6 -4 6.55636 3.76125 15

-6 -6 -8 367.133 18.6023 8

-8 6 -6 389.278 17.9860 10

-8 6 -6 348.020 14.8382 8

-6 8 -6 344.716 14.4695 10

-6 6 -8 351.795 16.2670 10

-6 6 -8 346.374 16.0065 8

-8 -6 -6 344.784 16.2609 6

-8 6 -6 348.437 16.4803 6

-6 8 -6 328.003 13.8160 6

-6 -6 -8 356.428 16.7079 6

-6 6 -8 350.641 16.4941 6

-8 6 6 377.474 17.0909 29

6 6 -8 387.910 14.3680 28

-6 8 -6 357.090 14.5126 30

6 8 6 341.567 15.5058 28

-6 8 6 372.973 18.2354 29

6 8 -6 361.902 16.2235 28

-6 6 8 331.126 16.0823 29

-6 -6 8 352.469 16.5366 25

-8 6 6 379.268 17.3551 25

-6 8 6 341.424 14.3568 25

-6 6 8 347.763 16.5923 25

-8 -6 6 351.971 16.4258 25

-6 8 6 346.191 14.7874 26

8 6 -6 329.713 16.9452 12

6 6 -8 366.145 17.4896 12

8 -6 -6 364.135 17.2802 12

6 8 -6 339.885 14.6061 12

6 -6 -8 344.129 16.7642 12

-6 8 -6 354.735 17.2844 23

-6 6 -8 373.752 19.0205 22

-6 6 -8 361.375 15.7539 23

-6 8 -6 305.560 17.5321 22

-8 6 -6 344.498 17.9918 22

-8 6 -6 385.766 16.8122 23

-6 6 -8 382.265 17.3639 20

-8 6 -6 380.389 17.0031 20

6 6 8 377.281 17.5847 19

-6 8 -6 409.124 19.1333 20

6 8 6 380.623 19.1710 19

-6 8 -6 333.628 14.1530 21

-8 6 6 367.435 17.6169 21

-8 6 -6 366.172 16.0844 21

8 6 6 425.192 18.4600 19

-6 8 -6 373.331 17.7805 15

-6 6 -8 363.667 17.8308 15

6 8 -6 350.870 18.6381 16

-8 6 -6 366.352 17.9677 15

-8 6 -6 359.436 14.6098 14

8 6 -6 329.723 16.6035 16

-8 8 0 5110.56 107.858 9

-8 8 0 5006.94 106.096 10

0 -8 -8 4891.36 104.154 7

-8 0 -8 5252.49 111.390 10

-8 0 -8 4853.68 110.632 8

-8 8 0 4893.89 100.317 6

-8 0 -8 5163.43 111.330 6

-8 8 0 5123.15 102.981 30

0 8 8 4947.98 100.090 25

-8 8 0 4990.72 105.556 24

-8 0 8 5091.84 110.733 25

-8 8 0 5130.20 105.902 13

0 8 8 5068.08 102.824 13

8 0 -8 5082.65 112.216 12

0 8 -8 5104.27 105.192 22

-8 8 0 5137.49 105.751 22

0 8 -8 5006.79 107.433 23

-8 8 0 5106.08 107.515 23

-8 8 0 5006.36 109.285 21

0 8 -8 5044.07 105.610 15

-8 0 -8 5179.31 101.875 15

8 8 0 4993.35 111.655 18

-8 8 -2 26.0838 5.81822 9

-8 -2 -8 30.2146 6.23272 10

-8 2 -8 37.7019 6.96286 10

-8 2 -8 29.2855 5.92605 8

-8 8 -2 29.0496 5.54683 10

-8 -2 -8 30.1143 6.47206 6

-8 2 -8 22.0948 5.70302 6

2 -8 -8 30.7511 5.23889 7

-8 8 -2 26.1291 4.36866 6

2 8 8 31.0863 5.30986 30

-8 8 2 32.7265 5.44710 30

2 8 -8 28.8921 4.15153 28

-8 8 -2 25.3268 4.42337 30

-2 8 8 27.8036 4.88522 26

-8 -2 8 34.5855 6.51450 25

2 8 -8 34.9765 6.20037 27

-2 8 8 33.1358 4.69608 25

-8 2 8 38.6569 7.16293 25

8 8 -2 25.2537 4.56518 12

-8 8 -2 27.9703 5.14050 13

8 -2 -8 20.1640 6.05321 12

8 2 -8 32.0335 6.68543 12

2 8 -8 36.7698 4.80232 12

-2 8 8 26.8694 5.09390 13

-8 8 2 15.3996 4.48849 24

-8 8 2 36.8302 6.04349 23

2 8 -8 33.5311 5.07270 22

-2 8 -8 30.2112 5.88793 22

-8 2 -8 32.1962 6.22132 22

-2 8 -8 34.7431 6.03989 23

-8 8 2 31.0699 5.70437 22

2 8 8 35.4044 6.85179 19

-8 8 -2 37.6750 6.31918 21

-8 8 2 30.8339 6.45584 21

-8 8 -2 29.5670 5.57603 22

8 8 2 27.7691 5.75154 19

-8 2 -8 26.2929 5.35507 15

-2 8 -8 38.4334 6.13486 15

8 8 2 34.6813 7.16581 18

8 8 -2 35.2039 7.03633 18

-8 8 -4 1138.30 33.9619 10

-8 4 -8 1138.72 31.9337 7

-4 -8 -8 1215.58 34.5080 8

-8 4 -8 1127.71 37.5605 10

-8 8 -4 1267.99 38.2777 9

-8 4 -8 1191.33 36.6412 8

-8 8 -4 1155.99 31.7152 6

-8 -4 -8 1254.34 38.3961 6

-8 4 -8 1155.83 37.1766 6

-4 8 8 1205.93 37.3600 29

4 8 -8 1200.47 31.4990 28

4 8 8 1171.76 31.5669 30

-8 8 4 1210.78 35.9474 30

4 8 -8 1117.66 36.8885 27

-8 4 8 1259.36 32.7741 29

-8 -4 8 1213.89 37.7332 25

-4 8 8 1210.61 32.4031 25

-4 8 8 1183.66 32.3667 26

-8 4 8 1196.39 37.8547 25

8 -4 -8 1093.15 37.3413 12

8 4 -8 1131.19 38.0779 12

-8 8 -4 1176.49 31.2091 13

8 8 -4 1175.11 32.7748 12

4 8 -8 1189.66 32.5859 12

-8 4 -8 1181.65 31.4285 23

-8 4 -8 1146.97 37.5274 22

-8 8 -4 1147.86 37.0386 22

-8 8 -4 1207.44 36.9447 23

-4 8 -8 1183.88 35.6634 23

-4 8 -8 1184.38 38.1105 22

-4 8 -8 1260.38 38.7593 20

-8 4 8 1236.32 33.9053 21

4 8 8 1283.75 39.8906 19

8 8 4 1164.26 37.9097 19

-8 4 -8 1188.76 32.1831 20

-8 8 -4 1231.86 35.9990 21

-8 4 -8 1096.98 35.0426 15

8 8 4 1187.69 40.1042 18

-4 8 -8 1191.08 36.7230 15

8 8 -4 1178.96 37.7558 16

-8 6 -8 26.5152 6.08179 10

-8 8 -6 24.2350 5.62331 10

-6 -8 -8 23.1456 5.80031 8

-8 6 -8 18.9479 5.23149 8

-6 8 -8 22.2950 4.45973 8

-8 8 -6 24.4574 5.57009 6

-8 -6 -8 19.4563 5.30166 6

-8 6 -8 20.3665 5.36944 6

6 8 -8 18.1722 4.33006 28

-8 6 8 13.4190 4.73481 29

8 8 6 13.2765 4.79193 28

-6 8 8 25.8891 5.94245 29

8 8 -6 23.1134 5.44122 28

-8 8 6 26.1693 6.38491 29

-8 8 6 12.3372 4.11518 25

-8 -6 8 21.7176 5.72490 25

-6 8 8 21.7188 4.96545 25

-8 6 8 16.3877 5.32926 25

8 6 -8 15.5720 5.55529 12

8 8 -6 18.7173 4.92679 12

6 8 -8 17.8242 4.70313 12

8 -6 -8 14.9200 5.11583 12

-6 8 -8 28.0489 5.76060 23

-8 8 -6 26.8220 5.89141 23

-8 6 -8 20.5910 5.85888 22

-8 8 -6 27.5374 6.70240 22

-6 8 -8 18.6994 6.03031 22

-8 6 -8 14.2131 4.31464 23

6 8 8 27.4825 6.54865 19

8 6 8 20.4550 5.39347 19

-6 8 -8 23.9784 6.25767 20

-8 6 -8 14.9227 4.92431 20

-8 8 -6 21.9923 5.86145 20

-8 6 8 29.0546 5.82692 21

-8 8 -6 21.1778 4.78862 21

8 8 6 22.4139 6.03293 19

-8 6 -8 25.0807 5.97817 15

8 8 -6 25.5801 6.33981 16

-8 8 -8 2841.30 68.3493 10

-8 -8 -8 2878.50 67.2382 6

-8 8 -8 2843.46 67.9160 6

-8 8 8 2796.80 71.6077 29

8 8 8 2887.49 65.6962 28

8 8 -8 2965.59 67.1831 28

-8 8 8 2818.54 67.8989 25

-8 -8 8 2834.49 67.3751 25

8 -8 -8 2828.26 67.9260 12

8 8 -8 2945.65 69.2681 12

-8 8 -8 2900.38 70.1363 23

-8 8 8 2798.19 71.6828 21

-8 8 -8 3006.13 72.8623 20

8 8 8 3160.93 74.3920 19

-8 8 -8 2866.55 73.7228 15

1 -1 -9 337.726 15.4883 7

1 9 -1 337.546 11.7451 9

-1 -1 -9 343.328 15.6682 8

1 -1 -9 361.900 15.7539 8

1 1 -9 373.624 16.2719 8

-9 -1 -1 355.733 15.4093 10

-1 -1 -9 354.405 15.8652 7

-1 1 -9 361.182 15.5945 7

-9 1 -1 389.511 16.4327 10

-1 1 -9 331.239 15.5183 8

-1 9 -1 351.302 13.2327 9

-1 -1 9 331.359 14.5266 5

9 -1 -1 342.359 12.4158 3

1 -9 -1 337.662 11.0154 2

9 -1 1 360.641 13.3696 3

-1 1 -9 363.765 14.3067 2

1 -1 9 359.404 14.8624 5

-1 -1 -9 355.819 13.9243 3

9 1 -1 374.770 11.9321 3

-1 -1 -9 365.288 15.4588 1

1 9 -1 381.166 13.0056 4

1 1 -9 332.446 12.0182 3

1 9 1 347.836 12.2053 4

9 -1 -1 347.210 13.5228 4

-1 1 -9 358.337 13.1888 3

-1 1 -9 341.438 11.8820 27

-1 9 1 345.356 14.7888 30

1 9 1 328.823 14.6271 28

-1 9 1 358.899 14.3662 29

1 9 1 356.489 14.8510 30

1 9 1 355.695 13.3978 29

1 9 -1 364.567 15.1067 30

-1 9 -1 345.348 13.5104 29

1 9 -1 335.632 12.2380 29

-1 9 1 318.918 14.3755 28

-1 9 -1 335.968 14.5773 24

1 9 -1 333.263 13.7129 26

-1 9 -1 357.260 14.5593 26

1 9 1 343.450 14.2250 26

-1 9 1 358.365 15.0074 13

9 -1 1 347.160 16.2514 11

1 9 -1 361.802 15.2581 13

-1 -1 -9 370.581 16.0382 12

1 -1 -9 327.991 15.4231 12

9 -1 -1 344.392 16.3862 11

1 9 1 348.504 14.8010 13

-1 9 1 339.774 14.8006 22

-1 9 -1 345.919 14.3186 23

-1 9 -1 351.170 14.9575 22

1 9 -1 342.167 14.1429 22

-1 9 1 328.630 13.2074 23

1 9 -1 347.145 14.3494 23

1 9 1 339.390 14.3805 22

1 9 1 331.303 12.9604 23

-9 -1 1 388.900 15.4401 21

1 9 -1 354.189 13.6546 20

1 9 -1 326.705 14.8404 19

-1 9 1 383.013 15.3490 19

-1 9 -1 357.940 14.6122 20

-1 9 1 366.032 14.0575 20

-1 9 -1 332.812 13.7374 19

-9 1 1 361.012 15.2348 21

1 9 1 337.092 15.3358 19

-9 1 -1 399.737 16.2046 21

1 9 1 353.802 12.6354 20

1 9 -1 345.482 13.6902 18

-1 9 -1 334.010 13.3775 16

9 1 1 327.600 13.3140 18

1 9 1 346.639 14.4029 18

-9 -1 1 344.038 15.7174 17

-9 -1 -1 357.360 15.6541 17

-9 1 1 335.885 14.7654 14

-9 -3 1 2163.10 49.9769 10

-1 3 -9 2141.01 52.3986 8

-3 1 -9 2221.46 52.3589 7

1 -3 -9 2222.90 53.0527 7

-1 9 -3 2160.63 48.7503 9

-9 1 -3 2153.63 52.9787 10

-9 -3 -1 2081.95 50.0049 10

-9 -1 -3 2101.84 51.9344 10

-1 -3 -9 2166.46 53.0274 7

-1 -3 -9 2140.90 51.6057 8

-3 -1 -9 2200.98 53.3202 8

1 -3 -9 2157.80 50.8673 8

-9 3 -1 2147.86 47.2763 9

-3 9 -1 2010.89 49.4359 9

9 -3 1 2237.31 49.1777 3

-3 -1 -9 2171.28 47.8832 2

1 3 -9 2160.68 44.8890 3

9 -3 -1 2162.02 48.2364 3

-1 3 -9 2187.53 50.2272 2

9 -1 -3 2132.69 45.5870 3

3 -9 1 2188.11 47.6171 2

-1 3 -9 2118.63 50.7517 1

-3 1 -9 2191.28 49.0382 3

-1 -3 -9 2156.89 50.8130 1

9 1 -3 2138.95 43.5357 3

-9 -3 -1 2025.59 51.5741 6

-9 3 -1 2130.65 52.5345 6

-3 -1 -9 2233.28 50.1279 3

-9 -1 -3 2067.91 52.6857 6

3 1 -9 2141.92 44.5153 3

1 -3 9 2131.05 50.0687 5

9 -1 3 2179.68 49.0339 3

1 3 -9 2085.33 50.6259 1

-3 1 9 2124.03 50.0527 4

9 -1 -3 2189.55 48.4110 4

-3 -1 9 2101.33 50.9676 4

3 9 -1 2140.30 49.2423 4

9 1 -3 2207.61 50.5805 4

9 -1 3 2361.91 49.8761 2

9 1 3 2178.62 47.0768 2

9 -3 -1 2102.27 45.3963 4

-1 9 3 2056.05 42.0915 4

1 -9 -3 1999.61 43.3183 2

3 -9 -1 2374.35 47.7164 2

1 3 9 2127.84 50.1736 5

-3 -1 -9 2117.74 51.0350 1

3 -1 -9 2142.54 51.2135 5

-3 1 -9 2192.95 49.1690 2

3 9 1 2229.98 49.4252 4

-3 9 1 2143.84 51.0417 30

1 9 3 2126.63 50.2271 28

-1 3 -9 2090.18 47.8105 27

1 9 3 2107.66 50.5287 30

3 9 1 2235.43 51.8651 28

1 9 -3 2148.96 51.7833 30

-3 9 -1 2090.37 50.4971 30

3 9 -1 2138.19 50.7138 30

-1 9 3 2076.91 50.6080 29

3 9 1 2068.31 49.7242 30

1 9 -3 2128.13 50.6176 28

-3 9 1 2100.06 50.9123 29

3 9 1 2204.23 47.0428 29

-1 9 -3 2191.71 51.6750 30

-1 9 3 2140.92 51.3640 30

-3 9 -1 2233.00 51.9354 24

-3 -1 9 2148.56 51.9598 25

-3 9 1 2138.89 50.8457 26

3 9 -1 2117.41 47.5173 27

-1 -3 9 2058.76 50.3726 25

-9 -1 3 2180.87 52.6770 25

-1 9 3 2130.88 50.5350 26

1 9 -3 2103.65 50.0536 27

-1 9 -3 2128.40 50.4969 24

3 9 1 2145.70 49.8706 26

3 9 -1 2103.65 48.0775 26

1 9 3 2159.42 50.9595 26

1 9 -3 2139.57 48.5001 26

-1 3 9 2113.10 50.7633 25

1 9 -3 2150.46 49.3063 24

1 3 -9 2057.89 51.4441 12

1 -3 -9 2176.21 51.7198 12

-1 -3 -9 2157.49 51.5079 12

-3 9 -1 2143.57 50.7032 13

9 3 -1 2129.77 52.8970 11

3 -1 -9 2114.23 52.9127 12

-1 3 -9 2121.29 51.7202 12

-1 9 3 2198.92 50.9957 13

9 -3 1 2095.49 52.4518 11

9 -1 -3 2212.62 54.2659 11

9 3 1 2128.61 52.4962 11

9 -3 -1 2163.79 53.2450 11

1 9 3 2108.66 49.9598 13

-9 1 -3 2135.73 47.0034 22

1 9 -3 2119.84 51.1149 23

-3 9 1 2084.22 49.1255 23

-3 9 -1 2146.61 50.4802 23

-1 3 -9 2175.54 45.8340 23

3 9 -1 2131.77 47.8847 22

-1 9 -3 2112.56 51.0205 23

3 9 1 2007.13 47.2517 23

-1 9 -3 2218.58 51.2167 22

-1 9 3 2124.94 46.3866 23

-9 3 -1 2121.69 46.0265 22

1 9 -3 2177.24 49.4876 22

-3 9 -1 2236.59 52.2530 22

-1 9 -3 2225.07 51.8226 20

-9 -1 3 2125.91 49.0977 21

-3 9 1 2074.11 48.9629 19

-3 9 -1 2223.77 51.8577 20

1 9 -3 2160.65 50.4056 20

-3 9 -1 2083.62 46.8486 19

-1 9 -3 2077.45 47.5314 19

-9 3 1 2157.74 51.9189 21

-9 1 3 2126.68 50.0950 21

-1 9 3 2188.14 52.1877 19

3 9 -1 2223.55 47.3092 20

-9 3 -1 2147.61 51.3465 14

3 9 -1 2062.57 50.9791 18

-9 3 1 2183.38 52.3263 17

1 9 -3 2148.10 48.2225 18

9 1 3 2398.51 49.4132 18

-9 1 3 2170.33 50.7815 14

9 -1 3 2070.61 52.2072 17

3 9 1 2075.89 51.7382 18

-9 -1 3 2139.47 49.6679 14

-9 3 1 2146.32 51.6380 14

9 3 1 2028.94 50.4160 18

-1 9 -3 2173.02 46.6609 15

-1 9 -3 2102.84 49.5440 16

-9 -3 1 2146.38 51.8052 17

1 9 -3 2155.73 51.4921 16

-3 9 -1 2136.44 46.8242 15

-3 3 -9 156.478 9.98778 7

-3 9 -3 188.273 10.7174 9

-9 -3 -3 152.691 9.95192 10

-3 -3 -9 148.149 10.8882 7

-3 3 -9 161.428 11.0375 8

-3 -3 -9 171.211 11.1566 8

-3 -3 -9 152.393 7.77115 2

9 3 3 154.683 7.11567 2

-3 3 9 147.808 8.95083 4

-9 -3 -3 147.465 10.4129 6

-9 3 -3 158.046 10.9396 6

-3 9 -3 162.351 10.2916 30

3 9 3 185.527 10.7200 28

3 9 -3 161.454 10.3682 28

3 9 3 153.933 9.51293 30

3 9 -3 150.716 10.3174 30

-3 3 9 153.792 10.4759 25

3 9 -3 164.184 9.70795 27

-3 -3 9 166.774 10.7293 25

-3 3 -9 165.268 8.65392 27

-9 -3 3 167.044 10.7004 25

-3 9 3 153.253 9.88065 26

3 9 -3 153.874 8.43911 26

-9 3 3 165.617 10.8106 25

-3 9 -3 148.678 10.0814 24

3 9 3 155.852 9.73251 13

3 -3 -9 151.678 10.7012 12

3 3 -9 142.253 10.3205 12

-3 9 -3 162.996 9.93213 13

-3 9 3 159.989 10.3861 13

-9 -3 3 141.278 8.85422 14

-9 3 -3 180.494 10.6924 14

3 9 -3 133.495 8.09573 22

-3 9 -3 169.354 10.6081 23

-9 3 -3 149.905 8.85503 22

-9 3 -3 151.213 9.37132 23

-3 9 3 155.271 8.73141 23

-3 9 -3 157.124 10.4937 22

-3 3 -9 154.655 7.45470 23

-9 3 3 170.565 10.5724 21

3 9 3 170.418 11.5756 19

-3 9 3 155.204 10.0805 19

-9 3 -3 187.792 11.2688 21

-3 9 -3 182.932 11.2833 20

9 3 -3 156.233 8.43952 16

-9 3 3 159.957 10.5262 14

3 9 -3 132.796 9.58739 18

-3 3 -9 150.323 9.73686 15

9 3 3 166.290 10.4449 18

-3 9 -3 144.012 8.69691 15

-1 -5 -9 2182.29 54.3832 7

-9 -5 1 2141.77 48.4547 10

-9 -1 -5 2252.82 55.1713 10

-5 1 -9 2106.04 53.0457 7

-9 -5 -1 2095.66 48.8328 10

1 -5 -9 2115.48 53.3080 7

-9 5 -1 2134.63 50.8590 9

-9 1 -5 2215.04 55.6657 10

-1 -5 -9 2174.93 51.5485 8

1 -5 -9 2123.39 49.9573 8

-9 5 -1 2134.20 54.4379 10

-5 -1 -9 2118.87 55.0362 8

9 -1 -5 2146.93 45.4648 3

-1 5 -9 2160.44 50.9526 1

1 5 -9 2194.37 51.2703 1

-9 -5 -1 2103.79 52.1369 6

-9 5 -1 2143.36 52.6158 6

5 1 -9 2087.48 43.0497 3

-9 -1 -5 2208.23 55.9374 6

1 -9 5 2230.66 47.4000 3

1 -5 -9 2184.67 51.0003 1

-5 -1 -9 2147.99 54.6106 6

9 1 5 2151.90 47.4577 2

5 -9 -1 2088.45 48.4464 2

-1 -5 -9 2213.20 50.9877 1

-9 5 1 2185.81 46.9568 30

1 9 -5 2179.40 51.1784 28

5 9 1 2221.10 50.6640 30

5 9 -1 2059.16 51.1044 30

1 9 5 2161.87 52.2598 30

-1 9 5 2184.04 53.3903 30

1 5 -9 2220.92 52.8356 27

1 9 5 2162.93 50.5325 28

5 9 1 2198.18 53.6150 28

-5 9 1 2149.94 52.4719 30

-1 9 -5 2119.85 53.2797 30

-5 9 -1 2244.89 51.9372 30

-1 -5 9 2181.29 51.4415 25

5 9 1 2290.37 51.7623 26

1 9 -5 2196.31 50.2288 24

-9 5 1 2154.92 47.9260 24

-5 -1 9 2150.30 54.5144 25

1 9 5 2266.87 53.9683 26

-9 -1 5 2180.44 54.8939 25

-1 9 5 2062.32 51.6587 26

-5 9 1 2179.13 52.7926 24

-1 9 -5 2182.79 51.7898 24

5 9 -1 2225.85 48.1680 27

1 9 -5 2213.58 53.4267 27

5 9 -1 2156.38 48.5799 26

-1 5 -9 2183.79 51.4794 27

-1 5 9 2133.01 51.4005 25

1 5 -9 2231.29 52.8057 12

5 -1 -9 2189.95 55.6576 12

1 -5 -9 2210.15 51.8819 12

9 5 1 2070.67 52.2566 11

9 5 -1 2169.30 53.0077 11

1 9 5 2179.75 50.9755 13

9 -5 1 2179.87 53.1974 11

-5 9 -1 2113.32 51.7967 13

-1 9 5 2124.55 51.7671 13

9 -5 -1 2156.34 52.8971 11

-1 -5 -9 2238.93 51.9404 12

-5 9 1 2144.29 52.9755 13

-1 5 -9 2197.60 52.2896 12

-1 9 -5 2097.85 52.0755 22

-1 5 -9 2181.54 49.6256 23

-5 9 1 2226.25 52.0316 23

1 9 -5 2117.69 53.6987 23

-5 9 1 2187.18 53.2251 22

1 9 -5 2195.63 50.6132 22

1 5 -9 2139.67 49.4989 22

-5 9 -1 2208.61 53.0279 23

-9 5 -1 2164.17 49.3419 22

-9 1 -5 2179.05 50.7208 22

-9 5 1 2131.95 47.7592 22

-1 5 -9 2204.79 52.1993 22

-9 -1 5 2213.04 48.8618 21

-1 9 5 2107.45 54.6634 19

-9 5 1 2135.59 53.9240 21

-9 1 5 2222.40 50.3114 21

5 9 1 2187.24 56.1345 19

-5 9 -1 2282.54 54.6815 20

-1 9 -5 2300.69 55.0394 20

-1 9 -5 2104.14 47.5149 19

1 9 5 2197.55 55.7965 19

-9 1 -5 2157.65 49.6442 15

9 5 -1 2193.80 55.8762 18

5 9 -1 2194.84 55.3265 18

-9 -1 5 2152.91 50.0835 14

1 9 -5 2182.88 48.3429 15

-5 1 -9 2191.36 50.2391 15

-9 5 -1 2193.41 52.7187 14

9 5 1 2112.66 54.3180 18

-9 5 1 2191.16 53.6965 14

5 9 1 2153.95 55.1983 18

-9 1 5 2174.70 51.7239 14

-1 9 -5 2212.49 49.9598 15

1 9 -5 2150.37 49.1158 18

-5 -1 -9 2161.41 48.0179 15

1 9 -5 2110.12 53.5559 16

-5 3 -9 241.416 12.7778 7

-9 -3 -5 243.954 13.7587 10

-9 5 -3 224.197 12.1872 9

-5 3 -9 256.070 14.3232 8

-9 -5 -3 255.824 12.1780 10

-3 -5 -9 234.399 13.5330 8

-9 5 -3 220.877 13.5856 10

-5 -3 -9 222.407 14.0559 8

-9 3 -5 237.227 14.2765 10

-3 5 -9 267.765 14.1149 8

-9 -5 -3 239.164 10.6809 3

-9 5 -3 234.510 13.1843 6

-9 -5 -3 241.662 13.1816 6

-9 -3 -5 246.854 14.2896 6

-9 3 -5 244.530 14.3677 6

-3 5 9 236.202 11.0379 4

-5 -3 -9 251.023 14.1697 6

-5 3 -9 259.493 14.4680 6

3 9 -5 237.868 10.3822 2

-5 3 9 234.620 11.5245 4

-3 9 5 263.987 14.5376 29

-5 9 -3 228.987 12.2718 30

5 9 -3 234.260 13.2447 30

5 9 3 250.698 11.8431 30

5 9 -3 267.560 14.1407 28

3 9 5 230.571 12.3312 28

3 9 -5 223.895 13.6656 30

-3 9 -5 256.761 13.4308 30

3 9 5 220.077 11.7129 30

-5 9 3 242.746 14.1154 29

3 9 -5 254.075 13.0722 28

-5 3 9 263.191 11.6264 29

-5 9 3 242.681 13.6180 30

5 9 3 242.062 13.4288 28

-3 9 5 236.358 13.7736 30

-5 9 -3 243.219 13.8230 24

-5 3 9 241.558 14.2364 25

-5 -3 9 242.088 14.0716 25

-9 5 3 236.694 13.0666 25

-9 -5 3 232.648 12.8435 25

-9 3 5 243.650 14.1205 25

-5 9 3 244.043 12.9592 26

-9 -3 5 217.227 13.3999 25

3 9 -5 250.813 13.5553 27

5 9 -3 228.889 10.1128 26

5 9 -3 233.996 11.9028 27

-3 5 9 225.675 12.8059 25

-3 9 5 242.728 12.7919 26

-3 -5 9 248.588 13.1845 25

-9 5 3 230.888 9.95942 24

3 5 -9 244.178 13.5021 12

9 3 -5 237.890 14.8486 12

5 -3 -9 259.575 14.7385 12

-5 9 -3 241.613 12.3483 13

3 9 5 228.347 11.7441 13

9 -3 -5 254.278 15.3866 12

5 3 -9 243.394 14.5186 12

-3 9 5 224.542 13.0838 13

3 -5 -9 237.773 12.9155 12

3 9 -5 227.671 10.7406 22

-9 5 -3 237.368 12.8808 23

-9 3 -5 252.002 12.9533 22

-9 3 -5 230.196 11.4325 23

-3 9 -5 213.451 13.3238 22

-3 5 -9 236.042 11.2366 23

-5 3 -9 239.066 9.67835 23

-5 9 3 243.011 13.6062 22

-3 5 -9 244.279 13.9742 22

-5 9 -3 243.389 13.6089 23

-9 5 -3 239.723 12.4232 22

-9 5 3 236.200 10.2636 22

-5 9 3 246.017 12.2322 23

5 9 3 216.981 14.1908 19

-9 5 3 250.596 14.1034 21

-3 9 -5 251.160 14.3375 20

3 9 5 252.780 15.2207 19

-5 9 -3 238.846 13.9206 20

-9 5 -3 251.660 13.8792 21

-9 3 5 250.322 13.0124 21

-5 3 -9 247.749 11.6887 20

-3 9 -5 211.536 10.0275 21

-5 9 -3 234.902 12.3690 21

-9 3 -5 251.940 13.5436 21

-9 3 -5 247.454 12.7839 15

5 9 -3 228.866 14.1686 16

9 3 -5 242.287 11.0375 16

-9 5 -3 213.524 12.2968 14

-3 5 -9 253.214 13.5863 15

9 5 -3 229.763 12.2801 16

9 5 3 244.121 14.2074 18

-5 9 -3 244.417 12.5776 15

3 9 -5 220.767 10.0629 15

-9 -3 5 230.502 11.0381 14

-5 3 -9 243.936 12.8825 15

-3 9 -5 217.694 11.9794 15

3 9 -5 252.440 13.3911 18

5 9 -3 250.109 14.7145 18

-9 5 -5 362.957 18.2941 10

-9 -5 -5 331.048 15.8242 10

-9 5 -5 373.265 15.7427 8

-5 5 -9 350.081 14.7986 7

-5 -5 -9 357.639 18.3610 8

-5 5 -9 348.266 17.1612 8

-9 -5 -5 394.721 17.9709 6

-9 5 -5 364.080 17.5040 6

-5 9 -5 392.856 16.5251 30

5 9 5 362.190 16.5495 28

-5 9 5 385.520 18.5747 29

-5 5 9 369.395 16.1307 29

-5 9 5 365.546 18.0386 30

5 9 -5 379.809 17.3201 28

5 9 5 369.818 14.7420 30

5 9 -5 345.165 16.7390 27

-5 5 9 387.029 17.8073 25

-5 9 5 358.791 16.0825 26

-5 -5 9 410.757 18.0756 25

-9 5 5 371.141 17.6983 25

-9 -5 5 370.335 17.3895 25

5 5 -9 363.967 17.9279 12

-5 9 5 349.319 17.6733 13

9 -5 -5 369.551 18.1830 12

9 5 -5 363.493 18.1418 12

5 -5 -9 370.851 17.6279 12

-5 5 -9 378.820 18.9169 22

-5 9 -5 379.549 17.9544 23

-5 5 -9 372.253 14.7233 23

-9 5 -5 346.093 16.0665 23

-5 9 -5 392.886 18.9842 22

-9 5 -5 369.280 17.2985 22

-5 9 5 401.299 15.4086 23

9 5 5 378.894 16.6660 19

-9 5 -5 354.551 16.8691 21

-5 9 -5 344.385 14.6020 21

-9 5 5 378.243 17.9411 21

-5 5 -9 345.784 16.3056 20

5 9 5 422.495 20.4457 19

9 5 -5 342.086 15.7976 16

9 5 5 398.463 19.3478 18

-5 9 -5 370.925 17.2449 15

-9 5 -5 367.599 17.4574 15

5 9 -5 393.814 19.6973 16

-5 5 -9 370.273 17.4942 15

-9 5 -5 380.618 16.3043 14

5 9 -5 349.965 18.3309 18

-1 -7 -9 93.2451 7.77237 8

-9 1 -7 128.212 11.1926 10

-7 1 -9 120.134 10.7385 8

-9 7 -1 116.707 10.1494 10

-7 9 -1 128.646 10.2103 9

-9 -1 -7 128.393 11.4648 10

-1 -7 -9 120.681 10.0518 7

-7 -1 -9 119.015 10.9471 8

-7 9 -1 109.797 8.39153 10

-9 7 -1 118.465 9.85344 9

-1 -9 -7 122.648 9.24748 7

1 -7 -9 116.109 9.48483 7

-9 -1 -7 111.335 10.7337 6

-9 -7 1 118.511 9.03897 6

-9 7 1 117.484 9.19411 6

-9 -7 -1 102.988 8.31115 6

-9 7 -1 108.589 8.54443 6

-7 -1 -9 110.956 10.3887 6

-9 7 1 109.509 8.22019 30

-1 9 7 117.558 9.99084 30

-7 9 1 109.351 9.24605 30

1 9 7 119.366 9.52802 30

7 9 -1 106.952 8.50959 30

7 9 1 102.031 7.91026 30

-7 9 -1 118.181 8.96022 30

-1 -7 9 108.350 8.31332 25

-1 7 -9 124.930 10.0944 27

1 7 -9 105.406 9.69887 27

1 9 -7 123.918 10.2906 27

-9 -1 7 113.080 10.5288 25

1 9 -7 97.8917 7.93936 24

-7 -1 9 108.302 10.3325 25

7 9 -1 106.374 7.35262 26

-9 7 1 99.6502 8.11178 24

1 7 9 118.584 8.67757 25

-1 9 7 149.942 10.1998 26

-1 7 9 105.616 8.21041 25

-7 9 1 103.406 9.10160 24

1 -7 9 102.658 8.03203 25

-7 9 -1 122.124 10.1123 24

1 7 -9 128.148 9.26974 12

7 -1 -9 104.021 10.7072 12

-1 9 7 111.540 9.17365 13

-9 7 -1 94.7399 8.32409 13

9 -1 -7 118.494 11.6458 12

-7 9 -1 109.030 9.13863 13

1 9 7 110.721 8.59900 13

1 -7 -9 97.3927 8.02978 12

-1 7 9 116.279 8.46123 13

-7 9 1 123.342 10.0510 13

-1 9 -7 107.895 9.24925 22

-1 7 -9 105.094 8.94491 23

1 9 -7 107.716 10.2185 23

-1 9 -7 107.210 9.51075 23

-7 9 1 109.149 9.26328 22

-1 7 -9 121.382 9.73081 22

-9 7 1 100.567 9.09374 23

1 9 -7 107.725 8.45281 22

-9 7 -1 114.301 8.97395 22

-9 7 -1 113.414 10.0551 23

-7 9 -1 101.722 9.43368 22

-7 9 -1 102.470 9.30795 23

1 7 -9 104.445 8.22052 22

-7 9 1 110.958 9.35651 23

-9 7 1 106.121 8.34697 22

-9 1 7 116.274 8.12348 21

1 9 7 126.683 11.3046 19

-9 7 1 134.817 11.2208 21

-7 9 -1 105.199 9.81822 21

-9 7 -1 119.600 10.4413 21

-9 -1 -7 99.8409 7.29626 15

-9 1 -7 115.432 8.49885 15

-7 -1 -9 96.8566 7.15256 15

-7 1 -9 118.814 8.59688 15

-1 9 -7 109.872 8.94448 15

9 7 -1 122.912 11.5079 18

9 7 1 113.043 10.7063 18

-1 7 -9 100.844 9.30149 15

1 9 -7 124.117 8.91696 15

-7 3 -9 993.708 34.2758 8

-7 9 -3 1072.43 34.8705 9

-9 7 -3 1088.42 34.1606 9

-9 3 -7 1082.34 34.4610 8

-3 -7 -9 1038.52 31.6114 8

-9 7 -3 1079.70 33.8480 10

-9 3 -7 1100.36 36.4012 10

-7 3 -9 1017.78 34.8188 10

-7 3 -9 1077.09 32.0753 7

-9 -3 -7 1022.38 34.4481 10

-7 -3 -9 1057.47 36.8160 8

-7 9 -3 1066.94 29.6300 10

-9 -7 -3 1033.37 30.5182 6

-9 7 -3 1038.90 30.9243 6

-9 -3 -7 1041.60 35.4170 6

-9 3 -7 1056.19 35.5791 6

-7 -3 -9 1073.78 35.7931 6

-7 3 -9 1015.12 34.5391 6

3 9 -7 1054.25 30.3992 28

-7 9 3 1003.27 34.4429 29

3 9 7 1078.40 31.1467 30

3 7 9 1067.93 29.6312 30

-7 9 3 1101.76 33.9002 30

7 9 3 1092.67 34.1924 28

-9 7 3 1064.87 31.3411 30

7 9 -3 1050.88 30.2981 27

-3 9 7 1100.02 35.3691 29

3 9 7 1056.44 29.7813 28

7 9 -3 1063.44 34.2901 28

-7 9 -3 1007.90 29.7668 30

-3 9 7 1069.66 31.5828 26

-7 -3 9 1051.65 35.0156 25

-3 7 9 1036.41 28.8034 26

-9 -3 7 1089.57 35.3836 25

-7 3 9 1025.30 34.9212 25

-3 7 9 1037.91 30.8785 25

-9 3 7 1011.17 34.7735 25

3 9 -7 1077.58 34.6361 27

-3 -7 9 1084.79 30.9590 25

3 7 -9 1077.95 31.7863 12

9 7 -3 1071.00 32.3269 12

9 3 -7 1042.23 36.3527 12

7 3 -9 1105.13 36.7796 12

3 9 7 1066.41 29.2227 13

-9 7 -3 1047.30 28.4888 13

-7 9 -3 1015.51 30.3528 13

3 -7 -9 1096.21 31.1776 12

9 -3 -7 1044.86 35.9335 12

9 -7 -3 1023.89 31.3483 12

-7 9 3 1100.86 34.8845 13

-3 9 7 1077.13 33.5026 13

7 -3 -9 1045.00 35.5752 12

-7 9 -3 1023.75 34.3290 22

-7 9 3 1060.73 32.7365 22

-7 9 3 1045.66 32.2007 23

-9 7 3 1117.71 30.4770 22

-3 7 -9 1044.39 31.6406 23

-3 9 -7 1036.81 34.3904 22

-9 3 -7 1086.81 34.3322 22

-9 3 -7 1085.40 29.1507 23

-9 7 -3 1111.89 33.6936 22

-3 7 -9 1013.34 34.1086 22

-9 7 -3 1142.92 34.4630 23

-3 9 -7 1024.48 33.4246 23

9 7 3 1064.35 34.4510 19

-7 9 -3 1035.68 32.8780 21

-7 3 -9 1057.90 28.7291 20

-9 7 3 1092.78 35.7254 21

7 9 3 996.436 35.4797 19

3 9 7 1054.57 36.6892 19

-9 7 -3 1091.34 34.3542 21

-9 3 7 1076.61 30.9988 21

9 7 -3 1083.97 33.9828 16

9 7 -3 1045.86 37.3298 18

3 9 -7 1039.03 29.7735 15

7 9 -3 1022.54 34.9340 16

9 7 3 1086.78 36.6471 18

-9 3 -7 1020.85 31.8726 15

-7 3 -9 1049.52 32.3060 15

-3 9 -7 1078.23 33.2206 15

-9 7 -3 1032.60 31.3449 14

7 9 3 1035.35 36.5172 18

-7 9 -3 1103.03 33.7717 15

7 9 -3 1018.95 36.4466 18

-7 5 -9 1038.42 29.0326 7

-7 5 -9 1021.17 33.5194 8

-7 9 -5 1011.40 29.0606 10

-7 5 -9 999.199 33.5580 10

-9 5 -7 979.185 31.5692 8

-5 -9 -7 1020.13 31.5034 8

-5 7 -9 994.531 31.3181 8

-5 -7 -9 1065.15 34.2886 8

-9 7 -5 1031.21 33.6867 10

-9 5 -7 1078.17 35.7711 10

-7 -5 -9 998.464 36.3772 8

-9 -7 -5 997.231 31.0090 6

-9 7 -5 1063.61 31.9778 6

-9 -5 -7 1021.15 34.2001 6

-9 5 -7 966.072 33.6874 6

-7 -5 -9 1074.84 34.6916 6

-7 5 -9 1001.77 33.8637 6

7 9 -5 996.472 32.3428 27

7 9 -5 1055.83 33.5522 28

5 9 -7 1038.94 34.4043 27

7 9 5 1028.36 32.6234 28

-7 9 5 1022.35 35.2657 29

5 9 7 1003.60 30.2143 28

-7 9 -5 1046.34 29.3104 30

-7 9 5 966.864 33.5943 30

-5 7 9 1041.33 33.4961 29

5 9 -7 1047.25 31.3439 28

-5 9 7 1035.35 35.2524 29

-7 5 9 1035.10 30.8582 29

-9 -7 5 979.751 30.9736 25

-5 9 7 1033.69 30.7198 26

-7 5 9 999.082 34.0168 25

-9 -5 7 994.573 33.6655 25

-5 -7 9 1028.83 31.3744 25

-7 -5 9 1015.76 34.0793 25

-9 5 7 972.815 33.8443 25

-5 7 9 1017.99 31.8375 25

-9 7 5 953.167 31.4277 25

9 7 -5 989.158 32.3422 12

9 -7 -5 989.717 31.8705 12

5 7 -9 1007.26 32.2490 12

7 5 -9 1059.42 35.4615 12

7 -5 -9 1014.65 34.4815 12

5 -7 -9 1113.75 32.5986 12

9 5 -7 1012.46 35.2471 12

9 -5 -7 1014.91 34.8445 12

-7 9 -5 972.145 28.5822 13

-9 5 -7 1050.27 30.9697 23

-5 7 -9 1028.34 31.5701 23

-5 9 -7 1036.72 34.1048 23

-9 5 -7 1007.72 34.6839 22

-5 7 -9 1001.21 35.5616 22

-7 9 -5 1035.90 34.1789 23

-7 5 -9 976.951 28.7115 23

-9 7 -5 1117.77 35.4381 22

-5 9 -7 1033.48 36.0052 22

-9 7 -5 1036.36 33.4311 23

-9 5 -7 1065.40 30.9536 20

-9 5 7 1023.94 32.6552 21

9 7 5 1057.16 34.3444 19

-9 7 5 1048.43 35.3196 21

5 9 7 1126.15 37.8167 19

-7 9 -5 1116.65 36.2641 20

-7 9 -5 1034.63 31.1490 21

-7 5 9 1056.61 30.8873 21

-5 7 -9 1048.56 34.5393 20

-9 7 -5 999.167 32.4740 21

-5 9 -7 1111.71 36.6878 20

-7 5 -9 1100.29 32.0530 20

5 7 9 1081.75 35.2887 19

7 9 5 1038.25 36.4319 19

-9 5 -7 1071.70 31.8299 21

-9 7 -5 1018.12 29.9704 14

-7 9 -5 1030.33 34.1250 15

9 7 -5 994.671 33.4524 16

-9 5 -7 1019.22 33.6396 15

7 9 -5 1037.73 36.1772 16

7 9 -5 1060.91 37.3193 18

-7 5 -9 1083.91 34.5719 15

-5 9 -7 1086.12 34.6314 15

-9 7 -5 1005.43 34.2762 15

-5 7 -9 991.188 34.0352 15

-9 5 -7 1011.78 29.9443 14

-7 -7 -9 50.7041 8.72219 8

-7 7 -9 58.2489 7.30602 8

-9 7 -7 59.7324 8.13336 10

-7 9 -7 54.7828 6.92308 10

-9 -7 -7 60.0501 7.64055 6

-9 7 -7 69.8060 8.19754 6

7 9 -7 61.7884 7.66978 28

-7 9 7 52.6548 8.38178 29

-7 7 9 44.5381 7.57942 29

7 9 7 76.2960 7.83441 28

-7 -7 9 57.9929 7.81219 25

-9 -7 7 47.3871 7.35564 25

7 9 -7 55.8937 8.15842 27

-9 7 7 72.5842 8.71243 25

-7 7 9 62.4677 8.05247 25

7 7 -9 55.6462 7.86835 12

9 7 -7 58.1978 8.27796 12

9 -7 -7 41.9749 7.26941 12

7 -7 -9 50.3284 7.62644 12

-9 7 -7 52.9176 7.45865 23

-7 9 -7 57.4057 8.05486 23

-7 7 -9 62.7535 7.58369 23

-7 7 -9 55.9020 9.00644 22

-9 7 -7 83.4448 9.99736 22

-7 9 -7 53.3491 6.29996 21

7 9 7 81.6060 9.99990 19

-9 7 7 57.6878 8.37964 21

9 7 7 73.6994 8.86328 19

-9 7 -7 57.5018 7.12895 21

-9 7 -7 65.0722 8.19704 20

-7 9 -7 65.0617 8.90748 20

-7 7 -9 66.5789 8.53101 20

7 7 9 59.9916 8.25061 19

-7 7 -9 54.6608 8.58527 15

-9 7 -7 54.8192 8.33700 15

-9 9 -1 245.480 16.0869 9

-9 1 -9 259.196 17.2830 8

-9 9 1 253.289 15.4739 10

-9 9 -1 246.693 14.5429 10

1 -9 -9 232.381 13.4051 7

-1 -9 -9 255.554 14.8873 7

-9 -1 -9 293.440 18.4235 10

-9 9 1 258.637 16.3265 9

-9 -1 -9 259.286 17.7807 6

-9 9 -1 239.186 12.5135 30

-1 9 9 252.305 15.5450 30

1 9 9 290.413 15.5016 30

-9 9 1 260.102 14.0796 30

-9 9 1 245.449 14.4547 24

1 9 -9 268.588 12.9725 24

-9 -1 9 275.942 17.9395 25

-9 9 -1 294.612 16.2778 24

-1 9 9 265.532 14.6187 26

-9 9 1 249.510 15.1636 13

-9 9 -1 252.706 14.4803 13

-1 9 9 274.501 14.4233 13

1 9 9 274.623 13.2276 13

9 -1 -9 271.341 18.2888 12

-9 9 1 304.679 15.7468 22

-1 9 -9 243.762 15.3636 23

-9 9 -1 244.627 14.8056 22

1 9 -9 246.274 16.0038 23

-9 9 -1 265.480 16.2880 23

1 9 -9 281.172 14.2844 22

-9 9 1 277.330 16.2476 23

-1 9 -9 273.105 15.5491 22

-9 9 -1 278.729 17.2273 21

9 9 1 242.905 17.7012 18

-9 1 -9 242.018 13.2576 15

1 9 -9 262.496 15.0033 15

9 9 -1 303.298 19.3992 18

-1 9 -9 260.682 15.4936 15

-9 3 -9 1123.00 38.1621 8

-9 3 -9 1121.55 34.1052 7

-9 3 -9 1053.33 38.5665 10

-3 -9 -9 1138.82 37.0969 7

-9 -3 -9 1094.87 40.8742 8

-9 9 -3 1136.22 34.4587 10

-9 9 -3 1152.56 38.0699 9

-9 -3 -9 1128.26 39.3298 6

-9 3 -9 1064.73 38.3912 6

-9 9 3 1153.09 35.3614 30

3 9 9 1147.42 33.2655 30

9 9 -3 1050.43 31.4534 27

-3 9 9 1157.99 38.3802 29

-9 3 9 1107.00 39.0810 25

-9 -3 9 1073.71 38.2735 25

-9 9 -3 1075.60 37.0777 24

-3 9 9 1104.00 32.9798 26

3 9 -9 1103.44 37.9778 27

-3 9 9 1130.89 35.5103 13

-9 9 -3 1097.81 32.2253 13

9 -3 -9 1115.95 39.4517 12

9 3 -9 1113.26 40.1006 12

-3 9 -9 1092.91 35.7681 23

-9 3 -9 1152.31 38.7630 22

-9 9 -3 1154.80 37.6563 22

-3 9 -9 1121.67 37.8951 22

-9 9 3 1137.48 39.3769 21

-3 9 -9 1160.31 39.5443 20

9 9 3 1088.08 38.9674 19

-9 9 -3 1137.32 37.1762 21

-9 3 -9 1106.60 34.8877 15

3 9 -9 1114.71 34.0861 15

9 9 -3 1157.80 38.4632 16

-3 9 -9 1093.26 36.5284 15

9 9 3 1178.69 41.3540 18

-9 5 -9 1267.61 41.7177 10

-9 9 -5 1266.06 37.1221 10

-5 -9 -9 1251.50 37.7948 8

-9 -5 -9 1268.41 44.8545 8

-9 5 -9 1206.53 39.0812 8

-9 -5 -9 1246.39 41.0423 6

-9 5 -9 1161.36 40.2012 6

-5 9 9 1281.62 41.6107 29

9 9 5 1242.81 39.0215 28

9 9 -5 1267.74 39.9379 28

-9 5 9 1250.05 35.3489 29

5 9 -9 1277.42 33.7339 28

-9 9 5 1283.08 40.0995 30

5 9 -9 1172.94 40.5921 27

-9 -5 9 1243.63 40.8001 25

-5 9 9 1201.74 34.3455 26

-9 5 9 1190.54 40.4118 25

9 -5 -9 1265.94 42.1930 12

9 5 -9 1254.79 42.4112 12

-9 9 -5 1173.30 40.7557 22

-5 9 -9 1284.16 39.5835 23

-5 9 -9 1215.19 42.3751 22

-9 5 -9 1260.87 42.5807 22

-9 9 -5 1189.12 39.7108 23

-9 5 -9 1210.61 34.0342 23

-9 5 9 1265.91 36.8563 21

-5 9 -9 1300.38 42.5851 20

-9 5 -9 1310.01 35.7111 20

9 9 5 1244.47 41.8939 19

-9 9 5 1183.69 41.6074 21

-9 9 -5 1253.97 38.2861 21

5 9 9 1261.71 43.0983 19

-9 5 -9 1333.97 41.0663 15

-5 9 -9 1296.18 41.3197 15

9 9 -5 1238.76 41.6735 16

-9 -7 -9 92.7527 11.7661 8

-9 7 -9 105.294 9.80423 8

-9 9 -7 113.398 10.2554 10

-9 7 -9 95.9254 10.3494 10

-7 -9 -9 111.446 11.5912 8

-9 9 -7 82.6222 8.31347 6

-9 -7 -9 104.809 10.5642 6

-9 7 -9 107.482 10.9237 6

9 9 7 101.291 9.68877 28

-7 9 9 103.904 11.3297 29

7 9 -9 101.768 8.70070 28

7 9 -9 105.065 11.5323 27

-9 9 7 132.157 12.5743 30

9 9 -7 100.037 9.99246 28

-9 7 9 111.035 10.2535 29

9 7 -9 92.6907 8.43851 28

-9 9 7 82.2102 8.58630 25

-9 -7 9 114.325 10.9674 25

-7 9 9 86.3231 8.44513 25

-9 7 9 102.572 10.5885 25

9 -7 -9 117.248 11.2224 12

9 7 -9 98.6671 10.9054 12

7 9 -9 77.5255 8.56837 12

9 9 -7 82.6472 8.87468 12

-7 9 -9 85.8472 11.3752 22

-9 9 -7 98.6032 11.5513 22

-9 9 -7 100.307 10.3290 23

-9 7 -9 115.078 10.2359 23

-9 7 -9 102.173 11.8117 22

-7 9 -9 91.9881 9.89722 23

-9 9 7 113.284 12.0198 21

-9 7 -9 108.896 10.3245 20

-9 7 9 88.0787 9.96120 21

9 7 9 102.757 10.5163 19

9 9 7 115.722 11.6316 19

-7 9 -9 112.780 11.7756 20

7 9 9 112.021 11.9144 19

-9 9 -7 98.5860 9.35984 21

-9 7 -9 107.237 11.4399 15

-9 -9 -9 182.197 15.5775 8

9 9 -9 267.311 17.6925 27

9 9 -9 179.068 12.1581 28

-9 9 9 189.345 13.0695 25

9 9 -9 194.938 13.2845 12

-9 9 -9 222.303 14.9577 23

-9 9 -9 247.610 16.7808 20

-9 9 9 200.678 15.4029 21

9 9 9 242.377 16.6789 19

-9 9 -9 241.215 17.6255 15

0 10 0-0.43754 1.95500 9

-10 0 0-0.76552 3.34849 10

0 0 -10 0.78997 2.88201 8

0 0 -10-0.46551 1.64438 3

10 0 0 0.41245 1.59599 3

0 10 0 0.52527 2.29761 29

0 10 0 0.68689 3.06914 30

0 10 0-4.91463 2.79123 28

0 10 0 2.56735 2.80747 26

0 10 0-5.64613 2.94983 13

0 0 -10 3.91773 3.71341 12

0 10 0 1.14003 2.49331 23

0 10 0 3.19218 2.95164 20

0 10 0 0.68319 2.78667 19

0 10 0 1.33627 3.16645 22

-10 0 0-1.44790 3.30144 21

10 0 0 2.99419 2.45106 18

0 10 -2 479.210 16.6438 9

-10 2 0 503.777 15.6299 9

-2 10 0 446.667 17.4933 9

-10 -2 0 494.207 19.7441 10

-10 2 0 537.573 21.8672 10

-2 0 -10 478.876 20.5530 7

2 10 0 486.529 14.6277 9

-10 0 -2 472.323 20.2743 10

0 -2 -10 526.644 20.9448 8

-2 0 -10 495.914 21.1068 8

0 -2 -10 505.008 21.1549 7

-2 0 -10 493.894 17.6626 2

0 2 -10 487.848 15.7957 3

2 -10 0 504.930 15.6267 2

-10 0 -2 464.888 20.7926 6

10 0 -2 489.625 15.0683 3

10 -2 0 489.117 16.9119 3

-2 0 -10 515.803 17.8845 3

2 0 -10 505.270 15.9935 3

0 -2 -10 529.861 18.0877 3

2 10 0 516.261 16.9487 4

0 10 2 478.638 13.8312 4

10 0 -2 480.249 17.7881 4

0 10 2 490.300 19.5921 28

0 10 2 480.584 18.4724 29

2 10 0 486.012 19.3743 30

-2 10 0 465.798 18.4905 29

0 10 -2 470.073 19.5569 30

2 10 0 503.830 20.1571 28

0 10 2 500.182 19.8567 30

2 10 0 500.048 16.4978 29

0 10 -2 528.614 20.2933 28

2 10 0 487.391 18.5828 26

-10 0 2 462.166 20.1411 25

0 10 -2 517.192 19.0548 26

0 10 -2 523.519 19.5502 24

-2 0 10 494.176 20.3120 25

0 2 -10 489.182 20.5481 12

2 0 -10 500.411 20.9977 12

-2 0 -10 531.847 21.3021 12

0 10 2 477.397 19.5151 13

0 -2 -10 506.306 20.7257 12

-2 10 0 510.561 20.3320 22

0 10 -2 494.541 19.3965 23

-2 10 0 507.648 20.1319 24

2 10 0 523.470 18.5662 23

-2 10 0 519.147 19.0092 23

0 10 2 486.484 16.8159 23

0 10 -2 531.976 19.8425 22

0 10 -2 456.403 18.2518 19

0 10 2 515.820 20.7615 19

-10 0 2 495.697 19.3432 21

0 10 -2 510.567 19.2164 20

2 10 0 484.139 16.4403 20

-10 2 0 493.690 20.2911 21

-2 10 0 474.538 18.2022 19

-10 0 -2 526.522 20.9937 21

-2 10 0 498.853 19.0979 20

2 10 0 514.505 21.0643 19

0 10 -2 532.945 19.5136 16

-2 10 0 515.559 16.9521 16

0 10 -2 493.622 16.6992 18

2 10 0 473.981 18.9601 18

10 2 0 474.134 18.6729 18

-10 2 0 527.461 20.6318 14

-10 0 2 496.678 19.4548 14

-2 10 -2 946.612 28.5503 9

-10 2 -2 1032.73 33.0940 10

-10 -2 -2 1021.42 31.5181 10

-2 -2 -10 1047.86 33.3096 7

-2 2 -10 1052.02 32.1015 7

-10 -2 2 1021.20 30.9722 10

-2 -2 -10 1002.44 32.3353 8

-2 2 -10 1041.86 27.8349 3

-2 -2 -10 1054.40 27.6408 2

2 2 -10 977.503 24.2201 3

-10 -2 -2 974.403 32.2593 6

-10 2 -2 1006.01 32.8756 6

10 2 2 1049.47 26.3312 2

10 -2 -2 1003.68 26.6324 3

2 10 2 1084.36 27.4638 4

2 10 2 1029.62 28.7115 29

2 10 -2 982.292 31.0243 30

2 10 2 1012.22 31.1829 28

-2 10 2 951.526 30.9140 30

2 10 -2 976.451 31.0939 28

-2 10 2 1045.83 31.3688 29

2 10 2 980.297 30.2611 30

-2 10 -2 1023.74 31.1967 30

-2 -2 10 1008.47 31.5720 25

-2 2 10 961.316 31.2207 25

-10 2 2 933.401 31.1854 25

-2 10 -2 1043.07 31.6009 24

2 10 2 1018.27 30.4707 26

-10 -2 2 983.356 31.6909 25

-2 2 -10 1024.89 26.5116 27

-2 10 2 992.035 30.8674 26

2 10 -2 1047.58 29.1770 26

2 -2 -10 990.410 32.0009 12

2 2 -10 939.713 31.7162 12

-2 10 -2 994.348 30.7727 13

-10 2 -2 1000.37 31.5521 14

-2 2 -10 992.593 31.9577 12

2 10 2 987.493 30.5713 13

-10 -2 2 1013.96 30.1642 14

-2 10 2 1013.31 31.4359 13

-2 -2 -10 1005.01 31.9435 12

-2 10 -2 1031.36 31.6250 22

2 10 2 1025.38 27.0207 23

-2 10 -2 1045.67 31.2079 23

2 10 -2 983.283 30.3453 23

-2 10 2 1026.08 28.3418 23

-2 10 2 1060.67 32.1579 22

2 10 -2 1038.73 29.2203 22

-10 2 -2 1004.88 26.0606 22

2 10 -2 1037.65 29.0505 20

2 10 2 994.633 32.8654 19

-2 10 -2 983.266 27.4552 19

-2 10 2 1031.48 30.9039 19

-2 10 -2 1060.09 31.6950 20

-10 2 2 1092.56 32.0005 21

2 10 -2 1005.65 31.5838 19

2 10 -2 1033.44 29.9166 18

-2 10 -2 1011.81 28.1331 16

2 10 -2 1063.18 32.0699 16

-2 10 -2 1019.20 26.4506 15

10 2 2 1065.91 30.0113 18

-10 2 2 1053.19 31.7486 14

-4 10 0 2.16951 2.94973 9

-10 4 0 1.09017 2.22333 9

-4 0 -10 1.80607 3.68337 8

-10 -4 0 1.25916 2.87111 10

-10 0 -4-0.87486 3.47811 10

0 -4 -10-1.43558 3.20723 8

4 10 0-0.59403 2.59835 4

-4 0 -10-0.84611 4.00990 7

0 -4 -10 0.86174 3.33457 7

4 -10 0-1.46004 1.60045 2

4 0 -10-0.33394 1.46071 3

-10 4 0 5.85397 4.10750 6

-10 0 -4 1.84343 3.66438 6

10 0 -4-1.15263 2.03579 4

0 10 4 3.84852 3.43919 30

0 10 4 0.68037 2.84367 28

0 10 4-0.74806 3.05125 29

4 10 0 0.80281 2.64005 28

-4 10 0-0.73813 3.08511 30

4 10 0-2.79696 3.43440 30

0 10 -4 4.22608 2.87295 28

-4 0 10 0.85089 3.10427 25

0 4 -10 0.63536 2.45859 27

0 10 4-0.74529 3.18834 26

4 10 0 0.60008 2.50809 26

-10 0 4 0.87772 3.75488 25

-10 0 4-1.35390 3.02474 14

0 4 -10 1.56504 3.77660 12

0 10 4 1.41385 3.15867 13

4 0 -10-0.90936 3.89024 12

-4 10 0 1.52166 3.10335 13

0 -4 -10 1.50606 3.29384 12

0 10 -4 0.66034 2.82490 24

0 4 -10-3.15195 2.93172 22

-10 0 -4-0.98371 2.28745 22

-4 10 0-0.69890 2.98986 23

0 10 -4 0.78956 2.78905 23

0 4 -10-1.44656 2.48780 23

-10 4 0-0.79776 1.95914 22

0 10 4 1.76679 3.41836 19

0 10 -4-0.59203 2.64531 19

0 10 -4-0.77001 3.21834 20

0 10 -4-1.36117 3.22546 22

-10 4 0 1.65668 3.20532 21

-4 10 0-0.51092 2.18570 19

-10 0 4 0.62177 3.00078 21

10 4 0 0.81267 3.39665 18

-4 0 -10-0.55174 2.46529 15

4 10 0-0.83510 3.73138 18

0 10 -4 0.43831 2.22582 15

0 10 -4 1.47409 3.29325 16

-4 2 -10 232.976 14.9218 8

-10 4 -2 260.699 15.4725 10

-10 4 -2 259.734 12.5293 9

-4 10 -2 271.067 14.3485 9

-10 -4 2 300.647 13.9784 10

-10 -4 -2 257.627 13.3909 10

-10 -2 -4 253.951 14.7753 10

-4 2 -10 280.820 15.0568 7

-4 -2 -10 267.423 15.6157 8

-2 -4 -10 238.279 14.1700 8

-10 2 -4 243.686 15.0218 10

-2 4 -10 277.391 15.5521 8

-2 -4 -10 234.131 14.7049 7

10 -2 -4 267.763 10.9807 3

10 2 4 254.413 10.6320 2

-10 2 -4 258.062 15.4043 6

-10 -4 -2 275.416 14.9897 6

-10 -2 -4 243.208 15.1411 6

-4 -2 -10 271.948 11.5428 2

-10 4 -2 271.433 15.3157 6

4 10 2 265.884 13.6083 30

4 10 2 261.569 12.0501 29

-4 10 -2 276.338 14.4665 30

-2 10 4 273.312 15.0411 29

-2 10 -4 244.781 14.3067 30

2 10 -4 269.655 14.3127 28

4 10 -2 281.302 14.8062 30

4 10 -2 261.203 14.7986 28

-4 10 2 292.034 15.3833 30

-4 10 2 244.519 14.3981 29

2 10 4 266.500 14.0653 28

2 10 4 268.649 13.9689 30

2 10 -4 242.155 14.5261 30

-2 10 4 282.059 15.2594 30

4 10 2 234.501 14.0874 28

-4 -2 10 269.760 15.3210 25

-2 -4 10 257.920 14.1845 25

-10 2 4 261.514 15.3473 25

-10 -2 4 291.980 15.8634 25

2 10 -4 273.901 14.3526 27

4 10 2 281.220 14.2687 26

-2 10 4 262.746 14.3410 26

-2 4 -10 257.287 12.4707 27

-4 2 10 227.160 14.2152 25

-2 10 -4 271.420 14.4944 24

-4 10 2 269.771 14.4781 26

4 10 -2 274.077 12.4028 26

4 10 -2 281.317 13.0295 27

-4 10 -2 270.139 14.9644 24

-2 4 10 279.303 14.9226 25

2 -4 -10 265.593 14.4975 12

2 4 -10 270.309 15.0464 12

2 10 4 254.318 13.4873 13

-4 10 -2 270.473 14.2646 13

4 -2 -10 275.253 15.7646 12

4 2 -10 257.522 15.5595 12

-2 10 4 269.812 14.7229 13

2 10 -4 250.610 14.6910 23

2 4 -10 269.891 12.0994 22

-2 10 4 257.941 11.4109 23

-2 10 -4 283.587 15.0592 22

-4 10 2 264.615 14.8135 22

-2 4 -10 261.335 11.2621 23

2 10 -4 286.232 13.2402 22

-2 10 -4 271.414 14.9323 23

-4 10 -2 263.851 14.6066 23

-4 10 -2 275.298 15.3664 22

-10 2 -4 285.930 13.0481 22

4 10 2 272.944 11.7827 23

-4 10 2 265.212 13.2536 23

-2 4 -10 263.028 14.5659 22

-10 4 -2 278.849 12.4057 22

4 10 2 267.414 15.9955 19

-2 10 -4 270.133 15.2730 20

-4 10 -2 287.217 15.5424 20

-10 2 4 271.120 14.0570 21

4 10 -2 276.496 12.2899 20

-2 10 4 274.114 15.3273 19

-10 2 -4 293.408 15.6380 21

-10 4 -2 254.354 14.6831 21

-10 4 2 268.549 15.0840 21

-4 -2 -10 277.803 11.6248 15

-10 -2 4 259.719 13.0911 14

-2 4 -10 269.899 14.3796 15

2 10 -4 233.995 12.6177 18

-10 4 -2 274.366 14.7286 14

10 2 4 297.223 14.2482 18

4 10 -2 254.622 14.5738 18

-4 10 -2 251.834 12.3824 15

-2 10 -4 261.343 12.3576 15

-10 4 2 260.700 14.9216 14

-10 2 4 274.968 14.6140 14

10 4 2 265.136 14.5068 18

2 10 -4 268.982 10.5714 15

4 10 2 274.917 15.7082 18

2 10 -4 261.314 15.1507 16

-4 2 -10 269.102 13.5583 15

-4 10 -4 1.63169 3.49039 9

-4 -4 -10 0.91844 3.65156 8

-10 4 -4 2.90378 3.94825 10

-10 -4 -4-0.76341 3.26607 10

-4 4 -10-0.90630 3.50719 8

-4 -4 -10 5.98811 4.36562 7

-4 4 -10 2.11389 3.46109 7

-10 -4 -4 5.32967 3.88563 6

-10 4 -4 0.90899 3.51761 6

-4 10 -4 0.77531 3.24072 30

4 10 -4 1.64492 3.35495 28

4 10 4 6.28420 4.05304 28

4 10 -4 3.47609 3.63239 30

4 10 4 3.27897 3.16524 30

4 10 -4 1.45417 3.24899 27

-10 -4 4 6.78021 4.23408 25

4 10 -4 0.92249 2.06131 26

-10 4 4 6.99277 4.14274 25

-4 -4 10-0.84182 3.83919 25

-4 4 10 0.85749 3.40928 25

-4 10 4 7.73363 3.86360 26

-4 10 -4 6.92658 3.57393 13

-4 10 4-0.86490 3.25274 13

4 -4 -10 4.37638 4.14832 12

4 4 -10 4.54055 3.97237 12

-10 4 -4 0.76996 3.06129 14

-10 -4 4 0.58655 2.62111 14

-10 4 -4 2.03657 2.69914 22

-4 10 -4 0.86072 3.59768 23

-4 10 -4 1.73873 3.45647 24

-10 4 -4 2.09154 2.98277 23

-4 4 -10 2.12429 2.29280 23

-4 10 4-0.55927 2.74721 23

-4 4 -10 0.91125 3.11002 22

-4 10 -4 4.64055 3.69001 20

10 4 4 1.84857 3.07847 19

4 10 4 7.29408 4.55804 19

-10 4 -4 2.54665 4.16958 21

-4 10 -4 3.50227 2.76662 21

-10 4 4-0.83012 3.46979 21

-4 10 -4 8.12429 4.50969 22

-4 4 -10 0.78621 3.04256 15

10 4 -4 3.31671 2.85232 16

4 10 -4 2.51787 3.75031 18

10 4 4 4.20737 3.68091 18

-4 10 -4 2.70219 3.08097 15

-6 0 -10 132.151 11.1177 7

-10 0 -6 152.006 12.3772 10

-10 6 0 138.856 10.2860 9

0 -6 -10 139.389 9.81303 8

-10 6 0 133.218 11.3888 10

0 -6 -10 142.490 11.4072 7

-10 -6 0 100.910 9.19630 6

-10 6 0 138.024 10.8594 6

-10 0 -6 128.703 11.9064 6

-6 0 -10 138.156 11.6863 6

6 10 0 132.995 10.8324 28

0 10 6 134.170 10.7081 30

0 10 6 132.217 11.0708 29

0 10 -6 148.327 12.0152 30

6 10 0 139.229 9.98676 30

-6 10 0 135.965 10.6956 30

0 10 -6 145.180 10.0742 24

-6 0 10 141.229 12.0175 25

0 6 -10 141.586 10.9653 27

0 -6 10 119.164 9.61907 25

0 10 6 151.298 11.0499 26

6 10 0 139.601 9.40756 26

-10 6 0 153.002 9.77320 24

-10 0 6 127.536 11.2460 25

-6 10 0 141.228 11.1684 24

0 6 10 130.769 10.0622 25

6 0 -10 125.772 11.6518 12

0 10 6 129.431 9.84173 13

0 -6 -10 149.685 10.5052 12

10 0 -6 123.450 12.0859 12

-6 10 0 149.494 11.2834 13

0 6 -10 117.739 9.97584 12

-6 10 0 143.093 11.3091 22

0 6 -10 129.530 9.62300 23

-10 0 -6 135.039 9.83597 22

-6 10 0 148.420 11.0207 23

0 6 -10 132.396 9.75694 22

0 10 -6 129.672 10.1370 22

-10 6 0 134.655 9.09823 22

0 10 -6 121.807 11.0537 20

-10 0 6 128.581 8.92317 21

6 10 0 141.960 11.8843 18

10 6 0 125.031 11.4153 18

-6 0 -10 142.961 9.27476 15

-10 6 0 122.978 10.4314 14

0 10 -6 112.014 8.74910 15

-6 2 -10 863.998 31.8975 8

-10 6 -2 865.675 28.5178 9

-6 2 -10 898.538 30.0615 7

-10 -6 -2 866.351 25.8251 10

-10 -2 -6 913.174 32.0198 10

-2 -6 -10 859.962 28.5205 8

-6 -2 -10 838.998 32.0806 8

-2 -6 -10 851.997 31.0437 7

-10 6 -2 829.566 30.7316 10

-10 -6 -2 902.281 29.2462 6

-10 6 -2 804.572 28.4140 6

-10 -2 -6 821.797 31.6389 6

-10 2 -6 858.597 32.0884 6

-6 -2 -10 883.352 31.9184 6

-6 2 -10 847.923 31.4366 6

6 10 2 856.606 26.8989 30

-6 10 -2 908.219 28.7169 30

2 10 6 903.045 29.1198 30

6 10 -2 849.969 30.3765 28

6 10 2 838.675 30.1178 28

6 10 -2 847.821 28.8212 30

-2 10 6 930.500 31.3921 30

-6 10 2 930.779 30.7600 30

2 10 -6 816.593 27.6130 28

2 10 6 856.837 27.4591 28

2 6 -10 890.814 30.5160 27

-10 6 2 891.186 25.5124 30

-2 10 -6 939.250 31.1274 30

-2 10 -6 900.927 29.8915 24

2 10 -6 905.112 26.5018 24

-6 -2 10 846.038 31.4449 25

-2 -6 10 918.375 28.9244 25

-2 6 -10 880.821 28.8464 27

-6 2 10 900.425 31.9900 25

2 10 6 905.685 30.9981 26

6 10 2 942.452 29.4714 26

6 10 -2 863.349 26.0071 27

-10 -2 6 827.095 31.1769 25

-2 10 6 869.594 29.1363 26

-10 2 6 840.707 31.4572 25

6 10 -2 871.589 24.8055 26

-2 6 10 788.369 27.7084 25

-2 6 10 890.260 25.6102 26

-10 6 2 895.051 25.0947 24

2 10 -6 835.928 29.9904 27

2 -6 -10 920.086 29.1950 12

2 6 -10 873.477 29.3967 12

6 -2 -10 877.800 32.3707 12

-2 10 6 826.397 29.1962 13

10 -2 -6 898.068 33.4197 12

-6 10 -2 844.437 28.4976 13

6 2 -10 869.779 32.5034 12

-10 6 -2 873.660 25.3939 13

10 2 -6 852.669 32.9903 12

-6 10 2 901.217 30.8778 13

2 10 6 896.636 27.8152 13

2 6 -10 895.233 25.8321 22

-2 6 -10 890.203 27.0617 23

-6 10 -2 837.764 30.5199 22

-2 10 -6 898.037 30.5083 22

2 10 -6 860.789 31.1174 23

2 10 -6 884.075 26.8585 22

-6 10 -2 862.542 30.1329 23

-2 6 -10 884.620 30.2463 22

-10 6 -2 854.654 27.3854 22

-6 10 2 906.105 29.0474 23

-10 2 -6 881.161 28.7819 22

-6 10 2 885.106 30.1962 22

-10 6 -2 890.913 30.0417 23

-10 6 2 904.176 25.2888 22

-10 2 6 864.314 27.4019 21

6 10 2 911.487 33.3947 19

-2 10 -6 880.872 31.8513 20

-6 2 -10 912.436 24.7768 20

-10 6 -2 881.360 31.0140 21

2 10 6 872.075 32.9142 19

-10 6 2 835.182 30.9652 21

-6 10 -2 840.737 29.2284 21

10 6 -2 858.073 32.7713 18

-10 6 -2 862.960 29.3077 14

-10 2 -6 877.826 27.7929 15

6 10 -2 840.605 31.8269 18

10 6 2 853.498 31.3569 18

-2 10 -6 946.672 28.6202 15

-10 -2 6 848.611 26.3471 14

-6 2 -10 904.824 28.4538 15

2 10 -6 882.615 31.6959 16

2 10 -6 861.158 25.3301 15

2 10 -6 845.568 27.1026 18

-10 4 -6 401.573 18.4384 8

-10 6 -4 404.781 20.1529 10

-10 4 -6 356.591 19.8488 10

-10 -6 -4 360.015 16.1720 10

-4 -6 -10 365.049 18.5878 8

-6 -4 -10 389.071 20.8401 8

-10 -4 -6 384.421 18.9362 10

-6 4 -10 396.588 20.0058 8

-6 4 -10 386.861 17.4602 7

-4 6 -10 388.165 18.7721 8

-10 -6 -4 374.586 17.9730 6

-10 6 -4 396.917 18.7102 6

-10 -4 -6 416.877 20.4499 6

-10 4 -6 381.630 19.7080 6

4 10 -6 366.561 17.5113 28

-4 10 6 377.415 19.7638 30

6 10 4 387.004 18.8766 28

-4 6 10 418.928 18.7041 29

6 10 4 377.905 15.8812 30

-6 10 4 341.613 18.5607 30

-4 10 6 396.102 20.3175 29

4 10 6 394.645 16.7551 30

-6 10 4 360.143 19.6187 29

-6 10 -4 382.300 17.1897 30

-4 10 -6 404.247 18.5500 30

-6 4 10 353.694 15.5700 29

4 10 6 354.000 16.9242 28

6 10 -4 394.816 19.3962 28

-4 6 10 395.094 18.4157 25

-10 6 4 394.401 18.6369 25

-4 -6 10 402.806 18.6083 25

6 10 -4 385.315 17.4596 27

-6 -4 10 344.323 18.6352 25

-6 4 10 400.180 20.0201 25

4 10 -6 376.723 18.8471 27

-10 -6 4 332.928 17.0789 25

-4 10 6 373.515 17.6015 26

-6 10 -4 406.088 20.3911 24

-10 4 6 370.046 19.5942 25

-10 -4 6 360.732 19.0096 25

4 -6 -10 385.485 18.2062 12

4 6 -10 387.623 18.9300 12

10 -4 -6 380.297 20.3556 12

10 6 -4 381.643 19.1642 12

-6 10 4 361.179 19.0686 13

-10 4 -6 399.350 18.0389 14

6 4 -10 353.611 19.6786 12

-6 10 -4 389.422 17.0567 13

6 -4 -10 318.634 18.7692 12

10 4 -6 401.082 20.9972 12

-4 10 6 409.402 19.7943 13

10 -6 -4 388.776 18.9857 12

-10 4 -6 388.749 16.8134 23

-4 10 -6 382.276 19.3446 23

-6 4 -10 390.649 20.5722 22

-10 6 -4 352.075 17.7873 23

-4 10 -6 381.605 19.7376 22

-4 6 -10 390.310 20.2959 22

-10 4 -6 394.879 18.7451 22

-6 10 4 396.883 17.2184 23

-4 6 -10 379.483 16.1511 23

-10 6 -4 354.834 17.7299 22

-10 6 -4 394.671 19.2551 21

-4 6 -10 384.114 18.8797 20

-6 4 -10 373.514 16.4103 20

6 10 4 415.626 21.6150 19

-10 4 6 407.990 18.7115 21

-10 4 -6 391.540 18.6431 21

4 10 6 385.549 21.2910 19

-6 10 -4 374.742 17.1653 21

-4 10 -6 412.849 21.3160 20

-10 6 4 365.409 19.2989 21

10 6 4 364.181 17.9605 19

10 6 -4 401.099 18.1361 16

4 10 -6 350.805 14.1450 15

-10 4 -6 402.445 18.6871 15

-4 10 -6 378.797 18.0778 15

6 10 -4 380.463 20.4467 18

-6 10 -4 349.684 17.7893 15

4 10 -6 386.108 18.9400 18

-10 6 -4 370.059 17.3660 14

-6 4 -10 391.709 18.8864 15

-4 6 -10 397.040 19.4452 15

6 10 -4 375.327 20.3629 16

10 6 4 379.060 20.1566 18

4 10 -6 361.089 19.9967 16

-6 6 -10 751.927 28.4810 8

-6 -6 -10 826.555 31.6607 8

-10 6 -6 763.253 25.3289 8

-10 6 -6 779.371 30.5781 10

-10 -6 -6 836.558 29.6493 6

-10 6 -6 810.047 29.5731 6

6 10 6 793.240 27.8837 28

-6 10 -6 769.621 26.2662 30

6 10 -6 766.927 28.1868 28

-6 6 10 822.527 27.9638 29

-6 10 6 782.823 31.1732 29

-6 10 6 803.536 31.0028 30

-6 6 10 779.428 29.1427 25

-6 10 6 757.092 26.7585 26

-10 6 6 759.579 29.1314 25

-6 -6 10 790.279 28.9927 25

-10 -6 6 786.861 28.7749 25

6 10 -6 748.317 28.7513 27

-6 10 6 737.166 30.0820 13

10 -6 -6 797.143 29.7518 12

6 -6 -10 805.968 29.4027 12

6 6 -10 861.038 30.9775 12

10 6 -6 721.338 29.3449 12

-6 10 -6 802.768 31.9580 22

-10 6 -6 760.729 29.4133 22

-6 6 -10 765.892 25.0961 23

-6 6 -10 764.985 31.6772 22

-10 6 -6 800.470 28.0174 23

-6 10 -6 814.781 30.4425 23

6 10 6 791.032 32.3310 19

-6 6 -10 786.775 28.2702 20

-6 10 -6 796.330 24.7418 21

-10 6 6 828.313 30.4430 21

-6 10 -6 789.715 31.2915 20

10 6 6 854.490 28.5865 19

-10 6 -6 806.317 28.4764 21

6 10 -6 784.542 32.0991 16

-6 10 -6 784.041 29.5018 15

6 10 -6 759.338 31.0224 18

-10 6 -6 776.905 26.3701 14

-10 6 -6 770.393 29.6657 15

-6 6 -10 762.849 29.6012 15

10 6 -6 764.691 27.3901 16

-8 10 0 5.04326 3.77483 10

-10 0 -8 1.20406 4.25325 8

-10 0 -8 1.17926 4.81005 10

-10 8 0-0.94607 3.22859 9

-10 8 0 1.99966 3.86891 10

-8 10 0 1.03968 3.79303 9

-10 0 -8 6.08481 4.96386 6

0 -8 -10 0.88611 3.52281 7

-8 0 -10-1.19466 4.22004 6

-10 -8 0-0.67591 2.75698 6

-10 8 0 0.69514 2.53607 6

8 10 0 5.27107 3.96443 28

0 10 8 1.88232 3.93368 30

-8 10 0 0.78028 3.48646 30

-10 8 0-0.53162 2.86853 30

0 8 10-0.65478 2.73673 25

-8 0 10-1.15671 5.37943 25

8 10 0-2.39578 2.83855 26

0 8 -10-1.01920 3.47818 27

0 10 8 0.90583 3.40641 26

-10 0 8-1.17361 4.54138 25

8 0 -10 2.49825 4.83358 12

0 10 8 0.75685 2.84617 13

-8 10 0 0.91255 3.90387 13

10 0 -8 1.27855 5.59253 12

-10 8 0-0.81171 3.70168 13

0 8 -10-1.57966 3.45480 22

-8 10 0 0.93126 3.70232 24

-10 8 0-0.77840 3.01206 24

0 10 -8 2.08034 4.24275 23

0 8 -10 0.89050 3.34878 23

-8 10 0 1.93074 3.73556 23

-10 8 0 5.92350 4.50219 23

-8 10 0-2.15192 3.92539 21

-10 8 0-0.75643 3.23600 22

0 10 -8 0.81643 3.79695 22

-8 10 0 2.81472 4.44654 22

0 10 -8-2.34178 3.69942 15

-10 0 -8-2.45281 3.16378 15

10 8 0 2.49816 4.41227 18

0 8 -10-0.92625 3.37920 15

-8 0 -10 1.25335 2.68089 15

-8 10 -2 219.608 12.4100 10

-8 -2 -10 220.544 16.7196 8

-10 8 -2 219.024 14.9527 9

-8 10 2 246.591 14.1564 10

-10 2 -8 225.636 15.9501 8

-2 -10 -8 192.739 12.9872 7

-10 -2 -8 258.284 17.3474 10

-8 10 -2 214.696 15.2449 9

-2 -8 -10 213.502 12.5091 8

-2 -8 -10 260.132 15.9768 7

-10 8 -2 224.373 14.9487 10

-8 2 -10 233.790 14.8406 7

-8 2 -10 205.807 15.3959 8

-10 -8 2 217.209 12.9955 6

-10 8 2 212.768 12.9122 6

-10 -8 -2 215.122 12.5848 6

-10 8 -2 207.358 12.5069 6

-10 -2 -8 288.687 18.4969 6

-10 2 -8 220.326 16.4162 6

-8 -2 -10 224.247 16.4436 6

-8 2 -10 239.371 16.6556 6

2 8 10 230.791 13.3021 30

8 10 2 229.910 15.6135 28

-2 10 8 209.235 14.9444 30

8 10 -2 222.743 15.3839 28

2 10 8 230.898 14.0890 30

-10 8 2 247.904 13.3670 30

-8 10 -2 236.633 13.1733 30

-8 10 2 232.429 14.3571 30

-2 10 8 255.481 16.5621 29

-2 -8 10 230.304 12.5734 25

-2 8 10 225.615 12.9485 25

-10 8 2 225.234 12.7199 24

2 10 8 279.908 17.1035 26

-8 -2 10 215.754 15.7217 25

-10 -2 8 201.313 15.7088 25

-2 8 10 216.701 12.3820 26

-8 2 10 208.697 15.9388 25

2 10 -8 244.427 16.0075 27

-8 10 -2 263.303 16.5407 24

-10 2 8 222.867 16.2576 25

-2 10 -8 243.745 14.7550 24

-10 8 -2 243.413 14.7656 24

2 -8 10 222.627 12.4278 25

-2 10 8 221.947 13.7737 26

2 8 10 197.688 11.9855 25

-8 10 2 207.076 14.8317 13

10 2 -8 227.554 17.2930 12

-8 10 -2 227.699 13.6788 13

-2 10 8 208.404 13.9822 13

-2 8 10 233.974 13.3946 13

-10 8 -2 209.212 12.4606 13

2 10 8 243.311 12.9087 13

10 -2 -8 257.224 17.8094 12

8 2 -10 250.489 17.6770 12

8 -2 -10 231.261 17.0374 12

2 8 -10 245.410 13.4803 12

-8 10 -2 237.178 15.5106 22

2 10 -8 221.921 12.3074 22

2 8 -10 260.158 15.8182 23

-8 10 2 226.049 14.6336 23

2 10 -8 256.582 16.9894 23

-2 8 -10 222.508 14.9193 22

-2 8 -10 210.687 13.6602 23

-8 2 -10 221.211 15.8409 22

-10 2 -8 251.686 15.6201 22

-10 8 -2 230.935 14.2299 22

-2 10 -8 229.045 15.1614 22

-2 10 -8 238.756 15.6620 23

-10 8 2 255.220 13.4580 22

-8 10 -2 236.510 15.6366 23

-8 10 2 247.091 14.8921 22

-10 8 2 223.169 16.1580 21

8 10 2 228.009 17.0934 19

-8 10 -2 213.068 14.9233 21

-10 8 -2 214.524 15.2764 21

-2 10 -8 218.870 16.0629 20

10 8 2 254.257 16.9016 19

2 10 8 230.778 17.0609 19

8 10 2 211.578 16.5237 18

8 10 -2 209.721 16.5486 18

10 8 2 225.504 16.6556 18

2 10 -8 223.511 12.8184 15

-2 10 -8 225.566 14.1602 15

10 8 -2 193.743 15.8921 18

2 10 -8 231.809 13.2858 18

-8 2 -10 221.298 13.3281 15

-2 8 -10 217.068 14.8902 15

-10 2 -8 206.940 12.8623 15

-4 -8 -10 2.61803 3.81796 8

-8 -4 -10 5.28164 5.38634 8

-10 8 -4 4.85660 4.06046 10

-8 10 -4 2.53169 2.94449 10

-8 4 -10 6.52873 4.65558 8

-10 4 -8 12.0155 6.19979 10

-10 4 -8 2.98739 4.06246 8

-10 -8 -4 5.66927 3.42098 6

-10 8 -4 3.76885 3.50635 6

-10 -4 -8 1.14869 4.80167 6

-10 4 -8 4.62344 4.47334 6

-8 4 -10 4.47696 3.91020 7

-8 -4 -10 4.57123 4.99936 6

-8 4 -10 6.75457 4.92481 6

-4 -8 -10 9.20069 5.13938 7

-4 10 8 1.13516 4.51360 30

-4 10 8 4.56829 4.03500 29

-8 10 -4 5.72158 3.75850 30

8 10 -4 4.12275 4.70090 28

8 10 4 3.98795 4.16772 28

-4 8 10 7.20466 4.40372 29

4 10 -8 2.10853 3.07527 28

4 10 8 3.48007 3.41942 30

-8 10 4 5.04797 4.01448 30

-10 8 4 5.88736 4.40729 30

8 10 -4 4.63648 3.79622 27

-10 4 8 6.84864 5.20591 25

-8 4 10-1.12579 5.43381 25

-8 -4 10 1.10638 4.62488 25

-10 -4 8 2.22711 4.76436 25

4 10 -8 8.74590 4.45985 27

-4 10 8 5.62715 3.66675 26

-4 8 10 4.76083 3.07135 26

4 8 -10 3.35800 4.08434 27

-4 8 10 3.72415 3.46479 25

-4 -8 10 0.71068 3.43072 25

-8 10 -4 4.16381 3.10173 13

-10 4 -8 3.82680 3.19982 14

8 4 -10 4.88074 5.22047 12

10 -4 -8 3.59576 5.24332 12

4 8 -10 3.95031 3.94757 12

-4 10 8 2.02789 4.43578 13

10 4 -8 12.4049 5.87948 12

8 -4 -10 9.40894 5.47024 12

4 -8 -10 8.10555 4.03316 12

10 8 -4 4.86227 4.18179 12

10 -8 -4 1.51089 3.51414 12

-4 8 -10 3.36576 3.25691 23

-8 10 -4 10.0719 5.49715 24

-4 10 -8 7.17490 4.67491 23

-4 8 -10 6.80324 5.06695 22

-10 8 -4 5.03014 4.20550 23

-10 4 -8 4.31108 4.61130 22

-4 10 -8 6.79059 4.50010 22

-8 10 -4 9.01741 5.72451 22

-10 8 4 4.65663 4.86633 21

-8 4 -10 4.86458 3.18687 20

-4 8 -10 1.10717 4.03997 20

-10 8 -4 0.99336 4.05254 21

10 8 4 10.6337 5.57197 19

-10 4 8 6.30631 3.80521 21

-8 10 -4 3.59504 4.33827 21

8 10 4 6.18965 5.17464 19

4 10 8 2.56973 4.38546 19

-10 8 -4 7.03570 4.20163 22

10 8 4 6.32618 5.53482 18

-4 10 -8 2.94862 4.00975 15

8 10 -4 11.7522 6.07328 18

-8 4 -10 4.72894 3.85852 15

8 10 -4-1.17610 4.79778 16

4 10 -8 7.33317 3.79792 15

10 8 -4 4.11399 5.30701 18

-10 4 -8 3.73518 4.08524 15

10 8 -4 2.00587 3.98800 16

-6 -10 -8 89.9460 9.37343 8

-8 -6 -10 79.7167 10.8533 8

-10 6 -8 68.6342 8.40344 8

-8 6 -10 80.1068 9.57478 8

-6 -8 -10 75.6481 9.61497 8

-10 8 -6 48.8146 8.57996 10

-10 6 -8 63.1970 9.23367 10

-10 -8 -6 75.4196 8.22614 6

-10 8 -6 60.6912 8.13564 6

-10 -6 -8 65.8940 8.89630 6

-10 6 -8 90.8015 10.2598 6

-8 10 6 76.2268 9.88037 30

-6 8 10 82.0256 9.84131 29

8 10 -6 79.9804 9.23736 28

-8 6 10 67.4772 7.96043 29

-8 10 6 75.3809 10.3819 29

6 10 8 83.5170 8.17939 28

8 10 6 99.8122 10.3320 28

-10 8 6 76.9888 9.45078 30

6 10 -8 64.8034 7.71098 28

-6 10 8 81.5748 10.3508 29

-10 -6 8 69.7523 9.30279 25

8 10 -6 78.9560 9.12154 27

-10 6 8 74.2198 9.79466 25

-6 -8 10 66.7263 8.24192 25

-6 8 10 76.7773 9.00896 25

6 10 -8 92.4855 10.2194 27

-8 6 10 76.0629 10.1013 25

-8 -6 10 78.8216 9.83040 25

-6 10 8 59.7412 7.39824 26

6 8 -10 60.4287 9.26701 27

6 -8 -10 69.2178 8.57490 12

6 8 -10 75.7917 8.94249 12

10 -8 -6 69.1584 8.39751 12

-10 6 -8 58.3467 7.14391 14

8 6 -10 57.4964 9.12087 12

10 8 -6 75.8140 8.97451 12

10 -6 -8 62.8692 9.42453 12

10 6 -8 85.1470 10.7345 12

8 -6 -10 62.7807 9.35776 12

-6 10 8 72.5024 10.2620 13

-8 10 6 55.3019 8.99665 13

-10 8 -6 75.9111 10.3651 22

-6 10 -8 91.7813 10.3421 23

-8 10 -6 82.3726 10.0564 23

-10 6 -8 69.8633 10.0466 22

-10 6 -8 74.5594 8.36299 23

-6 8 -10 87.4328 8.99515 23

-10 8 -6 101.227 10.3477 23

-8 6 -10 77.4293 7.75714 23

-6 10 -8 77.2318 10.7301 22

-6 8 -10 69.1025 10.3945 22

-8 10 -6 64.7393 9.81050 20

6 10 8 86.7132 11.2781 19

-8 6 10 73.3717 8.21875 21

8 10 6 88.6498 10.8861 19

-8 10 -6 74.9333 8.41984 21

-6 10 -8 79.3161 10.4667 20

-8 6 -10 76.2586 8.52423 20

-10 8 6 80.2463 10.4787 21

-6 8 -10 114.071 11.3529 20

-10 6 8 87.0135 9.68607 21

-10 8 -6 61.4615 8.43252 21

10 8 6 81.2025 9.68250 19

10 8 -6 70.2988 9.32520 16

-10 8 -6 79.8915 10.2171 15

-8 6 -10 80.4395 9.98828 15

6 10 -8 72.3574 7.38569 15

-6 10 -8 91.0566 10.3159 15

-6 8 -10 95.1323 10.8457 15

8 10 -6 74.2358 10.6495 18

-10 6 -8 104.259 10.8171 15

-8 10 -6 82.4042 10.1237 15

8 10 -6 113.900 12.1016 16

-8 -10 -8 5.26058 4.70308 8

-8 -8 -10 10.0274 5.71771 8

-10 8 -8 11.1933 5.87139 10

-10 -8 -8 14.5296 5.17262 6

-10 8 -8 7.35165 4.19301 6

10 8 -8 6.70568 4.25880 28

10 8 8 6.20106 3.31886 28

8 10 -8 6.94411 4.19148 28

-8 10 8 10.1090 5.52899 30

-8 8 10 10.2105 4.75056 29

8 10 8 3.17026 3.68852 28

-8 10 8 6.10055 5.78403 29

-8 -8 10 7.91988 4.88401 25

8 10 -8 10.3663 5.04006 27

-10 8 8 9.37693 4.68636 25

-8 8 10 5.55109 4.22139 25

-10 -8 8 11.5831 5.14156 25

8 -8 -10 6.40403 4.25693 12

8 8 -10 9.77437 5.27591 12

10 -8 -8 15.4680 5.25039 12

10 8 -8 7.79922 4.79034 12

-8 10 8 9.20016 5.87420 13

-8 8 -10 11.0705 4.46391 23

-10 8 -8 12.9663 6.99777 22

-10 8 -8 7.65019 4.77914 23

-8 10 -8 5.46359 4.78167 23

-8 8 -10 6.87052 6.39195 22

10 8 8 3.00988 4.57743 19

-8 8 10 2.88786 4.12036 21

-8 10 -8 11.0418 5.48362 20

-8 10 8 3.64301 5.42765 21

-8 8 -10 2.08326 4.55830 20

-10 8 8 11.1230 5.27326 21

8 10 8 8.80795 5.85343 19

-8 8 -10 16.0336 6.26468 15

8 10 -8 4.33702 5.59583 18

-10 8 -8 9.89927 5.29539 15

0 -10 -10 317.754 16.8744 7

-10 10 0 347.374 18.4141 10

-10 10 0 322.261 19.4613 9

-10 0 -10 319.037 21.1171 8

-10 0 -10 359.745 22.3691 6

0 10 10 346.099 19.2954 30

-10 10 0 337.286 15.8973 30

0 10 10 323.162 17.8155 26

-10 0 10 314.408 20.6716 25

10 10 0 322.594 14.1540 26

0 10 -10 321.143 15.9903 24

-10 10 0 321.086 17.9520 24

10 0 -10 312.992 21.4263 12

-10 10 0 319.287 18.1289 13

0 10 10 359.329 16.6691 13

0 10 -10 346.849 19.8103 23

-10 10 0 317.488 19.3123 23

-10 10 0 322.719 18.0347 22

0 10 -10 348.762 17.9025 22

-10 10 0 338.226 20.7134 21

10 10 0 326.697 22.0029 18

-10 0 -10 315.472 15.2163 15

0 10 -10 324.845 18.0249 15

-10 10 2 663.425 29.2276 9

-2 -10 -10 680.371 27.5067 7

-10 10 -2 665.859 26.0887 10

-10 10 2 637.174 27.2423 10

-10 -2 -10 616.559 31.3900 8

-10 10 -2 685.794 29.4415 9

-10 2 -10 674.891 27.2190 7

-10 2 -10 730.275 31.6232 8

-10 -2 -10 710.037 32.4172 6

-10 2 -10 692.845 31.5128 6

-2 10 10 673.037 29.9155 29

-10 10 2 709.514 26.0882 30

2 10 10 681.808 26.3416 30

-2 10 10 727.256 30.0678 30

2 10 -10 671.754 29.8432 27

2 10 10 752.658 29.9500 26

-10 2 10 677.882 30.7910 25

-10 10 -2 638.351 27.8052 24

-2 10 10 708.840 26.2391 26

-2 10 -10 700.359 27.0918 24

-10 -2 10 633.621 29.9147 25

-2 10 10 665.010 26.0976 13

10 2 -10 668.141 32.1949 12

-10 10 2 721.929 29.3097 13

-10 10 -2 708.302 25.8061 13

10 -2 -10 719.293 32.6729 12

-2 10 -10 695.034 28.4806 23

2 10 -10 706.387 30.1069 23

-2 10 -10 700.141 28.6848 22

-10 10 -2 680.339 28.3028 22

-10 10 2 707.950 26.8468 22

-10 10 -2 763.826 30.6496 23

-10 2 -10 733.782 30.6796 22

10 10 2 654.592 30.6757 19

-10 10 -2 682.844 29.5138 21

-10 2 -10 707.292 26.1192 15

10 10 -2 674.380 29.5397 16

2 10 -10 693.824 26.7559 15

10 10 -2 685.131 32.5172 18

10 10 2 711.989 33.0685 18

-2 10 -10 700.637 28.5276 15

-10 4 -10 34.2200 7.85476 8

-10 10 -4 24.8555 5.97922 10

-10 4 -10 27.8378 7.94763 10

-10 -4 -10 29.0449 8.49909 8

-4 -10 -10 19.7054 6.87397 7

-10 -4 -10 28.5914 7.13361 6

-10 4 -10 22.1904 6.75751 6

10 10 -4 42.9410 7.94061 28

10 10 4 32.7369 7.37369 28

-4 10 10 47.2899 8.66298 30

-4 10 10 38.3949 8.08627 29

-10 10 4 31.9946 6.84665 30

10 10 -4 23.2039 5.35485 27

4 10 -10 35.4537 7.85229 27

-4 10 10 31.0485 5.73465 26

-10 4 10 25.7766 7.17178 25

-10 -4 10 26.5557 7.58341 25

-10 4 -10 35.2203 5.86745 14

10 4 -10 23.7030 7.54385 12

10 -4 -10 29.5785 8.15295 12

-4 10 10 25.9925 6.31459 13

-10 10 4 42.9055 8.15862 13

-10 10 -4 24.0346 7.53466 24

-10 4 -10 35.9935 8.05702 22

-10 10 -4 36.3913 7.88745 23

-4 10 -10 29.8530 7.37329 22

-4 10 -10 30.5300 6.87951 23

-10 10 -4 29.9424 6.91897 21

10 10 4 36.6228 7.93253 19

-4 10 -10 35.5647 8.34192 20

-10 10 4 32.1891 8.40469 21

-10 10 -4 34.2776 8.08646 22

4 10 -10 29.9142 6.01339 15

-4 10 -10 32.1826 7.28408 15

-10 4 -10 47.0042 7.59173 15

10 10 -4 41.1780 8.43081 16

-10 6 -10 587.533 25.0792 8

-10 10 -6 615.068 23.7896 10

-10 -6 -10 653.472 31.8301 8

-6 -10 -10 577.367 24.3705 8

-10 -6 -10 634.651 27.5782 6

-10 6 -10 638.053 28.1011 6

10 10 -6 643.088 27.0023 28

10 10 6 594.403 25.4720 28

10 10 -6 592.864 25.0962 27

-10 10 6 636.389 27.4180 30

-6 10 10 639.757 30.0056 30

-6 10 10 607.170 28.0969 29

6 10 -10 526.277 27.0247 27

-10 6 10 589.788 27.2729 25

-10 -6 10 586.168 26.9949 25

10 6 -10 581.765 27.9035 12

-6 10 10 645.377 28.4091 13

10 -6 -10 611.206 28.0136 12

-6 10 -10 615.873 26.2208 23

-6 10 -10 643.962 30.2223 22

-10 10 -6 568.401 27.9222 22

-10 6 -10 585.261 21.5522 23

-10 6 -10 540.438 27.8182 22

-10 10 -6 610.369 27.3004 23

-6 10 -10 659.142 29.6775 20

-10 6 10 612.442 23.9721 21

10 10 6 591.412 27.6654 19

-10 10 -6 587.095 24.3240 21

-10 10 6 636.538 29.8826 21

-6 10 -10 515.989 26.3507 15

-10 6 -10 599.905 27.3838 15

6 10 -10 578.457 22.9373 15

10 10 -6 556.583 29.9005 18

10 10 -6 615.699 28.0620 16

-8 -10 -10 206.192 14.9488 8

-10 -8 -10 158.381 15.3801 8

-10 -10 -8 160.418 14.4856 8

10 10 -8 172.116 14.0053 27

-8 10 10 181.031 14.8642 29

8 10 -10 140.974 14.0236 27

10 10 -8 194.086 13.4277 28

10 10 8 180.037 12.6334 28

-10 10 8 182.915 15.5393 30

-8 10 10 200.436 16.3708 30

-10 8 10 141.743 12.6016 25

-10 -8 10 153.138 12.7865 25

-10 8 -10 175.642 16.1964 22

-10 10 -8 177.631 15.9857 22

-10 8 -10 205.156 13.2080 23

-8 10 -10 189.654 13.8444 23

-10 10 -8 190.078 14.5374 23

-8 10 -10 210.174 17.3965 22

8 10 -10 181.924 16.9081 18

-10 8 -10 186.293 15.5918 15

10 10 -8 162.848 16.4341 18

-10 8 10 189.032 13.8952 21

-8 10 10 165.739 13.9275 21

-8 10 -10 205.334 15.7748 20

-10 10 8 154.905 14.4279 21

10 10 8 203.018 15.4429 19

10 8 -10 191.420 14.6625 12

10 -8 -10 154.040 12.9653 12

-8 10 10 194.733 15.9545 13

-10 10 8 233.919 17.7471 13

-10 -10 -10 482.555 23.9820 8

10 10 -10 503.162 24.6571 27

-10 10 10 467.564 24.5783 30

-10 10 10 495.456 26.4066 13

-10 10 -10 500.563 22.0756 23

-10 10 -10 545.973 27.5889 22

-10 10 10 479.676 22.9908 21

-10 10 -10 477.490 25.1848 15

10 10 -10 489.226 27.5125 18

1 11 1 766.205 22.0856 9

-11 -1 -1 745.665 27.7558 10

-1 1 -11 800.218 29.6217 8

-1 11 1 768.663 24.2123 9

1 11 -1 761.746 22.1288 9

-1 11 -1 746.522 23.9151 9

-11 1 -1 737.032 28.4731 10

-11 1 1 776.180 28.9909 10

-1 1 -11 767.989 28.5640 7

-1 -1 -11 793.358 29.1845 8

-11 -1 1 802.801 28.2956 10

-11 -1 -1 803.242 29.7085 6

11 -1 -1 769.965 22.3326 3

1 1 -11 776.627 21.9288 3

-1 11 -1 744.794 24.5952 29

1 11 -1 751.319 22.9817 29

1 11 1 777.493 24.7593 29

-1 11 1 757.267 25.9986 29

1 11 -1 819.471 28.3612 30

-1 11 1 784.438 27.9072 30

-1 1 -11 765.430 22.0470 27

1 11 1 774.525 27.7311 28

1 11 1 735.194 26.9522 30

-1 -1 11 761.028 27.9057 25

1 11 -1 817.278 26.6918 26

-1 11 -1 771.153 26.9651 26

1 11 1 793.517 27.0889 26

1 -1 -11 788.245 28.9229 12

1 11 1 752.411 27.3634 13

-1 11 1 770.480 27.7846 13

-11 1 -1 821.101 28.7185 14

-11 -1 1 815.193 27.8661 14

-1 -1 -11 865.156 29.8808 12

-1 11 1 781.067 25.0563 23

1 11 -1 795.118 26.5704 23

1 11 -1 796.426 26.8519 22

-1 11 -1 776.058 26.4346 23

-1 11 -1 821.769 28.0599 22

-1 11 1 888.131 29.1978 22

1 11 1 756.703 24.3409 23

1 11 -1 799.055 27.9286 19

-11 1 1 768.676 27.7056 21

1 11 1 834.206 29.1755 19

1 11 -1 863.181 25.7903 20

-1 11 1 791.377 27.2751 19

-11 1 -1 797.288 28.7846 21

-1 11 -1 841.482 26.9994 20

1 11 1 820.817 23.7862 20

-1 11 -1 782.395 25.9458 19

-1 11 -1 777.608 25.0180 16

1 11 -1 765.973 26.7390 16

11 1 1 822.405 25.3354 18

-11 1 1 807.876 28.2912 14

1 11 -1 795.779 25.2296 18

-1 3 -11 0.98180 4.20041 8

-11 -3 1 6.26124 3.77756 10

-11 3 -1 3.99851 2.69735 9

-11 -3 -1 1.61680 3.53636 10

-11 3 1 4.09633 4.28054 10

1 -3 -11 2.55081 4.10386 8

-11 3 1 10.4336 3.07377 9

-11 1 -3 0.98577 3.11492 10

-11 -1 -3 0.93388 3.80949 10

-1 -3 -11 1.79269 3.46881 8

-3 11 -1 4.40134 2.91673 9

-3 -1 -11 3.97361 4.62021 8

3 11 1 2.64734 2.46284 4

1 -3 -11 2.94491 4.38640 7

-1 -3 -11 3.99701 3.97292 7

3 -1 -11 6.22011 2.36334 3

-11 -3 -1 3.84408 4.29429 6

-11 3 -1 1.96437 3.90508 6

-11 -1 -3 4.06175 4.34428 6

-3 1 -11 1.85979 3.79323 7

-1 11 -3 0.88245 3.94326 30

3 11 1 3.12381 2.42177 29

3 11 -1 1.68566 3.43815 30

1 11 -3-1.70696 3.39345 28

-1 11 3 2.67063 3.44506 30

-1 11 3 1.65044 3.19362 29

1 11 3 5.15468 3.49023 29

1 11 3-1.67164 3.88740 30

1 11 -3 1.79739 3.93128 30

1 11 3-0.82617 3.10721 28

3 11 1 2.67966 3.90734 28

3 11 1 4.01043 3.80158 30

-3 11 -1 3.40021 3.79850 30

-3 11 1 4.35717 3.81206 30

-3 11 1 0.83324 3.04028 29

3 11 -1 25.2797 5.02428 26

-3 -1 11 4.64395 3.97363 25

1 11 -3 2.72900 3.04881 26

-1 3 -11 4.06423 3.04242 27

-11 -1 3 2.88721 4.20994 25

-3 11 1 0.85121 3.64177 26

-1 11 3 4.25912 3.38686 26

-1 3 11 0.87168 3.55581 25

-1 -3 11 2.57930 3.99877 25

3 11 1 2.24501 3.54688 26

3 -1 -11 0.99324 4.24932 12

-1 11 3-1.70105 3.72062 13

-11 -1 3 1.54021 3.58181 14

-11 1 3 9.12845 4.41363 14

-11 3 1 0.89395 3.55432 14

1 11 3 3.24265 3.62251 13

-3 11 -1 5.11518 4.46703 13

1 -3 -11 3.64320 4.31676 12

1 3 -11 13.0697 5.38531 12

-1 3 -11 3.69093 4.29157 12

-1 -3 -11 2.70215 3.94013 12

-11 1 -3 2.67357 2.26332 22

-1 11 -3 0.80260 3.73290 24

-3 11 1 2.11468 2.87558 23

-1 11 3 2.60608 2.64726 23

-3 11 -1 3.51732 4.01032 24

-1 11 -3 4.24930 4.10188 23

1 11 -3 5.08433 3.94120 23

3 11 -1 1.47399 3.08072 23

3 11 1 1.78460 2.87136 23

-3 11 -1 0.80056 3.18307 23

-3 11 -1 0.56782 2.69147 19

3 11 -1 1.94988 3.44423 19

1 11 -3 7.05511 3.98108 19

3 11 1 2.04343 3.95390 19

-3 11 1 1.80648 3.95117 22

1 11 -3 4.52424 3.36954 20

-1 11 -3 0.84722 3.18638 20

-1 11 -3 6.77023 3.41493 19

1 11 3 0.99058 3.61421 19

1 11 -3 5.06815 3.49461 22

-11 3 1 1.81135 4.13046 21

-3 11 1 4.91125 3.38644 19

3 11 -1 6.35239 3.01558 20

-3 11 -1 0.84089 3.59763 20

-1 11 -3-0.82162 3.35165 22

-11 3 -1 4.64014 4.23239 21

-11 1 3 11.0199 4.48367 21

-1 11 3 1.82175 3.32346 19

-3 11 -1 0.90072 3.67424 22

-3 11 -1 6.79671 2.87001 16

-1 11 -3 0.71459 2.76559 16

1 11 -3 4.23321 3.86127 16

-1 11 -3-0.44748 2.19837 15

3 11 -1 4.90664 3.57736 18

11 3 -1 5.93371 3.70814 18

3 11 1 0.88533 3.23027 18

-3 -1 -11 2.90941 2.60041 15

11 3 1 16.2626 4.79069 18

-3 1 -11 0.68778 2.73477 15

1 11 -3-0.58668 2.39350 18

-3 3 -11 538.333 24.0167 8

-3 3 -11 485.896 21.3399 7

-3 11 -3 497.230 20.6251 9

-11 -3 3 499.283 20.7237 10

-3 -3 -11 541.119 23.5092 8

-11 -3 -3 481.904 21.2710 10

-3 -3 -11 509.068 23.4485 7

-11 -3 -3 520.686 23.1399 6

-11 3 -3 480.702 22.6865 6

3 11 -3 508.242 22.2764 30

3 11 -3 502.940 22.1541 28

3 11 3 507.887 19.5052 29

-3 11 -3 454.929 20.8953 30

3 11 3 501.079 21.7237 28

-3 11 3 475.781 21.8541 29

3 11 3 499.599 20.7704 30

-3 3 11 461.146 21.7198 25

-3 -3 11 468.282 21.5359 25

3 11 3 507.359 21.3858 26

-3 11 3 500.193 21.6196 26

-3 11 -3 501.619 21.8574 24

3 11 -3 488.839 18.6802 26

3 3 -11 537.642 23.4749 12

-3 11 -3 484.482 20.9479 13

3 -3 -11 541.876 23.5544 12

-3 11 3 494.283 22.0384 13

3 11 -3 508.662 21.9009 23

-3 11 -3 518.932 22.1520 23

-3 11 3 459.998 18.1552 23

-3 11 -3 545.564 23.0958 22

-11 3 -3 444.911 17.1372 22

3 11 -3 530.721 19.3193 22

-3 11 -3 515.183 22.7649 20

3 11 -3 547.092 20.1146 20

-11 3 3 505.516 21.7607 21

-11 3 -3 517.478 22.8518 21

-3 3 -11 498.338 20.8880 15

-3 -3 -11 463.870 16.5214 15

3 11 -3 463.657 20.1439 18

11 3 3 543.992 21.4425 18

-11 3 -3 490.782 21.6856 14

3 11 -3 510.806 22.9469 16

-11 -3 3 485.318 19.8847 14

-11 3 3 488.371 21.8821 14

-3 11 -3 473.234 17.9365 15

-1 -5 -11 25.3271 5.82788 8

-5 11 -1 19.0273 5.30740 9

-11 5 1 27.3850 6.86164 10

-5 11 1 11.8752 4.80368 9

-11 5 -1 30.4289 5.47792 9

-11 5 -1 16.1129 5.81076 10

-5 -1 -11 27.4919 6.81491 8

-11 -5 1 28.6968 5.10915 10

-11 -5 -1 26.3981 5.20250 10

-11 1 -5 32.5929 7.42657 10

-11 -1 -5 30.2360 6.86962 10

-11 5 1 20.6379 4.87744 9

-5 1 -11 36.9578 7.10829 7

-1 -5 -11 28.0321 6.22303 7

1 -5 -11 25.8174 6.54373 7

-5 -1 -11 25.2031 6.50902 7

-11 -5 -1 26.0717 5.77455 6

-11 5 -1 27.7067 5.98806 6

-11 -1 -5 22.3243 6.28920 6

1 11 5 19.8384 5.13420 28

5 11 1 15.5602 5.33782 28

1 11 5 24.9009 5.51659 29

-5 11 1 29.2975 6.09305 30

-1 11 -5 16.5999 5.71741 30

-1 11 5 28.7023 5.93261 29

5 11 -1 32.6086 6.12659 30

1 11 -5 20.0393 5.18139 28

5 11 1 27.6292 5.59214 30

-1 11 5 11.5429 5.63265 30

1 11 5 26.5653 5.94915 30

-5 11 -1 15.6124 5.14326 30

1 11 5 26.2825 5.80077 26

5 11 1 14.9038 4.72675 26

1 5 -11 47.0120 6.94569 27

-11 -1 5 12.7768 5.24570 25

-1 11 5 24.2684 5.86889 26

5 11 -1 19.4515 4.56093 26

-1 5 -11 20.4252 4.74799 27

-5 -1 11 17.6498 5.69640 25

-1 -5 11 29.8613 5.99124 25

-1 5 11 24.1819 5.64025 25

-11 5 -1 25.8081 6.19127 14

-11 -1 5 30.1321 5.96431 14

1 -5 -11 27.0500 6.22937 12

-1 -5 -11 31.1889 6.13446 12

-1 5 -11 32.6864 6.48082 12

1 11 5 31.5452 6.18592 13

-5 11 -1 18.6939 5.75573 13

1 5 -11 21.2286 5.84678 12

-5 11 1 22.7441 5.61661 13

5 -1 -11 8.86589 5.55152 12

-11 1 5 21.8392 5.21221 14

-1 11 5 24.5145 5.66139 13

-11 5 1 19.6086 3.69840 24

1 5 -11 26.4270 4.94941 22

-5 11 1 21.1296 5.41176 23

-5 11 -1 34.2056 6.31954 23

5 11 1 18.5937 4.47003 23

-11 -1 -5 30.1112 4.99940 22

-1 5 -11 22.2972 5.06933 22

1 11 -5 21.6461 5.76079 23

-11 1 -5 21.3472 4.55049 22

1 11 -5 25.9332 5.31299 24

1 5 -11 18.4536 4.40096 23

-1 11 -5 19.8230 5.18087 24

-1 5 -11 28.2145 4.89985 23

-1 11 -5 27.0994 6.37872 23

1 11 -5 19.2166 4.92476 22

-1 11 5 24.5497 6.39701 19

-1 11 -5 17.2462 4.92873 22

1 11 -5 18.7397 4.99415 19

-5 11 1 17.2850 5.75792 22

-11 5 -1 17.8940 3.88443 22

1 11 -5 22.7864 5.89258 20

-1 11 -5 23.6405 6.23788 20

-11 5 1 29.2169 6.37950 21

-1 11 -5 21.9028 4.42986 19

-11 1 5 29.5538 5.57209 21

5 11 -1 19.2111 6.02394 19

-5 -1 -11 24.8438 4.52104 15

1 11 -5 24.9743 6.08359 16

-5 1 -11 39.0683 5.98719 15

1 11 -5 18.1386 4.15626 18

-1 11 -5 26.0234 4.59565 15

11 5 -1 25.2120 6.65079 18

11 5 1 29.2765 6.36965 18

5 11 -1 15.2896 5.43644 18

-1 5 -11 22.7325 5.93692 15

5 11 1 24.5557 6.61712 18

1 11 -5 24.3812 4.42188 15

-3 5 -11 689.502 27.5169 8

-11 5 -3 644.780 27.6157 10

-11 -5 3 652.872 22.8668 10

-3 -5 -11 616.313 27.4299 7

-11 -5 -3 663.698 24.1788 10

-5 -3 -11 649.315 27.9151 8

-5 3 -11 663.875 27.8851 8

-3 -5 -11 651.831 26.1909 8

-5 11 -3 656.561 26.1806 9

-11 -3 -5 643.393 26.3063 10

-5 3 -11 678.608 25.8845 7

-11 -5 -3 602.242 25.5813 6

-11 5 -3 627.059 26.2008 6

-11 -3 -5 706.698 28.3484 6

-11 3 -5 639.427 27.5990 6

5 11 3 654.250 22.2746 29

-11 5 3 685.117 21.3633 30

5 11 3 679.506 24.1030 30

-5 3 11 624.118 21.1635 29

5 11 -3 617.800 25.6422 30

5 11 -3 693.132 27.3958 28

-5 11 -3 692.330 25.7691 30

3 11 -5 627.900 26.7311 30

5 11 3 637.940 26.0310 28

-5 11 3 629.162 26.2747 30

3 11 -5 687.810 26.0923 28

3 11 5 691.074 25.4199 28

-3 11 -5 623.615 25.7602 30

-3 11 5 688.054 27.5487 30

3 11 5 667.647 24.6193 30

-11 3 5 621.526 26.7733 25

-3 5 11 647.922 25.8179 25

-5 -3 11 723.775 28.2004 25

-5 3 11 651.265 27.1436 25

5 11 -3 660.504 23.4590 27

-11 -3 5 612.922 26.4846 25

5 11 3 624.568 25.1028 26

-3 -5 11 661.076 26.0061 25

5 11 -3 620.312 20.8837 26

-5 11 -3 664.375 27.1662 24

-3 11 5 628.508 25.3103 26

-3 11 -5 673.204 26.5504 24

3 11 -5 709.423 26.5761 27

3 -5 -11 656.703 25.8581 12

5 3 -11 605.843 27.1904 12

-11 -5 3 678.276 23.4618 14

-11 3 -5 656.469 25.8288 14

-5 11 -3 643.617 24.7174 13

3 5 -11 667.159 26.6836 12

-3 11 5 664.951 26.5579 13

-5 11 3 625.466 26.3332 13

11 3 -5 700.319 29.3906 12

11 -3 -5 676.669 28.9222 12

5 -3 -11 659.800 27.6932 12

-3 5 -11 654.404 26.5945 22

-3 11 -5 630.631 26.3411 22

3 11 -5 683.940 27.5125 23

-5 11 -3 608.347 26.4750 22

-5 3 -11 639.900 27.1297 22

-3 11 -5 626.253 26.4292 23

-5 11 -3 641.673 26.3884 23

-5 11 3 608.231 23.0158 23

-11 3 -5 651.948 23.7340 22

3 11 -5 672.641 22.3631 22

-3 5 -11 664.851 21.0519 23

-11 5 -3 681.442 23.3959 22

-5 3 -11 651.750 22.3797 20

5 11 -3 651.712 22.0894 20

-5 11 -3 636.765 23.9935 21

5 11 3 628.223 28.5048 19

-5 11 -3 691.903 28.1809 20

3 11 5 638.662 28.6008 19

-3 11 -5 613.083 20.4643 21

-11 3 5 628.097 24.6965 21

-11 5 -3 652.335 26.7738 21

-11 5 3 660.875 26.9826 21

11 5 3 632.794 23.7708 19

-3 11 -5 682.593 28.3302 20

11 5 -3 652.424 22.8514 16

5 11 -3 643.796 26.6532 18

-5 11 -3 650.174 23.8254 15

11 5 3 688.238 27.0397 18

-11 -3 5 617.285 22.5431 14

-11 5 -3 657.911 25.4322 14

-3 11 -5 648.880 23.4438 15

3 11 -5 623.343 23.9351 18

-5 3 -11 706.003 25.7431 15

3 11 -5 714.633 28.5832 16

-3 5 -11 610.390 25.5115 15

-11 5 -5 668.716 24.0713 8

-11 5 -5 751.232 30.3356 10

-11 -5 -5 663.600 25.5859 10

-5 5 -11 670.156 27.9329 8

-5 -5 -11 684.416 28.6963 8

-5 -5 -11 631.537 29.2228 7

-11 -5 -5 695.129 27.8340 6

-11 5 -5 691.068 28.3653 6

-5 11 -5 662.130 25.6797 30

5 11 5 665.076 23.8358 30

5 11 -5 637.501 26.6096 28

5 11 5 749.903 27.4587 28

-5 11 5 718.279 29.6755 29

-5 5 11 629.506 23.8474 29

-5 11 -5 724.813 29.1432 24

-5 5 11 682.035 27.7354 25

-5 -5 11 716.020 28.0581 25

5 11 5 768.482 29.1361 26

5 11 -5 713.845 26.7047 27

-11 5 5 640.595 27.1803 25

-11 -5 5 680.196 27.2111 25

-5 11 5 647.338 25.8769 26

5 -5 -11 632.993 27.0892 12

5 5 -11 679.065 28.1012 12

-5 11 5 649.273 27.8001 13

11 5 -5 709.428 29.0704 12

11 -5 -5 692.635 28.6153 12

-5 11 5 676.615 23.1554 23

-5 11 -5 665.499 28.7976 22

-5 5 -11 679.056 29.2674 22

-5 5 -11 644.898 20.8134 23

-11 5 -5 682.279 25.9011 22

-5 5 -11 712.042 25.9132 20

-5 11 -5 747.688 30.1063 20

5 11 5 727.807 31.0826 19

-5 11 -5 642.774 22.7520 21

-11 5 5 710.475 28.1100 21

-11 5 -5 644.595 26.7156 21

5 11 -5 681.371 27.7125 18

-5 11 -5 637.911 25.3214 15

-11 5 -5 650.739 25.3661 14

-5 5 -11 677.507 27.3326 15

11 5 -5 676.474 23.5092 16

5 11 -5 728.128 30.5675 16

-7 1 -11 388.091 20.8266 7

-1 -7 -11 425.051 18.7293 8

-11 7 1 454.813 20.6252 9

-7 1 -11 427.486 22.9276 8

-11 1 -7 411.377 22.8552 10

-11 7 -1 429.815 22.0982 10

-1 -7 -11 441.833 21.9131 7

-11 7 1 442.388 22.7208 10

-7 -1 -11 403.719 22.6896 8

1 -7 -11 417.190 20.6494 7

-7 -1 -11 369.734 21.0876 7

-11 7 -1 431.727 20.1196 9

-11 -1 -7 428.553 23.0617 10

-11 -7 1 399.475 19.4338 6

-11 7 1 416.937 19.7927 6

-11 -7 -1 397.582 19.2879 6

-11 7 -1 436.394 19.8711 6

-11 -1 -7 417.185 23.2098 6

-7 -1 -11 457.130 23.7186 6

1 11 7 472.503 22.6237 29

7 11 -1 420.923 19.3183 30

7 11 1 437.876 22.0693 28

7 11 1 417.506 18.4296 30

1 11 7 436.656 20.6327 30

-7 11 -1 394.897 19.2426 30

-7 11 1 487.202 21.5825 30

-1 11 7 436.761 21.7967 30

-11 7 -1 440.947 19.2441 24

-1 -7 11 428.304 19.1133 25

-1 7 11 406.427 19.0545 25

1 7 -11 431.160 21.4451 27

-1 11 7 419.292 20.3846 26

-7 -1 11 441.352 23.1857 25

-1 7 11 446.282 18.3650 26

7 11 1 463.660 19.0334 26

7 11 -1 432.213 17.0734 26

-11 -1 7 480.376 24.3195 25

-11 7 1 416.511 17.4627 24

-7 11 -1 396.682 20.9165 24

-1 11 -7 406.917 19.3645 24

1 11 -7 412.214 18.0611 24

1 11 7 439.187 21.1965 26

-1 7 -11 430.100 20.7938 27

1 -7 11 413.613 18.9625 25

1 7 11 419.046 19.1604 25

7 -1 -11 441.782 23.7925 12

1 11 7 424.133 19.1086 13

-7 11 -1 445.652 20.9795 13

-7 11 1 404.264 21.0030 13

11 -1 -7 458.480 24.6163 12

-11 7 -1 462.172 18.6816 13

-1 11 7 437.392 20.3020 13

1 -7 -11 450.632 19.5597 12

1 7 -11 385.426 19.1805 12

-1 7 -11 447.029 20.3812 22

-1 11 -7 429.680 20.5245 22

1 7 -11 426.108 19.5496 23

-7 11 -1 456.515 22.3400 22

1 11 -7 437.879 19.1228 22

-11 1 -7 400.256 19.2245 22

-1 7 -11 460.402 19.4990 23

-11 7 -1 441.469 18.4000 22

-7 11 -1 444.442 21.6881 23

-7 11 1 442.976 20.9928 23

-11 7 1 424.307 17.0639 22

-7 11 1 428.006 21.1787 24

1 7 -11 408.331 18.1242 22

-7 11 1 439.557 21.5894 22

-1 11 -7 435.463 22.6268 20

1 11 -7 427.302 21.9006 20

7 11 1 405.797 23.6337 19

-11 7 -1 458.166 22.8597 21

1 11 7 423.928 23.5855 19

-11 1 7 449.488 18.2776 21

-11 7 1 455.970 23.2085 21

-7 11 -1 430.073 21.7224 21

11 7 1 424.112 22.7933 18

11 7 -1 446.386 23.8822 18

-7 -1 -11 418.292 16.6739 15

7 11 -1 392.896 22.1969 18

-7 1 -11 450.596 18.9495 15

-1 11 -7 436.093 18.8892 15

1 11 -7 458.833 18.1932 15

7 11 1 417.730 23.2884 18

-11 3 -7 1.25720 5.12808 10

-7 -3 -11 31.2374 8.72349 8

-11 7 -3 2.22303 4.30123 10

-11 3 -7-1.05157 4.06928 8

-7 3 -11 3.54009 5.69517 8

-11 -3 -7 3.38273 4.71296 10

-3 -7 -11 0.90782 4.14012 8

-11 -3 -7 2.43016 4.43307 6

-11 3 -7 1.23901 3.91478 6

-7 3 -11 4.56749 3.99589 7

-11 -7 -3 2.60927 3.72095 6

-11 7 -3-0.90106 3.58244 6

-3 -7 -11 1.17126 4.27321 7

-11 7 3 0.66657 2.91585 30

-3 11 7 3.40657 4.63180 30

3 7 11 0.65302 2.97819 30

7 11 -3 2.17022 4.08074 28

3 11 7 3.33970 3.73077 30

-7 11 3 12.5348 5.38950 30

7 11 3 4.23346 4.09556 28

-3 7 11 1.00694 4.40462 29

3 11 -7-0.82417 3.44488 28

3 11 7-0.76454 3.34436 28

-7 11 -3 3.27191 3.73041 30

-3 11 7 3.51128 5.00717 29

3 11 -7 1.07679 3.80384 27

-7 3 11 1.17099 5.00956 25

3 7 -11 1.09981 4.13603 27

3 11 7 2.17098 4.20052 26

7 11 -3 2.82444 3.15523 27

-3 7 11 2.59997 3.95239 25

-11 -3 7 2.34592 3.85744 25

-7 -3 11-3.45867 4.81876 25

7 11 3 0.91854 3.55454 26

-3 11 7 7.44184 4.15659 26

-3 -7 11 1.68430 3.68382 25

-11 3 7 4.76781 5.09926 25

11 7 -3-0.95390 3.89101 12

7 -3 -11 6.10392 5.89185 12

7 3 -11 8.78615 5.36967 12

-11 7 -3 0.91133 3.52662 14

11 -7 -3 0.91318 3.90673 12

-7 11 -3 0.84648 3.18341 13

-3 11 7 1.01908 4.05160 13

11 3 -7 1.30524 5.05083 12

3 -7 -11 8.55486 4.74627 12

3 7 -11 2.75957 3.93527 12

11 -3 -7 1.27953 5.21917 12

-3 11 -7 6.57193 4.79119 23

-3 7 -11 4.43968 3.57130 23

-3 7 -11 2.14741 4.26876 22

-3 11 -7-2.04175 4.36741 24

-7 11 3 1.74603 3.81882 23

-7 3 -11 1.20862 4.67698 22

3 11 -7 9.40891 5.36358 23

-11 7 -3 2.01589 4.00735 23

-7 11 -3 1.08909 3.84729 23

-11 3 -7 1.90005 4.06432 22

11 7 3-1.00270 3.98650 19

7 11 3 1.31719 4.49521 19

-7 11 -3-0.93126 3.98404 21

-11 7 -3 3.44427 4.57948 22

-3 11 -7 1.08798 4.09154 22

-11 3 7 0.81263 3.70603 21

-3 11 -7-1.22150 4.59363 20

3 11 7 3.96444 5.52338 19

-7 11 -3 1.14046 4.28889 22

-11 7 -3 5.40748 4.62674 21

-11 7 3 4.66789 4.38859 21

11 7 -3 2.69841 5.07386 18

3 11 -7 3.50367 2.76767 15

-11 3 -7 2.62045 4.06241 15

7 11 -3 3.73675 4.95207 18

-3 11 -7 0.87690 3.39339 15

11 7 -3-0.88728 3.79592 16

3 11 -7 0.82857 3.02303 18

11 7 3 10.8092 6.29276 18

-7 3 -11 1.80321 3.48899 15

7 11 -3 2.42991 4.14635 16

-7 5 -11 14.4795 6.01468 8

-7 -5 -11 14.4889 6.24695 8

-11 5 -7 15.0410 6.26613 10

-11 5 -7 15.0006 4.96687 8

-5 -7 -11 10.8017 5.49051 8

-11 -5 -7 16.3078 5.58278 10

-11 7 -5 11.4268 5.51998 10

-5 -7 -11 10.5796 6.15489 7

-11 -7 -5 13.8464 4.84239 6

-11 7 -5 8.66231 4.65126 6

-11 -5 -7 14.7901 5.19378 6

-11 5 -7 11.6331 5.20338 6

5 11 7 15.0307 4.88255 28

7 11 -5 12.7089 5.63748 28

5 11 -7 8.12490 4.36349 28

-5 11 7 11.2512 5.59095 29

-11 7 5 14.2083 4.82706 30

7 11 5 17.1703 6.04545 28

-5 7 11 18.3407 5.71076 29

-7 11 -5 14.6667 4.62296 30

-7 5 11 14.5247 4.35005 29

5 11 7 14.5700 4.39069 30

-7 11 5 15.0056 6.05247 30

-7 11 5 22.4290 6.72778 29

-11 5 7 13.8442 5.86348 25

7 11 -5 23.5506 5.42266 27

-5 -7 11 14.4891 4.89216 25

-5 7 11 17.7923 5.73440 25

-7 -5 11 13.2756 5.43900 25

-7 5 11 7.91075 4.94900 25

-5 11 7 8.03872 4.46841 26

-11 -5 7 19.8869 6.45672 25

5 11 -7 16.3022 6.27374 27

7 5 -11 12.1118 6.15521 12

-11 5 -7 8.33325 4.50285 14

-11 7 -5 11.7109 4.83116 14

7 -5 -11 16.2871 6.37086 12

-7 11 5 16.7905 5.79309 13

-5 11 7 16.1085 5.75294 13

11 5 -7 20.9194 7.10238 12

11 -5 -7 16.7451 6.07860 12

11 7 -5 13.2092 5.32911 12

11 -7 -5 5.79829 4.41349 12

5 -7 -11 7.51342 4.61908 12

5 7 -11 14.9493 5.60844 12

-5 11 -7 16.9341 5.73793 23

-5 11 -7 14.0990 6.16051 24

-11 5 -7 14.7871 5.62231 22

-5 7 -11 1.23539 4.65188 22

-5 7 -11 13.0388 4.38898 23

-11 7 -5 14.8203 5.48663 23

-11 7 -5 16.2870 5.65244 22

-7 11 -5 10.8930 5.74102 24

-7 5 -11 23.1312 7.03647 22

-7 11 -5 16.5199 5.17941 21

-7 5 -11 13.9565 4.42281 20

11 7 5 16.0827 5.66313 19

-11 7 5 15.1063 6.18452 21

-11 5 7 12.5672 5.07061 21

5 11 7 8.12890 5.39151 19

-5 11 -7 17.1614 6.02550 22

-5 7 -11 15.6286 5.86283 20

-11 7 -5 17.5570 6.03616 21

7 11 5 18.7152 6.68239 19

7 11 -5 9.04185 5.89540 16

11 7 -5 10.1694 6.49569 18

11 7 -5 14.5227 5.04133 16

-11 5 -7 10.3828 5.60748 15

5 11 -7 16.2858 5.77902 18

-5 11 -7 5.06904 4.44095 15

7 11 -5 14.0913 5.96239 18

-7 5 -11 15.8248 5.77825 15

-5 7 -11 19.1316 6.07713 15

-7 11 -5 18.7477 5.86078 15

-7 7 -11 186.733 13.8778 8

-11 7 -7 216.799 16.3334 10

-7 -7 -11 200.551 16.0617 8

-11 -7 -7 224.175 14.9626 6

-11 7 -7 187.376 14.3274 6

-7 7 11 188.190 13.7917 29

-7 11 7 183.198 15.5889 29

7 11 7 196.353 13.6024 28

-7 11 7 203.555 16.2217 30

7 11 -7 212.842 14.8481 28

-7 7 11 189.286 14.3662 25

-11 -7 7 187.775 13.9053 25

-11 7 7 188.236 14.5084 25

-7 -7 11 234.771 15.5329 25

7 11 -7 207.471 15.1072 27

-7 11 -7 178.821 15.6570 24

7 -7 -11 202.486 14.9198 12

7 7 -11 176.591 14.4370 12

11 7 -7 191.327 14.9305 12

11 -7 -7 225.092 15.4452 12

-7 11 7 211.541 16.1729 13

-7 11 -7 209.136 16.8615 22

-7 11 -7 215.992 16.0985 23

-7 7 -11 189.419 12.0292 23

-7 7 -11 206.791 17.2942 22

-11 7 -7 193.507 13.8761 23

-11 7 -7 248.413 17.0467 22

-11 7 7 200.300 14.8672 21

-7 7 -11 237.386 15.2462 20

7 11 7 175.544 15.5144 19

-7 7 11 189.213 12.7292 21

-7 11 -7 233.084 17.2928 20

-7 11 -7 205.507 15.3126 15

-11 7 -7 191.662 12.2317 14

-7 7 -11 213.856 15.9295 15

7 11 -7 182.992 15.8932 18

-9 11 1 589.546 27.3094 9

-11 9 1 552.239 25.4260 9

-1 -9 -11 572.724 25.4772 7

-9 11 -1 593.929 27.4705 9

-9 11 -1 566.487 22.1797 10

-11 9 1 529.804 25.5435 10

-11 -1 -9 598.230 28.9822 10

-11 1 -9 612.702 29.4281 8

-9 11 1 548.873 22.7333 10

-11 9 -1 569.994 25.6519 10

-11 9 -1 633.195 26.8993 9

-9 -1 -11 600.230 28.1044 7

-11 -1 -9 608.077 30.2789 8

-9 1 -11 563.653 28.2264 8

-11 1 -9 625.708 29.6932 10

-9 1 -11 597.625 26.7197 7

-11 -1 -9 563.966 28.8289 6

-9 -1 -11 553.229 28.6906 6

-1 11 9 595.284 27.7200 29

-1 11 9 589.609 26.9631 30

-9 11 1 589.796 24.4835 30

9 11 1 599.248 27.5970 28

1 11 9 590.415 25.5397 30

-9 11 -1 569.440 22.6894 30

1 9 11 626.277 25.2207 30

-11 -1 9 581.067 28.8153 25

1 11 -9 588.580 21.5924 24

-9 -1 11 550.829 28.1033 25

1 11 9 627.720 26.4464 26

1 9 -11 639.257 28.4303 27

1 9 11 596.951 25.3810 26

9 11 1 549.523 21.4608 26

-1 11 9 547.434 24.3878 26

-1 9 11 584.230 23.1565 26

-11 9 -1 549.173 24.0911 24

-1 11 -9 608.195 24.3266 24

-11 9 1 561.021 22.7562 24

-9 11 -1 640.296 27.3090 24

9 -1 -11 601.949 29.8845 12

1 11 9 617.322 23.1744 13

11 -1 -9 580.184 29.6429 12

-1 11 9 581.859 24.1968 13

-9 11 -1 600.107 25.2349 13

-9 11 1 642.785 27.1777 13

-11 9 -1 595.277 23.5840 13

-11 9 1 627.183 25.6969 13

-1 9 11 608.537 22.4397 13

1 9 -11 640.284 26.8263 23

1 9 -11 589.867 22.7479 22

-1 9 -11 599.792 25.1956 22

-1 11 -9 578.194 26.7960 23

1 11 -9 603.752 23.3266 22

-9 1 -11 607.671 28.0634 22

-11 9 -1 582.469 24.2507 22

-11 1 -9 559.793 25.4268 22

-1 9 -11 562.612 24.8053 23

-9 11 -1 598.347 26.6206 22

-9 11 -1 556.490 26.1342 23

-9 11 1 636.952 27.1200 23

-11 9 -1 566.342 26.3485 23

-11 9 1 577.083 22.9455 22

-9 11 1 570.027 25.3245 22

-1 11 -9 563.658 25.0550 22

1 11 -9 583.434 27.5787 23

11 9 1 636.545 29.4833 19

-9 11 1 566.809 27.7740 21

-11 9 -1 623.147 28.5890 21

-1 11 -9 613.091 29.0413 20

-9 11 -1 588.870 27.3704 21

9 11 1 586.283 29.8642 19

9 11 1 534.052 28.6727 18

11 9 -1 535.236 28.6734 18

-11 1 -9 574.994 22.3788 15

11 9 1 606.089 29.9160 18

-1 11 -9 587.786 24.5258 15

-9 1 -11 560.901 22.3822 15

1 11 -9 598.219 23.7589 15

-1 9 -11 603.918 26.5589 15

1 9 -11 597.861 25.7044 15

-9 -3 -11 31.4696 7.99755 8

-11 -3 -9 61.3664 10.5852 8

-11 9 -3 41.0774 7.65408 10

-9 11 -3 35.0454 7.93711 9

-11 3 -9 42.5609 8.32653 8

-11 9 3 28.4040 7.41616 10

-9 11 3 34.6152 6.91168 10

-9 3 -11 38.5971 8.07233 8

-11 3 -9 44.3085 9.13123 10

-11 9 3 32.9551 7.43183 9

-11 9 -3 41.6060 6.31092 6

-11 -3 -9 36.3715 8.17718 6

-11 3 -9 46.5047 8.20767 6

-11 3 -9 28.6809 6.15402 7

-3 -11 -9 39.1418 7.60247 7

-9 3 -11 37.5798 8.50718 6

-9 3 -11 35.3875 7.23793 7

-9 -3 -11 40.5313 9.24539 6

-3 -9 -11 29.5249 7.64578 7

3 9 11 39.8672 6.51896 30

9 11 -3 29.9746 7.36609 28

9 11 3 50.4607 8.45407 28

-3 9 11 54.6342 8.82574 29

-9 11 -3 40.7035 6.13699 30

-3 11 9 29.5237 8.38755 29

-3 11 9 55.2124 9.32178 30

3 11 9 27.6383 6.18863 30

-9 11 3 25.9483 6.52425 30

-11 9 3 40.3043 6.88996 30

9 11 3 43.3463 7.01905 26

-11 3 9 59.5947 9.37994 25

-11 -3 9 26.1405 7.75444 25

-3 9 11 35.8127 6.11253 25

3 11 9 49.6745 8.24242 26

-9 3 11 31.6207 7.99893 25

-9 -3 11 27.2583 7.42337 25

-3 9 11 32.2721 5.62833 26

-3 11 9 48.3005 7.21949 26

3 11 -9 48.7251 8.85175 27

3 9 11 30.5275 5.67635 25

9 3 -11 47.1181 8.76135 12

-11 3 -9 40.5822 7.20164 14

-9 11 3 44.5699 8.24875 13

11 -3 -9 35.0828 9.16477 12

11 3 -9 53.2838 9.76381 12

-9 11 -3 54.6105 7.57648 13

3 9 -11 32.4118 6.23009 12

-3 11 9 37.4974 7.26576 13

9 -3 -11 37.2670 8.74736 12

-3 9 11 25.6616 6.38987 13

-11 9 3 40.9263 7.78794 13

11 9 -3 40.4109 6.70360 12

3 11 -9 42.7845 8.63454 23

-3 11 -9 34.7209 7.85690 23

-3 9 -11 30.2373 6.30961 23

-3 11 -9 43.6733 7.74018 24

-11 9 -3 44.6152 7.96792 24

-9 11 -3 36.0730 8.01195 24

-3 9 -11 42.9009 8.42037 22

-9 3 -11 25.1962 7.18660 22

-11 9 -3 42.6784 8.63717 23

3 9 -11 33.7102 7.52645 23

-11 3 -9 44.1245 8.23062 22

-9 11 -3 39.3345 8.09006 23

-3 9 -11 40.0049 8.18181 20

-11 9 -3 34.2321 7.53923 22

11 9 3 27.3701 7.38392 19

9 11 3 39.7125 9.07969 19

-9 11 -3 37.3400 7.79692 22

-3 11 -9 57.7503 9.20854 22

-9 11 3 40.3007 8.86045 21

-9 11 -3 34.7659 7.57596 21

-11 9 3 54.4284 9.55712 21

-11 9 -3 42.3054 8.32905 21

11 9 -3 37.5264 7.56271 16

3 11 -9 38.5500 6.47945 15

9 11 -3 26.3265 7.80695 18

3 9 -11 35.5587 7.01009 15

-9 3 -11 33.3899 6.77281 15

9 11 3 55.7579 9.93382 18

11 9 -3 34.6559 9.24310 18

9 11 -3 38.5272 8.30930 16

11 9 3 43.1260 8.91751 18

-3 11 -9 36.4632 7.39041 15

-11 3 -9 32.7007 6.95502 15

3 11 -9 28.8860 6.18656 18

-3 9 -11 32.5366 7.14090 15

-9 5 -11 42.8314 8.28546 8

-11 -5 -9 51.3626 10.3661 8

-9 -5 -11 49.5474 10.1877 8

-11 5 -9 58.9511 8.57977 8

-11 9 -5 50.5346 8.39928 10

-5 -9 -11 42.4081 7.55388 8

-11 5 -9 43.9401 9.20414 10

-11 9 -5 35.6325 6.46291 6

-11 -5 -9 46.0340 8.37760 6

-11 5 -9 49.5096 9.22541 6

-5 -9 -11 38.6313 8.27970 7

-11 9 5 53.1105 8.48606 30

9 11 -5 40.0431 7.78055 28

-5 11 9 52.1741 9.64130 30

-9 11 5 47.4226 8.21119 30

5 11 -9 37.2749 6.18585 28

9 11 5 52.6114 8.28296 28

-5 9 11 50.2722 8.43478 29

-5 11 9 69.6167 10.6113 29

-11 -5 9 50.1729 8.61090 25

5 9 -11 46.6089 8.63438 27

-5 9 11 43.6250 6.73485 25

9 11 -5 43.7057 7.27552 27

5 11 -9 23.8185 7.54077 27

-11 5 9 50.4475 8.87220 25

-9 -5 11 48.5967 8.69187 25

-9 5 11 36.0455 8.52168 25

-5 11 9 41.0612 6.88343 26

9 5 -11 49.3069 9.21168 12

-11 5 -9 44.7025 6.63201 14

11 -5 -9 62.2923 10.6832 12

11 5 -9 50.9746 9.74445 12

11 9 -5 40.1531 6.68137 12

9 -5 -11 47.3367 9.07442 12

-5 11 9 46.1202 8.73307 13

5 9 -11 41.0719 7.10422 12

-5 9 11 54.7312 8.40755 13

-5 9 -11 43.4142 7.24315 23

-5 11 -9 45.5775 9.09377 24

-11 5 -9 37.0929 8.01473 22

-9 11 -5 41.4246 8.55212 24

-5 11 -9 45.9925 8.02726 23

-11 9 -5 60.1969 8.94767 23

-9 11 -5 46.2873 8.05180 23

-5 9 -11 52.6894 9.41783 22

5 11 9 48.8078 10.1737 19

-9 11 5 36.8575 8.57364 21

-11 5 9 40.7329 7.15955 21

-11 9 5 49.8942 9.31113 21

-11 9 -5 53.6995 9.07040 22

-5 9 -11 47.7035 8.68180 20

11 9 5 59.0308 9.11707 19

-5 11 -9 79.4733 10.6350 20

-9 11 -5 31.0694 7.69430 22

-9 11 -5 41.8576 7.58349 21

-5 11 -9 49.1480 9.18222 22

9 11 5 41.2331 8.90070 19

-11 9 -5 49.0153 8.45500 21

11 9 -5 37.8232 7.83506 16

9 11 -5 25.0624 7.65154 16

11 9 -5 54.8765 10.4419 18

-11 5 -9 47.3432 8.44022 15

-9 5 -11 61.2739 9.23647 15

5 11 -9 43.6942 6.56240 15

-5 11 -9 40.2555 8.02965 15

9 11 -5 47.3950 9.68065 18

5 11 -9 44.6595 8.12268 18

-9 7 -11 415.452 20.5196 8

-9 -11 -7 455.836 22.0581 8

-11 -7 -9 458.621 25.9891 8

-11 9 -7 418.297 21.1421 10

-7 -9 -11 421.666 25.0510 7

-11 7 -9 434.419 22.9586 10

-9 -7 -11 448.493 25.1999 8

-7 -9 -11 391.197 21.4267 8

-11 9 -7 399.876 18.8417 6

-11 -7 -9 421.112 21.3755 6

-11 7 -9 443.949 22.2987 6

11 7 -9 385.065 17.8594 28

11 9 -7 462.734 21.7814 28

11 9 7 432.978 20.5633 28

9 11 7 442.159 20.9411 28

9 11 -7 455.527 21.9055 28

-7 11 9 386.180 22.9570 29

7 9 -11 453.351 24.4340 27

-9 11 7 402.820 22.8405 30

-11 9 7 446.066 22.3391 30

-7 9 11 420.194 22.0544 29

7 11 -9 421.534 19.0024 28

-9 7 11 410.846 19.4475 29

-11 7 9 393.481 21.5923 25

-9 -7 11 391.711 21.1064 25

9 11 -7 402.620 21.3677 27

7 11 -9 455.040 23.7933 27

-11 -7 9 410.108 21.4640 25

-9 7 11 381.300 21.0865 25

-7 9 11 361.804 18.2691 25

9 -7 -11 438.700 22.3338 12

9 7 -11 441.485 23.1658 12

11 -7 -9 430.274 22.4198 12

11 7 -9 413.595 22.6377 12

11 9 -7 386.174 18.9436 12

-7 11 9 480.982 25.3457 13

-9 11 7 450.647 24.9189 13

7 9 -11 459.872 20.4328 12

-7 9 -11 432.951 20.1670 23

-11 9 -7 372.438 22.2575 22

-7 11 -9 440.272 24.9688 22

-11 9 -7 431.545 21.9279 23

-7 11 -9 434.005 22.5894 23

-9 11 -7 464.457 23.8337 23

-9 7 -11 409.488 17.6854 23

-9 11 -7 408.788 24.0532 22

-7 9 -11 378.419 23.6268 22

-11 7 -9 414.171 23.3844 22

-9 7 -11 467.242 20.7728 20

-9 11 7 440.452 24.2068 21

-11 9 7 451.252 23.7138 21

11 9 7 440.174 21.9207 19

-7 9 11 439.076 21.0003 21

9 11 7 432.693 24.0015 19

-11 7 9 410.683 20.7129 21

-7 11 -9 519.466 25.9297 20

-11 9 -7 405.849 19.8200 21

7 11 9 443.365 24.6528 19

-7 9 -11 474.551 23.4690 20

7 11 -9 454.986 24.8638 18

-11 7 -9 423.373 23.0694 15

-7 11 -9 428.249 23.2184 15

-9 7 -11 444.803 23.6119 15

-9 11 -7 451.082 23.8140 15

-7 9 -11 375.662 22.4894 15

9 11 -7 427.957 25.4590 18

-11 -9 -9 390.920 22.9090 8

-9 -11 -9 335.109 18.7578 8

-9 -9 -11 383.104 21.5698 8

-11 9 9 404.654 21.8987 30

11 9 -9 352.295 17.0921 28

-9 11 9 374.487 22.0299 30

9 11 -9 354.348 17.2468 28

11 9 -9 358.701 20.3813 27

9 9 -11 377.140 22.0289 27

9 11 -9 363.717 21.0165 27

-9 9 11 336.028 17.3349 25

-9 11 -9 382.826 23.0265 24

9 9 -11 334.132 17.6647 12

11 9 -9 345.418 17.8844 12

-9 11 9 400.584 23.3828 13

-11 9 -9 376.249 22.4519 22

-9 11 -9 352.911 20.0306 23

-9 9 -11 374.564 18.0870 23

-11 9 -9 365.045 18.9327 23

-9 11 9 348.308 20.8579 21

-9 9 -11 370.684 19.9352 20

-9 9 11 371.289 19.0534 21

-11 9 9 351.866 19.9839 21

9 11 9 371.042 21.2370 19

9 11 -9 410.902 24.4280 18

-9 9 -11 368.778 22.1728 15

11 9 -9 356.859 23.9962 18

-11 11 -1 5.13260 5.61286 9

-11 11 1 7.70006 5.73444 9

-11 1 -11 1.48642 5.75201 8

-11 11 -1 1.85549 3.78449 10

-11 11 1 1.00901 4.50872 10

-11 -1 -11 1.52726 5.91005 6

-1 -11 -11 3.80531 4.07006 7

-11 1 -11 2.29174 5.01241 7

1 11 11 2.10419 3.95677 30

-1 11 11 4.82726 5.16296 30

11 11 1 6.65978 6.19466 28

-1 11 11 1.35215 5.08507 29

-11 11 1 3.01435 3.43697 30

-11 -1 11 7.29723 7.16843 25

1 11 11 6.45742 4.70785 26

11 11 1 1.24544 2.89647 26

-1 11 11 4.88014 4.45129 26

-11 11 1 1.11664 4.19948 13

11 -1 -11 4.72251 6.09157 12

-1 11 11 5.73126 4.54261 13

-11 11 -1 1.92295 4.29634 13

-1 11 -11-2.35780 4.80885 23

-11 -1 -11 2.46102 4.89227 22

-11 11 -1 7.65676 5.08723 24

-11 1 -11 11.5924 5.75546 22

-11 11 -1 1.26113 5.01400 23

-1 11 -11 3.34903 4.04109 24

1 11 -11 1.24877 4.26191 23

11 11 1 6.09093 6.05399 19

-1 11 -11 5.08219 4.44630 22

1 11 -11 3.14941 3.51839 22

-11 11 -1-1.07319 4.03610 22

-1 11 -11 5.78758 6.04767 20

-11 11 1 2.92780 4.53899 22

-11 11 -1 3.99316 5.29198 21

11 11 -1 4.68576 4.93512 19

11 11 -1 1.29396 4.72097 16

-11 1 -11 1.54616 3.23156 15

11 11 -1 1.61008 6.23053 18

-1 11 -11 4.36685 4.77554 15

11 11 1-3.23914 5.52723 18

1 11 -11 4.02707 4.40400 15

-11 11 3 204.542 16.3738 9

-11 11 -3 184.925 13.1649 10

-11 11 3 207.667 15.6245 10

-11 3 -11 166.353 12.9651 7

-3 -11 -11 193.408 14.9361 7

-11 -3 -11 212.259 18.3004 8

-11 3 -11 195.215 16.3078 8

-11 -3 -11 198.861 17.1775 6

-11 3 -11 231.245 18.3785 6

11 11 -3 191.209 15.6209 28

11 11 3 197.128 15.7342 28

-11 11 3 193.136 13.3419 30

-3 11 11 210.863 16.7866 30

3 11 11 195.528 13.2657 30

-3 11 11 162.460 15.0190 29

-11 -3 11 202.839 16.9666 25

-3 11 -11 208.164 14.7689 24

11 11 3 208.863 13.3173 26

3 11 11 222.249 16.3242 26

-11 3 11 161.802 15.5146 25

-3 11 11 171.348 12.5262 26

3 11 -11 188.128 16.1732 27

-11 11 -3 175.766 14.7816 24

-11 3 -11 173.676 12.0638 14

-11 11 -3 176.554 12.3283 13

-3 11 11 141.929 12.5750 13

-11 11 3 174.517 15.0497 13

11 -3 -11 212.047 17.6531 12

11 3 -11 190.472 17.5359 12

-3 11 -11 170.970 14.5364 22

-11 11 -3 173.905 14.6431 22

3 11 -11 183.193 16.1584 23

-3 11 -11 187.419 14.6419 23

-11 3 -11 187.966 16.0626 22

11 11 3 212.019 17.3239 19

-3 11 -11 195.464 16.6573 20

-11 11 3 204.437 17.2937 21

-11 11 -3 179.810 15.0989 21

11 11 -3 184.214 15.5151 16

11 11 3 210.068 18.5327 18

-3 11 -11 198.456 15.4726 15

-11 3 -11 183.666 13.5719 15

3 11 -11 171.411 12.9602 15

-5 -11 -11 301.506 19.4001 7

-11 -5 -11 331.302 22.5555 8

-11 11 5 310.994 19.5976 10

-11 5 -11 302.583 18.8454 8

-11 11 5 295.118 19.8008 9

-11 -5 -11 327.503 20.7728 6

-11 5 -11 288.317 20.1435 6

11 11 -5 315.681 19.6632 28

11 11 5 320.872 19.1478 28

-5 11 11 360.711 22.4523 30

-5 11 11 292.654 19.7206 29

-11 11 5 317.338 18.4256 30

11 11 -5 304.639 16.0408 27

-11 -5 11 289.762 19.4424 25

-11 5 11 267.672 19.0525 25

-11 11 -5 278.409 19.0721 24

-5 11 -11 295.881 19.0352 24

5 11 -11 270.044 19.1305 27

11 5 -11 321.177 21.2380 12

11 -5 -11 311.293 20.6544 12

-5 11 11 310.541 18.6968 13

-11 11 5 297.351 20.0135 13

-5 11 -11 295.082 20.1709 22

-5 11 -11 292.588 18.0084 23

5 11 -11 304.505 20.8230 23

-11 5 -11 338.501 21.3702 22

-11 11 -5 345.088 20.4939 23

-11 11 -5 312.101 20.0206 22

-5 11 -11 324.973 21.0993 20

-11 11 5 318.621 21.2738 21

-11 11 -5 303.023 18.0790 21

11 11 5 303.872 19.9091 19

5 11 -11 242.025 16.6079 18

-5 11 -11 329.279 20.2037 15

11 11 -5 324.697 20.0021 16

5 11 -11 295.922 15.9592 15

-11 5 -11 313.205 19.0283 15

-11 -11 -7 1.14066 4.41391 8

-11 -7 -11 4.40011 5.67555 8

-7 -11 -11-1.29830 4.88235 7

11 11 -7 2.02082 4.32256 28

11 11 7 1.89066 3.55502 28

-7 11 11 2.45081 4.99834 29

-11 11 7 1.11229 4.75840 30

11 11 -7 0.95662 3.49008 27

-11 -7 11-1.05224 4.18334 25

7 11 -11-1.29821 4.88204 27

-11 7 11 4.38650 4.89999 25

11 -7 -11 5.40381 5.57616 12

11 7 -11-1.14883 4.80170 12

-7 11 11 1.20534 4.39746 13

-7 11 -11-0.97849 4.37212 23

-7 11 -11 1.29644 5.01670 24

-11 11 -7 3.99719 5.15585 24

-11 7 -11 1.35882 4.95737 22

-11 11 -7-1.14388 5.21651 23

-11 11 -7-0.76575 3.20060 21

-11 11 -7-1.30056 5.17055 22

-7 11 11 2.13208 4.45569 21

-7 11 -11 1.26764 4.47790 20

-7 11 -11-1.40349 5.86610 22

-11 11 7 3.91760 5.19166 21

11 11 7 5.76821 5.15474 19

-11 7 -11 2.41609 5.28418 15

7 11 -11 1.37705 3.26316 15

-7 11 -11 3.81512 4.92100 15

7 11 -11 2.46755 4.05733 18

11 11 -7-1.56142 6.20762 18

-11 -11 -9 30.5473 6.58581 8

-11 -9 -11 38.9085 8.23945 8

-9 -11 -11 41.5463 8.38806 7

-11 11 9 28.8851 7.18224 30

-9 11 11 27.9006 7.24072 30

-11 9 11 20.7306 6.90611 30

11 11 -9 25.7977 5.19027 28

11 9 -11 26.5478 7.15749 27

9 11 -11 40.0067 8.11778 27

11 11 -9 29.4015 7.05986 27

-11 11 9 24.6993 7.32581 13

-9 11 11 33.9930 7.60749 13

-9 11 -11 30.5233 6.53508 23

-11 9 -11 32.5219 8.14938 22

-11 11 -9 24.8263 6.35977 23

-9 11 -11 30.8898 7.62403 24

-9 11 -11 22.7453 7.43954 22

-11 11 -9 21.7100 7.00633 22

-11 11 9 20.8950 6.36328 21

-9 11 11 33.4339 6.87834 21

-11 9 11 27.2443 5.82224 21

11 9 -11 31.1961 8.58364 18

11 11 -9 24.6418 7.37776 18

9 11 -11 20.6554 6.67926 18

-11 -11 -11 82.0504 9.00806 8

-11 -11 -11 61.7634 10.1266 7

-11 11 11 59.8130 8.61922 30

11 11 -11 70.0989 8.89345 27

-11 11 11 91.3848 10.7035 13

-11 11 -11 75.2787 10.2719 24

-11 11 -11 73.2671 10.3620 22

-11 11 11 60.4766 8.03166 21

11 11 -11 83.1256 10.6158 18

0 12 0 1003.90 29.3137 9

0 0 -12 1085.52 37.5918 8

-12 0 0 1027.77 36.1426 10

-12 0 0 1071.63 38.0843 6

0 12 0 1035.15 35.1771 28

0 0 -12 1101.13 28.3899 27

0 12 0 1059.09 31.5695 29

0 12 0 1039.50 35.2345 30

0 12 0 1093.18 35.0254 26

0 0 12 1080.98 36.0473 25

0 12 0 1009.34 35.2948 13

-12 0 0 1101.78 36.2104 14

0 0 -12 1098.26 37.3115 12

0 12 0 1072.99 35.1533 22

0 12 0 1129.65 33.4476 23

0 12 0 1025.73 34.2997 19

0 12 0 1166.42 32.6969 20

0 12 0 1086.50 33.1920 16

-2 0 -12-1.11572 4.31735 8

0 12 2-4.73052 3.05085 9

0 12 -2 0.58370 2.60809 9

-12 0 2-1.04903 3.82713 10

-12 2 0-2.24397 4.57645 10

-12 -2 0-1.90423 3.97948 10

-12 0 -2 1.06928 4.25102 10

0 -2 -12 2.06953 4.62353 8

-2 12 0 1.45958 3.82367 9

-2 0 -12 1.08582 3.96136 7

0 -2 -12-2.23738 4.32885 7

-12 -2 0 2.25824 4.11933 6

-12 2 0 6.82947 4.75743 6

-12 0 -2 2.29867 4.56930 6

-2 12 0 0.82199 3.09112 29

2 12 0 0.95650 4.09188 30

2 12 0-2.01052 3.43059 28

0 12 -2-0.98874 4.32487 30

0 12 2 0.80977 3.21934 29

0 12 2 3.91107 4.27687 30

2 12 0 0.56249 2.51329 29

0 12 -2 0.84738 3.45635 26

0 2 -12 1.20301 2.26199 27

0 -2 12 3.92781 4.47803 25

2 12 0-0.85194 3.72649 26

0 2 12 2.97842 4.14955 25

-2 0 12 3.09846 4.51767 25

-12 2 0-2.01411 4.20911 14

0 -2 -12 5.29292 4.82750 12

-12 0 2-0.93655 3.52194 14

0 12 2 1.92674 3.40302 13

0 2 -12 2.14324 4.58437 12

2 0 -12 2.21617 4.84689 12

0 12 2-0.62576 3.02005 23

-2 12 0-0.81557 3.48898 23

2 12 0 2.23497 3.72167 23

0 12 -2-0.89352 3.64456 23

-12 0 2 1.82118 4.15258 21

2 12 0-1.05848 3.98047 19

-12 2 0-1.02343 4.17447 21

0 12 2-2.03460 4.14946 19

0 12 -2-0.88829 4.28705 22

0 12 -2 0.82712 3.37371 19

0 12 -2-1.63042 3.15451 20

2 12 0-0.56329 2.86047 20

-2 12 0-1.99080 4.53937 22

-2 12 0-0.77787 3.01003 19

0 12 -2 4.18151 3.81381 16

-2 12 0-1.81186 2.64176 16

12 2 0 0.78610 3.28559 18

2 12 0 0.84552 4.56233 18

-2 -2 -12 235.595 16.4464 7

-2 12 -2 245.199 13.5782 9

-12 -2 2 186.712 13.9560 10

-12 -2 -2 232.617 15.2506 10

-12 2 -2 225.434 16.1544 10

-12 2 2 203.517 15.2229 10

-2 -2 -12 243.023 16.1847 8

-12 -2 -2 183.796 14.6274 6

-12 2 -2 224.692 16.1912 6

-2 12 2 217.809 14.4185 29

-2 12 -2 209.321 14.4984 30

2 12 -2 251.740 15.7469 30

-2 12 2 229.064 15.0183 30

2 12 2 240.821 13.2944 29

2 12 2 234.316 15.1131 28

2 12 -2 248.372 15.6892 28

2 12 2 243.424 15.2207 30

-2 -2 12 228.136 15.4129 25

-2 2 12 225.522 15.3430 25

-2 2 -12 224.396 11.0116 27

2 12 2 209.144 13.8769 26

-2 12 2 219.801 14.8813 26

2 12 -2 233.163 13.6191 26

2 -2 -12 226.072 15.6329 12

2 2 -12 261.861 16.8003 12

-2 12 -2 216.362 14.6729 13

-2 12 2 212.330 14.9467 13

2 12 -2 249.260 14.1069 22

-2 12 -2 246.747 15.4515 24

2 12 2 213.240 11.6041 23

2 12 -2 220.703 14.2644 23

-2 12 2 213.516 12.4499 23

-2 12 -2 243.761 15.3802 22

-2 12 -2 229.295 14.6603 23

2 12 -2 244.719 15.4418 19

2 12 -2 234.460 13.2107 20

2 12 2 213.429 15.8083 19

-12 2 -2 215.341 15.2844 21

-2 12 -2 217.165 12.2806 19

-12 2 2 233.193 15.1657 21

-2 12 2 243.180 14.8805 19

-2 12 -2 240.768 15.0239 20

2 12 -2 208.164 13.0996 18

2 12 -2 266.509 16.2102 16

-2 12 2 220.565 11.7146 16

-12 2 2 223.318 14.9568 14

-2 12 -2 200.014 12.0345 16

12 2 2 239.166 13.8882 18

-12 -2 2 235.995 14.5011 14

-4 12 0 3584.47 83.6196 9

-12 4 0 3741.23 78.1258 9

0 -4 -12 3700.19 84.7986 8

-12 -4 0 3762.43 83.1257 10

0 -4 -12 3677.76 88.7613 7

-12 0 -4 3567.31 87.8017 10

-4 0 -12 3691.58 87.9083 7

-4 0 -12 3618.07 88.9440 8

-12 -4 0 3589.17 86.8975 6

-12 4 0 3530.31 86.9891 6

-12 0 -4 3568.05 89.1074 6

-4 12 0 3531.71 85.1754 30

0 12 4 3621.01 85.8038 30

4 12 0 3672.24 86.8723 28

0 12 4 3513.58 83.8915 29

4 12 0 3569.00 84.3159 30

0 4 -12 3670.96 81.1624 27

-4 0 12 3736.56 88.1567 25

-12 0 4 3527.94 87.4675 25

0 12 4 3497.12 84.9049 26

4 12 0 3661.94 81.9675 26

0 -4 12 3740.91 85.6250 25

0 4 12 3490.28 84.4564 25

4 0 -12 3604.63 88.9724 12

-4 12 0 3605.62 85.9421 13

0 12 4 3622.19 84.7393 13

0 -4 -12 3647.44 86.0195 12

0 4 -12 3679.21 86.7407 12

0 12 -4 3693.06 83.3895 24

-4 12 0 3579.86 83.3717 23

0 4 -12 3622.32 75.7090 23

0 12 -4 3621.71 85.9910 23

0 4 -12 3562.71 81.4210 22

0 12 -4 3647.09 83.4503 22

4 12 0 3655.35 80.8832 23

-4 12 0 3696.19 87.3043 22

4 12 0 3728.28 89.6397 19

0 12 -4 3776.52 85.8216 20

-12 4 0 3771.72 87.8957 21

0 12 4 3585.18 87.8748 19

-12 0 4 3527.96 81.9288 21

0 12 -4 3709.95 80.8495 19

-12 0 4 3488.91 83.0591 14

12 4 0 3484.15 84.2849 18

4 12 0 3616.47 85.9596 18

0 12 -4 3522.30 74.5372 15

0 12 -4 3538.59 83.7145 16

-4 0 -12 3556.50 79.8240 15

-12 -4 2 12.5617 4.39334 10

-2 -4 -12 21.8495 6.15397 8

-4 2 -12 9.52145 6.23980 8

-4 12 -2 9.23436 4.76956 9

-12 4 2 13.8598 4.02827 9

-12 2 -4 9.60633 5.14173 10

-12 -4 -2 13.5504 4.94851 10

-12 -2 -4 14.0921 5.32886 10

-4 -2 -12 21.1946 6.35739 8

-2 -4 -12 13.0853 6.51359 7

-4 2 -12 21.9040 6.66300 7

-12 -4 -2 15.3399 5.83143 6

-12 4 -2 13.5023 5.33717 6

-12 -2 -4 9.49713 5.08339 6

-12 2 -4 13.3513 5.86203 6

-4 12 -2 10.9825 5.46819 30

2 12 4 10.2618 4.34824 29

4 12 2 14.6159 4.19937 29

-4 12 2 11.6747 5.56519 29

4 12 -2 19.3413 5.57512 30

2 12 4 19.2275 5.75407 28

-2 12 -4 9.42098 4.87322 30

2 12 -4 13.0147 5.33157 30

4 12 2 9.05483 4.52885 30

2 12 -4 13.0856 4.86302 28

-2 12 4 13.6961 5.17937 29

4 12 -2 4.31473 4.51392 28

4 12 2 10.5561 4.81903 28

2 12 4 12.3988 5.07713 30

-4 12 2 10.6187 5.03735 30

-2 12 4 14.1138 5.15006 30

-2 -4 12 9.20310 5.36224 25

-2 4 12 9.32322 5.34932 25

2 4 -12 19.3985 5.33916 27

-4 -2 12 23.3366 6.41408 25

-4 2 12 16.8919 6.25154 25

-2 4 -12 6.77950 3.39401 27

-12 -2 4 9.04363 4.94971 25

4 12 2 8.06413 4.00970 26

-12 2 4 11.3883 5.59792 25

-2 12 4 11.2718 4.86141 26

4 12 -2 18.0855 4.67080 26

-4 12 2 11.1722 5.07865 26

4 -2 -12 17.6395 6.34924 12

4 2 -12 11.8886 5.84345 12

2 12 4 16.4979 5.08975 13

-12 2 -4 10.5686 5.19562 14

-12 2 4 17.0330 5.71122 14

-12 4 2 7.54733 4.72134 14

-12 -2 4 15.1406 4.91735 14

-12 4 -2 8.21251 4.87017 14

-4 12 -2 12.7201 5.50577 13

-2 12 4 16.4503 5.93492 13

-12 -4 2 11.2225 4.24586 14

2 -4 -12 9.45860 5.42686 12

2 4 -12 19.6527 6.06132 12

-2 12 -4 14.6038 5.46990 23

-2 4 -12 11.5737 5.13409 22

-4 12 -2 14.0211 5.00804 23

-2 12 -4 13.6264 5.54828 24

-4 12 2 15.0703 4.91152 23

-4 12 -2 12.6596 5.18636 24

-12 2 -4 12.3709 3.91780 22

2 4 -12 16.1969 3.90154 22

4 12 -2 14.7004 5.10209 23

2 12 -4 19.7591 6.15101 23

-4 12 -2 19.5576 6.03203 22

4 12 -2 9.28891 5.40448 19

2 12 -4 4.74507 4.15701 19

-12 4 -2 14.8392 3.78174 22

-2 12 -4 9.67285 5.28348 20

-4 12 -2 12.8154 5.42774 20

-2 12 -4 12.0724 5.03064 22

-12 4 2 12.8604 5.08386 21

-12 2 4 12.9156 5.25933 21

2 12 -4 10.5015 4.92527 20

-2 12 4 14.0493 5.49253 19

2 12 -4 13.0669 4.60245 22

12 4 -2 7.60877 4.96188 18

-4 2 -12 17.0650 5.28279 15

2 12 -4 8.61006 4.60953 16

-4 -2 -12 11.7434 3.51875 15

12 4 2 12.2019 5.06946 18

-2 12 -4 16.8530 4.04015 15

4 12 -2 12.4812 5.48054 16

-2 4 -12 6.77877 4.33265 15

2 12 -4 8.74398 3.46042 18

4 12 -2 15.7046 5.37595 18

-4 4 -12 854.054 33.7957 8

-4 -4 -12 867.681 34.7955 7

-4 -4 -12 820.786 32.9048 8

-12 -4 4 901.149 30.2305 10

-12 -4 -4 886.168 31.9521 10

-12 4 -4 907.665 35.3937 10

-12 -4 -4 876.731 33.5216 6

-12 4 -4 875.893 33.9292 6

4 12 -4 781.195 31.9312 30

-4 4 12 905.907 28.6821 29

4 12 4 898.058 29.2975 29

-4 12 -4 824.413 31.4213 30

4 12 4 861.433 30.0968 30

4 12 -4 845.785 32.4144 28

4 12 4 842.570 31.6817 28

-4 4 12 876.278 33.1201 25

-4 12 -4 882.259 33.1075 24

4 12 4 873.930 31.7087 26

-4 12 4 835.438 31.6791 26

-4 -4 12 926.651 33.6611 25

4 -4 -12 884.745 33.7034 12

4 4 -12 890.229 34.0003 12

-4 12 4 836.042 32.6621 13

4 12 -4 848.165 32.4280 23

-4 4 -12 806.219 32.2671 22

-4 12 -4 894.902 33.4256 23

-4 12 4 856.476 27.4476 23

-12 4 -4 847.966 27.8881 22

-4 12 -4 813.547 32.7444 22

4 12 -4 893.900 29.2898 20

-12 4 4 932.269 33.1610 21

-4 12 -4 913.496 34.3667 20

-4 12 -4 878.970 28.1051 21

4 12 4 823.889 35.0422 19

-12 4 -4 863.161 32.9359 21

4 12 -4 832.076 30.5761 18

-4 12 -4 810.968 28.0063 15

12 4 4 957.056 32.8148 18

-12 4 -4 915.003 32.6168 14

-4 4 -12 848.897 31.2246 15

-12 -4 4 887.023 29.0002 14

-6 12 0-1.08892 3.84652 9

0 -6 -12 4.31833 3.93861 8

-12 6 0-0.82288 3.09449 9

-12 6 0-2.49000 4.24874 10

-12 0 -6-2.51204 5.12316 10

-12 0 -6 2.64798 4.51830 6

-6 0 -12-3.51674 4.40829 7

0 -6 -12-1.14482 4.04398 7

-12 -6 0-2.06220 4.41103 6

-12 6 0 3.16600 4.19559 6

6 12 0 4.62029 4.21402 28

0 12 -6-1.16429 4.11277 30

6 12 0 0.92040 4.02596 30

0 12 6 2.17950 3.97570 29

-6 12 0-3.06696 4.27290 30

0 12 6-6.42891 4.58378 30

-12 0 6 1.26167 5.01590 25

0 6 -12 0.95986 3.81604 27

-6 0 12 3.70778 5.04120 25

0 12 6-1.05615 3.60428 26

6 12 0-0.77236 3.45104 26

0 -6 12 3.81033 4.16671 25

0 6 12 0.95736 4.36589 25

6 0 -12 1.32087 5.25126 12

-12 6 0 1.10048 3.88737 14

12 0 -6-1.40980 5.30164 12

0 6 -12 4.07378 4.15413 12

0 12 6 0.96355 3.93023 13

-6 12 0 5.38857 4.91473 13

0 6 -12 0.83601 3.04998 22

-12 0 -6 0.71743 3.20561 22

0 12 -6-0.87025 3.72290 24

0 12 -6 2.31123 4.71363 23

-6 12 0 1.11227 4.53682 24

-12 6 0 0.62824 2.97736 24

-6 12 0 1.00672 3.31060 23

6 12 0-0.78125 3.02310 23

0 6 -12-0.70372 3.14438 23

0 12 -6 0.91111 3.80808 22

-12 0 6-0.76481 3.41734 21

-6 12 0 2.26646 4.95688 22

0 12 -6-1.12671 4.35990 20

-12 6 0-1.18324 4.94547 21

0 12 -6-0.67399 3.01151 19

0 12 -6-0.62560 2.90944 15

12 6 0-2.40346 4.38422 18

-6 0 -12 3.61579 3.02252 15

6 12 0-1.24727 4.69040 18

-12 6 2 193.860 12.8186 9

-6 12 -2 182.683 14.2222 9

-12 6 -2 177.007 14.8186 10

-12 2 -6 202.766 16.0596 10

-12 -6 -2 180.814 11.8447 10

-12 6 2 214.222 16.3781 10

-12 -2 -6 164.753 14.1649 10

-2 -6 -12 176.332 15.0451 7

-6 -2 -12 168.678 15.0750 8

-6 2 -12 190.671 15.5915 8

-12 6 -2 167.337 12.1090 9

-6 -2 -12 198.391 15.7815 7

-6 12 2 197.298 14.6350 9

-6 2 -12 171.944 13.8829 7

-2 -6 -12 169.987 13.0645 8

-12 -6 2 184.630 14.0770 6

-12 6 2 169.741 13.9328 6

-12 -6 -2 196.640 14.1156 6

-12 6 -2 178.740 14.0238 6

-12 -2 -6 185.029 15.5035 6

-12 2 -6 160.090 14.9387 6

-2 12 -6 196.338 14.8565 30

6 12 -2 153.283 12.9255 30

2 12 6 226.918 15.0369 29

2 6 -12 176.090 13.8840 27

-6 12 2 180.954 14.1654 30

-2 12 6 174.854 14.4609 29

-6 12 -2 184.736 13.7726 30

6 12 2 186.822 14.6120 28

-2 12 6 176.239 14.5171 30

6 12 2 206.565 13.2939 30

2 12 6 202.480 14.0496 30

2 12 -6 179.437 13.3612 28

-12 -2 6 168.228 14.7830 25

-2 -6 12 152.726 12.7612 25

6 12 2 190.264 13.1272 26

-6 2 12 198.922 15.6682 25

-6 -2 12 179.097 14.8901 25

-2 12 -6 199.463 14.1004 24

-2 12 6 196.909 14.2272 26

6 12 -2 176.822 11.0718 26

-12 2 6 213.503 16.0386 25

-2 6 12 173.518 13.4718 25

2 12 6 179.835 14.1510 26

2 -6 12 185.005 13.5110 25

2 6 12 182.865 13.4105 25

6 -2 -12 182.852 15.5819 12

6 2 -12 180.611 15.5528 12

-12 -6 2 160.982 11.7690 14

-6 12 -2 199.646 14.1558 13

-2 12 6 168.068 13.3017 13

-6 12 2 207.536 15.4531 13

12 2 -6 209.469 17.0969 12

12 -2 -6 170.326 15.8062 12

2 12 6 159.390 12.3973 13

2 -6 -12 186.448 13.8420 12

2 6 -12 172.536 14.0195 12

-6 12 2 181.872 14.5423 22

-2 12 -6 186.901 14.6010 23

2 12 -6 195.597 15.3300 23

-2 6 -12 181.404 11.3135 23

-12 6 -2 168.108 11.3065 22

2 12 -6 178.098 12.1330 22

2 6 -12 201.265 12.8649 23

-2 12 -6 185.798 14.5660 22

-12 -2 -6 172.331 11.0553 22

-6 12 -2 220.882 15.1513 23

-2 6 -12 202.737 14.4107 22

-6 12 2 192.931 13.4779 23

-12 2 -6 188.027 12.3809 22

2 12 -6 189.033 14.0940 20

6 12 2 196.775 16.6533 19

-6 12 -2 195.659 13.9829 21

-2 12 -6 193.729 15.6194 20

-12 6 2 207.793 15.7804 21

-12 2 6 176.870 12.5921 21

-12 6 -2 167.957 14.5992 21

2 12 6 173.518 15.5861 19

6 12 -2 189.604 15.9309 19

2 12 -6 189.007 13.2620 19

-12 6 -2 186.824 14.1725 14

12 6 -2 170.378 11.7450 16

6 12 -2 192.442 15.5200 16

6 12 -2 173.788 14.9197 18

6 12 2 190.501 15.7315 18

12 6 2 175.535 14.3722 18

-2 12 -6 173.340 11.7262 15

2 12 -6 181.267 10.2072 15

-6 2 -12 200.315 13.4194 15

2 12 -6 157.998 11.1536 18

12 6 -2 185.451 15.8052 18

-2 6 -12 178.317 13.8475 15

-12 -4 6 12.2759 4.66614 10

-6 4 -12 7.42841 5.29894 8

-12 6 -4 13.9086 6.10453 10

-12 4 -6 11.5635 5.56099 8

-6 -4 -12 15.9325 6.29446 8

-12 4 -6 11.9523 6.63631 10

-4 -6 -12 8.91724 5.18644 8

-12 -4 -6 8.84009 5.33551 10

-12 -6 -4 13.2687 4.66543 10

-12 -4 -6 12.3425 5.74239 6

-12 4 -6 17.8118 6.14240 6

-4 -6 -12 9.37080 6.10704 7

-6 -4 -12 16.7400 6.85368 7

-12 -6 -4 13.9130 5.43727 6

-12 6 -4 12.1392 5.60649 6

-6 12 4 12.7972 6.17836 29

4 12 -6 5.06665 4.43544 28

-12 6 4 7.85957 3.73415 30

4 12 6 3.78664 4.40561 28

-4 12 6 7.42853 5.53443 30

6 12 4 8.54561 3.95421 29

-4 6 12 10.1619 4.76911 29

-4 12 -6 16.6712 5.78293 30

-6 12 -4 5.72252 4.52301 30

6 12 -4 12.5526 5.30957 28

6 12 4 10.0360 3.92376 30

6 12 4 7.69161 4.59547 28

4 12 6 11.0867 4.47130 30

-6 12 4 4.75574 5.31491 30

-6 -4 12 11.8181 6.28723 25

-4 6 12 3.14685 4.28166 25

6 12 -4 12.7602 4.84810 27

4 6 -12 4.58989 5.54035 27

-12 4 6 12.2104 5.34349 25

-12 -4 6 14.2116 6.57240 25

6 12 4 2.05136 3.86057 26

-6 4 12 10.8294 5.91224 25

-4 -6 12 7.20932 5.06114 25

4 12 -6 13.7520 5.79126 27

-4 12 6 5.15581 4.41430 26

12 4 -6 15.8282 7.51468 12

6 -4 -12 12.3445 6.16899 12

12 -4 -6 11.8033 6.44359 12

6 4 -12 14.0361 6.37651 12

-12 4 -6 8.02790 5.18000 14

-12 6 -4 10.8833 4.86228 14

12 6 -4 7.98675 5.30874 12

-4 12 6 10.4519 4.97078 13

-6 12 4 16.8698 6.59618 13

12 -6 -4 6.74367 5.80122 12

4 -6 -12 9.44561 4.88364 12

4 6 -12 17.8118 6.17828 12

-6 12 -4 7.25189 5.62336 24

-4 6 -12 5.93560 3.01862 23

-6 12 -4 17.5893 6.05226 23

-6 4 -12 3.85034 5.36679 22

-12 6 -4 7.73000 4.43439 22

-12 4 -6 7.20873 4.27360 22

4 12 -6 11.0576 5.82504 23

-4 12 -6 10.3611 5.84843 24

-4 6 -12 8.39328 5.24729 22

-6 12 4 7.27420 4.60654 23

-12 6 4 2.36466 4.94438 21

-4 12 -6 8.41666 5.26189 22

4 12 -6 4.91679 4.48741 20

12 6 4 13.0585 4.70030 19

4 12 6 11.2557 6.41832 19

-6 12 -4 7.43986 5.30710 22

-6 12 -4 5.03005 3.90225 21

-4 6 -12 7.12137 5.16880 20

-6 4 -12 16.7127 4.64207 20

-6 12 -4 11.5439 6.40970 20

-4 12 -6 16.7058 6.52782 20

-12 4 6 8.97277 5.22613 21

-12 6 -4 12.5618 5.70720 21

6 12 4 2.82640 4.99469 19

12 6 -4 21.1493 7.27638 18

12 6 -4 7.66781 3.63762 16

6 12 -4 13.2212 6.60679 16

-4 6 -12 11.2552 5.13536 15

4 12 -6 10.5230 5.30984 18

-4 12 -6 7.15503 4.54474 15

6 12 -4 2.39671 5.01132 18

12 6 4 12.8607 6.03440 18

-6 4 -12 5.13680 4.68795 15

-12 -6 -6 80.9645 9.35005 10

-6 6 -12 90.6494 10.9966 8

-6 -6 -12 102.951 12.0792 8

-12 6 -6 107.002 12.2453 10

-12 -6 -6 93.7378 10.9730 6

-6 -6 -12 81.2972 11.7876 7

-12 6 -6 104.038 11.3495 6

-6 12 -6 99.6099 10.4699 30

6 12 -6 91.4894 10.6066 28

-6 6 12 90.7563 9.40203 29

-6 12 6 117.712 13.3327 29

6 12 6 121.527 11.0102 28

-6 12 6 92.9663 11.6522 30

-6 12 -6 104.997 12.0199 24

6 12 -6 86.7021 10.3452 27

-6 6 12 97.6888 11.1018 25

6 12 6 95.3710 11.0189 26

-6 -6 12 61.4959 9.48201 25

6 -6 -12 96.0997 11.3548 12

6 6 -12 105.553 12.0439 12

-12 6 -6 64.0372 8.37635 14

-6 12 6 101.657 11.7600 13

12 6 -6 86.8885 11.2878 12

12 -6 -6 88.0987 11.0975 12

-6 6 -12 87.3468 11.6114 22

-12 6 -6 92.1714 10.1903 22

-12 6 -6 92.2216 10.9161 21

-6 6 -12 92.2184 9.95637 20

-6 12 -6 88.0971 11.8011 22

-12 6 6 112.477 11.6063 21

6 12 6 99.6364 12.8042 19

6 12 -6 110.625 13.1254 16

6 12 -6 82.9622 10.4145 18

-6 6 -12 78.2441 10.2342 15

-6 12 -6 72.2416 9.39941 15

-8 12 0 647.959 29.6702 9

-8 0 -12 686.377 30.1161 7

-12 8 0 706.763 28.2103 9

-12 8 0 701.889 30.5264 10

-12 0 -8 683.239 31.9972 8

-12 0 -8 755.760 32.9934 10

0 -8 -12 712.489 29.2134 7

-12 -8 0 733.252 26.8848 6

-12 8 0 661.023 26.0339 6

-12 0 -8 697.374 32.3995 6

-8 12 0 688.525 27.3487 30

0 12 8 673.486 29.7021 29

0 12 8 641.385 28.2985 30

8 12 0 673.979 29.9418 28

0 -8 12 681.841 25.5803 25

0 8 12 714.163 26.1650 25

0 8 -12 655.532 28.7636 27

-8 0 12 723.405 32.2025 25

-12 8 0 684.193 25.0010 24

0 8 12 696.859 26.0002 26

0 12 8 705.545 29.0085 26

8 12 0 689.162 24.1786 26

0 12 -8 681.730 25.8121 24

-12 0 8 709.637 32.1776 25

8 0 -12 689.819 32.4630 12

-8 12 0 739.073 29.8819 13

12 0 -8 679.021 33.0280 12

-12 8 0 681.423 25.9744 13

0 12 8 697.648 27.0741 13

-8 12 0 673.260 28.9838 24

0 12 -8 695.599 27.1787 22

0 8 -12 679.036 26.3339 23

-12 0 -8 650.586 26.3130 22

-12 8 0 684.032 24.2959 22

-8 12 0 692.366 29.0902 23

-8 12 0 642.548 28.7629 22

0 8 -12 611.497 25.1163 22

-8 12 0 662.934 29.9876 21

0 12 -8 738.129 31.4283 20

8 12 0 699.353 32.9150 19

-8 0 -12 666.592 24.1509 15

12 8 0 668.555 31.6173 18

8 12 0 684.357 32.2509 18

0 12 -8 655.470 24.6462 15

0 8 -12 716.469 29.7265 15

-12 8 -2 32.5086 6.86007 9

-8 -2 -12 37.0613 9.09247 8

-12 8 2 18.5831 6.13550 9

-12 2 -8 49.8685 8.98070 8

-8 12 2 45.5186 8.80575 9

-8 12 -2 29.0191 7.12228 9

-2 -8 -12 38.8626 6.94111 8

-12 8 2 48.5110 9.36134 10

-12 8 -2 30.3555 7.53805 10

-8 2 -12 50.6460 9.11114 8

-12 -2 -8 29.3554 7.81863 10

-12 -2 -8 30.9146 7.71621 6

-12 2 -8 57.3849 9.72478 6

-8 -2 -12 34.7736 8.14816 7

-2 -8 -12 42.6738 8.77934 7

-8 2 -12 40.4919 8.25552 7

-12 -8 2 35.9912 6.60470 6

-12 8 2 35.2707 6.90692 6

-12 -8 -2 40.1213 7.00955 6

-12 8 -2 30.7475 6.42068 6

-2 12 8 34.6244 7.67592 30

2 8 12 26.4132 6.10286 30

8 12 2 41.9285 8.05756 28

-2 8 12 39.1840 8.20112 29

2 12 8 34.7942 7.60825 29

-8 12 -2 34.2052 6.79992 30

2 12 8 37.1342 7.23577 30

-8 12 2 31.3632 7.40892 30

-8 -2 12 49.3662 9.44757 25

-2 8 12 29.4814 6.30946 25

-2 -8 12 41.9800 7.21177 25

-12 2 8 41.2731 9.15722 25

-2 8 12 46.0697 6.08780 26

2 12 8 32.1484 7.05364 26

-8 2 12 48.6795 9.33302 25

-12 -2 8 35.4510 8.08461 25

8 12 2 41.3166 6.59922 26

-2 12 8 38.3667 7.17128 26

2 8 -12 38.0379 7.77972 27

2 -8 12 37.8565 6.82566 25

2 8 12 39.8283 6.85569 25

8 2 -12 43.6570 9.21763 12

12 -8 -2 34.0059 6.76066 12

-12 -8 2 39.2429 6.40277 14

-8 12 2 35.1067 7.83329 13

2 12 8 30.7242 6.13921 13

2 -8 -12 41.6013 6.95524 12

-8 12 -2 33.1924 7.13453 13

2 8 -12 33.7894 6.58933 12

-2 12 8 31.8446 7.20817 13

-12 8 -2 30.2133 5.41115 13

12 2 -8 27.0023 8.45828 12

12 -2 -8 32.6849 8.37727 12

-2 8 12 25.9390 5.65089 13

8 -2 -12 39.7910 9.09535 12

12 8 -2 25.6927 6.58345 12

-2 12 -8 27.3398 7.54536 23

-2 8 -12 42.1856 6.73872 23

-8 12 2 37.5670 7.39983 23

-12 -2 -8 36.4659 6.93287 22

-2 12 -8 42.1442 7.86969 24

-8 12 -2 37.8557 8.05675 24

-8 12 -2 37.2737 8.15788 23

-12 8 -2 37.8398 7.34886 24

-2 8 -12 37.4650 7.52613 22

2 8 -12 43.1557 7.46374 23

-12 2 -8 34.3080 7.09784 22

-2 12 -8 28.3560 7.91147 20

8 12 2 43.5452 9.89630 19

-2 12 -8 22.4486 7.12117 22

2 12 -8 49.4038 8.89283 20

12 8 2 39.4757 8.40466 19

-12 8 2 37.2011 8.33195 21

-8 12 2 31.5538 7.36775 22

2 12 -8 36.4382 6.13738 22

-12 8 -2 40.3797 6.90547 22

-8 12 -2 38.4100 8.25173 22

-8 12 -2 29.2823 7.21863 21

-12 8 -2 37.8166 8.62718 21

2 12 -8 29.3474 6.10347 19

12 8 2 51.2623 8.95796 18

12 8 -2 41.5073 9.19215 18

12 8 -2 32.8138 6.99527 16

8 12 -2 44.1161 9.20006 18

2 8 -12 38.8153 7.46015 15

-2 12 -8 29.0850 6.34541 15

2 12 -8 37.3696 5.92159 15

8 12 -2 36.3356 8.07395 16

-8 2 -12 34.2161 6.80207 15

-12 8 -4 2368.93 63.8352 10

-12 4 -8 2332.99 67.1894 10

-4 -8 -12 2297.78 65.6161 7

-4 -12 -8 2271.36 58.9203 7

-8 12 4 2162.35 55.7236 10

-8 4 -12 2235.87 57.6131 7

-12 4 -8 2334.10 61.7601 8

-8 -4 -12 2206.88 67.1837 8

-4 -8 -12 2265.88 59.7921 8

-8 4 -12 2284.61 64.8395 8

-12 -8 4 2187.89 58.7574 6

-12 8 4 2213.52 58.9358 6

-12 -8 -4 2178.96 57.2475 6

-12 8 -4 2165.99 57.8477 6

-12 -4 -8 2295.55 65.4700 6

-12 4 -8 2333.70 66.1834 6

-8 12 4 2375.51 63.6298 30

-4 12 8 2171.68 64.5908 29

4 12 8 2192.50 56.5252 30

8 12 -4 2242.27 63.0569 28

8 12 4 2260.21 62.4208 28

-12 8 4 2301.76 55.8184 30

-4 12 8 2311.39 65.4881 30

-4 8 12 2360.45 62.2968 29

-8 12 -4 2186.21 55.9745 30

4 12 -8 2218.77 56.9737 28

8 12 4 2236.10 59.8932 26

-8 -4 12 2279.57 64.2784 25

-8 4 12 2134.19 63.2872 25

-4 -8 12 2193.36 56.9224 25

4 12 8 2387.66 64.1675 26

-12 4 8 2148.03 63.9248 25

-4 12 8 2192.94 59.2498 26

-12 -4 8 2208.37 64.0642 25

4 12 -8 2164.13 62.7478 27

4 -8 12 2378.29 58.5827 25

4 8 12 2193.64 57.0246 25

8 12 -4 2267.81 56.3167 27

-4 8 12 2187.06 57.6791 25

-4 12 -8 2266.53 63.0440 24

8 -4 -12 2258.43 65.4499 12

8 4 -12 2217.73 65.8121 12

-8 12 -4 2228.34 57.0374 13

12 -4 -8 2253.20 66.1775 12

12 4 -8 2118.53 65.1710 12

-4 12 8 2245.17 62.8390 13

12 8 -4 2228.14 58.9821 12

12 -8 -4 2108.13 57.1260 12

-4 8 12 2276.14 58.0975 13

4 -8 -12 2342.49 58.4735 12

4 8 -12 2258.68 58.9486 12

-12 8 -4 2372.27 60.5935 22

-4 12 -8 2290.63 64.7532 22

4 12 -8 2373.54 66.4206 23

-4 12 -8 2262.15 63.7114 23

-4 8 -12 2226.49 56.1510 23

-12 4 -8 2243.95 60.8853 22

-4 8 -12 2262.95 63.9799 22

-8 12 -4 2158.51 63.1701 23

-8 12 -4 2201.31 64.1009 22

12 8 4 2242.70 61.0279 19

-4 8 -12 2367.36 64.1679 20

-4 12 -8 2273.73 66.6558 20

-8 12 -4 2209.88 58.7992 21

-12 8 4 2229.52 64.6751 21

-12 4 8 2336.82 58.5520 21

8 12 4 2216.10 67.2088 19

-12 8 -4 2287.04 62.9695 21

4 12 8 2299.67 67.7864 19

-4 12 -8 2218.16 60.0204 15

8 12 -4 2140.33 65.3461 18

12 8 -4 2188.93 68.0630 18

12 8 4 2351.88 66.5532 18

-8 4 -12 2267.92 60.9114 15

4 12 -8 2096.81 57.7507 18

-12 4 -8 2196.14 58.2712 14

12 8 -4 2228.67 59.0687 16

8 12 -4 2307.42 66.0412 16

-8 6 -12 14.7326 6.21467 8

-8 -6 -12 18.7525 7.68197 8

-6 -8 -12 19.7706 6.96706 8

-12 6 -8 18.2288 5.25108 8

-12 8 -6 16.7060 5.87464 10

-12 6 -8 28.0277 8.17565 10

-12 -8 -6 26.3424 5.81320 6

-12 8 -6 23.2556 6.44645 6

-12 -6 -8 31.8392 7.38436 6

-12 6 -8 29.3614 7.32784 6

-8 -6 -12 28.7108 9.54808 7

-6 -8 -12 26.7441 8.25266 7

-12 8 6 22.3140 6.12808 30

6 12 -8 19.9907 5.38593 28

6 12 8 25.5814 5.89195 28

8 12 6 14.8370 5.22064 28

8 12 -6 18.0035 6.42159 28

-6 8 12 15.8252 5.70675 29

-6 12 8 18.0327 6.58612 29

-8 12 6 15.3871 6.73021 30

8 12 -6 14.1111 5.37534 27

6 12 -8 15.7131 6.05145 27

-12 6 8 23.0765 6.84039 25

8 12 6 27.4749 7.40031 26

-12 -6 8 23.2028 6.78713 25

-6 8 12 24.6538 6.48428 25

-6 -8 12 19.8881 5.60642 25

-8 6 12 19.0467 6.43581 25

-8 -6 12 20.8898 6.87151 25

8 -6 -12 25.4946 6.92652 12

8 6 -12 24.1034 7.14376 12

-12 6 -8 30.5161 5.89859 14

12 6 -8 27.8581 8.17641 12

12 -6 -8 25.7081 6.89451 12

12 8 -6 20.1665 6.04388 12

12 -8 -6 27.0343 6.31827 12

-6 12 8 22.1261 7.13377 13

-8 12 6 20.4510 7.97242 13

6 -8 -12 33.2623 6.72602 12

6 8 -12 23.1078 6.16003 12

-8 6 -12 21.4478 7.50230 22

-6 12 -8 18.4992 6.85380 23

-6 12 -8 38.4457 8.29911 24

-8 12 -6 21.7671 7.55820 24

-8 12 -6 16.3614 6.30003 23

-6 8 -12 20.7942 7.16361 22

-12 6 -8 22.3855 6.72271 22

-6 8 -12 27.6565 5.42597 23

-12 8 -6 23.4948 6.76019 21

-6 8 -12 20.3465 7.15395 20

12 8 6 22.2407 6.24921 19

-8 6 -12 21.0158 5.58031 20

8 12 6 28.8258 8.21914 19

6 12 8 26.3382 7.90555 19

-12 8 -6 30.8191 7.58972 22

-12 8 6 16.3247 6.69032 21

-12 6 8 33.9548 7.15827 21

-8 12 -6 19.4115 5.11145 21

-6 12 -8 30.5369 7.71109 22

8 12 -6 26.8477 7.84958 16

8 12 -6 26.8222 7.73572 18

-6 12 -8 14.9804 6.23074 15

6 12 -8 28.8192 7.59839 18

12 8 -6 21.0861 8.37821 18

-8 6 -12 22.7707 6.92478 15

-6 8 -12 35.7078 7.72577 15

-12 8 -8 485.803 24.1025 10

-8 -8 -12 443.986 24.3611 8

-8 -8 -12 474.716 27.5061 7

-12 -8 -8 467.085 21.4473 6

-12 8 -8 470.060 22.1523 6

8 8 -12 488.731 25.8452 27

12 8 -8 474.667 21.1132 28

12 8 8 517.995 21.1344 28

-8 12 8 481.429 25.5430 30

8 12 -8 448.200 21.3514 28

8 12 8 479.062 20.6968 28

-8 8 12 481.164 21.9253 29

-12 8 8 524.705 23.6821 30

-8 12 -8 492.228 26.1089 24

-8 8 12 467.922 22.0813 25

8 12 -8 486.206 24.0471 27

8 12 8 514.900 26.0767 26

-8 -8 12 437.415 21.0675 25

8 -8 -12 491.141 22.3729 12

8 8 -12 452.382 22.5325 12

12 -8 -8 482.034 21.9137 12

12 8 -8 434.951 21.8808 12

-8 12 8 487.267 26.3858 13

-12 8 -8 470.694 24.7119 22

-8 12 -8 511.988 25.0168 23

-8 8 -12 405.436 17.8585 23

-8 12 -8 477.338 26.2043 22

-8 8 -12 518.125 27.4632 22

8 12 8 512.004 26.4393 19

-8 8 -12 436.588 21.4802 20

-8 12 8 525.302 26.3011 21

-12 8 8 471.779 23.5048 21

-8 12 -8 450.018 23.9851 15

12 8 -8 512.011 28.9141 18

8 12 -8 446.373 25.0828 18

-8 8 -12 442.827 24.4572 15

-12 10 0-1.20316 5.02876 9

-10 0 -12 3.09593 5.98997 8

-12 10 0 2.29658 5.23659 10

-12 0 -10-7.64583 6.23730 8

-10 12 0 1.33726 4.72379 9

-12 0 -10-1.54626 5.46205 6

-10 0 -12 2.57398 4.83980 7

-10 0 -12 1.54698 5.27930 6

0 10 12 1.09510 4.79010 30

10 12 0 1.35306 5.37925 28

-10 12 0 1.68629 3.60695 30

0 12 10-1.17112 4.89484 30

-12 0 10 1.48601 4.88675 25

0 10 12-1.89674 4.57703 26

0 12 10 1.10486 4.15489 26

-10 0 12-1.46108 5.49446 25

10 0 -12 3.18156 5.80360 12

12 0 -10 1.61314 6.24217 12

0 12 10-0.85022 3.71896 13

-10 12 0 3.35108 4.44086 13

-12 10 0-1.94513 4.06494 13

0 12 -10 1.55987 3.48492 24

-10 0 -12-2.73062 5.97204 22

-12 0 -10 1.13049 4.49437 22

-12 10 0 0.92145 3.85130 24

-10 12 0 9.87110 5.95500 23

0 10 -12-3.27820 4.56720 23

0 12 -10 1.30792 4.62012 23

-12 10 0-0.88564 3.87389 22

10 12 0 1.59757 6.18192 19

0 10 -12 4.43275 4.12304 22

-10 12 0 3.42503 5.30954 22

0 12 -10 2.85869 3.91098 20

0 12 -10-0.93126 3.79850 22

-10 12 0 2.71397 4.95065 21

-12 10 0-1.39767 5.40838 21

12 10 0 1.47961 5.72548 19

0 10 -12 3.42882 4.66192 15

12 10 0 1.59250 4.81728 18

0 12 -10-0.94539 3.75850 15

-12 10 2 92.9937 11.0639 9

-10 12 -2 85.9182 11.2572 9

-12 2 -10 93.4627 11.8273 8

-10 -2 -12 92.1840 13.0317 8

-12 10 2 67.2435 10.0879 10

-10 12 2 83.4210 9.08067 10

-10 12 2 88.8689 11.5545 9

-12 10 -2 71.5849 9.95852 10

-10 2 -12 76.7663 10.9983 8

-10 -2 -12 59.8483 11.0825 7

-12 -2 -10 86.8041 11.8395 6

-12 2 -10 102.256 13.2190 6

-12 2 -10 83.6729 10.0360 7

-10 2 -12 70.1271 9.75933 7

-2 -10 -12 90.3202 10.5368 7

2 10 12 84.9054 9.54976 30

-2 10 12 106.636 12.2740 30

10 12 2 85.5149 11.4837 28

-2 12 10 106.364 12.0438 30

-2 10 12 100.881 12.3376 29

-2 12 10 84.0296 11.4774 29

-10 12 2 66.4168 9.03594 30

2 12 10 74.9388 9.71992 30

2 12 10 87.8449 11.3589 29

12 10 2 77.7104 7.97894 26

-12 2 10 65.8679 11.0319 25

-12 -2 10 94.2739 12.3604 25

2 10 -12 101.520 11.9380 27

2 12 10 100.627 11.1423 26

10 12 2 81.4464 8.64504 26

2 10 12 94.4534 10.5196 26

-2 10 12 80.0175 8.72069 26

-2 12 10 79.1749 9.45319 26

-10 2 12 103.997 12.7943 25

-10 -2 12 91.2290 11.8698 25

10 -2 -12 96.8724 13.1684 12

12 -2 -10 84.4222 12.9220 12

12 2 -10 96.7364 12.9446 12

-10 12 -2 77.5135 9.19587 13

-12 10 -2 82.6428 8.59613 13

-2 12 10 77.7001 9.73365 13

-2 10 12 81.9202 8.74563 13

-10 12 2 87.5883 11.3529 13

-12 10 2 71.1680 9.78298 13

10 2 -12 102.563 12.9607 12

2 10 -12 92.0621 11.3914 23

-2 12 -10 80.5230 10.7489 23

-2 10 -12 71.7018 9.55595 23

-12 -2 -10 86.0641 10.5019 22

-2 10 -12 84.4582 9.50072 24

-12 10 -2 92.7795 10.8929 24

-10 12 -2 82.1067 10.7692 24

-2 12 -10 69.0357 9.16568 24

-10 2 -12 84.4378 11.6506 22

-12 10 -2 86.5479 10.2094 22

-2 10 -12 61.5676 9.15071 22

-12 2 -10 88.1436 11.1290 22

2 12 -10 81.5819 11.3314 23

-10 12 -2 106.256 11.9463 23

12 10 2 107.735 12.6591 19

-2 12 -10 87.5818 10.4324 22

2 12 -10 103.664 12.4441 20

-2 10 -12 85.6354 11.5959 20

10 12 2 85.6986 11.8164 19

-10 12 -2 88.8056 11.2388 21

-2 12 -10 110.569 12.8856 20

-12 10 2 80.1392 11.6263 21

-12 10 -2 93.3763 11.7278 21

10 12 -2 98.0518 13.1999 19

-10 12 -2 84.4031 11.0356 22

12 10 -2 121.667 14.3116 18

12 10 -2 105.866 11.8496 16

10 12 -2 102.507 12.5573 16

-10 2 -12 82.5507 9.14133 15

-2 12 -10 95.1471 10.4690 15

2 10 -12 73.8935 9.68907 15

12 10 2 82.1035 12.3967 18

10 12 2 94.7924 13.5008 18

-2 10 -12 88.4030 10.9830 15

2 12 -10 76.1249 9.02465 15

-12 10 4 2.59801 5.29884 10

-12 -4 -10 1.64368 5.99687 8

-10 12 4 2.73034 4.98087 9

-10 -4 -12-1.61635 6.91498 8

-10 12 4 4.74448 4.32770 10

-12 10 4 1.22627 4.74552 9

-12 4 -10 1.19871 4.50821 8

-12 10 -4 4.08539 4.26926 10

-12 4 -10 2.90946 5.62950 10

-10 4 -12-1.30068 4.74561 8

-10 -4 -12 3.16718 6.45956 7

-12 -4 -10 8.33292 5.80504 6

-12 4 -10 1.42812 5.67795 6

-4 -10 -12 7.62300 5.67716 7

-4 -12 -10 4.16932 5.20740 7

-4 12 10 2.78080 4.91184 30

10 12 -4 10.0694 5.62430 28

12 10 -4 1.23443 4.90798 28

12 10 4 4.84055 5.05826 28

-4 10 12 4.03853 6.01528 30

10 12 4 2.44173 4.01527 28

-4 10 12-1.26853 4.90905 29

-4 12 10-1.38932 4.90804 29

-10 12 4 1.09019 5.07045 30

-12 10 4 9.28759 4.49071 30

-12 4 10-1.38026 5.63026 25

10 12 4 3.81422 4.43506 26

-12 -4 10 4.06315 5.24123 25

4 12 -10 6.69075 5.59328 27

4 12 10 7.47777 4.95514 26

-4 12 10 1.82092 3.98292 26

-10 4 12 2.75025 5.32148 25

-10 -4 12 1.34888 5.63810 25

-4 10 12 3.82479 4.53204 13

10 -4 -12 2.83497 5.63569 12

-12 4 -10-1.60363 3.27106 14

12 -4 -10 7.22661 5.10583 12

12 4 -10 1.47585 4.85371 12

-4 12 10-1.12639 4.47848 13

-10 12 4 5.29248 5.53046 13

-12 10 4 5.00271 4.70361 13

10 4 -12-1.47168 6.00313 12

-4 12 -10 7.22561 4.66039 23

-4 10 -12 5.07448 4.90938 22

-4 10 -12 4.79602 4.19610 23

-4 12 -10 4.63115 4.60330 24

-12 10 -4 5.93317 5.30246 24

-10 12 -4 3.90368 4.74760 24

-12 4 -10 9.91941 5.65480 22

-12 10 -4 11.0830 6.25376 23

4 10 -12 1.25620 4.58334 23

4 12 -10 4.17516 5.95405 23

-10 4 -12 2.85710 5.97110 22

-4 12 -10 5.19149 4.88108 22

-12 10 -4 1.12118 4.79675 22

-10 12 -4 6.47450 5.41252 22

-4 10 -12 2.73387 5.28979 20

12 10 4 1.26296 4.88747 19

-10 12 4 4.34949 5.76427 21

-10 12 -4 4.24796 4.43911 21

-12 10 4 4.23108 5.89506 21

10 12 4 7.39764 4.86580 19

-12 10 -4 7.11587 5.62095 21

4 10 -12 4.96765 4.34623 15

12 10 -4 4.56736 4.77283 16

10 12 -4 5.40278 6.40155 16

-4 12 -10 10.2492 5.78335 15

-10 4 -12 2.11385 3.97506 15

4 12 -10 4.44427 4.29021 18

12 10 -4 11.3196 6.75908 18

10 12 -4 4.65147 6.16443 18

-4 10 -12 1.26711 4.76539 15

4 12 -10 5.16399 3.36475 15

-10 6 -12 112.340 11.7353 8

-10 -6 -12 97.2974 13.3094 8

-12 10 -6 121.120 11.0358 10

-12 -6 -10 127.323 14.3365 8

-12 6 -10 107.839 10.9079 8

-10 -6 -12 118.260 14.3923 7

-6 -10 -12 102.575 12.9416 7

-12 -6 -10 119.502 12.4489 6

-12 6 -10 123.168 12.9967 6

-6 -12 -10 107.619 11.7103 7

-6 10 12 112.289 13.2951 30

12 10 -6 139.065 12.3176 28

12 10 6 103.489 10.8922 28

-6 10 12 109.517 12.2105 29

10 12 6 120.595 11.8148 28

-10 12 6 108.585 11.7922 30

-12 10 6 140.598 11.7741 30

-6 12 10 142.925 14.5143 30

12 10 -6 100.806 9.83808 27

10 12 -6 118.516 12.1753 28

-6 12 10 133.720 13.6463 29

-12 10 -6 132.101 13.4136 24

6 10 -12 130.877 13.4643 27

6 12 -10 125.522 13.0868 27

10 12 -6 93.9052 10.2215 27

10 12 6 112.691 11.3129 26

6 12 10 118.156 12.8602 26

-10 6 12 135.639 13.2715 25

-10 -6 12 117.861 12.3294 25

-10 12 -6 133.612 14.0192 24

-12 -6 10 127.749 12.6057 25

-12 6 10 105.283 11.6194 25

10 -6 -12 131.818 13.3067 12

10 6 -12 112.173 12.6638 12

12 6 -10 91.9138 11.8182 12

12 -6 -10 75.0087 10.7141 12

-6 12 10 107.014 12.4555 13

-6 10 12 129.901 12.5203 13

-12 10 6 144.248 13.8769 13

-12 6 -10 110.625 12.4936 22

-6 12 -10 122.391 14.0999 22

-6 10 -12 109.910 13.1192 22

-6 10 -12 78.5363 9.29353 23

-6 12 -10 117.914 11.8482 23

-6 12 -10 93.5979 11.9258 24

-10 12 -6 135.304 13.5009 23

-10 6 -12 129.619 13.5279 22

-12 10 -6 125.789 12.5296 23

6 10 -12 106.325 12.2295 23

-12 10 -6 129.985 13.1456 22

-10 12 -6 96.6222 12.4665 22

-6 12 -10 127.993 13.8739 20

12 10 6 114.098 11.9699 19

10 12 6 104.556 12.5493 19

-12 10 6 128.629 13.4030 21

-10 12 -6 115.688 10.4050 21

-12 10 -6 122.630 11.8310 21

-6 10 -12 102.263 11.9930 20

-10 12 6 102.401 13.0793 21

-6 12 -10 101.577 11.3752 15

6 10 -12 103.658 10.4112 15

6 12 -10 103.810 11.5165 18

10 12 -6 117.449 14.0586 18

-10 6 -12 130.640 12.6813 15

-12 -10 -8 10.0340 5.72401 8

-12 -8 -10 20.9555 6.62452 8

-10 -8 -12 15.6761 7.25079 8

-8 -10 -12 10.7199 4.70847 8

-8 -12 -10 20.2833 6.62303 7

-10 -8 -12 18.4478 8.17873 7

-8 -10 -12 8.37656 5.97650 7

10 12 8 8.82731 4.14620 28

-12 10 8 15.3425 5.75493 30

-8 12 10 5.34042 5.45019 30

12 10 -8 12.8569 4.94916 28

-12 8 10 15.0930 5.65275 30

12 10 8 15.8792 4.91632 28

10 12 -8 13.2433 5.09761 28

-10 12 8 11.9579 5.87741 30

-8 10 12 14.4956 5.67039 29

8 12 -10 10.7470 5.45001 27

10 8 -12 10.0933 5.52306 27

8 10 -12 23.0567 6.71493 27

-10 8 12 16.7440 5.43702 25

-10 -8 12 13.2337 5.21949 25

10 12 8 16.6280 6.50339 26

10 12 -8 9.08293 4.96177 27

12 10 -8 9.79240 4.97762 27

10 -8 -12 8.07806 4.33740 12

10 8 -12 11.7257 5.35182 12

12 8 -10 14.5303 6.06103 12

12 -8 -10 12.4020 4.71633 12

-8 12 10 11.4242 5.90741 13

-10 12 8 10.8325 6.42098 13

-8 10 12 6.96091 5.70248 13

-12 8 -10 11.3565 6.41157 22

-8 10 -12 12.4127 6.41791 22

-8 12 -10 14.4999 6.13430 24

-8 12 -10 14.6374 5.13995 23

-8 10 -12 15.2206 4.91302 23

-10 12 -8 11.1683 5.39454 23

-12 10 -8 10.3402 5.77943 24

-8 12 -10 13.8096 6.78631 22

-12 10 -8 18.5135 6.37173 22

10 12 8 11.8598 6.02663 19

-10 12 -8 17.3696 6.67834 22

-8 12 10 12.6937 5.76898 21

-8 10 12 12.7163 4.83370 21

-10 12 8 16.4468 6.63225 21

-8 10 -12 16.0130 6.31388 20

-12 10 8 15.0436 6.06704 21

-12 8 10 3.51782 4.17375 21

-8 12 -10 14.6862 6.01512 15

8 10 -12 3.91019 5.82799 18

8 12 -10 11.1956 6.21817 18

8 10 -12 14.9756 4.88211 15

-10 8 -12 12.2185 6.20865 15

10 12 -8 15.7544 6.91569 18

-8 10 -12 11.4327 6.75930 15

-12 -10 -10 18.5307 5.97454 8

-10 -10 -12 21.1758 5.96360 8

-10 -12 -10 18.5822 6.70773 7

-10 -10 -12 30.2970 7.88541 7

-12 10 10 15.8994 5.52314 30

-10 10 12 8.10599 5.49823 30

-10 12 10 18.1949 6.05704 30

12 10 -10 14.7399 5.31285 27

10 10 -12 22.5052 6.41806 27

10 12 -10 21.1485 5.74588 27

10 12 10 14.6233 5.53507 26

-10 12 10 21.5736 6.19280 13

-10 10 12 19.1167 5.98975 13

-12 10 10 27.8970 7.51046 13

-10 12 -10 26.9487 7.16158 24

-10 12 -10 27.2751 6.12061 23

-12 10 -10 28.0887 7.70476 22

-10 12 10 12.0498 5.50528 21

-12 10 10 13.9897 5.24005 21

-10 10 -12 13.9071 6.08131 15

10 12 -10 20.9272 6.55533 18

10 10 -12 19.2106 7.48689 18

12 10 -10 22.3954 7.77267 18

-12 0 -12 1489.20 47.8881 7

-12 12 0 1488.31 48.7514 9

-12 12 0 1426.57 41.9698 10

-12 0 -12 1572.90 53.4516 8

-12 0 -12 1380.50 51.4244 6

0 12 12 1411.94 48.6910 29

12 12 0 1558.94 50.2999 28

0 12 12 1456.01 45.9530 30

0 12 12 1474.88 44.5516 26

-12 0 12 1494.76 51.3232 25

12 0 -12 1541.33 53.7956 12

-12 12 0 1453.28 44.1782 13

-12 12 0 1379.53 43.4538 22

0 12 -12 1470.53 41.7650 22

0 12 -12 1504.50 47.6426 23

-12 0 -12 1477.14 47.7099 22

0 12 -12 1570.49 51.7948 20

-12 12 0 1485.53 49.7093 21

12 12 0 1484.73 52.0662 19

12 12 0 1513.89 49.5549 16

12 12 0 1572.15 54.2304 18

0 12 -12 1498.06 45.0575 15

-12 12 2 55.6263 9.09218 9

-12 12 2 29.8004 6.67385 10

-12 2 -12 45.3762 9.61923 8

-12 -2 -12 64.4687 10.7049 6

-12 2 -12 36.7249 9.69684 6

-12 2 -12 38.8933 7.67604 7

-12 -2 -12 33.5613 8.86647 7

-2 12 12 47.6146 9.17175 30

2 12 12 44.9214 7.58991 30

-2 12 12 47.5436 9.30007 29

12 12 2 39.4640 8.43021 28

-12 2 12 40.7164 8.92690 25

-12 -2 12 57.4062 9.73489 25

2 12 12 50.2192 8.24332 26

-2 12 12 41.0518 7.27132 26

-12 2 -12 35.5103 6.62408 14

12 2 -12 50.3246 10.5656 12

-12 12 -2 39.3929 7.00500 13

-12 12 2 34.3377 7.91531 13

12 -2 -12 47.9910 10.3052 12

-2 12 -12 28.6900 6.15214 24

-2 12 -12 57.2317 8.77530 23

-12 -2 -12 31.5496 7.57127 22

-12 12 -2 48.7873 8.49257 24

-12 2 -12 34.5427 8.28317 22

2 12 -12 46.3657 9.52195 23

12 12 -2 36.1497 9.42849 19

-12 12 -2 42.9519 8.28457 22

2 12 -12 38.3118 9.27108 20

12 12 2 26.5083 7.97984 19

-2 12 -12 39.6113 7.93110 22

-12 12 -2 42.7116 9.19510 21

12 12 -2 43.0581 8.44055 16

12 12 -2 41.5673 9.13540 18

-2 12 -12 45.2839 8.45976 15

2 12 -12 44.2157 7.54997 15

-4 -12 -12 349.483 19.6172 7

-12 12 4 310.605 18.4435 10

-12 -4 -12 406.982 24.5338 7

-12 -4 -12 432.835 26.0528 8

-12 12 4 423.608 23.1287 9

-12 4 -12 421.722 22.7494 8

12 12 -4 395.419 21.8102 28

12 12 4 404.015 21.7852 28

-4 12 12 360.916 22.1429 29

-12 12 4 359.154 18.2356 30

-4 12 12 432.414 23.7025 30

12 12 4 389.671 17.8438 26

4 12 12 366.723 20.8178 26

-12 4 12 350.839 22.0165 25

-12 -4 12 403.136 22.8237 25

-12 12 -4 355.395 20.9520 24

-4 12 -12 336.752 19.1602 24

12 4 -12 360.990 23.1981 12

-4 12 12 358.600 19.0188 13

-12 12 4 367.091 21.4769 13

12 -4 -12 370.966 23.1775 12

4 12 -12 403.942 22.7537 23

-4 12 -12 389.756 20.4646 23

-12 12 -4 340.887 20.4912 22

-4 12 -12 364.053 21.0454 22

-12 4 -12 422.775 23.1023 22

-4 12 -12 415.562 24.1687 20

12 12 4 364.778 22.2677 19

-12 12 4 428.870 24.2597 21

-12 12 -4 352.000 19.9969 21

-4 12 -12 418.611 22.0573 15

4 12 -12 370.222 17.7243 15

12 12 -4 339.827 20.5778 16

-12 12 6 28.0096 7.04449 9

-12 6 -12 38.1864 6.78351 8

-12 -6 -12 27.5537 7.73037 8

-12 12 6 30.0834 6.92510 10

-6 -12 -12 24.7423 6.81799 7

-6 12 12 31.7256 8.28232 30

12 12 -6 44.7221 7.72436 28

12 12 6 35.5042 6.92924 28

-12 12 6 31.5321 6.59459 30

-6 12 12 23.9878 7.10894 29

6 12 -12 26.3141 7.85276 27

-12 -6 12 37.2911 7.57079 25

12 12 6 30.2351 6.14602 26

6 12 12 26.6365 6.70115 26

-12 6 12 28.1923 7.36400 25

12 -6 -12 25.9860 6.93264 12

12 6 -12 29.3983 7.60216 12

-6 12 12 24.4638 6.72471 13

-12 12 6 36.4994 8.45190 13

-12 6 -12 40.0888 8.25628 22

-6 12 -12 44.6493 7.21661 23

-6 12 -12 26.6266 7.10271 24

-12 12 -6 31.2512 7.76968 24

-12 12 -6 27.1525 7.24222 23

6 12 -12 23.7610 7.14250 23

-12 12 -6 22.4658 5.54993 21

-12 12 -6 17.3342 6.51853 22

-6 12 -12 50.3611 9.27296 22

-6 12 12 22.2363 6.25731 21

12 12 6 30.3250 7.11663 19

-6 12 -12 40.2352 8.97212 20

-12 12 6 26.9953 7.24662 21

-6 12 -12 28.0568 7.40582 15

6 12 -12 25.2639 5.78456 18

12 12 -6 33.8727 8.82382 18

6 12 -12 28.5547 5.17089 15

-12 -12 -8 963.084 32.1444 8

-12 -8 -12 1045.22 37.8092 8

-12 -8 -12 1077.80 40.0954 7

-8 -12 -12 1084.92 36.2994 7

-12 12 8 894.384 32.6235 10

-12 12 8 990.546 35.7454 9

-12 12 8 1025.37 33.4086 30

12 12 -8 919.293 30.2674 28

-12 8 12 1035.59 35.0004 30

12 8 -12 989.674 35.5363 27

12 12 -8 960.930 30.9676 27

-8 12 -12 1036.97 36.1655 24

12 12 8 1074.37 34.4235 26

8 12 12 1037.30 36.0460 26

8 12 -12 975.877 35.8218 27

-12 12 -8 987.545 36.2006 24

12 8 -12 963.045 31.8608 12

-8 12 12 1003.58 34.9491 13

-12 8 -12 1116.38 38.0307 22

8 12 -12 1039.84 36.8897 23

-8 12 -12 1001.14 37.2435 22

-8 12 -12 958.292 30.7598 23

-12 12 -8 934.849 35.3306 22

-8 12 12 985.342 32.1053 21

-12 12 8 1021.82 35.8020 21

12 12 8 1017.11 32.9038 19

12 12 -8 1035.44 39.0814 18

8 12 -12 931.980 33.2950 18

-8 12 -12 1028.63 36.2647 15

12 8 -12 950.689 38.5053 18

-12 12 10 13.7415 4.87686 9

-12 12 10 8.01798 4.01135 10

-12 -10 -12 14.2265 5.06759 8

-12 -12 -10 6.09158 4.54160 7

-12 -10 -12 14.4632 6.00713 7

-10 -12 -12 5.69986 4.25024 7

-12 10 12 8.54514 4.34481 30

-12 12 10 15.9770 4.89245 30

-10 12 12 21.1385 6.07542 30

10 12 -12 13.2818 5.04809 27

12 12 -10 15.3140 4.75484 27

12 10 -12 15.7275 4.91735 27

12 12 10 9.29775 3.93696 26

-10 12 12 11.0641 4.76202 13

-12 12 10 21.0385 5.92571 13

-12 10 12 15.4669 5.22061 13

-12 10 -12 6.08333 4.62877 24

-10 12 -12 22.6516 5.96227 24

10 12 -12 17.7484 5.32486 23

-12 12 -10 9.69920 4.85020 22

-12 10 -12 13.9401 5.88960 22

10 12 -12 14.4006 4.15442 20

-10 12 -12 13.3752 5.14436 22

-12 12 10 12.2381 4.30593 21

12 10 -12 7.73908 4.94474 18

10 12 -12 9.18040 4.74155 18

12 12 -10 15.0375 5.88197 18

-12 12 12 176.188 10.8609 30

-12 12 -12 176.357 11.7448 24

12 12 12 166.631 10.5250 26

-12 12 12 159.132 11.1279 13

12 12 -12 160.544 11.1220 23

-12 12 -12 170.046 11.5375 22

12 12 -12 150.758 11.0058 18

-12 -12 -12 187.976 12.2286 7

-12 12 12 186.381 11.3800 9

1 13 1 1170.15 31.3092 9

-1 -1 -13 1209.06 41.9653 8

-1 13 -1 1215.32 34.5258 9

-1 1 -13 1121.74 41.3565 8

-13 1 1 1165.24 41.2444 10

-13 -1 1 1124.07 39.3952 10

-13 -1 -1 1136.19 39.9073 10

-13 1 -1 1230.76 42.1617 10

-1 13 1 1203.23 34.5471 9

-13 -1 -1 1167.96 41.9971 6

1 13 -1 1122.98 39.5413 30

1 1 -13 1142.87 32.6760 27

1 13 1 1161.33 34.7933 29

-1 13 1 1171.09 40.1684 30

-1 13 1 1212.33 37.3401 29

1 13 1 1127.20 39.1092 30

1 13 1 1188.87 40.2319 28

-1 -1 13 1166.70 40.3329 25

1 13 1 1175.61 38.9659 26

1 13 -1 1189.72 38.1316 26

-13 -1 -1 1209.39 40.6563 14

-1 13 1 1174.01 40.1291 13

-1 -1 -13 1165.57 41.0312 12

1 -1 -13 1129.40 40.9718 12

1 13 -1 1159.43 37.2112 23

1 13 1 1184.38 35.0017 23

-1 13 -1 1174.44 37.7677 23

-1 13 1 1181.93 35.9094 23

-1 13 -1 1199.29 39.8795 22

1 13 -1 1223.09 35.5194 20

1 13 1 1154.91 39.9392 19

-1 13 -1 1174.74 36.6184 19

-1 13 1 1220.98 38.8226 19

-13 1 1 1219.74 40.3382 21

1 13 -1 1135.83 38.5585 19

-1 13 -1 1226.93 37.5114 20

1 13 -1 1189.85 38.3839 16

-1 13 1 1237.35 35.3915 16

-13 1 1 1207.10 40.1998 14

-13 -1 1 1217.58 40.0150 14

-13 1 -1 1181.34 40.6107 14

-1 13 -1 1156.69 35.3215 16

13 1 -1 1147.89 35.2703 18

-3 13 1 154.713 12.2184 9

-3 1 -13 162.181 14.3450 8

-13 -3 -1 177.564 13.9094 10

-1 -3 -13 165.427 13.9372 8

-3 13 -1 144.460 11.5283 9

-13 3 1 167.227 14.8442 10

-13 -1 3 139.370 13.0642 10

-13 3 -1 178.918 15.1547 10

-13 -3 1 166.073 13.1722 10

-13 1 3 142.368 13.6115 10

-13 1 -3 144.845 13.6726 10

-13 -1 -3 163.301 14.2348 10

-3 1 -13 183.987 14.9150 7

-1 -3 -13 157.162 14.7704 7

-3 -1 -13 155.516 14.2944 8

1 13 3 170.560 10.0772 9

-13 -3 1 173.048 15.0951 6

-13 3 1 150.397 14.0231 6

-13 -3 -1 145.083 13.7080 6

-13 3 -1 170.381 14.7694 6

-13 -1 -3 177.437 15.2012 6

3 13 -1 144.477 12.8660 30

1 13 3 171.751 13.9597 30

3 13 1 199.772 14.7375 30

1 3 -13 154.345 11.4501 27

1 13 3 157.366 12.2139 29

-1 13 3 179.220 13.6279 29

3 13 1 164.316 10.4555 29

1 13 -3 164.656 14.0085 30

3 13 1 159.048 13.5364 28

-3 13 -1 153.217 13.1945 30

-1 13 3 169.162 13.9180 30

-1 -3 13 150.130 13.3548 25

-1 3 13 147.419 13.2684 25

-3 -1 13 174.100 14.4978 25

-1 3 -13 162.183 10.7262 27

3 13 1 148.812 12.3019 26

-1 13 3 157.155 13.4781 26

3 13 -1 169.798 12.7158 26

1 -3 13 149.837 12.9294 25

1 3 13 175.893 14.0206 25

3 -1 -13 175.976 14.6827 12

-13 -3 1 169.279 13.3603 14

1 13 3 159.608 13.1343 13

-3 13 -1 148.395 13.4633 13

-1 13 3 142.194 12.7542 13

1 -3 -13 139.232 13.0278 12

1 3 -13 179.063 14.7287 12

-1 13 -3 161.941 13.0851 23

-3 13 1 158.209 13.8819 22

3 13 -1 176.259 12.8144 23

1 13 -3 188.841 13.8169 23

3 13 1 164.186 11.3302 23

-1 3 -13 152.506 12.4479 22

1 3 -13 135.083 10.7529 22

-3 13 -1 165.764 13.1284 23

-3 13 1 174.715 12.3931 23

-1 13 3 169.332 10.6217 23

-1 13 -3 170.470 13.5287 22

-3 13 -1 187.828 14.7082 22

1 13 -3 159.473 12.5159 22

-13 3 -1 150.855 13.7688 21

3 13 -1 168.490 14.3785 19

1 13 -3 152.382 12.5076 19

3 13 1 165.111 14.5534 19

-1 13 -3 175.476 13.4598 20

-1 13 -3 160.098 11.4427 19

1 13 3 151.976 13.7156 19

-13 3 1 167.757 14.2705 21

-13 1 3 172.648 13.3926 21

1 13 -3 163.327 12.6175 20

-1 13 3 182.988 14.5280 19

-3 13 -1 163.883 11.1307 19

-3 13 1 160.575 12.3207 19

3 13 -1 169.121 14.0219 16

-3 1 -13 164.305 12.2318 15

-3 -1 -13 161.323 11.1507 15

13 3 1 143.925 12.0989 18

13 3 -1 171.933 13.2004 18

-13 1 3 171.695 13.7034 14

3 13 -1 159.389 12.9389 18

1 13 -3 166.462 10.8397 18

-13 3 1 191.674 14.8113 14

-13 -1 3 154.259 12.6371 14

-1 13 -3 176.253 12.7315 16

1 13 -3 161.415 13.4368 16

-3 3 -13 917.378 36.8135 8

-13 3 3 919.488 37.4203 10

-13 -3 3 954.048 33.2926 10

-13 -3 -3 978.008 35.1614 10

-3 -3 -13 927.835 37.3316 7

-3 -3 -13 896.166 35.6493 8

-13 -3 -3 937.557 36.5672 6

-13 3 -3 884.742 35.9032 6

3 13 3 959.730 30.7532 29

3 13 -3 907.152 35.0673 30

3 13 3 937.382 33.5196 30

3 13 -3 999.144 36.1822 28

-3 13 3 891.852 34.6170 29

3 13 3 937.932 34.7110 28

-3 13 -3 921.197 34.9428 30

-3 -3 13 860.411 34.7889 25

-3 3 13 1046.15 37.3156 25

-3 13 -3 939.452 34.9830 24

-3 13 3 942.409 35.1553 26

3 13 3 920.612 33.9406 26

3 -3 -13 945.188 36.5086 12

3 3 -13 910.800 36.1586 12

-3 13 3 894.234 35.1448 13

-3 13 -3 881.831 34.5070 22

-3 13 -3 958.232 35.3458 23

3 13 -3 925.625 33.9822 23

-3 3 -13 917.820 34.4492 22

-3 13 3 919.509 29.6078 23

3 13 -3 992.476 31.3215 20

3 13 3 930.775 37.4175 19

-13 3 3 941.219 34.7996 21

-3 13 -3 995.185 35.9642 20

3 13 -3 880.699 34.3567 19

-3 3 -13 975.710 33.8807 15

-3 -3 -13 939.877 27.7864 15

13 3 -3 907.637 34.3580 18

-13 -3 3 980.995 33.0494 14

3 13 -3 880.687 31.2044 18

-13 3 -3 911.751 34.6909 14

13 3 3 1106.90 34.8629 18

-13 3 3 889.263 34.5778 14

3 13 -3 959.873 36.0810 16

-5 13 1 214.993 15.5930 9

-1 -5 -13 216.584 16.7481 7

-13 -5 1 217.883 13.8360 10

-13 5 1 214.581 12.5463 9

-5 13 -1 210.965 15.0585 9

-1 -5 -13 213.857 15.1632 8

-13 5 -1 208.518 12.7205 9

-13 -5 -1 228.543 14.4934 10

-13 1 -5 217.130 16.9297 10

-13 -1 -5 195.710 16.1169 10

-5 1 -13 255.282 17.5871 7

-5 -1 -13 206.728 16.4069 7

-13 5 -1 241.042 17.9560 10

-5 -1 -13 185.884 16.4527 8

-13 -5 1 236.458 16.8147 6

-13 5 1 215.438 16.7041 6

-13 -5 -1 215.697 16.0043 6

-13 5 -1 217.893 16.3391 6

-13 -1 -5 251.320 18.2946 6

-5 13 -1 198.585 15.1415 30

-1 13 -5 222.072 17.0265 30

5 13 -1 244.069 16.3130 30

5 13 1 217.390 14.8425 30

-1 13 5 209.728 15.5243 29

-1 13 5 225.045 16.7003 30

5 13 1 198.574 15.7481 28

1 13 5 216.681 15.0852 29

-5 13 1 208.996 15.7551 30

1 13 5 206.563 15.3796 30

-1 -5 13 194.043 14.8723 25

-1 5 13 243.493 16.6798 25

-5 -1 13 209.734 16.7923 25

1 5 -13 205.880 14.0878 27

1 13 5 199.781 15.2121 26

5 13 1 255.329 15.4934 26

-1 13 5 203.625 15.5131 26

5 13 -1 228.349 13.9213 26

-1 5 -13 208.794 13.6108 27

-13 -1 5 176.516 15.4278 25

-13 5 -1 202.342 11.8321 24

1 -5 13 239.428 15.9654 25

1 5 13 192.597 14.6898 25

-1 13 5 224.012 15.7824 13

5 -1 -13 199.552 16.8899 12

-13 -5 1 210.245 14.5413 14

1 13 5 220.445 15.3567 13

-5 13 -1 220.307 15.7341 13

-5 13 1 203.279 15.7405 13

13 -1 -5 231.152 18.5361 12

1 -5 -13 201.971 15.4610 12

1 5 -13 213.686 16.2344 12

-1 13 -5 219.434 15.1761 24

5 13 -1 202.971 13.6902 23

1 5 -13 207.094 11.9282 23

5 13 1 217.247 12.8094 23

1 13 -5 190.983 15.6432 23

-1 13 -5 225.812 16.3189 23

-1 13 -5 214.458 15.1854 22

-1 5 -13 198.249 14.1955 22

-5 13 -1 224.495 15.5476 23

1 5 -13 206.121 12.9082 22

-5 13 1 191.606 13.9833 23

1 13 -5 216.201 14.3055 22

-13 1 -5 187.309 11.3156 22

-5 13 -1 211.969 16.5841 22

1 13 -5 209.001 14.0022 19

1 13 -5 232.806 15.7904 20

-1 13 -5 252.616 17.4151 20

-13 5 1 208.496 16.1843 21

-13 1 5 185.632 13.5344 21

1 13 5 215.425 17.2234 19

-1 13 5 226.663 17.1094 19

5 13 -1 218.654 17.2122 19

5 13 -1 218.590 16.6942 16

-1 5 -13 240.680 16.4558 15

-13 5 -1 177.705 14.6148 14

13 5 -1 203.382 15.6123 18

5 13 -1 225.447 16.3215 18

5 13 1 215.741 16.7596 18

-1 13 -5 203.021 11.3903 15

13 5 1 222.265 15.6906 18

-13 -1 5 211.875 14.4467 14

-5 -1 -13 209.387 12.7034 15

-5 1 -13 218.324 13.9157 15

-13 5 3 898.130 29.0560 9

-5 3 -13 886.993 36.1747 8

-13 -3 5 879.719 32.3678 10

-13 -5 -3 947.848 32.5495 10

-13 -5 3 934.529 30.5186 10

-13 5 -3 912.550 36.7775 10

-13 -3 -5 959.470 35.5387 10

-3 -5 -13 895.953 36.7277 7

-5 -3 -13 880.073 36.4846 8

-3 -5 -13 832.873 33.5261 8

-13 -5 -3 986.883 36.1742 6

-13 5 -3 928.406 35.8392 6

-13 -3 -5 881.324 36.0454 6

-13 3 -5 912.583 36.9585 6

-5 13 3 916.443 35.3559 30

3 13 5 889.521 31.6899 29

-3 13 -5 879.442 34.2751 30

5 13 3 893.280 28.1619 29

-5 13 -3 950.560 34.5976 30

5 13 3 895.255 31.5406 30

3 13 5 887.677 32.3946 30

-3 13 5 911.628 36.0446 29

-3 13 5 862.143 35.4104 30

-5 13 3 870.642 35.5196 29

5 13 -3 933.228 35.0901 30

5 13 -3 951.893 35.9563 28

5 13 3 898.594 34.8338 28

3 5 -13 936.201 34.0056 27

3 13 -5 936.240 34.5502 28

3 13 5 893.676 33.1887 28

-5 13 -3 918.909 35.7197 24

-3 -5 13 984.124 35.6603 25

-3 5 13 869.927 34.2103 25

-5 -3 13 934.305 36.0619 25

-5 3 13 961.739 36.7777 25

-3 13 -5 874.374 33.8798 24

5 13 3 871.472 32.4278 26

-3 13 5 880.694 34.0770 26

5 13 -3 830.846 27.6361 26

5 -3 -13 943.887 37.1476 12

5 3 -13 880.837 36.2738 12

-3 13 5 976.402 35.9756 13

-5 13 3 851.339 34.8798 13

13 3 -5 856.531 36.5073 12

13 -3 -5 923.716 38.1072 12

3 -5 -13 923.946 34.7397 12

3 5 -13 911.637 35.3414 12

3 13 -5 872.871 29.0979 22

-5 13 -3 892.340 35.5350 22

-13 5 -3 882.235 27.8890 22

5 13 -3 913.247 33.8740 23

-3 13 -5 921.795 35.3869 22

-5 3 -13 840.785 34.9115 22

-3 13 -5 841.602 34.3761 23

-5 13 -3 892.827 34.7795 23

-3 5 -13 902.280 34.5090 22

3 13 -5 844.408 34.4122 23

-5 13 3 907.060 30.4741 23

-13 3 -5 849.351 28.2847 22

3 13 -5 1007.87 33.3418 20

-5 3 -13 872.046 28.2032 20

-13 3 5 930.103 33.5684 21

5 13 3 863.512 37.4195 19

-5 13 -3 883.763 30.9429 21

-13 5 3 890.929 35.1706 21

-13 5 -3 884.594 35.0107 21

-3 13 -5 942.919 36.4949 20

5 13 -3 918.128 36.8636 19

3 13 -5 876.425 33.2249 19

-13 -3 5 897.089 30.5454 14

13 5 -3 845.733 35.3944 18

-13 5 -3 899.821 34.0598 14

3 13 -5 856.227 29.9867 18

5 13 -3 895.670 34.0332 18

-13 3 -5 920.633 34.7060 14

-3 13 -5 906.803 29.3424 15

-13 -5 3 882.034 30.4932 14

-5 3 -13 928.558 33.1011 15

3 13 -5 892.396 35.9095 16

-3 5 -13 971.419 35.2182 15

13 5 3 862.436 33.0383 18

-5 5 -13 911.104 36.9603 8

-5 -5 -13 955.197 39.5606 7

-13 5 -5 1040.22 39.9466 10

-13 -5 -5 980.520 34.8151 10

-13 5 -5 973.836 31.8915 8

-5 -5 -13 1008.69 38.5749 8

-13 -5 -5 978.561 37.2541 6

-13 5 -5 938.009 37.1921 6

5 13 5 991.320 32.7605 30

-5 5 13 968.680 31.3250 29

-5 13 -5 1005.19 35.6254 30

5 13 5 967.630 32.2251 29

5 13 -5 963.370 36.1677 28

5 13 5 1014.59 36.0132 28

-5 -5 13 1021.51 37.5234 25

-5 5 13 1008.86 37.4759 25

-5 13 -5 952.160 37.1339 24

5 13 5 976.058 35.7538 26

5 -5 -13 1031.71 37.8347 12

5 5 -13 996.593 38.0079 12

13 5 -5 963.358 37.8213 12

13 -5 -5 990.451 38.0789 12

-5 13 5 1034.27 38.5306 13

-13 5 -5 898.471 31.2298 22

5 13 -5 937.406 36.7738 23

-5 13 -5 954.458 37.5283 23

-5 13 -5 999.559 38.5431 22

-5 5 -13 976.389 38.0721 22

-5 5 -13 1005.61 33.1648 20

5 13 -5 1023.13 32.9000 20

5 13 5 917.713 39.5344 19

-5 13 -5 891.748 29.3925 21

-13 5 5 979.559 36.3440 21

5 13 -5 943.392 37.3456 19

-5 13 -5 1138.79 41.1202 20

13 5 -5 1014.38 40.4190 18

5 13 -5 952.069 34.9098 18

-5 13 -5 1027.27 33.6365 15

-13 5 -5 1001.61 35.3479 14

-5 5 -13 965.367 36.0332 15

-7 13 1 722.748 31.0173 9

-13 7 1 734.648 27.5338 9

-7 13 -1 729.108 31.1679 9

-1 -7 -13 684.364 26.9597 8

-13 7 -1 682.727 26.8634 9

-13 7 1 733.054 32.5738 10

-1 -7 -13 673.815 30.3884 7

-7 -1 -13 691.425 31.6028 7

-13 1 -7 696.549 32.7104 10

-13 -1 -7 754.500 33.0615 10

-13 7 -1 741.222 32.3597 10

-7 -1 -13 713.749 33.7449 8

-7 1 -13 628.680 31.2563 8

-7 1 -13 685.975 30.4631 7

-13 1 -7 640.960 30.6721 8

-13 -7 1 683.300 28.4283 6

-13 7 1 717.404 29.2046 6

-13 -7 -1 730.152 29.0310 6

-13 7 -1 736.016 29.2747 6

-13 -1 -7 733.208 33.3558 6

1 13 7 702.022 30.1113 29

-1 13 7 683.401 30.6162 29

-7 13 -1 712.140 28.8960 30

-7 13 1 743.788 30.4322 30

7 13 1 745.439 32.0183 28

1 13 7 714.075 29.4787 30

-1 13 7 704.609 30.6531 30

7 13 1 713.209 27.1550 30

1 -7 13 747.023 28.8505 25

1 7 13 757.787 28.9273 25

-1 -7 13 728.184 28.6218 25

-1 7 13 700.662 28.3154 25

1 7 -13 685.261 29.5500 27

-1 13 -7 731.058 28.4713 24

-7 -1 13 717.047 32.3157 25

1 13 7 683.236 29.7662 26

7 13 1 630.468 25.6006 26

-1 13 7 698.215 29.7558 26

-13 7 -1 669.655 24.7904 24

-13 -1 7 705.986 32.6066 25

7 13 -1 686.945 24.5919 26

7 -1 -13 663.779 32.1910 12

1 13 7 730.124 28.4188 13

-7 13 -1 683.840 29.5545 13

-1 13 7 706.866 29.3146 13

-7 13 1 773.533 31.8284 13

13 -1 -7 753.495 35.0843 12

-13 7 -1 716.961 24.8178 13

-7 13 1 766.061 31.6592 22

-7 13 -1 667.400 30.1887 24

7 13 -1 706.699 27.1686 23

1 7 -13 701.207 25.8552 23

-1 7 -13 690.747 24.5835 23

-1 13 -7 593.168 29.3645 23

-1 13 -7 707.900 29.0101 22

-13 7 -1 740.158 24.1898 22

-13 -1 -7 686.357 24.8851 22

1 13 -7 663.405 26.3963 22

-13 1 -7 662.397 25.3582 22

-7 13 -1 733.946 30.3715 23

-7 13 1 702.978 28.7524 23

-1 7 -13 731.450 28.2073 22

-7 13 -1 693.886 30.8345 22

1 7 -13 743.649 25.7329 22

1 13 -7 714.922 32.0651 23

1 13 -7 639.629 24.4170 19

7 13 1 713.814 33.8325 19

-13 7 1 683.308 31.2343 21

1 13 -7 722.899 31.0526 20

-1 13 -7 696.963 31.3632 20

-7 13 -1 689.977 29.6510 21

13 7 -1 675.236 26.1307 16

7 13 -1 716.216 32.4348 16

1 7 -13 732.596 30.6695 15

13 7 -1 642.497 31.0799 18

13 7 1 736.871 31.9269 18

7 13 -1 704.519 32.0367 18

7 13 1 738.063 33.5407 18

-1 13 -7 697.262 24.9339 15

1 13 -7 650.071 22.6058 15

-7 1 -13 670.817 25.8925 15

-3 -7 -13 108.357 11.1334 8

-13 7 3 101.093 10.2988 9

-7 3 -13 107.208 12.7474 8

-13 3 -7 77.6480 10.5395 8

-13 7 3 96.8637 12.6227 10

-13 7 -3 84.5914 11.4817 10

-7 -3 -13 76.8162 11.6170 8

-13 -3 -7 88.7824 11.1078 10

-7 13 3 117.622 12.5100 9

-3 -7 -13 96.9153 12.2290 7

-13 7 3 109.627 11.7202 6

-13 -7 -3 96.2362 10.6387 6

-13 7 -3 110.193 11.4070 6

-13 -3 -7 112.895 12.7883 6

-13 3 -7 132.348 14.1393 6

-13 -7 3 89.0511 10.4903 6

-7 3 -13 94.6958 10.9713 7

3 13 7 107.058 11.3150 29

7 13 3 110.142 11.8736 28

-3 7 13 92.0782 10.7289 29

-7 13 -3 85.1332 10.0129 30

3 13 7 79.5355 9.78579 30

-7 13 3 95.9408 11.5100 30

-3 13 7 108.741 12.3906 30

7 13 3 90.3996 9.23169 30

7 13 -3 110.476 12.1804 28

-3 -7 13 86.3616 10.3675 25

-3 7 13 94.2930 10.2972 25

3 7 -13 116.055 11.9303 27

-7 -3 13 86.2060 11.5826 25

-7 3 13 99.9518 12.2247 25

-13 3 7 106.437 12.4675 25

3 13 7 82.2565 10.5444 26

7 13 3 81.0129 9.84276 26

-13 7 -3 94.7144 10.1413 24

3 -7 13 97.9669 10.6917 25

-3 13 7 81.4122 10.4898 26

-13 -3 7 88.3762 11.7548 25

3 7 13 119.162 11.5539 25

7 -3 -13 65.0642 10.9246 12

7 3 -13 122.358 13.7179 12

13 7 -3 105.335 11.5344 12

-13 3 -7 79.7403 10.1258 14

-7 13 -3 86.2912 10.5236 13

3 -7 -13 84.8825 10.0892 12

3 7 -13 91.0133 10.9864 12

13 3 -7 101.681 13.2601 12

13 -3 -7 89.9697 12.8677 12

-3 13 7 116.078 11.9463 13

13 -7 -3 84.0080 11.0349 12

-3 13 -7 81.3680 10.2534 24

-3 7 -13 92.3502 11.0360 22

3 7 -13 96.1263 10.1050 23

-7 3 -13 109.066 12.6386 22

-7 13 -3 80.5853 10.9046 23

-13 -3 -7 96.7907 8.56472 22

-3 7 -13 92.3258 8.33657 23

-13 3 -7 94.0845 10.1389 22

-7 13 3 104.241 10.3668 23

3 13 -7 75.4563 11.0528 23

7 13 -3 71.9781 10.9861 19

-3 7 -13 119.128 12.5310 20

3 13 -7 123.126 12.4883 20

-3 13 -7 116.485 12.7600 20

3 13 7 109.268 13.4229 19

-13 3 7 91.6847 10.0104 21

-3 13 -7 84.1005 10.9505 22

-7 13 -3 93.4203 10.6132 21

7 13 3 99.6231 13.0441 19

-13 7 -3 79.0202 8.92469 22

-13 7 3 94.7386 11.7946 21

3 13 -7 97.7240 10.3097 19

-13 7 -3 88.8364 11.4494 21

13 7 3 116.044 11.2299 19

13 7 -3 70.7085 8.50900 16

13 7 -3 134.739 14.2903 18

13 7 3 113.731 12.4217 18

-3 13 -7 105.181 9.95148 15

7 13 -3 82.4416 11.4229 18

7 13 -3 92.5498 12.2987 16

-7 3 -13 111.498 11.0891 15

-3 7 -13 113.952 12.0969 15

3 13 -7 80.7548 8.82803 18

-7 5 -13 76.4026 11.1956 8

-7 -5 -13 106.903 13.1172 8

-13 5 -7 97.1548 10.3638 8

-13 7 -5 91.1111 11.9567 10

-13 5 -7 86.3606 12.3498 10

-5 -7 -13 96.2316 11.3033 8

-13 -7 -5 77.0505 9.92938 6

-13 7 -5 90.1727 10.9014 6

-13 -5 -7 95.8150 11.8007 6

-13 5 -7 104.525 12.4481 6

-7 -5 -13 96.6552 13.2640 7

-5 -7 -13 99.0243 12.7917 7

-13 7 5 75.5121 8.16631 30

5 13 7 111.925 11.4169 29

7 13 5 92.2766 8.90638 29

-5 7 13 113.879 11.0308 29

-7 13 5 116.872 13.0544 30

5 13 7 82.3986 9.58805 28

5 13 7 91.7939 9.15567 30

-7 13 -5 104.098 10.3473 30

7 13 -5 96.9454 11.8069 28

5 13 -7 91.4953 10.7234 28

-5 13 7 101.466 12.4695 29

7 13 5 83.1165 10.5987 28

-5 13 -7 112.775 12.5593 24

5 7 -13 101.352 11.7823 27

-5 7 13 77.8074 10.6912 25

-5 -7 13 94.7545 10.4664 25

-7 5 13 96.9816 11.8638 25

-7 -5 13 75.1809 11.3122 25

7 13 5 68.3460 9.61207 26

7 -5 -13 86.6162 11.5309 12

7 5 -13 81.9952 11.8680 12

-13 7 -5 76.5457 9.55865 14

-13 5 -7 89.2287 10.1566 14

-5 13 7 96.6226 12.0169 13

-7 13 5 82.8510 11.3997 13

13 5 -7 58.6476 10.6771 12

13 -5 -7 70.5113 11.3140 12

5 -7 -13 84.6092 10.2644 12

5 7 -13 73.3256 10.2580 12

13 7 -5 95.4920 11.4636 12

13 -7 -5 90.8353 10.9532 12

-5 7 -13 85.7420 11.5100 22

-7 13 -5 82.4565 11.0753 24

-7 5 -13 93.3499 12.1829 22

5 13 -7 83.3303 11.5319 23

-13 5 -7 113.065 11.0507 22

-7 13 -5 81.4485 8.88615 21

-7 5 -13 101.858 9.51544 20

-7 13 -5 110.145 12.6599 22

-5 7 -13 82.4583 10.1226 20

5 13 7 92.3159 12.4974 19

7 13 5 101.561 12.9632 19

5 13 -7 78.4445 9.72092 20

-13 7 -5 118.473 12.7218 21

-13 7 -5 78.0945 9.36171 22

-5 13 -7 121.085 13.4395 20

-5 13 -7 92.2956 11.8536 22

-13 7 5 96.9783 11.7487 21

-13 5 7 95.8465 10.8917 21

7 13 -5 88.7241 12.3358 16

-5 13 -7 84.5953 10.2251 15

13 7 -5 101.304 13.7142 18

7 13 -5 85.1580 11.3869 18

-7 5 -13 84.9186 10.7832 15

-5 7 -13 97.6117 11.5002 15

5 13 -7 114.216 11.5014 18

-7 -7 -13 536.818 29.4002 7

-13 7 -7 555.945 27.3049 10

-7 -7 -13 522.773 26.5031 8

-13 -7 -7 491.763 23.8314 6

-13 7 -7 523.913 25.0284 6

7 13 7 478.393 21.9364 29

-7 7 13 484.354 21.6282 29

-7 13 7 534.415 27.1854 30

-7 13 7 514.943 27.1786 29

-13 7 7 493.864 21.6125 30

7 13 -7 545.437 24.4421 28

7 13 7 556.788 23.8166 28

7 13 -7 531.373 24.6018 27

7 13 7 514.174 25.4502 26

-7 7 13 511.842 24.3868 25

-7 -7 13 480.438 23.4746 25

-7 13 -7 567.930 28.4055 24

7 -7 -13 540.086 24.9413 12

7 7 -13 523.058 25.2497 12

13 -7 -7 474.682 23.8008 12

13 7 -7 471.748 24.1325 12

-7 13 7 511.226 26.9471 13

-13 7 -7 519.629 24.3766 22

7 13 -7 520.400 27.0834 23

-7 13 -7 537.507 26.6918 23

-7 7 -13 521.855 27.6329 22

-7 13 -7 491.199 26.7356 22

7 13 -7 498.430 22.0487 20

-7 7 -13 516.710 22.6443 20

-13 7 7 496.308 24.5737 21

7 13 7 482.096 27.1950 19

7 13 -7 446.835 24.4716 18

-7 13 -7 507.674 24.4906 15

-7 7 -13 532.932 26.4813 15

-13 7 -7 445.920 20.4608 14

13 7 -7 578.293 30.5817 18

-9 13 1 780.457 33.3619 9

-13 1 -9 748.832 34.0363 8

-13 9 1 770.494 30.4766 9

-13 9 -1 716.550 31.5902 10

-9 13 -1 801.345 33.9742 9

-13 9 -1 810.979 31.2496 9

-13 9 1 823.575 34.0724 10

-13 -1 -9 749.828 35.2159 8

-9 -1 -13 762.559 33.8499 7

-13 1 -9 725.834 34.2330 10

-13 -1 -9 793.206 35.2675 10

-9 1 -13 750.644 31.7199 7

-9 1 -13 782.358 35.1129 8

-1 -9 -13 755.991 31.4223 7

-13 9 1 690.673 26.3201 6

-13 9 -1 709.876 26.5887 6

-13 -1 -9 808.260 36.0665 6

-1 9 13 778.965 32.9395 29

-9 13 -1 768.171 28.6152 30

9 13 1 733.571 32.7336 28

-9 13 1 758.186 29.9553 30

1 13 9 770.498 30.9727 30

-1 13 9 756.621 32.4972 30

1 9 13 750.297 28.7744 30

-1 9 13 803.089 31.5838 30

1 13 9 772.926 32.8680 29

1 9 13 759.286 26.5622 25

-1 13 -9 726.119 28.0603 24

1 9 -13 766.506 32.6105 27

-9 -1 13 696.180 33.2010 25

1 9 13 759.251 28.4943 26

-1 9 13 744.732 26.2597 26

1 13 9 797.216 32.0915 26

9 13 1 711.891 26.0075 26

-1 13 9 796.020 31.6857 26

-1 9 13 735.128 26.5971 25

-13 -1 9 729.020 33.8181 25

-13 9 -1 752.548 27.8881 24

9 -1 -13 733.773 34.9485 12

1 13 9 799.590 28.5394 13

-1 13 9 735.905 29.2962 13

13 -1 -9 784.085 36.2225 12

-9 13 -1 718.823 29.9602 13

-9 13 1 807.538 32.8355 13

-13 9 -1 784.615 27.0377 13

-13 9 1 783.014 29.7430 13

13 9 -1 719.111 27.3249 12

-9 13 1 768.843 31.9996 22

1 9 -13 746.185 29.0592 23

-1 13 -9 759.679 29.9879 22

-1 13 -9 737.814 32.8654 23

-1 9 -13 711.103 27.5836 23

-9 1 -13 711.384 33.2782 22

1 13 -9 767.111 27.5116 22

-13 -1 -9 749.454 28.5664 22

-13 1 -9 698.231 28.5175 22

-9 13 -1 760.003 32.3485 23

-13 9 -1 751.944 26.8461 22

-9 13 1 791.349 31.9121 23

-9 13 -1 773.054 33.0077 22

-1 9 -13 757.374 29.1745 22

9 13 1 792.350 36.4095 19

1 13 -9 808.137 34.0046 20

-1 13 -9 816.841 34.9564 20

-9 13 1 791.410 33.9512 21

-9 13 -1 835.492 33.5620 21

-13 9 1 698.164 33.0631 21

-13 9 -1 729.477 33.0865 21

13 9 1 751.932 32.9433 19

9 13 -1 760.865 36.2142 19

13 9 -1 711.448 29.3750 16

9 13 -1 744.837 33.9087 16

13 9 -1 779.004 35.6639 18

13 9 1 807.418 35.8809 18

9 13 -1 766.648 35.4890 18

9 13 1 834.584 36.8414 18

-9 1 -13 775.743 27.2091 15

-1 13 -9 753.707 27.8064 15

1 13 -9 768.558 26.6155 15

-1 9 -13 721.925 31.3328 15

1 9 -13 748.325 31.3791 15

-9 13 3 157.499 14.8402 9

-13 9 3 140.394 12.7067 9

-9 3 -13 115.971 11.5541 7

-3 -9 -13 136.101 13.8397 7

-13 9 3 146.528 14.8692 10

-13 9 -3 136.126 13.3021 10

-13 3 -9 162.969 16.0259 10

-13 3 -9 132.458 13.8886 8

-9 -3 -13 125.942 14.7460 8

-9 3 -13 136.243 14.2343 8

-9 -3 -13 122.262 14.4958 7

-13 3 -9 98.8375 12.9310 6

-13 9 3 91.2090 9.60621 6

-13 9 -3 112.039 10.2390 6

-13 -3 -9 158.305 15.2071 6

3 13 9 125.988 13.2089 29

-9 13 -3 120.109 10.5126 30

-3 9 13 129.811 12.9746 29

9 13 -3 159.007 14.7204 28

9 13 3 141.109 13.5925 28

3 13 9 127.115 11.4637 30

-9 13 3 130.857 12.5404 30

-3 13 9 135.723 14.2094 30

-3 13 9 121.838 13.3623 29

3 9 13 104.523 9.74684 25

-13 -3 9 119.223 13.5107 25

-3 9 13 112.835 10.4861 25

-9 3 13 126.592 13.6628 25

9 13 3 122.983 11.3240 26

3 13 9 137.241 13.4785 26

-13 9 -3 132.069 12.3468 24

-3 13 9 130.378 11.9186 26

-3 13 -9 125.057 12.2094 24

-13 3 9 125.173 13.5646 25

-9 -3 13 123.050 13.6179 25

-9 13 -3 123.768 13.2863 24

3 9 -13 154.614 14.4189 27

13 3 -9 141.455 14.6071 12

9 3 -13 113.673 13.9050 12

9 -3 -13 126.201 13.9206 12

-3 13 9 115.992 12.1916 13

-9 13 3 155.915 14.3293 13

-13 9 3 120.404 12.1738 13

13 -3 -9 133.156 14.5419 12

-9 13 -3 119.494 11.3834 13

13 9 -3 96.7199 10.1802 12

-3 13 -9 139.499 14.1721 23

-13 9 -3 106.698 10.4622 22

-13 -3 -9 137.707 11.2931 22

-3 9 -13 115.158 10.3810 23

3 9 -13 119.852 11.8824 23

-9 13 -3 137.312 13.3926 22

-9 13 -3 144.474 13.9698 23

-13 3 -9 124.233 12.2059 22

-3 13 -9 112.675 12.7190 22

-3 9 -13 139.265 13.3684 22

13 9 3 114.083 12.2990 19

3 13 -9 130.412 13.6091 20

-3 9 -13 123.154 13.7018 20

9 13 3 131.503 14.7615 19

-13 9 3 133.249 13.8005 21

-3 13 -9 138.776 14.6088 20

-13 9 -3 143.444 14.1465 21

-9 13 -3 101.207 11.2569 21

3 13 -9 116.069 10.7787 19

3 9 -13 132.803 12.4481 15

13 9 -3 101.069 11.0432 16

9 13 -3 111.512 13.6064 16

9 13 -3 131.582 14.5712 18

13 9 3 177.138 15.9705 18

-9 3 -13 114.656 11.0975 15

-3 13 -9 106.666 11.0961 15

3 13 -9 110.454 9.02265 15

13 9 -3 147.221 15.4671 18

-13 3 -9 141.143 12.3276 14

-9 5 -13 137.458 13.8991 8

-13 9 -5 181.875 14.8979 10

-13 -5 -9 137.008 16.2242 8

-5 -9 -13 179.403 16.0020 7

-13 9 5 153.380 15.4753 10

-13 5 -9 188.542 16.5885 10

-9 -5 -13 173.705 16.6390 8

-13 5 -9 150.008 13.0056 8

-5 -13 -9 157.636 12.7616 7

-9 13 5 164.461 15.1855 9

-5 -9 -13 161.583 12.9723 8

-13 9 5 184.517 14.3907 9

-13 9 5 147.405 12.1830 6

-13 9 -5 165.591 12.1852 6

-13 -5 -9 193.545 15.8744 6

-13 5 -9 180.416 15.6352 6

5 13 9 149.935 13.5411 29

-5 13 9 153.959 14.9473 29

-5 9 13 192.045 15.1307 29

-9 13 5 176.331 14.8845 30

13 9 -5 166.002 11.7157 27

-13 9 5 155.260 11.7209 30

9 13 5 174.641 14.7424 28

-5 13 9 192.986 16.2275 30

9 13 -5 167.060 14.2019 28

-13 9 -5 179.877 14.5817 24

-9 5 13 159.516 14.7375 25

-5 9 13 161.413 11.9516 25

9 13 5 142.748 12.5236 26

-9 -5 13 171.620 15.4036 25

-13 5 9 158.767 15.0473 25

-13 -5 9 184.797 15.2649 25

5 13 9 150.947 13.8451 26

-5 13 -9 206.786 16.2730 24

5 9 13 127.678 10.9519 25

9 -5 -13 152.974 15.0034 12

9 5 -13 181.781 16.2300 12

13 -5 -9 176.611 15.9011 12

13 9 -5 152.755 12.1292 12

-5 9 13 149.911 12.6909 13

-13 9 5 165.739 14.6669 13

-5 13 9 187.112 15.2956 13

5 9 -13 139.982 11.6833 12

13 5 -9 161.081 15.4575 12

-13 9 -5 156.140 13.2282 22

5 9 -13 191.254 15.0313 23

5 13 -9 161.544 15.5505 23

-9 13 -5 158.402 14.9261 22

-5 9 -13 170.604 11.8444 23

-5 13 -9 215.685 16.9505 22

-5 13 -9 196.760 16.0641 23

-13 5 -9 178.127 14.5145 22

-5 9 -13 171.862 15.1083 22

5 13 -9 219.184 16.1177 20

-5 9 -13 209.186 16.2367 20

-9 13 5 199.898 17.0220 21

-13 9 5 170.672 15.3975 21

-9 13 -5 159.890 12.3774 21

-13 5 9 154.217 12.4936 21

-13 9 -5 153.299 13.8017 21

13 9 5 183.183 13.6547 19

9 13 5 178.731 16.4755 19

5 9 -13 162.716 13.2974 15

5 13 -9 157.573 12.9199 18

-5 13 -9 159.974 13.5464 15

-9 5 -13 159.859 13.6856 15

-13 5 -9 181.918 12.5425 14

13 9 -5 161.824 16.6988 18

9 13 -5 151.638 15.3327 18

9 13 -5 167.811 15.7668 16

-7 -9 -13 406.134 24.7491 7

-13 -7 -9 459.394 26.1538 8

-13 9 -7 424.834 21.7246 10

-13 7 -9 417.190 23.1275 10

-9 -7 -13 429.172 24.6519 8

-9 -7 -13 433.872 26.0458 7

-7 -13 -9 410.172 21.1710 7

-7 -9 -13 450.609 22.4299 8

-13 9 -7 431.379 19.3932 6

-13 -7 -9 426.458 21.7698 6

-13 7 -9 406.196 21.6305 6

13 7 -9 433.061 18.5503 28

13 9 -7 444.704 21.1917 28

13 9 7 447.813 20.7639 28

7 13 9 409.396 21.0440 29

9 13 7 416.701 18.2379 29

9 7 -13 452.880 24.4326 27

-9 13 7 423.307 23.1622 30

-13 9 7 419.934 19.9444 30

-7 13 9 393.187 23.5653 29

-13 7 9 389.043 19.9776 30

9 13 -7 410.476 20.8592 28

-7 9 13 446.649 21.6468 29

9 13 7 430.561 20.8441 28

13 9 -7 435.867 20.6385 27

7 13 -9 436.226 19.1308 28

9 13 -7 419.655 20.7628 27

7 13 -9 411.221 22.2424 27

-9 7 13 367.343 20.8159 25

9 13 7 429.441 22.2659 26

7 9 -13 476.319 25.3201 27

-7 9 13 386.315 18.5989 25

-9 -7 13 421.679 21.5086 25

-7 13 -9 437.771 24.1212 24

-9 13 -7 454.858 25.0769 24

9 -7 -13 429.898 21.9558 12

9 7 -13 410.666 22.0964 12

13 9 -7 374.276 18.6458 12

13 -7 -9 395.865 21.2991 12

13 7 -9 434.999 22.3447 12

-7 13 9 447.748 24.1930 13

-9 13 7 457.246 25.3419 13

-7 9 13 434.550 21.7154 13

7 9 -13 409.346 19.1915 12

-13 7 -9 406.479 21.9974 22

-13 9 -7 412.679 21.9440 22

-7 13 -9 457.454 25.5238 22

-7 13 -9 420.844 22.6017 23

-9 13 -7 432.855 23.3315 23

7 13 -9 420.285 24.0968 23

-9 7 -13 421.577 24.5875 22

-7 9 -13 468.450 25.5063 22

7 13 -9 438.212 21.6850 20

-7 13 -9 464.123 25.2535 20

-13 9 7 394.080 22.0833 21

-13 7 9 489.173 21.7595 21

9 13 7 416.686 24.1881 19

-7 9 -13 450.392 22.2048 20

-9 13 7 428.965 24.4102 21

9 13 -7 394.590 23.4910 18

13 9 -7 441.362 26.5802 18

7 13 -9 421.958 22.2772 18

-7 13 -9 443.284 22.9288 15

13 7 -9 415.591 26.1596 18

-9 7 -13 387.788 22.0861 15

-7 9 -13 430.894 23.8203 15

-9 -9 -13 543.119 28.0321 7

-13 -9 -9 518.036 26.2265 8

-9 -9 -13 537.492 24.6376 8

9 13 9 503.762 21.3551 29

13 9 -9 508.530 23.0920 27

-9 13 9 540.847 26.0310 30

-13 9 9 522.030 22.6298 30

-9 9 13 580.638 27.0550 30

9 13 -9 552.419 24.2354 27

9 13 9 537.349 24.8302 26

9 9 -13 515.754 25.5409 27

-9 13 -9 513.449 25.9366 24

-9 13 9 500.720 25.8729 13

-9 9 13 546.784 25.0628 13

-9 9 -13 537.500 26.6281 22

-13 9 -9 511.001 24.4354 22

-9 13 -9 517.053 24.1594 23

9 13 -9 524.929 26.1919 23

-9 13 9 495.466 24.6774 21

-13 9 9 517.887 23.3504 21

13 9 -9 507.047 28.3044 18

9 13 -9 473.401 24.7646 18

-9 9 -13 492.614 24.9331 15

-11 13 1 43.2542 8.84854 9

-13 11 1 47.9854 8.37962 9

-11 13 -1 63.3372 10.1740 9

-13 1 -11 48.2026 10.3574 8

-13 -1 -11 59.9685 10.6140 8

-13 11 1 47.9048 8.41388 10

-13 11 -1 56.8584 8.73203 10

-11 1 -13 55.8444 10.2473 8

-13 -1 -11 47.0413 9.60307 7

-13 -1 -11 50.4640 9.80322 6

-13 1 -11 49.7031 8.54577 7

-11 -1 -13 47.1219 9.63134 7

-11 1 -13 48.8637 8.71651 7

-1 11 13 57.3471 9.33984 30

13 11 1 64.1505 9.86723 28

11 13 1 50.2594 9.31334 28

1 11 13 83.1708 10.8772 29

-1 11 13 77.6557 10.4710 29

-1 13 11 71.3847 10.4380 29

-11 13 1 51.6492 7.37271 30

1 13 11 46.2167 8.34371 30

-1 13 11 43.7877 8.77988 30

1 11 13 46.2335 7.50665 30

-11 -1 13 49.4924 9.88585 25

-13 -1 11 36.6755 8.91942 25

1 11 13 38.8718 7.14573 26

1 13 11 56.2259 8.92622 26

-1 11 13 54.3084 7.43585 26

-1 13 11 45.1852 8.01022 26

11 -1 -13 40.7958 9.31667 12

13 -1 -11 70.0551 11.9193 12

-13 1 -11 53.7175 8.62925 14

-13 11 -1 40.2240 6.82235 13

-1 13 11 44.8711 7.24410 13

-11 13 -1 48.5287 8.32596 13

-11 13 1 44.6242 8.71380 13

-13 11 1 52.3259 8.45802 13

-1 13 -11 63.6364 9.95738 23

-1 11 -13 35.6067 7.35950 23

-13 11 -1 38.5699 7.23293 24

-11 13 -1 67.2088 9.78563 23

-11 1 -13 50.8977 9.34671 22

-13 -1 -11 55.7632 8.62857 22

-11 -1 -13 53.1196 9.26668 22

-13 1 -11 41.2187 7.98484 22

1 11 -13 42.9398 8.08220 23

1 13 -11 63.0200 9.98619 23

-1 13 -11 41.8239 6.95996 24

13 11 -1 41.9680 9.89762 19

-1 11 -13 44.0424 7.49068 22

11 13 -1 46.5378 9.85819 19

13 11 1 47.0639 9.42163 19

-11 13 -1 56.1904 9.79561 22

-1 13 -11 60.3814 8.34004 22

-13 11 -1 50.8814 7.76668 22

1 11 -13 45.1105 8.84812 20

11 13 1 45.6282 10.1857 19

1 13 -11 57.8857 10.1779 20

-1 13 -11 52.6255 9.46912 20

-11 13 1 64.1201 10.2880 21

-11 13 -1 41.1487 8.42224 21

-13 11 -1 39.2731 9.11956 21

13 11 -1 52.0446 9.44647 16

11 13 -1 50.9568 9.27278 16

13 11 -1 60.9084 10.9756 18

13 11 1 70.4079 11.6179 18

1 13 -11 41.6691 7.37041 15

11 13 1 45.7231 10.3566 18

-1 11 -13 48.4910 8.66467 15

1 11 -13 53.7611 8.42547 15

-1 13 -11 43.0283 7.50361 15

-11 13 3 382.910 22.7628 9

-13 11 3 383.392 21.4002 9

-3 -11 -13 424.957 21.9702 7

-13 11 -3 377.605 19.3425 10

-11 3 -13 370.865 18.6491 7

-13 11 3 379.407 21.4428 10

-11 -3 -13 389.523 25.5192 8

-13 3 -11 380.585 22.5937 8

-11 -3 -13 374.097 23.7712 7

-11 3 -13 399.913 23.5786 8

-13 -3 -11 417.948 24.4264 6

-13 3 -11 365.274 23.2936 6

13 11 -3 419.167 22.8429 28

13 11 3 424.598 23.0205 28

3 13 11 415.335 22.9223 29

-3 11 13 404.447 22.9963 29

-11 13 3 378.561 19.3990 30

11 13 -3 425.633 23.4120 28

-3 13 11 382.837 23.1138 29

3 13 11 356.579 17.9243 30

-3 13 11 423.118 23.6789 30

-3 11 13 437.549 23.6358 30

11 13 3 383.995 22.2748 28

-13 11 -3 412.419 21.1057 24

11 13 3 392.486 17.9375 26

-11 -3 13 417.498 23.8592 25

-3 11 -13 389.196 19.1824 24

13 11 3 398.492 16.7006 26

3 11 13 424.854 21.3234 26

3 13 11 394.507 21.6048 26

-3 13 -11 426.048 20.7387 24

-11 3 13 409.682 23.9162 25

-3 13 11 400.226 19.6568 26

-13 3 11 367.034 22.8415 25

-13 -3 11 390.340 23.4526 25

-11 13 -3 399.070 22.2090 24

11 -3 -13 447.675 25.5987 12

11 3 -13 421.498 25.1854 12

13 -3 -11 432.034 25.4135 12

-3 13 11 391.623 19.9208 13

-11 13 3 406.087 22.4469 13

-13 11 3 416.516 21.9532 13

13 3 -11 349.040 23.3372 12

-3 11 -13 392.840 21.2142 22

-13 -3 -11 398.699 19.8889 22

-3 13 -11 386.917 21.5065 22

3 11 -13 352.855 20.8338 23

3 13 -11 402.985 23.4644 23

-3 13 -11 441.584 23.0946 23

-3 11 -13 392.327 19.9119 23

-11 3 -13 452.479 24.9027 22

-13 11 -3 410.737 20.7276 22

-11 13 -3 362.900 21.3875 22

-13 3 -11 400.587 21.6516 22

-11 13 -3 455.992 23.9211 23

3 13 -11 430.970 23.7137 20

13 11 3 394.478 22.9840 19

-3 11 -13 452.951 25.2175 20

11 13 3 403.527 24.5613 19

-13 11 3 409.027 24.2437 21

-11 13 -3 373.491 20.7669 21

-13 11 -3 367.476 21.4841 21

11 13 -3 410.943 25.4814 19

13 11 -3 422.586 25.9822 18

-11 3 -13 410.227 19.6542 15

11 13 -3 362.872 23.6575 18

-3 13 -11 436.290 21.4548 15

-13 3 -11 390.189 18.5995 14

-3 11 -13 396.377 22.2115 15

3 13 -11 376.113 17.5499 15

3 11 -13 364.871 19.4959 15

13 11 -3 392.439 21.2102 16

11 13 -3 386.283 22.8387 16

-11 13 5 307.496 20.0514 9

-13 11 5 363.925 20.5579 9

-11 5 -13 323.810 19.3763 8

-13 11 -5 294.018 16.2780 10

-13 -5 -11 342.926 22.9680 8

-5 -13 -11 354.239 18.5452 7

-11 -5 -13 354.818 22.9527 8

-13 11 5 320.538 20.2513 10

-11 -5 -13 324.980 22.2840 7

-13 5 -11 298.475 17.6600 8

-5 -11 -13 308.124 19.3102 7

-13 -5 -11 333.350 20.5221 6

-13 5 -11 357.241 21.4204 6

13 11 -5 363.050 20.1394 28

5 13 11 361.952 20.6453 29

13 11 5 323.801 18.8861 28

-5 11 13 311.213 19.7035 29

-11 13 5 304.799 17.9783 30

11 13 -5 343.898 20.1424 28

11 13 5 371.157 19.9254 28

-5 13 11 352.385 21.5433 29

-5 13 11 350.843 21.9320 30

-5 11 13 344.392 21.2271 30

5 11 -13 326.772 20.5021 27

-5 11 -13 331.800 18.5937 24

13 11 5 326.311 16.5357 26

5 11 13 336.183 19.5907 26

5 13 11 350.164 20.2211 26

11 13 5 321.875 17.2035 26

-11 5 13 280.714 19.0683 25

-11 -5 13 308.789 19.7561 25

-13 5 11 333.796 20.6018 25

-13 -5 11 293.073 19.3115 25

-5 13 -11 307.345 18.5870 24

-13 11 -5 336.778 19.5512 24

-11 13 -5 332.765 20.4890 24

11 -5 -13 341.983 21.0412 12

11 5 -13 329.819 21.2656 12

13 -5 -11 337.244 20.9030 12

-5 13 11 331.412 19.0828 13

-5 11 13 322.761 17.4663 13

-11 13 5 331.164 20.7661 13

-13 11 5 339.316 20.3995 13

13 5 -11 293.754 20.0845 12

-5 11 -13 320.301 20.0670 22

-5 13 -11 364.302 21.3743 22

-5 13 -11 377.904 20.1961 23

5 13 -11 340.492 20.9913 23

-13 -5 -11 291.557 16.3441 22

-13 11 -5 285.762 17.8109 22

-11 13 -5 318.884 20.1659 22

-5 11 -13 333.231 17.0254 23

5 11 -13 337.749 20.0092 23

-11 13 -5 323.578 20.0456 23

-11 5 -13 333.440 21.4419 22

-13 5 -11 330.161 19.8584 22

5 13 -11 370.018 21.1787 20

13 11 5 322.549 18.9347 19

11 13 5 341.665 21.4332 19

-11 13 5 365.987 22.1749 21

-13 11 5 313.245 20.6780 21

-5 13 -11 357.520 22.0904 20

-11 13 -5 304.131 16.9139 21

-5 11 -13 320.273 20.4607 20

5 13 -11 300.049 16.7614 19

-13 11 -5 309.302 18.1360 21

13 11 -5 325.026 22.5156 18

5 11 -13 295.484 16.9557 18

11 13 -5 332.535 22.1227 18

-11 5 -13 316.707 18.4931 15

-5 13 -11 340.985 19.4051 15

-5 11 -13 341.013 20.5911 15

11 13 -5 330.161 20.4587 16

5 11 -13 321.782 16.9711 15

-13 11 7 44.1478 8.01994 9

-13 -7 -11 43.4125 9.12896 8

-13 11 7 39.4211 7.79834 10

-11 13 7 35.4101 6.35014 10

-13 -11 -7 52.3507 8.65854 8

-11 13 7 53.0106 8.62076 9

-11 -7 -13 59.6430 10.1366 8

-11 -7 -13 67.7683 11.2656 7

-7 -13 -11 35.6921 7.00707 7

-7 -11 -13 56.4165 9.19519 7

11 13 7 32.8792 6.25246 28

-7 13 11 44.7394 8.21839 29

-7 11 13 41.4581 8.38142 30

-13 7 11 42.9915 7.71478 30

13 11 -7 53.4081 7.82952 28

13 11 7 40.8453 6.80633 28

7 13 11 45.2339 7.88699 29

-11 13 7 51.7509 8.10873 30

-13 11 7 44.0601 6.81859 30

-7 11 13 40.4166 7.53094 29

11 13 -7 59.2474 8.22817 28

7 13 11 51.5280 8.58658 26

11 7 -13 41.2536 8.50382 27

7 11 -13 48.4573 8.52588 27

13 11 -7 48.5144 6.71941 27

13 11 7 59.3169 7.89418 26

7 11 13 74.0684 9.78352 26

11 13 7 48.2547 7.56663 26

-11 -7 13 38.1332 6.72886 25

-11 7 13 47.2569 7.81112 25

11 -7 -13 41.5487 7.64981 12

11 7 -13 49.4788 8.12243 12

13 -7 -11 44.3463 7.74008 12

13 7 -11 36.9697 7.39223 12

-7 13 11 53.3819 8.64349 13

-7 11 13 38.2424 7.02324 13

-13 11 7 62.7775 9.44294 13

-7 11 -13 45.9163 7.83011 24

-13 11 -7 56.7204 9.05656 24

-7 13 -11 52.3578 9.08669 24

-7 13 -11 35.2846 6.89685 23

-7 11 -13 43.6115 6.49843 23

-13 7 -11 47.0058 8.81865 22

-11 7 -13 41.8980 8.93188 22

-11 13 -7 45.4066 8.17175 23

-11 13 -7 37.4974 8.29584 24

7 11 -13 43.3794 8.43364 23

-7 11 -13 51.7163 8.51792 22

-11 13 -7 61.9355 9.75048 22

-13 11 -7 42.1065 8.07389 22

11 13 7 46.1494 8.56647 19

7 13 -11 46.5017 7.70194 20

-7 13 11 49.8805 8.72476 21

-7 11 -13 47.4732 7.97608 20

-11 13 7 49.0993 8.85279 21

-7 13 -11 50.0292 9.28041 20

-7 13 -11 39.8104 8.37778 22

-13 11 7 48.1355 8.65814 21

-11 7 -13 43.6543 7.99045 15

7 11 -13 44.6642 6.43627 15

7 11 -13 42.3115 7.55269 18

7 13 -11 37.2649 7.03234 18

11 13 -7 48.1632 9.16751 18

-7 13 -11 50.0941 8.58286 15

-11 13 9 28.3114 6.71414 9

-13 -11 -9 41.3993 7.42830 8

-11 13 9 21.3242 5.04780 10

-13 11 9 28.0693 6.48552 10

-13 -9 -11 37.4027 7.44060 8

-13 11 9 32.6275 6.60585 9

-11 -9 -13 36.8166 7.56738 8

-11 -9 -13 18.5040 6.95464 7

-9 -13 -11 34.9371 6.45384 7

-9 -11 -13 26.1881 6.84209 7

-13 9 11 19.8611 5.25430 30

-9 11 13 36.9128 7.29450 30

-11 9 13 25.2060 6.25791 30

9 13 11 34.3657 6.06624 29

-11 13 9 23.2144 6.06991 30

-13 11 9 25.6534 5.22074 30

-9 13 11 25.7395 6.65405 30

11 13 9 29.5915 6.24968 26

13 9 -11 20.0146 5.52779 27

11 9 -13 28.7308 7.38686 27

13 11 -9 20.0551 5.31594 27

9 11 -13 35.3646 7.24302 27

13 11 9 32.4512 6.54576 26

9 11 13 31.0306 7.32548 26

-9 13 11 30.6555 6.99322 13

-11 13 9 36.4250 7.74978 13

-9 11 13 35.1389 6.81895 13

-11 9 13 31.9381 7.01092 13

-13 9 11 34.7007 7.28600 13

-9 11 -13 23.9293 6.52560 24

-9 13 -11 41.4723 7.95537 24

-9 13 -11 26.8353 5.61783 23

-13 11 -9 27.2899 6.65225 24

-11 13 -9 30.6653 6.56640 23

11 13 -9 24.7016 6.66333 23

9 11 -13 25.5537 6.86988 23

-11 9 -13 30.3404 7.26527 22

-9 13 -11 40.3202 7.99477 22

-13 11 -9 29.3263 7.03903 22

9 13 -11 35.7663 6.15916 20

-11 13 -9 18.3561 6.24959 22

-9 11 -13 29.2087 6.96821 22

-9 13 11 29.3273 6.41184 21

-11 13 9 29.2861 6.50216 21

-13 11 9 37.4323 6.80302 21

-13 9 -11 19.1550 5.83800 22

-9 11 -13 42.1041 7.93329 15

11 9 -13 27.5897 7.67563 18

9 11 -13 34.4279 7.83802 18

9 13 -11 24.1061 6.40490 18

11 13 -9 23.4367 6.99714 18

11 9 -13 29.3443 4.98892 15

13 11 -9 41.3666 8.64696 18

-11 -13 -11 231.898 13.5769 7

-11 -11 -13 223.691 14.5023 7

-13 11 11 186.031 12.8585 10

-13 -11 -11 226.542 12.8076 8

-13 -11 -11 197.605 14.4716 7

-11 13 11 217.295 13.5089 9

-13 11 11 223.255 12.9045 9

-11 13 11 245.305 13.8763 30

-13 11 11 216.874 12.3067 30

-11 11 13 230.013 13.9852 30

11 11 -13 195.077 12.8020 27

-11 11 -13 220.472 14.0483 24

13 11 -11 212.301 12.4321 27

-11 13 -11 210.105 13.8717 24

13 11 11 233.664 13.2644 26

11 13 11 212.380 12.7999 26

-13 11 -11 234.496 14.4673 24

-11 13 11 240.760 14.2999 13

-11 11 13 218.299 13.4084 13

-13 11 11 204.572 13.7382 13

11 11 -13 247.427 14.4668 23

-13 11 -11 233.235 14.1073 22

-11 13 -11 208.208 13.8626 22

-11 13 11 220.970 12.3347 21

11 13 -11 194.039 13.5502 19

11 13 -11 192.435 13.1823 18

11 11 -13 212.680 13.8554 18

13 11 -11 227.441 15.0042 18

-13 13 1 90.8148 10.9000 9

-13 -1 -13 120.296 13.6718 8

-13 1 -13 96.9886 12.3467 8

-13 1 -13 82.8390 9.68274 7

-13 -1 -13 102.512 11.5238 7

-1 13 13 115.568 12.3156 29

1 13 13 104.038 11.7156 29

1 13 13 92.8460 9.33029 30

-1 13 13 117.245 11.3154 30

13 13 1 66.1084 10.3025 28

-13 -1 13 81.4255 11.2274 25

1 13 13 110.531 10.5522 26

-1 13 13 91.1346 9.17490 26

13 -1 -13 69.7618 11.5837 12

-13 1 -13 76.5797 8.39121 14

-13 13 1 96.0919 10.0210 13

-13 13 -1 83.5691 8.69819 13

1 13 -13 85.3983 10.3409 23

-13 1 -13 95.1475 10.7004 22

-1 13 -13 75.4422 9.45292 23

-13 -1 -13 108.627 10.9419 22

1 13 -13 104.041 12.0901 20

13 13 -1 111.262 12.7262 19

-1 13 -13 90.4007 11.7440 20

13 13 1 76.0086 11.0670 19

-13 13 1 90.5839 11.9812 21

-13 13 -1 91.4787 11.2355 21

13 13 1 126.049 12.7530 16

13 13 -1 82.5314 10.4775 16

-1 13 -13 83.8946 9.51387 15

13 13 -1 86.1260 11.9457 18

1 13 -13 95.0786 9.35996 15

-13 -3 -13 383.269 21.9368 7

-13 13 3 361.735 20.6134 9

-13 -3 -13 363.589 22.8162 8

-13 3 -13 380.892 20.9367 8

13 13 -3 372.861 20.7836 28

13 13 3 421.527 21.7421 28

-3 13 13 387.970 21.8206 29

-3 13 13 330.030 19.6478 30

3 13 13 387.927 19.6993 26

-13 3 13 345.766 20.9225 25

-13 -3 13 309.024 19.9369 25

13 -3 -13 393.176 22.6785 12

13 3 -13 345.502 21.2735 12

-13 13 3 356.764 19.4151 13

-3 13 -13 371.663 18.8327 22

3 13 -13 358.077 20.2786 23

-13 -3 -13 345.201 18.4471 22

-3 13 -13 359.495 18.4591 23

-13 3 -13 351.847 19.8833 22

-13 13 -3 348.657 18.5876 22

3 13 -13 398.304 22.2040 20

-3 13 -13 383.443 22.4585 20

13 13 3 366.720 21.2113 19

-13 13 3 342.488 21.0691 21

-13 13 -3 381.156 19.8575 21

13 13 -3 387.107 23.1068 19

-3 13 -13 340.292 18.6207 15

3 13 -13 368.972 16.6552 15

13 13 -3 379.581 20.3332 16

-13 5 -13 374.557 18.5688 8

-13 13 5 411.147 21.2306 9

-13 -5 -13 412.245 23.4153 8

-13 -5 -13 469.446 24.3824 7

5 13 13 423.289 21.4583 29

13 13 -5 414.851 20.3432 28

13 13 5 396.729 19.7338 28

-5 13 13 399.046 21.1723 29

-5 13 13 416.741 21.8892 30

-13 13 -5 405.451 20.3797 24

5 13 13 412.780 20.0907 26

-5 13 -13 430.454 19.4646 24

13 13 5 364.988 15.8442 26

-13 5 13 365.439 20.2600 25

-13 -5 13 402.849 20.5768 25

13 -5 -13 391.738 20.9585 12

13 5 -13 397.908 21.2786 12

-5 13 13 402.936 18.0859 13

-13 13 5 433.436 21.4997 13

-5 13 -13 376.064 19.9288 22

5 13 -13 414.818 21.1716 23

-13 -5 -13 380.225 18.2015 22

-5 13 -13 407.841 18.4496 23

-13 13 -5 380.097 19.5446 22

-13 5 -13 415.626 21.1474 22

5 13 -13 436.993 21.8995 20

-5 13 -13 422.968 22.2946 20

-5 13 13 403.159 18.5926 21

13 13 5 422.002 20.9564 19

-13 13 5 416.781 21.9482 21

-13 13 -5 366.179 17.6834 21

13 13 -5 454.778 24.3699 19

-5 13 -13 410.162 20.4725 15

-13 13 7 54.4845 7.93034 9

-13 -7 -13 41.9918 8.24440 8

-7 -13 -13 37.9695 6.35450 7

13 13 -7 35.0150 5.75324 28

13 13 7 52.7002 6.58881 28

-13 7 13 36.1090 6.62179 30

7 13 13 53.1751 7.69748 29

-13 13 7 33.9843 5.50717 30

-7 13 13 41.1071 7.47070 30

13 7 -13 28.9402 6.63039 27

7 13 13 32.6170 6.56725 26

13 13 7 39.7910 5.88585 26

13 7 -13 37.1459 6.25983 12

-7 13 13 35.5486 6.32148 13

-13 13 7 38.4203 7.05047 13

13 -7 -13 26.9878 5.57606 12

-13 -7 -13 33.5171 5.51402 22

-7 13 -13 31.9935 6.22826 24

-13 13 -7 39.8367 6.94975 24

-7 13 -13 30.7337 5.64324 23

-13 7 -13 36.2766 6.88957 22

7 13 -13 50.3459 7.77905 23

-7 13 -13 52.4626 8.00386 22

-13 13 -7 41.6242 7.10681 22

7 13 -13 43.3966 7.28705 20

-13 13 7 46.4662 7.31247 21

13 13 7 32.9267 5.70346 19

13 13 -7 34.1659 7.30278 18

-7 13 -13 49.2710 7.47437 15

-9 -13 -13 73.6404 7.76304 7

-13 13 9 58.4483 7.28398 9

-13 -9 -13 66.4293 7.83136 8

-13 -13 -9 71.4025 8.53293 7

-13 -9 -13 73.3306 9.12221 7

-9 13 13 90.7676 9.13075 30

-13 9 13 72.0766 7.59749 30

9 13 13 63.0298 7.13059 29

13 9 -13 66.4751 7.42652 27

9 13 13 89.6313 8.43790 26

13 13 9 70.5269 6.81378 26

-9 13 13 83.7527 8.17215 13

-13 9 13 72.6544 8.24674 13

-9 13 -13 64.2585 7.81214 24

-13 13 -9 70.5715 8.18424 24

13 13 -9 57.7496 7.70642 23

9 13 -13 63.5385 7.84159 23

9 13 -13 73.5242 7.24866 20

-13 9 -13 68.1972 8.24842 22

-9 13 -13 72.6341 8.50533 22

-13 13 -9 66.8943 7.86162 22

13 13 -9 93.0143 9.71821 19

-13 13 9 71.3563 7.64102 21

13 13 -9 83.8419 9.29038 18

13 9 -13 68.2182 9.10851 18

0 14 0-0.65803 2.54631 9

-14 0 0 2.59295 4.72990 10

-14 0 0-1.43576 5.39926 6

0 14 0-1.25003 5.58540 30

0 0 14 1.27378 4.92897 25

0 14 0-2.29285 4.31118 26

-14 0 0 3.71151 4.91851 14

0 0 -14-1.36440 4.97768 12

0 14 0-0.93270 3.40276 23

0 14 0 1.11070 3.79041 19

0 14 0-0.94079 3.74020 16

0 14 2 112.253 9.34977 9

-2 14 0 115.949 10.3294 9

-14 2 0 113.188 12.8856 10

-14 -2 0 108.787 11.4187 10

-2 0 -14 101.771 12.7298 8

-14 0 2 91.9508 11.6684 10

-14 0 -2 96.9345 11.9561 10

-14 -2 0 117.106 13.7504 6

-14 2 0 103.527 12.4841 6

-14 0 -2 103.514 12.7872 6

2 14 0 104.051 12.0193 30

0 14 2 106.376 12.1211 30

0 14 2 96.7969 10.3322 29

0 14 -2 120.204 12.7837 30

2 14 0 115.267 12.3729 28

-2 0 14 121.208 13.2994 25

0 2 -14 101.514 8.77388 27

2 14 0 117.826 11.5276 26

0 -2 14 103.280 11.7562 25

0 2 14 98.2897 11.9106 25

-14 2 0 88.8830 11.3285 14

2 0 -14 85.1378 11.5430 12

0 -2 -14 112.215 12.7457 12

0 2 -14 116.226 13.0083 12

0 14 -2 108.259 11.8595 22

2 14 0 108.416 10.2358 23

0 14 -2 94.7794 10.6855 23

-2 14 0 123.128 11.2896 23

0 14 2 90.4791 8.80684 23

-14 2 0 106.326 12.1220 21

2 14 0 112.564 12.3274 19

0 14 -2 114.227 11.0638 20

0 14 -2 100.256 10.5876 19

-2 14 0 107.530 12.0025 22

-2 14 0 102.807 10.3337 19

0 14 2 92.9562 11.2374 19

-14 0 -2 125.129 12.7048 14

2 14 0 115.717 11.9494 16

0 14 2 126.989 10.8949 16

-2 0 -14 136.037 11.2891 15

0 14 -2 95.1251 10.4656 16

14 2 0 95.4443 10.2027 18

-14 0 2 106.107 11.4869 14

-2 14 0 115.523 9.71661 16

-14 -2 0 110.446 11.9446 14

-2 14 2 661.349 25.7002 9

-2 -2 -14 640.208 30.3765 8

-14 2 2 658.629 31.4615 10

-14 -2 2 687.712 29.1839 10

-14 2 -2 627.384 30.6481 10

-14 -2 -2 669.796 29.4818 10

-2 -2 -14 670.161 31.5143 7

-14 2 2 652.708 31.4339 6

-14 -2 -2 654.415 31.1663 6

-14 2 -2 594.639 29.8907 6

2 14 -2 658.717 29.7200 30

-2 14 -2 623.026 29.1657 30

2 14 2 668.005 29.1346 30

-2 14 2 667.103 30.0038 30

2 14 2 649.597 24.8584 29

-2 14 2 673.411 28.4632 29

2 2 -14 675.698 24.7210 27

2 14 2 639.154 29.4802 28

-2 -2 14 645.187 29.9654 25

-2 2 14 686.203 30.6344 25

2 14 2 706.495 29.4184 26

-2 14 2 670.015 29.9216 26

-2 14 2 711.890 31.0119 13

2 -2 -14 702.594 31.7470 12

2 2 -14 634.165 30.4927 12

2 14 -2 667.524 27.7090 23

2 2 -14 646.466 23.9371 22

-2 14 -2 657.585 28.6421 23

-2 14 2 670.647 25.0813 23

-2 14 -2 716.316 30.1683 22

2 14 -2 659.640 28.8595 19

2 14 -2 723.371 25.8353 20

2 14 2 618.818 30.1112 19

-2 14 -2 742.111 29.6203 20

-2 14 -2 602.742 23.6498 19

-14 2 2 637.580 28.9505 21

-2 14 2 691.927 28.6824 19

-2 2 -14 672.093 27.6315 15

-2 -2 -14 658.029 24.2641 15

-14 2 2 651.883 29.2650 14

-14 -2 2 703.953 28.8519 14

14 2 -2 629.409 26.1853 18

2 14 -2 708.085 29.8803 16

-4 0 -14-4.31999 5.41518 8

-4 14 0 1.05290 3.18500 9

-14 0 4 3.97007 5.12083 10

0 14 4 0.70753 2.66071 9

-14 -4 0-2.07846 4.13157 10

-14 0 -4-1.38622 5.21294 10

-4 0 -14-1.35665 5.39352 7

-14 -4 0-1.34018 4.73407 6

-14 4 0-1.36749 4.66677 6

-14 0 -4 1.47956 5.39783 6

4 14 0 2.62027 4.30839 28

4 14 0 2.36144 4.69408 30

-4 14 0-1.26802 4.32731 30

0 14 4 2.20421 4.38153 29

0 14 4-1.25490 5.11858 30

-4 0 14 1.37585 5.32397 25

0 4 -14 3.33093 3.56242 27

0 14 4 1.25318 4.84928 26

4 14 0 1.00681 3.43589 26

0 -4 14 1.23035 4.89140 25

0 4 14-1.24513 5.56347 25

-14 0 4-1.12447 4.22864 14

-14 -4 0 3.47526 4.09203 14

0 14 4-2.40098 4.64539 13

-4 14 0 2.56304 4.21429 13

4 0 -14-1.45586 4.78761 12

0 14 -4-1.22290 4.86178 23

-4 14 0-1.06572 4.34694 23

0 4 -14-0.92999 3.79332 22

4 14 0 0.85979 3.67816 23

-4 14 0 3.95748 4.96076 22

0 14 -4 2.13707 4.77442 22

0 14 -4 5.52180 4.50456 20

4 14 0 1.42590 5.36216 19

0 14 -4-0.85239 2.90892 19

0 14 4 1.37553 4.52344 19

-14 4 0 1.32542 5.40624 21

-4 0 -14 0.86597 3.44277 15

4 14 0 1.29842 4.58658 16

14 4 0-2.11312 3.33820 18

-4 -2 -14 158.995 15.2843 8

-4 14 2 154.895 13.3037 9

-2 -4 -14 169.811 14.9060 8

-4 14 -2 140.771 12.6097 9

-14 4 2 185.666 16.8054 10

-14 -2 4 195.086 15.2009 10

-14 2 -4 168.333 15.6110 10

-2 -4 -14 178.657 16.1581 7

-14 2 4 171.633 15.7021 10

-14 -2 -4 203.778 16.3349 10

-14 -4 2 187.032 13.7977 10

-14 -4 -2 178.818 14.2896 10

-2 14 4 149.772 12.0395 9

-14 -4 2 161.567 15.1281 6

-14 4 2 160.528 15.1998 6

-14 -4 -2 193.693 15.8405 6

-14 4 -2 142.327 14.1082 6

-14 -2 -4 182.139 16.4756 6

-14 2 -4 179.366 16.2018 6

2 14 -4 158.408 14.7351 30

4 14 -2 172.669 14.5969 30

-2 14 -4 166.734 14.4956 30

4 14 2 166.529 13.8884 30

-4 14 -2 179.003 15.0401 30

2 14 4 157.917 12.9108 29

2 14 4 149.399 13.7314 30

-4 14 2 173.811 15.0916 30

-2 14 4 155.416 14.6738 30

-2 14 4 167.467 14.6050 29

2 4 -14 174.183 13.1061 27

4 14 2 181.626 11.3546 29

4 14 2 171.638 14.7574 28

-2 -4 14 153.223 14.1321 25

-2 4 14 179.043 15.4563 25

-4 -2 14 174.927 15.7350 25

-4 2 14 160.377 14.8315 25

4 14 2 150.450 13.0570 26

-2 14 4 199.248 16.0259 26

4 14 -2 143.614 11.7670 26

2 -4 14 175.567 14.6653 25

2 4 14 170.554 14.7428 25

4 -2 -14 165.253 15.5002 12

4 2 -14 167.282 15.5728 12

-2 14 4 179.829 15.2239 13

2 -4 -14 167.497 14.7007 12

2 4 -14 183.104 15.5648 12

2 14 -4 159.632 12.6143 22

4 14 -2 195.564 14.5038 23

2 14 -4 163.800 14.4000 23

-2 14 -4 191.398 15.7225 23

-2 4 -14 179.316 14.5640 22

-4 14 -2 160.208 14.1145 23

-4 14 2 175.839 12.9798 23

-2 14 -4 170.261 14.5286 22

-4 14 -2 172.826 15.3526 22

4 14 -2 163.935 14.9755 19

2 14 -4 156.031 13.4847 19

2 14 -4 172.697 13.1997 20

4 14 2 161.785 15.5662 19

2 14 4 164.831 15.7098 19

-14 4 2 197.476 16.0319 21

-14 2 4 151.282 13.4659 21

14 2 -4 142.190 13.1011 18

-2 14 -4 182.777 15.7318 20

4 14 -2 188.084 15.9750 16

-2 4 -14 201.185 15.2959 15

-14 -2 4 165.565 13.2042 14

14 4 -2 168.326 14.3391 18

14 4 2 189.858 14.3822 18

4 14 -2 186.312 14.3912 18

-14 4 -2 197.939 15.8125 14

-14 2 -4 162.977 14.6611 14

-14 -4 2 145.800 12.5272 14

-4 -2 -14 144.783 10.6376 15

-4 2 -14 145.189 12.4052 15

2 14 -4 192.670 15.6977 16

-4 -4 -14-1.36329 5.27535 8

-4 14 4 2.19589 4.24858 9

-14 4 4 6.12854 6.84589 10

-14 -4 4 0.97499 4.35646 10

-14 -4 -4-1.16802 4.64359 10

-4 -4 -14-1.50159 5.47819 7

-14 -4 -4-1.36497 5.42658 6

-14 4 -4 1.40512 4.25048 6

4 14 -4-1.26872 4.00851 28

4 14 4-1.21443 4.14442 28

-4 4 14 2.27691 3.17222 29

-4 14 -4-1.22760 4.61647 30

4 14 4 1.05766 4.72584 30

4 14 4 3.34379 3.96176 29

-4 14 4-1.35202 4.77592 29

-4 -4 14-2.61511 5.19833 25

-4 4 14 1.32380 4.97823 25

4 4 -14 1.09857 4.48095 27

4 14 4-1.16951 4.26670 26

-14 -4 4-1.83836 3.84184 14

-14 4 -4-1.23370 4.63940 14

14 4 -4-4.30539 5.99830 12

14 -4 -4-1.46896 5.99172 12

-4 14 4 1.32487 5.26717 13

4 -4 -14 4.01293 6.22091 12

4 4 -14-1.38245 5.19877 12

-4 14 -4 6.39347 5.71347 24

-4 14 -4-2.57933 4.70505 23

-4 14 4 5.11390 3.46229 23

-4 4 -14 1.30052 5.03247 22

4 14 -4 1.21447 4.43072 23

-4 14 -4-1.31659 5.63234 22

4 14 -4 2.56337 5.35697 19

-4 4 -14 0.87556 3.99287 20

4 14 -4 1.68687 3.76865 20

-4 14 -4 2.32467 3.31498 21

-4 14 -4 1.35033 5.07799 20

-14 4 4 2.44391 5.22750 21

-4 4 -14-1.14844 4.56577 15

4 14 -4 1.39588 5.69365 16

14 4 -4-1.31845 5.24165 18

4 14 -4 0.99931 4.64744 18

-6 14 0 223.759 16.7596 9

-14 6 0 219.991 13.6406 9

-14 0 -6 245.868 19.0706 10

-6 0 -14 225.381 17.6559 7

-14 6 0 231.840 18.4667 10

-6 0 -14 254.503 19.5659 8

-14 -6 0 220.643 16.7003 6

-14 6 0 209.684 16.6283 6

-14 0 -6 248.005 19.4296 6

6 14 0 241.890 16.3822 30

0 14 6 227.343 16.7422 29

0 14 6 232.136 17.0561 30

6 14 0 213.834 17.3428 28

-6 14 0 237.370 17.2208 30

0 -6 14 285.695 18.1081 25

0 6 14 248.035 17.0901 25

-6 0 14 221.462 17.8295 25

0 14 6 242.780 17.5639 26

6 14 0 243.338 15.0397 26

0 6 -14 202.335 14.7568 27

6 0 -14 239.273 18.8519 12

0 14 6 234.873 16.7889 13

-6 14 0 226.251 17.3211 13

14 0 -6 231.729 19.1971 12

-14 6 0 229.999 13.7924 13

6 14 0 236.816 14.1897 23

0 14 -6 221.723 17.4144 23

-6 14 0 234.542 16.4151 23

0 14 -6 219.417 15.4604 22

0 6 -14 226.412 14.5291 22

6 14 0 244.653 19.5565 19

0 14 -6 229.813 17.2124 20

-14 6 0 250.417 18.3110 21

0 6 -14 234.649 17.5413 15

6 14 0 210.668 17.5620 16

14 6 0 216.564 16.8824 18

6 14 0 242.965 18.1316 18

-6 0 -14 219.844 13.6031 15

-6 2 -14 612.594 30.6116 8

-6 14 2 612.442 28.1901 9

-14 6 2 588.976 23.1639 9

-2 -6 -14 591.842 26.7974 8

-6 14 -2 572.187 27.4114 9

-14 -2 6 593.798 27.2545 10

-14 6 2 554.270 29.5696 10

-2 -6 -14 562.025 29.3702 7

-14 6 -2 605.015 30.0348 10

-6 2 -14 591.117 27.7956 7

-14 2 -6 578.565 29.9599 10

-14 -6 -2 608.740 24.1825 10

-14 -2 -6 600.070 29.3882 10

-6 -2 -14 591.882 30.0470 7

-6 -2 -14 587.024 30.4645 8

-14 -6 2 556.200 26.9708 6

-14 6 2 566.663 27.3989 6

-14 -6 -2 582.925 27.3345 6

-14 6 -2 633.489 28.6250 6

-14 -2 -6 569.596 29.9354 6

-14 2 -6 495.537 28.2920 6

-6 14 2 573.771 27.9382 30

-2 14 -6 539.979 27.3872 30

6 14 2 592.355 25.2772 30

2 14 6 590.077 26.4309 29

-6 14 -2 642.231 28.0732 30

-2 14 6 632.004 29.3909 29

2 14 6 626.338 27.5486 30

-2 14 6 615.411 29.4936 30

6 14 2 597.276 28.9185 28

2 6 14 561.482 26.4272 25

-14 6 -2 577.159 22.3735 24

-2 -6 14 580.272 27.1513 25

-2 6 14 581.357 26.8533 25

2 6 -14 641.107 27.4720 27

-6 -2 14 562.080 29.1309 25

-6 2 14 549.480 28.7057 25

2 14 6 656.075 29.3713 26

6 14 2 601.603 25.9711 26

-2 14 6 609.835 28.5282 26

6 14 -2 598.244 22.6800 26

2 -6 14 609.801 27.2504 25

6 -2 -14 670.701 31.9085 12

6 2 -14 585.358 30.2679 12

-6 14 -2 563.041 26.7881 13

-2 14 6 607.187 28.2206 13

-6 14 2 537.602 27.6398 13

14 2 -6 578.816 30.8209 12

14 -2 -6 619.444 31.7289 12

2 -6 -14 593.272 27.1252 12

2 6 -14 613.151 28.1992 12

-2 14 -6 648.235 27.8015 24

6 14 -2 570.663 25.4387 23

2 6 -14 592.152 22.3694 23

2 14 -6 542.841 27.7960 23

-6 2 -14 615.323 30.2938 22

-2 14 -6 625.597 29.4611 23

-2 14 -6 628.324 28.1408 22

-6 14 -2 663.916 29.4682 23

-2 6 -14 649.450 27.5851 22

-6 14 2 646.048 26.1897 23

-14 2 -6 620.045 22.3637 22

2 14 -6 577.888 23.6466 22

6 14 -2 662.943 31.7357 19

2 14 -6 578.814 24.8946 19

2 14 -6 693.028 28.4364 20

-2 14 -6 639.316 30.1275 20

-6 14 -2 590.322 26.2266 21

-14 6 2 543.030 28.2339 21

-14 6 -2 532.753 27.9809 21

-14 2 6 642.670 26.2525 21

14 6 2 578.031 24.4623 19

6 14 -2 566.928 27.9518 18

14 6 -2 593.202 29.1689 18

-14 -6 2 604.704 24.9144 14

-14 2 -6 654.518 29.3384 14

14 6 2 584.375 27.1646 18

-2 14 -6 574.125 21.9351 15

-6 2 -14 628.982 25.8621 15

-14 6 -2 622.098 28.1902 14

-2 6 -14 598.287 28.3996 15

-4 -6 -14 31.1479 7.81246 8

-6 14 4 37.4507 7.99156 9

-14 4 -6 39.4337 7.84708 8

-14 6 4 32.8441 6.06615 9

-6 4 -14 39.6499 9.05978 8

-14 6 4 37.1590 9.38540 10

-14 -4 6 40.8023 7.16067 10

-14 6 -4 34.7127 8.86868 10

-14 4 -6 31.6460 9.34029 10

-14 -4 -6 45.8138 9.05360 10

-14 -6 -4 34.8478 6.84330 10

-6 -4 -14 41.5219 9.29093 8

-14 -6 -4 28.3821 7.31750 6

-14 6 -4 24.1839 7.63508 6

-14 -4 -6 30.7277 7.66578 6

-14 4 -6 30.2964 8.44571 6

-6 -4 -14 39.2581 9.62558 7

-4 -6 -14 31.8624 9.30152 7

-14 -6 4 29.2365 7.79933 6

-14 6 4 30.3575 7.82366 6

6 14 -4 43.9224 8.59768 28

6 14 4 40.9831 8.34422 28

4 14 -6 26.5750 7.09354 28

-4 14 -6 39.5972 8.49740 30

-6 14 -4 29.0255 7.22352 30

-4 6 14 27.1881 6.42558 29

6 14 4 36.3757 6.59997 30

4 14 6 36.6624 7.42060 29

6 14 4 27.1757 5.39819 29

4 14 6 50.2157 7.95287 30

-6 14 4 38.8434 8.21595 30

-4 14 6 45.7882 8.78726 30

4 6 -14 31.8911 7.52743 27

-4 -6 14 30.9592 7.54701 25

-4 6 14 26.4646 7.21835 25

-6 4 14 28.5303 7.85873 25

-6 -4 14 24.0808 7.92935 25

6 14 4 33.6118 7.24943 26

4 -6 14 28.5608 7.46418 25

4 6 14 40.1505 8.25922 25

-4 14 6 43.4644 8.18752 26

14 4 -6 23.3224 7.88705 12

14 -4 -6 29.6060 8.55903 12

14 6 -4 25.6361 8.20455 12

14 -6 -4 33.4781 7.98663 12

-14 6 -4 31.2036 7.55026 14

-14 4 -6 37.1925 8.23206 14

-4 14 6 33.1073 7.84958 13

-6 14 4 45.2568 9.21029 13

4 -6 -14 36.0372 7.92224 12

4 6 -14 24.0913 7.69344 12

6 -4 -14 38.9252 8.98480 12

6 4 -14 35.9646 9.10924 12

-4 6 -14 31.0379 7.84598 22

-4 14 -6 25.6402 7.50964 23

-14 4 -6 28.5333 5.94606 22

-6 14 -4 29.0726 7.35478 23

-4 14 -6 48.4672 8.95462 24

-6 14 4 32.6052 7.01307 23

-6 14 -4 40.6332 9.09671 24

-6 4 -14 32.9216 8.77717 22

4 6 -14 33.5784 6.61229 23

6 14 -4 30.3165 7.60510 23

4 14 -6 42.8877 9.00175 23

-14 6 -4 30.2816 8.25319 21

-6 14 -4 30.5521 8.51686 22

6 14 -4 33.2804 8.77371 19

4 14 -6 21.2868 7.09710 19

-14 6 -4 28.6593 5.91037 22

6 14 4 36.8372 9.25732 19

-4 14 -6 50.4906 9.32690 22

4 14 6 47.6856 10.4707 19

-4 6 -14 26.3330 7.52609 20

4 14 -6 32.1899 7.18962 20

-4 14 -6 41.1879 8.89998 20

-6 14 -4 26.6874 6.05947 21

-14 6 4 35.2944 8.53451 21

-14 4 6 33.2189 7.64723 21

-4 14 -6 31.4049 6.12369 15

14 6 -4 31.1968 9.30738 18

4 14 -6 19.0918 5.83380 18

6 14 -4 41.3878 8.61985 18

-6 4 -14 27.1610 7.02513 15

-4 6 -14 41.6689 8.08287 15

-14 6 -6 562.834 28.9440 10

-6 -6 -14 566.810 30.2700 7

-6 -6 -14 522.547 26.9909 8

-14 6 6 531.541 22.1719 9

-14 -6 -6 516.740 25.9635 6

-14 6 -6 560.796 27.2934 6

6 6 -14 587.848 27.7217 27

6 14 6 512.225 22.0210 29

-6 6 14 542.973 21.9948 29

-6 14 6 556.144 27.8152 30

-6 14 6 537.805 28.3641 29

6 14 -6 568.895 26.3003 28

6 14 6 526.758 24.7414 28

-6 14 -6 581.092 28.2704 24

-6 6 14 507.081 25.4159 25

-6 -6 14 600.337 27.0876 25

6 14 6 489.478 24.8890 26

6 -6 -14 598.613 27.4572 12

6 6 -14 532.785 26.7736 12

-6 14 6 598.091 28.8971 13

14 6 -6 552.515 26.9049 12

14 -6 -6 519.289 26.2025 12

-14 6 -6 509.718 22.6178 22

6 14 -6 546.496 27.2751 23

-6 14 -6 553.369 28.2350 22

-6 6 -14 554.339 28.1389 22

6 14 -6 561.496 22.9033 20

-6 6 -14 592.839 23.7607 20

-14 6 6 555.451 26.3445 21

6 14 6 518.623 28.9842 19

6 14 -6 546.781 27.5722 19

14 6 -6 600.365 30.6375 18

6 14 -6 508.964 24.9245 18

-6 6 -14 527.576 26.2618 15

-14 6 -6 533.752 24.2702 14

-14 8 0-0.98204 3.58275 9

-14 8 0 2.80794 5.43277 10

-14 0 -8 6.00274 6.12113 8

-14 0 -8-3.00203 4.93610 10

-14 0 -8 3.13487 5.34910 6

-8 0 -14 1.35815 5.10740 7

-14 -8 0-1.00329 3.54404 6

-14 8 0 2.03698 4.04913 6

0 14 8 2.63426 4.49490 29

-8 14 0 1.12011 4.68162 30

8 14 0-2.79158 5.24894 28

0 14 8-1.23776 4.51568 30

0 -8 14-1.95679 4.37167 25

0 8 14 0.96425 4.03020 25

-8 0 14 4.42603 6.31148 25

0 8 14-1.50671 3.43555 26

-14 0 8 3.01228 6.58804 25

0 14 8 1.25367 4.98409 26

8 14 0-0.76943 3.13842 26

8 0 -14-1.58211 5.94961 12

0 14 8 1.05911 4.31998 13

-8 14 0 2.50478 4.42396 13

14 0 -8-4.94100 6.88382 12

-14 8 0 0.81216 3.22882 13

-14 0 -8 0.77771 3.61684 22

-8 14 0 6.03014 5.27532 23

0 8 -14-1.72330 3.51457 22

0 8 -14-0.78552 3.36043 23

0 14 -8 0.98643 4.49847 22

-8 14 0 2.66203 5.94724 22

0 14 -8 2.73566 5.14380 20

-8 14 0 1.31214 4.63505 21

14 8 0 2.55960 4.52079 19

0 8 -14-1.29041 4.85267 15

14 8 0-1.90215 3.87932 16

8 14 0 2.97129 6.05978 16

0 14 -8 2.73245 3.17692 15

-8 0 -14 0.73504 2.99816 15

14 8 0 1.45109 5.29398 18

8 14 0-3.04814 5.38366 18

-14 2 -8 86.2275 11.6639 8

-8 2 -14 64.3378 10.9796 8

-14 8 2 60.5291 8.52773 9

-14 -2 -8 64.5135 11.9171 8

-14 8 2 70.9099 11.3375 10

-14 8 -2 68.0812 10.8184 10

-14 2 -8 73.4632 11.8200 10

-8 -2 -14 54.4752 10.6023 8

-14 -2 -8 71.3438 12.0551 10

-14 8 -2 72.0940 9.28852 6

-14 -2 -8 78.6567 11.9253 6

-14 2 -8 52.7065 10.4553 6

-8 -2 -14 87.1745 12.0857 7

-8 2 -14 60.1039 9.56467 7

-2 -8 -14 80.6620 11.3648 7

-14 -8 2 64.9878 9.00747 6

-14 8 2 53.4872 8.57526 6

-14 -8 -2 53.5571 8.17476 6

2 8 14 81.0144 8.76534 30

-2 8 14 56.1408 9.31781 29

2 14 8 75.8263 10.7048 29

-8 14 -2 67.5066 9.49383 30

8 14 2 85.1807 11.4292 28

-2 14 8 71.0963 10.9260 29

-8 14 2 61.1893 9.97783 30

2 14 8 76.6115 10.0997 30

-2 14 8 56.5011 9.49667 30

2 -8 14 61.4253 8.69871 25

2 8 14 61.1146 8.47995 25

-2 -8 14 66.2018 9.21048 25

-2 8 14 49.3541 8.22088 25

2 8 -14 57.9501 9.88638 27

-8 2 14 75.7506 11.5656 25

-8 -2 14 68.9622 10.9473 25

2 8 14 69.9895 9.02174 26

-14 2 8 73.7131 10.9861 25

-14 -2 8 68.7096 11.1371 25

2 14 8 71.9334 10.1675 26

8 14 2 77.2978 9.15321 26

-2 14 8 71.3688 10.1190 26

8 -2 -14 67.2233 11.2087 12

8 2 -14 78.3425 12.2657 12

14 8 -2 62.7255 9.07081 12

14 -8 -2 57.7569 8.89315 12

-14 2 -8 77.7359 10.4707 14

-8 14 -2 53.0136 9.50087 13

-2 14 8 69.1961 10.4366 13

-8 14 2 63.8675 10.5746 13

14 2 -8 68.6165 11.8814 12

14 -2 -8 77.1266 12.0525 12

-14 8 2 67.0298 9.19747 13

-2 8 -14 54.5112 6.99289 23

-14 8 -2 67.0965 8.32123 24

-8 14 -2 66.7602 9.86633 23

-8 2 -14 64.5378 11.0133 22

-8 14 2 60.6177 9.07004 23

-14 2 -8 60.1914 8.19617 22

8 14 -2 75.7677 9.33338 23

-2 14 -8 63.7763 9.26978 24

2 8 -14 57.9787 7.81448 23

2 14 -8 65.9622 11.0731 23

-2 8 -14 75.4118 9.74754 22

14 8 2 58.6512 8.98530 19

-2 14 -8 71.5863 10.0517 22

-8 14 -2 97.0511 12.3342 22

-2 8 -14 81.4375 11.2868 20

2 14 -8 61.9446 10.2499 20

-2 14 -8 73.9186 10.9869 20

-8 14 2 70.7654 11.5327 21

8 14 2 70.3480 11.5207 19

-8 14 -2 69.9425 10.2062 21

-14 8 2 61.2325 10.3748 21

-14 8 -2 59.5607 9.85522 21

14 8 -2 59.8707 8.46488 16

8 14 -2 82.9853 12.0697 16

-2 14 -8 63.5786 7.77837 15

2 8 -14 64.9064 10.3750 15

-8 2 -14 63.5030 8.51242 15

14 8 -2 72.6659 11.5287 18

8 14 -2 42.2514 9.83451 18

14 8 2 42.9543 9.52914 18

-14 8 4 3.88136 4.59871 9

-4 -8 -14 4.15318 4.82878 8

-8 4 -14 4.14354 5.49107 8

-14 4 -8 1.06645 4.34997 8

-14 8 4-2.97200 5.58820 10

-14 8 -4-6.58881 4.80758 10

-8 -4 -14-4.68550 6.37056 8

-14 4 -8 1.49862 5.95795 10

-14 -8 -4 2.92159 4.25983 6

-14 8 -4 2.01748 3.90344 6

-14 -4 -8 2.79355 4.93403 6

-14 4 -8 1.44830 4.94256 6

-4 -8 -14 1.43992 5.41493 7

-14 -8 4-2.04814 4.57579 6

-14 8 4 4.14973 4.23161 6

-8 14 -4 3.54827 4.04537 30

4 14 8 1.11700 4.55614 29

-4 8 14 1.07803 4.71549 29

4 14 8 0.89252 3.64053 30

-8 14 4 2.52814 4.75363 30

-4 14 8-1.40566 5.58839 30

8 14 -4-2.58604 4.41265 28

8 14 4 3.73987 5.21044 28

4 8 -14 3.93479 5.48200 27

-4 8 14-1.93393 3.84433 25

-4 -8 14 3.77326 3.94274 25

-8 4 14 1.37669 4.86308 25

-8 -4 14 2.70515 5.78630 25

4 14 8 3.77624 4.73361 26

8 14 4 6.16423 4.19057 26

-4 14 8 6.63848 4.94371 26

4 -8 14 0.97938 4.28394 25

4 8 14 1.87525 4.36061 25

8 -4 -14-4.24360 6.18736 12

8 4 -14-1.47014 5.36351 12

-14 4 -8 2.06015 3.75803 14

4 -8 -14 2.87356 4.27992 12

14 4 -8 1.45947 6.24360 12

4 8 -14-2.03701 4.15440 12

-4 14 8 1.26389 4.89074 13

14 -4 -8 1.47080 5.84736 12

14 8 -4 2.05709 4.69054 12

14 -8 -4 0.97522 4.62182 12

-4 14 -8 2.69436 6.01950 23

-14 8 -4 2.99937 4.46730 24

-8 14 -4 2.64487 5.39409 23

-14 4 -8 0.93335 3.40517 22

-4 14 -8 1.21898 4.71696 24

-8 4 -14 1.48465 6.05576 22

8 14 -4-2.36907 4.58368 23

-4 8 -14 1.24549 4.81956 22

4 8 -14 4.86655 4.52656 23

4 14 -8 2.79206 5.55011 23

-14 8 -4 1.28694 5.37897 21

8 14 -4-1.55628 5.85248 19

8 14 4 1.59269 6.16307 19

4 14 -8 5.14053 4.39825 19

-14 8 -4 1.66515 4.08935 22

-4 14 -8 1.30875 5.33826 22

4 14 -8-1.14479 4.42990 20

-4 8 -14-1.19839 5.00883 20

-4 14 -8 2.92444 5.49878 20

-8 14 -4 2.75834 3.65541 21

-14 8 4 2.71644 5.25576 21

-14 4 8-0.91660 3.73876 21

8 14 -4 1.46486 4.81724 16

-4 14 -8 0.93473 3.61706 15

-8 4 -14-1.08397 5.04121 15

14 8 -4-1.56890 5.15938 18

8 14 -4 2.76058 5.19068 18

4 8 -14 4.74383 4.83742 15

-4 8 -14 1.31673 5.23482 15

-14 8 6 92.3471 10.3279 9

-8 -6 -14 132.702 14.8205 7

-14 8 -6 131.945 13.0331 10

-14 6 -8 146.650 14.6912 10

-14 8 6 120.695 14.2304 10

-8 -6 -14 113.472 13.6245 8

-6 -8 -14 146.240 13.3631 8

-14 6 -8 103.146 12.4575 6

-6 -8 -14 119.861 14.1758 7

-14 -8 6 122.425 11.6628 6

-14 8 6 122.479 11.6132 6

-14 -8 -6 122.415 11.1032 6

-14 8 -6 107.797 11.2386 6

-14 -6 -8 124.211 12.7087 6

6 14 8 140.885 12.0928 29

-6 8 14 131.558 11.4232 29

8 6 -14 167.204 14.9297 27

-8 14 6 143.792 13.8331 30

-6 14 8 129.356 14.1373 29

-14 6 8 105.551 10.0374 30

8 14 -6 136.733 12.8147 28

8 14 6 106.938 11.2714 28

6 8 -14 113.255 12.5620 27

-8 14 -6 157.510 14.7151 24

-6 8 14 108.941 11.0153 25

-6 -8 14 147.264 12.0897 25

-8 6 14 122.467 12.7923 25

-8 -6 14 129.338 12.7671 25

8 14 6 128.539 12.1184 26

-6 14 -8 122.231 13.5985 24

-14 8 -6 149.597 12.9342 24

6 -8 14 116.232 10.9157 25

6 8 14 113.425 10.8997 25

8 -6 -14 133.770 13.2830 12

8 6 -14 137.789 13.8676 12

14 -6 -8 117.486 12.8201 12

14 6 -8 154.197 14.0653 12

14 -8 -6 110.739 10.8949 12

-6 14 8 154.301 14.7501 13

-8 14 6 126.922 13.7309 13

-6 8 14 121.451 11.1440 13

14 8 -6 113.405 11.6519 12

6 -8 -14 129.770 11.7483 12

6 8 -14 113.231 11.6268 12

-14 6 -8 100.509 10.6355 22

6 8 -14 132.748 12.3131 23

8 14 -6 144.637 13.7923 23

6 14 -8 115.521 12.7124 23

-14 8 -6 127.893 11.4634 22

-6 14 -8 125.748 13.3768 22

-6 14 -8 128.516 13.4951 23

-8 6 -14 157.453 15.3843 22

-6 8 -14 134.106 13.9062 22

6 14 -8 137.181 11.8786 20

-6 8 -14 124.579 11.8403 20

-14 8 6 138.413 13.4019 21

-14 6 8 113.724 11.1564 21

-8 14 6 91.4626 12.2184 21

6 14 8 122.989 14.4518 19

8 14 6 109.344 13.6351 19

8 14 -6 146.247 14.7779 19

6 14 -8 108.385 12.1342 19

14 6 -8 140.494 15.2930 18

14 8 -6 133.654 14.6792 18

6 14 -8 119.885 11.8663 18

8 14 -6 127.544 13.1653 18

-6 14 -8 115.958 11.8599 15

-8 6 -14 134.275 12.8117 15

-6 8 -14 132.167 13.4747 15

-14 6 -8 110.474 10.4633 14

-8 -8 -14 2.30104 4.57429 8

-14 8 8 3.56971 3.54830 9

-14 -8 -8-1.42265 5.35020 8

-8 -14 -8 0.87263 4.13592 7

-14 8 -8 2.24655 4.69512 10

-14 -8 -8 1.73343 3.87298 6

-14 8 -8 0.91759 3.64834 6

-8 -8 -14 1.46886 5.68408 7

-14 8 8 5.15160 3.85625 30

14 8 -8 0.79781 3.56513 28

8 14 8 3.78572 3.38345 29

8 14 -8 0.85016 3.71903 28

-8 14 8-1.26287 4.88704 30

-8 8 14 3.54527 4.50115 25

-8 -8 14 5.10409 4.17854 25

8 14 8 3.37298 3.97192 26

14 -8 -8 5.97974 4.12308 12

14 8 -8 12.9102 5.11627 12

-8 14 8 2.59524 4.73433 13

8 8 -14 4.65947 4.49780 12

-8 8 14 1.98913 4.15721 13

-8 14 -8 1.17537 4.79449 23

-8 8 -14 2.66701 5.43945 22

8 14 -8 5.09394 6.14630 23

-8 14 -8 5.14454 4.97705 24

-14 8 -8 4.92858 4.21717 22

8 14 8 6.70598 5.04389 19

-8 14 -8-1.31991 5.24771 22

-8 14 8 3.89351 5.02232 21

-8 8 -14 2.30175 3.89655 20

-14 8 8 6.03369 5.10694 21

8 14 -8-2.57442 5.25062 19

-8 8 -14 2.38871 5.22449 15

14 8 -8 6.12396 7.25591 18

8 14 -8 5.63642 5.63168 18

-10 14 0 6.81328 6.09036 9

-14 10 0 11.8803 5.21448 9

-14 0 -10 10.4195 6.22306 8

-14 10 0 3.60451 5.14207 10

-14 0 -10 6.61597 5.41784 7

-10 0 -14 7.80099 7.11652 8

-14 0 -10 6.15666 5.95770 6

-10 0 -14 10.1957 6.04175 7

0 10 14 14.0727 5.87221 30

0 10 14 9.22386 6.24657 29

10 14 0 12.3970 6.02690 28

-10 14 0 3.50353 3.83399 30

0 14 10 10.7022 5.97923 29

0 14 10 5.81586 5.51448 30

-14 0 10 4.42964 6.59911 25

0 10 14 8.78513 3.78780 26

0 14 10 9.28553 5.39994 26

-10 0 14 7.26089 5.92507 25

10 0 -14 10.9588 6.38735 12

14 0 -10 6.41930 6.54753 12

-10 14 0 2.27282 4.52028 13

-14 10 0 9.77120 4.75762 13

0 14 -10 4.05133 5.08050 23

-14 0 -10 8.97506 4.63292 22

0 10 -14 6.27146 4.24850 23

-10 0 -14 15.7077 6.51368 22

-10 14 0 2.42719 5.53633 23

14 10 0 6.81981 5.27996 19

0 14 -10 11.2135 4.97783 22

0 10 -14 10.0833 6.57063 20

10 14 0 4.82578 6.05095 19

0 14 -10 12.6122 6.26321 20

-10 14 0 1.31123 5.35035 21

14 10 0 13.8719 5.67677 16

10 14 0 18.7645 7.09106 16

0 14 -10 14.5417 4.57976 15

14 10 0 12.3061 7.29165 18

10 14 0 11.0163 6.88534 18

0 10 -14 5.96315 5.44075 15

-10 14 2 507.529 26.1937 9

-14 10 2 473.646 23.1825 9

-10 2 -14 469.594 22.8999 7

-14 10 -2 527.669 24.8165 10

-10 -2 -14 482.905 26.8225 7

-14 -2 -10 489.962 27.8458 8

-14 2 -10 539.664 27.0075 8

-14 10 2 504.880 25.4654 10

-10 -2 -14 498.264 28.5574 8

-10 2 -14 444.958 25.8695 8

-14 -2 -10 480.456 26.9362 6

-14 2 -10 520.389 28.0207 6

14 10 -2 458.538 24.6301 28

14 10 2 527.926 26.2014 28

-2 10 14 522.758 25.6724 29

2 14 10 518.337 25.6885 29

-10 14 2 499.966 22.8453 30

2 14 10 467.136 22.0684 30

10 14 2 510.005 26.4549 28

-2 14 10 513.758 25.9862 30

-2 10 14 522.682 24.9364 30

-14 10 -2 465.113 21.1918 24

2 10 14 487.498 22.1576 26

-10 2 14 491.563 26.5519 25

-10 -2 14 492.896 26.5209 25

2 14 10 474.171 24.1453 26

10 14 2 479.115 19.9763 26

-2 14 10 486.979 23.4108 26

-14 2 10 479.512 26.4807 25

-14 -2 10 506.066 27.0369 25

10 -2 -14 476.678 27.1780 12

10 2 -14 435.258 26.2868 12

14 -2 -10 467.068 27.3879 12

14 2 -10 450.493 26.8518 12

-10 14 -2 489.060 22.5061 13

-2 14 10 485.939 22.6268 13

-10 14 2 495.662 25.0888 13

-14 10 2 496.887 22.8442 13

-2 10 -14 460.046 22.1508 22

-2 14 -10 530.569 22.8564 24

10 14 -2 497.137 22.1629 23

2 10 -14 507.527 22.9826 23

2 14 -10 448.452 25.3135 23

-2 14 -10 488.279 23.2609 22

-2 14 -10 495.653 25.7979 23

-2 10 -14 453.537 20.2619 23

-10 2 -14 534.260 27.8274 22

-14 -2 -10 446.634 20.2609 22

-10 14 -2 494.568 25.3126 23

-14 2 -10 468.554 21.9061 22

-14 10 -2 495.217 20.4620 22

-10 14 -2 501.077 25.3347 22

14 10 2 475.459 24.6673 19

-2 10 -14 536.251 27.1314 20

2 14 -10 527.953 26.6321 20

-2 14 -10 526.310 27.3437 20

-10 14 2 457.039 25.4967 21

-10 14 -2 461.928 23.7226 21

-14 10 2 491.474 26.4947 21

-14 10 -2 517.306 26.3978 21

10 14 2 520.411 28.6264 19

14 10 -2 487.928 26.6907 19

10 14 -2 466.072 27.7237 19

10 14 -2 484.102 26.1971 16

14 10 -2 425.975 26.2357 18

10 14 -2 463.774 26.8149 18

-10 2 -14 483.061 20.8194 15

14 10 2 516.501 27.6091 18

-2 14 -10 447.634 20.8288 15

-2 10 -14 529.052 25.8177 15

2 10 -14 474.023 23.7217 15

-14 2 -10 529.730 23.7855 14

14 10 -2 472.636 22.5821 16

-10 14 4 167.606 14.9855 9

-10 4 -14 173.219 15.3867 8

-14 10 4 172.390 13.7289 9

-10 -4 -14 210.993 17.7585 7

-14 10 -4 169.976 13.7698 10

-14 10 4 151.167 14.5169 10

-14 -4 -10 214.107 18.0609 8

-4 -10 -14 157.680 14.5143 7

-14 4 -10 189.032 14.2543 8

-10 -4 -14 189.134 16.8538 8

-14 -4 -10 190.080 15.8494 6

-14 4 -10 156.084 15.4024 6

14 10 -4 165.957 14.3440 28

14 10 4 157.427 13.5531 28

4 14 10 176.169 14.6007 29

-4 10 14 178.748 14.8882 29

-4 14 10 179.790 16.0570 29

-4 14 10 176.881 15.4022 30

10 14 -4 164.523 14.6833 28

10 14 4 222.031 16.2586 28

-4 10 14 136.657 13.7049 30

-10 14 4 174.155 14.0291 30

-14 10 -4 178.122 13.6002 24

-10 14 -4 150.723 14.5441 24

4 10 -14 173.114 15.1177 27

14 10 4 156.683 10.8004 26

4 10 14 204.821 14.8670 26

-4 14 -10 189.961 14.4755 24

4 14 10 182.043 14.7354 26

10 14 4 153.797 11.9913 26

-10 4 14 148.912 14.7702 25

-10 -4 14 157.793 14.9329 25

-14 4 10 145.735 14.5708 25

-14 -4 10 160.976 14.7779 25

-4 10 -14 144.792 12.3416 24

10 -4 -14 169.022 15.5369 12

10 4 -14 172.676 15.9051 12

14 4 -10 183.583 16.4379 12

-4 14 10 175.307 14.0381 13

-10 14 4 188.548 15.4593 13

-14 10 4 132.256 12.9836 13

14 -4 -10 139.682 14.4074 12

-4 10 -14 168.432 14.0967 22

10 14 -4 170.586 14.0094 23

4 10 -14 146.578 12.7985 23

-4 14 -10 163.428 14.5084 22

-4 14 -10 195.852 15.7638 23

-14 10 -4 161.813 12.4022 22

-4 10 -14 139.054 10.3929 23

-10 14 -4 180.389 15.6511 22

-10 14 -4 139.523 14.2550 23

-14 4 -10 170.265 13.3016 22

4 14 -10 208.814 15.9700 20

-4 10 -14 161.759 15.3146 20

14 10 4 179.570 13.8973 19

-4 14 -10 152.153 15.3260 20

10 14 4 141.654 14.9740 19

-10 14 4 166.175 15.5652 21

-14 10 4 167.177 14.9316 21

-10 14 -4 161.279 12.6320 21

-14 10 -4 153.358 13.9877 21

14 10 -4 131.923 15.4180 18

10 14 -4 140.241 14.7723 18

-10 4 -14 176.463 13.5306 15

-4 14 -10 166.024 13.1392 15

-14 4 -10 153.434 11.9843 14

14 10 -4 179.744 13.1758 16

10 14 -4 184.326 15.6559 16

4 10 -14 156.095 12.9150 15

-10 14 6 451.275 23.6000 9

-6 -10 -14 443.303 23.9785 7

-14 10 6 455.188 21.5544 9

-14 10 -6 415.103 20.3677 10

-14 -6 -10 422.765 25.1342 8

-14 10 6 428.781 23.5855 10

-10 -6 -14 465.525 25.5754 8

-14 -6 -10 440.524 22.2765 6

-14 6 -10 462.901 23.2174 6

6 14 10 447.428 21.5815 29

14 10 -6 458.979 21.6071 28

14 10 6 457.500 21.1445 28

-10 14 6 463.087 22.7092 30

-6 10 14 427.577 21.0192 29

-6 14 10 483.848 25.1968 30

-6 14 10 438.487 24.2954 29

-6 10 14 430.688 23.4731 30

-14 6 10 384.596 18.6945 30

10 14 -6 417.094 21.4613 28

10 14 6 408.070 20.4610 28

6 14 10 459.176 23.0393 26

10 14 6 444.420 20.7586 26

-14 10 -6 415.481 21.5792 24

-10 6 14 424.694 22.1642 25

-10 -6 14 389.580 21.2010 25

-6 14 -10 428.356 22.5507 24

10 -6 -14 414.408 21.8727 12

10 6 -14 454.174 23.2186 12

14 -6 -10 443.609 22.6299 12

14 6 -10 478.859 23.3421 12

-6 14 10 487.239 23.6310 13

-6 10 14 464.729 20.3171 13

-14 10 6 449.668 23.1024 13

-14 6 -10 439.978 21.4237 22

-6 10 -14 442.414 23.2858 22

10 14 -6 464.973 23.4040 23

6 10 -14 453.266 21.9831 23

-6 14 -10 427.189 23.4465 22

-14 10 -6 414.993 20.4187 22

-10 14 -6 426.598 23.5547 22

-6 14 -10 457.846 22.7826 23

-10 14 -6 457.462 23.3909 23

6 14 -10 477.928 22.3487 20

-6 10 -14 442.233 22.1421 20

-6 14 -10 475.328 25.2565 20

-10 14 6 470.886 24.9344 21

-14 10 6 459.882 23.4099 21

10 14 6 501.684 25.6711 19

14 6 -10 443.345 25.7514 18

10 14 -6 422.143 24.7578 19

6 14 -10 379.271 20.1065 19

6 10 -14 423.996 21.0580 18

14 10 -6 445.311 25.7984 18

10 14 -6 444.786 24.5068 18

-6 14 -10 398.405 20.8109 15

-10 6 -14 449.098 22.0516 15

6 10 -14 384.139 19.3371 15

-10 14 8 11.1455 5.18568 9

-14 10 8 13.1736 4.87482 9

-14 -10 -8 12.4011 5.63400 8

-14 -8 -10 15.9540 6.23399 8

-14 10 8 5.74156 4.91486 10

-10 -8 -14 8.56609 5.52666 8

-10 -8 -14 5.26960 5.37573 7

-8 -10 -14 16.7079 6.15929 7

-14 8 10 7.98383 3.86305 30

-8 10 14 10.3190 5.53563 30

14 10 -8 9.03497 3.58909 28

8 14 10 12.4224 4.59179 29

10 14 -8 12.9661 4.26062 28

-10 14 8 10.1276 5.22754 30

-8 14 10 14.9579 5.93849 30

14 8 -10 2.71916 3.70025 27

10 8 -14 9.97940 5.15904 27

14 10 -8 9.29027 3.85915 27

8 10 -14 11.2566 5.13570 27

-10 8 14 10.5402 4.17967 25

10 14 8 8.34308 4.39601 26

14 8 -10 7.00623 4.20334 12

-8 14 10 19.6676 6.38298 13

-10 14 8 8.18605 4.77248 13

-8 10 14 12.9644 4.73228 13

-14 10 8 11.1500 5.93182 13

10 8 -14 6.27637 4.41368 12

-10 8 14 10.6476 4.83800 13

-14 10 -8 7.18917 4.77881 24

-8 14 -10 2.20778 4.27436 24

-10 14 -8 11.4508 5.42900 24

-8 14 -10 5.66067 4.39033 23

-10 14 -8 9.99599 4.91207 23

-8 10 -14 1.16544 4.87351 22

10 14 -8 8.83934 5.70282 23

8 10 -14 8.77837 4.95551 23

8 14 -10 4.59342 4.91504 23

10 14 -8 11.0601 5.93290 19

8 14 -10 3.99182 4.27200 19

-14 10 -8 6.30887 4.50500 22

-8 14 -10 15.1783 6.30188 22

10 14 8 5.41451 5.03855 19

8 14 -10 12.5917 4.43259 20

-8 14 10 15.6842 5.39697 21

-10 14 8 10.1287 5.13455 21

-14 8 -10 11.2510 5.34258 22

-14 10 8 9.44094 4.79674 21

-10 8 -14 1.02935 4.40621 15

-8 10 -14 6.61280 5.02845 15

8 10 -14 6.03007 4.49323 18

14 8 -10 6.77022 5.92475 18

14 10 -8 12.1163 5.76131 18

8 14 -10 6.99102 4.58120 18

10 14 -8 11.1199 6.08721 18

8 10 -14 6.80869 3.51627 15

-14 10 10 320.141 15.5711 9

-10 -14 -10 270.761 14.6943 7

-14 10 10 316.654 17.9252 10

-10 -10 -14 326.636 18.5560 7

-14 -10 -10 320.876 17.4459 8

-10 14 10 323.366 17.4059 9

-10 14 10 343.854 17.5106 30

-14 10 10 281.294 13.7210 30

-10 10 14 343.779 17.8489 30

-10 14 -10 328.839 18.1067 24

14 10 -10 312.047 15.0417 27

10 10 -14 342.783 17.9484 27

-14 10 -10 310.770 17.0494 24

10 14 10 364.237 17.3598 26

-10 10 -14 349.434 18.1856 24

-10 14 10 320.721 17.6570 13

-10 10 14 334.935 16.7262 13

-10 10 -14 339.783 18.4741 22

10 10 -14 322.888 16.7299 23

10 14 -10 369.027 18.7476 23

-14 10 -10 321.010 16.5180 22

-10 14 -10 308.181 15.5373 23

-10 14 10 323.962 16.8978 21

10 14 -10 306.512 17.2905 19

10 10 -14 309.922 17.4303 18

10 14 -10 315.349 16.6956 18

-14 0 -12-1.35637 4.94842 8

-14 12 0-2.40575 3.58316 10

-12 0 -14 2.80681 5.72434 8

-14 0 -12-0.95197 4.16407 7

-14 0 -12-2.79468 4.76864 6

-12 0 -14 1.04763 4.16500 7

14 12 0-1.21499 5.54077 28

12 14 0 3.73296 4.53965 28

0 12 14 1.21573 4.70439 29

0 14 12 1.93919 3.95491 30

0 12 14 2.66376 4.12944 30

-12 0 14 9.27156 5.66623 25

-14 0 12 1.32518 4.83463 25

0 12 14 0.77119 3.22330 26

0 14 12 2.86721 3.48682 26

12 0 -14-1.42233 5.94481 12

-14 0 -12 2.75247 3.92503 14

14 0 -12 1.44078 5.25638 12

-12 14 0 1.79085 4.61991 13

-14 12 0-0.72523 3.24051 13

0 14 -12 1.13594 4.39565 23

0 12 -14-0.89781 3.17150 23

-14 0 -12 0.89857 3.66521 22

-12 0 -14 5.86923 5.56316 22

14 12 0 5.16496 4.99657 19

0 14 -12 2.59780 5.02621 20

12 14 0 1.41397 4.82539 19

-12 14 0 1.19390 4.86983 21

-14 12 0-2.48634 4.81056 21

14 12 0 2.11314 4.20054 16

12 14 0 1.24980 5.92311 16

0 14 -12 2.24766 3.48440 15

14 12 0 4.33015 5.26587 18

0 12 -14-0.96269 3.92675 15

-12 2 -14 74.7272 10.7614 8

-12 14 2 55.3618 9.10922 9

-14 12 2 66.3228 9.31572 9

-14 -2 -12 53.8623 10.3926 8

-14 12 2 48.8794 7.36635 10

-14 2 -12 66.7242 9.95314 8

-14 -2 -12 64.0190 9.77888 7

-12 -2 -14 58.4541 9.86255 7

14 12 -2 61.8399 9.14964 28

14 12 2 66.4717 9.62696 28

2 12 14 49.0722 8.65603 29

2 14 12 63.1711 9.04827 29

12 14 -2 58.6311 9.25231 28

12 14 2 57.0729 9.13059 28

-2 12 14 50.8809 8.89270 29

-2 14 12 50.7742 8.95214 29

2 14 12 60.3853 7.64164 30

-2 14 12 62.0290 9.09358 30

-2 12 14 59.6415 8.80606 30

-12 2 14 54.0787 10.0856 25

-12 -2 14 69.7640 10.7149 25

-14 2 12 51.3937 9.35729 25

-14 -2 12 50.6712 9.51225 25

2 12 14 57.1704 8.00531 26

2 14 12 55.4579 8.28886 26

-2 14 12 42.2925 6.88330 26

12 -2 -14 54.1028 10.0740 12

12 2 -14 61.8124 10.1521 12

-14 2 -12 58.4814 7.31505 14

14 2 -12 62.0516 10.3450 12

-12 14 2 63.2333 9.21826 13

-14 12 2 60.2112 8.46081 13

14 -2 -12 53.8113 9.72013 12

2 14 -12 65.9281 9.60721 23

2 12 -14 61.9766 8.62567 23

-12 2 -14 61.0069 9.68968 22

-2 14 -12 55.5776 9.20146 23

-2 12 -14 38.7829 7.02680 23

-12 -2 -14 60.7328 9.12158 22

-14 2 -12 53.6375 8.29529 22

-14 -2 -12 49.1351 7.23654 22

12 14 -2 63.3549 7.55143 23

14 12 -2 54.9439 9.28419 19

-14 12 -2 48.4461 7.18966 22

-2 12 -14 63.3253 7.90272 22

-2 14 -12 52.4424 7.93348 22

-12 14 -2 65.8859 9.07108 22

2 12 -14 66.7498 10.6509 20

2 14 -12 72.2323 10.6423 20

-2 12 -14 58.0521 10.1730 20

-2 14 -12 70.5326 10.7703 20

14 12 2 64.5485 9.86349 19

12 14 -2 45.4250 8.84034 19

-12 14 2 53.7824 9.80013 21

12 14 2 48.3929 9.39297 19

-12 14 -2 65.9097 9.45303 21

-14 12 -2 62.2628 9.29132 21

14 12 -2 57.1145 8.81339 16

12 14 -2 58.3890 9.59143 16

12 14 2 53.9795 9.56538 16

-2 14 -12 66.1287 8.49439 15

2 14 -12 44.2183 6.25434 15

-2 12 -14 63.4478 8.66560 15

14 12 -2 71.2238 10.9950 18

2 12 -14 61.3821 8.33285 15

14 12 2 72.5340 9.82799 16

-14 4 -12 3.68914 4.45118 8

-12 4 -14 2.07386 3.78305 8

-12 14 4 1.14389 4.66583 9

-14 12 4 3.01149 3.88443 9

-14 -4 -12 6.84204 6.24042 8

-14 12 4 1.73960 3.27099 10

-12 -4 -14 1.36039 5.81975 8

-14 -4 -12 4.91709 5.93274 7

-12 -4 -14-5.13197 6.08044 7

-4 12 14 1.10510 4.39347 30

14 12 -4 1.04012 4.13516 28

14 12 4 4.06840 3.71070 28

4 14 12-1.06418 4.00194 29

12 14 -4 2.12400 4.33181 28

-12 14 4 0.69841 2.77666 30

12 14 4 4.12863 4.51482 28

-4 12 14-2.16960 5.04505 29

-4 14 12 5.90199 4.16970 29

-4 14 12 2.29561 4.91031 30

-12 4 14 9.17119 5.72698 25

-12 -4 14-1.12400 4.46861 25

4 12 14 4.52936 3.87534 26

-14 4 12 2.27773 5.29650 25

4 14 12-4.00592 4.08497 26

-14 -4 12-2.23009 4.43301 25

12 14 4 1.20113 2.68352 26

12 -4 -14 1.17799 4.16121 12

12 4 -14-1.20433 4.91236 12

14 -4 -12 1.18899 4.84978 12

14 4 -12 1.18988 4.47465 12

-4 14 12 0.78824 3.59469 13

-12 14 4 7.50950 5.17752 13

-14 12 4 1.96118 4.28927 13

-4 14 -12-0.95505 4.08571 23

-4 12 -14 0.68530 3.12524 23

-12 -4 -14 4.95596 4.95163 22

-14 4 -12-0.94395 3.33448 22

-4 12 -14-2.20759 3.73689 24

-4 14 -12-0.81038 3.98035 24

-14 12 -4 0.89187 4.22685 24

-12 4 -14 1.16241 5.30102 22

-14 -4 -12 3.53274 3.34855 22

12 14 -4 4.40853 3.85673 23

4 12 -14 1.92928 4.12676 23

4 14 -12 1.12705 4.23837 23

-14 12 -4 0.93745 4.10055 21

14 12 -4 1.32407 5.12361 19

12 14 -4 1.37354 4.68744 19

-4 12 -14-0.94696 4.05111 22

-4 14 -12 0.96816 3.94906 22

14 12 4 6.83594 4.62820 19

-14 12 -4 0.79599 3.84167 22

-12 14 -4 1.01164 4.02193 22

12 14 4-2.40367 5.25700 19

4 12 -14-1.19396 4.74675 20

4 14 -12 1.10037 6.10478 20

-4 12 -14-3.47767 5.28648 20

-12 14 4-1.21581 4.95921 21

-14 12 4 2.38859 4.21878 21

-12 14 -4-0.81701 4.01289 21

12 14 -4 1.09528 4.46757 16

-4 14 -12 6.17788 4.48180 15

-4 12 -14 3.11549 4.12869 15

14 12 -4 1.35757 5.25323 18

12 14 -4 5.26829 5.50488 18

4 12 -14 2.18463 2.97034 15

-14 -12 -6 19.6654 5.59945 8

-12 14 6 28.9164 6.66892 9

-14 12 6 18.0888 5.29277 9

-14 -6 -12 32.5892 7.71349 8

-14 12 6 14.0152 4.94228 10

-12 -6 -14 31.5202 8.32289 8

-14 -6 -12 29.9267 7.33183 7

-6 -12 -14 14.5955 4.90185 7

-6 14 12 12.4652 5.45300 29

-6 12 14 28.7540 6.52453 30

-14 6 12 19.6147 5.18599 30

12 14 -6 16.8556 5.28053 28

12 14 6 17.3533 4.78405 28

6 12 14 25.2942 6.33539 29

14 12 -6 20.7923 5.26629 28

6 14 12 13.5227 4.73547 29

14 12 6 14.8796 4.80336 28

-12 14 6 19.9211 4.95343 30

-6 14 12 30.4580 6.95312 30

-6 12 14 16.3039 5.23576 29

12 6 -14 16.1990 5.84992 27

-12 6 14 15.2942 5.13543 25

-12 -6 14 19.3033 5.43816 25

6 12 14 19.4454 5.47804 26

14 12 6 15.2794 3.91138 26

6 14 12 13.2023 5.24263 26

12 14 6 18.4525 4.66808 26

14 -6 -12 16.0442 5.34164 12

14 6 -12 22.1642 5.78438 12

-6 14 12 18.9037 5.25825 13

-6 12 14 24.8735 5.24955 13

-12 14 6 10.4656 5.65715 13

-14 12 6 26.5315 6.47169 13

12 -6 -14 19.4577 5.59896 12

12 6 -14 20.3326 6.20353 12

-12 -6 -14 25.2159 5.74679 22

-6 12 -14 16.1970 5.12856 24

-6 14 -12 15.2104 4.63021 23

-6 14 -12 17.2670 5.35129 24

-14 12 -6 25.0113 5.65458 24

-12 14 -6 23.9969 6.39255 24

-12 6 -14 20.4315 6.44027 22

12 14 -6 26.5957 6.37914 23

-14 6 -12 17.0407 5.18458 22

6 12 -14 20.1366 5.48464 23

6 14 -12 21.8363 6.51059 23

-6 12 -14 16.7000 5.53344 22

-6 14 -12 18.8874 5.74415 22

-12 14 -6 24.2402 6.32451 22

6 12 -14 14.4778 5.59021 20

6 14 -12 14.4530 5.28620 20

12 14 6 15.7863 5.84169 19

-6 14 12 21.3106 5.72317 21

-6 12 -14 20.1665 5.61843 20

-6 14 -12 21.7369 7.01750 20

-12 14 6 27.1630 6.35433 21

-14 12 6 9.31413 5.09426 21

14 12 -6 14.8713 6.20012 19

-14 12 -6 20.6502 5.18424 22

-6 14 -12 20.0750 5.63922 15

-6 12 -14 16.8878 5.59544 15

14 6 -12 23.7774 7.22674 18

12 14 -6 17.5329 6.22541 18

6 12 -14 23.0085 4.42567 15

-12 14 8 2.60980 3.45882 9

-14 12 8 1.50672 3.57065 9

-14 -12 -8 3.47932 3.23654 8

-14 12 8-0.70920 3.36140 10

-14 -8 -12 7.56695 4.48293 8

-12 -8 -14 9.65780 4.66952 8

-12 -8 -14 5.23276 4.67642 7

-8 -12 -14 1.57309 3.72791 7

-8 12 14 1.85095 4.04839 30

-14 8 12 4.88719 3.15222 30

-12 8 14-0.80787 3.53400 30

8 12 14-0.81299 3.55642 29

8 14 12 4.70405 3.30096 29

-12 14 8 6.54860 3.32580 30

14 8 -12-0.78337 3.03165 27

12 8 -14 4.32816 4.02600 27

8 12 14 6.33653 3.75407 26

14 12 8 4.62242 2.88683 26

8 14 12 2.45146 3.24900 26

12 14 8 3.87319 3.17094 26

-8 14 12 8.50536 4.73100 13

-8 12 14-0.65787 2.93984 13

-14 12 8 0.89022 3.44507 13

-12 8 14 9.03541 4.30391 13

-14 8 12 0.90749 3.70182 13

-8 12 -14 2.35509 3.72072 24

-14 12 -8 0.81767 3.41784 24

-8 14 -12 0.81886 3.25579 24

-12 14 -8-4.43476 4.12516 24

-8 14 -12 0.60734 3.27746 23

-12 8 -14 0.92796 4.05928 22

12 14 -8 5.92520 4.08543 23

8 12 -14 7.21768 3.93921 23

8 14 -12 0.89765 3.56899 23

12 14 -8 4.08431 4.05966 19

-12 14 -8 0.85843 3.32208 22

-14 8 -12 2.35930 3.36465 22

-8 12 -14 2.70611 3.49079 22

-8 14 -12 5.44025 4.05161 22

-14 12 -8 1.45242 3.31207 22

8 12 -14 4.79925 3.79107 20

8 14 -12 2.54553 3.07165 20

-8 14 12 2.67910 2.99303 21

-12 14 8 4.31401 4.08928 21

-14 12 8 5.50822 3.99622 21

12 8 -14 3.10047 4.52084 18

14 8 -12 2.12779 3.75839 18

12 14 -8 3.78048 4.13432 18

12 8 -14 3.78364 2.36314 15

-10 14 12 43.4940 6.22456 9

-12 14 10 54.6607 6.63685 9

-14 -12 -10 39.3103 6.51137 7

-14 -10 -12 53.9607 7.39651 7

-12 -10 -14 63.4667 7.68494 7

-12 10 14 58.7468 6.80023 30

-10 14 12 52.0438 6.50166 30

-10 12 14 48.5023 6.82363 30

12 10 -14 53.2735 6.54885 27

14 10 12 44.3628 6.05789 26

12 10 14 43.9061 6.09849 26

10 12 14 48.4146 6.18475 26

12 14 10 41.4986 5.34157 26

-10 14 12 36.8172 5.62065 13

-12 14 10 59.3161 7.02036 13

-12 10 14 52.6920 6.50469 13

-14 10 12 48.8360 6.69975 13

-12 10 -14 45.4783 6.44194 24

-14 10 -12 56.8249 7.06333 24

-10 12 -14 51.2146 6.48048 24

-14 12 -10 43.7380 6.10627 24

-10 14 -12 49.0701 6.45941 24

14 12 -10 58.6311 7.14282 23

12 10 -14 51.0730 6.13957 23

12 14 -10 46.3965 6.49545 23

10 12 -14 45.1885 6.14246 23

12 14 -10 38.9661 6.05848 19

-12 10 -14 45.0312 6.76792 22

-10 12 -14 40.3903 6.36915 22

-10 14 -12 50.0732 6.89760 22

-12 14 -10 49.0146 6.56964 22

14 12 -10 63.6196 7.89338 19

12 10 -14 57.7106 7.19969 18

14 10 -12 49.8913 7.38167 18

14 12 -10 56.8357 7.46442 18

-14 0 -14 128.468 10.0043 7

-14 0 -14 124.173 12.1697 8

0 14 14 153.221 12.4573 29

0 14 14 139.374 10.1091 30

14 14 0 131.112 11.8870 28

0 14 14 115.876 9.07829 26

-14 0 14 96.8779 10.9021 25

14 0 -14 135.578 12.9227 12

0 14 -14 117.549 10.1821 23

-14 0 -14 124.350 10.2247 22

14 14 0 130.683 12.0474 19

0 14 -14 154.455 12.9692 20

-14 14 0 128.060 11.6987 21

0 14 -14 126.736 9.48336 15

14 14 0 126.449 11.2004 16

-14 2 -14 325.682 17.9118 8

-14 -2 -14 361.499 20.2701 8

-14 -2 -14 327.849 17.2061 7

-2 14 14 362.074 18.9389 29

-2 14 14 344.850 16.8988 30

14 14 -2 368.511 18.5964 28

14 14 2 326.395 17.8075 28

2 14 14 352.299 16.1875 26

-14 2 14 328.684 18.5785 25

-14 -2 14 330.343 18.4015 25

14 -2 -14 318.742 18.8033 12

14 2 -14 323.663 18.9564 12

-14 -2 -14 305.747 14.8990 14

-14 14 2 353.725 16.2694 13

2 14 -14 301.955 15.9918 23

-2 14 -14 334.341 15.7510 23

-14 -2 -14 327.353 15.5312 22

-14 2 -14 303.469 16.1189 22

14 14 -2 330.979 19.1041 19

2 14 -14 319.053 18.2473 20

14 14 2 380.168 19.0514 19

-14 14 2 334.298 18.2888 21

-14 14 -2 366.850 17.6900 21

14 14 2 347.956 17.9497 16

14 14 -2 324.400 19.2854 18

-2 14 -14 358.960 16.1315 15

2 14 -14 327.370 13.8895 15

14 14 -2 338.283 17.3303 16

-14 14 4 6.49851 3.92046 9

-14 4 -14 1.33963 3.05468 8

-14 -4 -14 2.06939 4.22047 8

-14 -4 -14 0.90418 3.95506 7

4 14 14-1.67470 3.49989 29

14 14 -4 1.58114 3.22473 28

-4 14 14 2.48743 3.70485 30

14 14 4 3.06102 2.87787 28

-4 14 14-0.86584 4.02681 29

4 14 14-2.12557 3.35795 26

14 -4 -14 2.63958 4.01252 12

14 4 -14-0.88146 3.68426 12

-14 14 4 5.11580 3.82920 13

4 14 -14 6.10323 3.47918 23

-4 14 -14 1.10378 2.75712 23

-14 4 -14 1.50885 3.15329 22

-14 -4 -14 0.56606 2.73203 22

14 14 -4 1.73302 2.47139 23

-4 14 -14 1.28899 3.16562 22

14 14 -4 5.14575 4.78628 19

4 14 -14 0.86786 3.16627 20

-4 14 -14 4.56073 4.55677 20

14 14 4 0.77653 3.24568 19

-14 14 4-1.83852 4.02102 21

14 14 4 3.36766 3.99011 16

-4 14 -14 0.69102 2.81869 15

-14 14 6 299.426 14.5893 9

-14 -6 -14 285.871 15.8846 7

-14 -6 -14 303.540 16.2958 8

6 14 14 275.491 14.1074 29

-6 14 14 284.435 15.0796 30

14 6 -14 276.590 14.3848 27

14 14 -6 247.017 12.6434 28

6 14 14 274.331 13.7047 26

14 6 -14 251.012 13.2182 12

-14 14 6 298.539 14.7979 13

-14 6 -14 275.833 14.1257 22

14 14 -6 250.344 12.8807 23

6 14 -14 274.302 14.1484 23

-6 14 -14 261.016 13.8533 22

14 14 -6 266.254 15.9766 19

6 14 -14 276.530 14.3270 20

-14 14 6 266.841 14.6413 21

14 14 6 267.378 14.4490 16

-6 14 -14 289.880 14.0709 15

14 14 -6 273.041 15.7504 18

14 6 -14 262.651 15.8343 18

-1 15 1 4.67520 3.95729 9

-15 1 1 5.77365 6.31390 10

-15 -1 1-1.31089 4.78279 10

-15 1 -1 8.71732 6.21565 10

-15 -1 -1 6.70178 5.32901 10

-15 -1 1 6.19656 6.31900 6

-15 -1 -1 3.06181 5.58542 6

1 15 -1 2.72389 5.69267 30

-1 15 -1 8.21162 6.24153 30

1 15 1 8.05518 6.47955 30

-1 15 1 1.37093 5.59214 30

-1 -1 15 1.39447 5.08768 25

1 1 -15 3.19048 3.24083 27

1 -1 15 1.36926 5.58533 25

1 15 1 6.20003 4.93008 26

-15 1 1 1.32764 4.53107 14

-15 1 -1 2.73254 4.98482 14

-15 -1 -1 4.03799 5.35143 14

-15 -1 1 2.53293 4.62073 14

1 -1 -15 1.47538 5.70934 12

1 15 -1 1.04551 4.04605 23

1 15 1 5.09828 3.46632 23

-1 15 -1 4.39475 4.90945 23

-1 15 1 2.75105 3.64611 23

-1 15 -1 2.95414 4.40024 19

1 15 -1 4.75588 4.72719 19

-1 15 1 2.29926 4.57081 19

1 15 1 3.94771 5.23180 19

-1 15 -1-0.88350 3.86492 16

-1 15 1 2.44452 3.93296 16

1 15 -1 6.68042 5.07779 16

1 15 1 1.05690 3.97489 16

-1 1 -15 2.11269 4.19997 15

-1 15 3 239.946 14.3320 9

-3 15 1 280.235 16.7292 9

-3 -1 -15 308.301 21.2227 8

-3 1 -15 264.354 20.7673 8

-3 15 -1 257.575 16.2821 9

-15 1 3 267.111 19.7597 10

-15 3 1 308.796 21.8587 10

-15 3 -1 274.301 20.5610 10

-15 -1 3 261.402 18.4845 10

-15 -3 1 261.199 17.4430 10

-15 -3 -1 304.550 18.9618 10

-15 -1 -3 275.936 19.6715 10

-15 1 -3 250.260 19.5361 10

-15 -3 1 245.779 19.0607 6

-15 3 1 236.319 18.7533 6

-15 -3 -1 265.658 19.9655 6

-15 3 -1 287.023 20.4865 6

-15 -1 -3 267.858 20.6501 6

1 15 -3 245.435 19.0351 30

3 15 -1 253.513 18.5269 30

3 15 1 276.290 18.8615 30

-3 15 -1 261.533 19.0228 30

1 15 3 265.243 18.8809 30

-1 15 3 276.167 19.5025 30

3 1 -15 243.817 14.2535 27

1 15 3 252.717 16.1538 29

-1 15 3 265.763 17.3812 29

3 15 1 246.440 18.3966 28

1 -3 15 255.570 18.6951 25

1 3 15 266.587 18.9559 25

-1 -3 15 284.558 19.5346 25

-1 3 15 272.169 19.4414 25

-3 -1 15 269.602 20.0946 25

1 3 -15 262.661 14.8442 27

3 15 1 289.298 18.2270 26

-1 15 3 291.644 19.5220 26

3 15 -1 277.293 17.3048 26

-15 -3 -1 273.535 18.9636 14

-15 -1 -3 289.489 19.8304 14

-1 15 3 276.712 19.6595 13

1 -3 -15 280.962 19.7908 12

1 3 -15 268.623 19.7827 12

3 -1 -15 273.237 20.3179 12

-3 15 -1 267.292 19.7443 22

3 15 -1 283.840 16.9153 23

1 15 -3 269.997 18.1370 23

3 15 1 276.686 14.9682 23

-1 15 -3 239.745 17.5902 23

-1 3 -15 257.932 17.3031 22

1 3 -15 260.330 15.5410 22

-3 15 -1 245.942 17.2438 23

-3 15 1 262.647 16.3472 23

-1 15 -3 297.224 19.4254 22

3 15 -1 274.126 19.2867 19

1 15 -3 260.237 16.7786 19

1 15 -3 268.402 16.4725 20

3 15 1 259.669 19.6269 19

-1 15 -3 271.687 17.7395 20

-1 15 -3 266.622 15.1748 19

1 15 3 282.904 19.9500 19

-15 3 1 270.117 19.3324 21

-1 15 3 280.879 19.2021 19

3 15 -1 257.968 18.6551 16

-1 15 3 268.292 14.6396 16

3 15 1 271.764 18.6915 16

-1 3 -15 241.175 17.1134 15

1 15 3 260.228 16.3237 16

-15 -1 3 247.149 17.3297 14

15 1 -3 252.512 15.7895 18

15 3 -1 248.070 16.3497 18

-15 -3 1 237.066 17.1520 14

-15 1 3 267.657 18.4355 14

1 15 -3 304.549 19.0763 16

-3 1 -15 264.596 16.4525 15

-3 -1 -15 244.482 14.7960 15

-15 3 1 301.221 19.9212 14

-3 15 3-0.99583 4.06187 9

-3 -3 -15 1.42139 5.94087 8

-15 3 3-1.55023 4.89795 10

-15 -3 3 2.23587 4.67253 10

-15 3 -3 3.07930 6.73461 10

-15 -3 -3 1.25651 5.12518 10

-3 -3 -15 6.11131 6.23184 7

-15 -3 3 4.54663 4.98387 6

-15 3 3-6.11428 6.23486 6

-15 -3 -3-1.47360 5.70221 6

-15 3 -3 1.50164 4.74441 6

3 15 -3 4.07458 5.94090 30

-3 15 -3 2.67983 5.98699 30

3 15 3-1.21682 5.20550 30

3 15 3-2.44661 4.46294 29

-3 -3 15 1.39103 4.39494 25

-3 3 15 2.81620 5.29523 25

3 3 -15 0.94961 3.96901 27

3 -3 15 1.31600 5.23191 25

3 15 3 3.70277 4.90692 26

3 3 15 2.70991 5.52672 25

-15 -3 3 2.15922 4.51236 14

-15 3 -3-1.35256 5.23383 14

-3 15 3 1.37629 5.17561 13

3 -3 -15-1.43739 4.90531 12

3 3 -15-2.93650 6.56044 12

-3 15 -3 1.27444 4.79258 23

-3 15 3 4.68229 3.69841 23

-3 3 -15-3.79750 4.76023 22

3 15 -3-1.16799 4.26114 23

-15 3 3-1.28140 5.35574 21

-3 15 -3-5.30490 5.80106 22

3 15 3-1.54012 4.65884 19

3 15 -3 1.25259 4.56980 19

3 15 -3 1.61597 3.29569 20

3 15 -3 4.03299 5.61879 16

-3 3 -15-1.13966 3.88925 15

15 3 -3 1.11257 4.18389 18

-5 -1 -15 322.196 22.3164 8

-5 15 1 296.164 18.4832 9

-5 15 -1 280.848 18.2584 9

-15 -1 5 321.027 20.1514 10

-15 -5 1 277.728 16.6743 10

-15 -5 -1 288.863 17.1296 10

-15 1 -5 343.538 22.3624 10

-15 -1 -5 298.436 20.6172 10

-5 -1 -15 332.512 21.8601 7

-15 1 5 315.120 21.2839 10

-1 15 5 315.131 16.2850 9

-15 -5 1 301.479 20.0042 6

-15 5 1 312.467 20.5949 6

-15 -5 -1 297.232 20.0198 6

-15 5 -1 327.962 21.1305 6

-15 -1 -5 315.315 22.2638 6

1 15 -5 283.336 20.2562 30

-1 15 -5 351.901 21.7066 30

5 15 -1 320.463 20.1200 30

5 15 1 283.269 18.3110 30

-5 15 -1 288.072 19.5480 30

-5 15 1 313.251 20.8165 30

1 15 5 356.111 21.2996 30

1 15 5 328.850 19.2244 29

-1 15 5 326.607 21.0961 30

-1 15 5 293.811 19.2319 29

5 15 1 265.932 19.5898 28

1 -5 15 298.930 19.5999 25

1 5 15 327.889 20.2478 25

-1 -5 15 344.628 21.1254 25

-1 5 15 316.831 20.2304 25

-5 -1 15 341.268 22.0933 25

1 5 -15 281.121 16.9019 27

1 15 5 303.775 19.8422 26

5 15 1 314.461 18.4966 26

-1 15 5 298.525 20.2760 26

5 15 -1 261.866 16.1479 26

5 -1 -15 314.162 22.0845 12

-15 -5 -1 314.341 19.6200 14

-1 15 5 287.582 19.5516 13

-5 15 1 296.225 20.4438 13

15 -1 -5 296.835 22.4118 12

-5 15 -1 303.149 20.8883 22

1 15 -5 311.268 17.7900 22

5 15 -1 290.413 16.9863 23

1 15 -5 336.422 21.2326 23

-1 15 -5 342.795 21.2858 23

-5 15 -1 310.891 19.4567 23

-1 5 -15 304.534 17.9758 22

-5 15 1 324.295 18.5763 23

-1 15 -5 297.368 18.6744 22

5 15 -1 308.553 21.7208 19

1 15 -5 302.152 18.6619 20

1 15 -5 292.154 16.9686 19

5 15 1 276.445 21.1211 19

-1 15 -5 294.428 19.5460 20

-15 5 1 284.089 20.6799 21

-15 5 -1 298.475 20.7633 21

1 15 5 367.755 23.5242 19

5 15 -1 322.929 21.4682 16

5 15 1 300.590 20.7125 16

-15 -5 1 276.210 17.9336 14

1 5 -15 328.581 20.6535 15

15 1 -5 244.714 16.8638 18

15 5 -1 335.830 19.5390 18

-15 1 -5 322.984 20.8918 14

15 5 1 321.951 18.9576 18

-5 -1 -15 296.383 15.3801 15

-5 1 -15 318.719 17.5690 15

-15 5 -1 319.454 20.9641 14

-1 5 -15 299.509 19.7988 15

-5 -3 -15 1.50139 6.12523 8

-15 3 -5 6.62833 4.93762 8

-3 15 5 4.02682 4.68343 9

-5 15 3 11.6510 5.31463 9

-3 -5 -15 10.3441 5.77875 8

-5 3 -15 1.50093 6.27451 8

-15 3 5 1.56917 4.95930 10

-15 -3 5 9.79366 5.34616 10

-15 5 -3 18.2645 7.34668 10

-15 -5 -3 10.5217 4.70289 10

-15 -3 -5 6.54526 5.34087 10

-15 -3 -5 5.93951 5.90455 6

-15 3 -5 9.12504 6.93661 6

-3 -5 -15 4.60396 6.41542 7

-15 -5 3 9.56614 6.47775 6

-15 5 3 4.23686 5.90408 6

-15 -5 -3 1.34283 5.19760 6

-15 5 -3 5.53549 5.50308 6

5 15 -3 5.42118 5.09812 28

5 15 3 6.58215 5.37096 28

-3 5 15 7.10731 4.51317 29

-3 15 -5 9.16018 5.20390 30

-5 15 -3 5.03559 5.62633 30

5 15 3 5.29202 4.63120 30

3 15 5 6.88141 5.01817 30

3 15 5 9.66105 4.98605 29

-5 15 3 17.9823 7.02547 30

-3 15 5 11.2323 6.65517 30

-3 15 5 12.2299 6.32085 29

-3 -5 15 5.20206 5.56491 25

-3 5 15 11.7742 5.84676 25

3 5 -15 8.73039 5.54315 27

-5 -3 15 8.47615 6.31337 25

-5 3 15 15.7395 7.26720 25

5 15 3 9.22099 5.46392 26

3 -5 15 6.18522 6.77071 25

3 5 15 3.78527 4.88399 25

-3 15 5 9.19065 5.35677 26

15 3 -5 6.17402 6.75258 12

15 -3 -5 7.88164 7.47160 12

-15 5 -3 5.15317 5.12320 14

-15 -5 3 6.59909 4.46948 14

-15 3 -5 11.6686 5.79436 14

15 5 -3 15.5026 7.38508 12

15 -5 -3 18.7583 7.78688 12

-3 15 5 4.05235 5.37158 13

-5 15 3-1.39632 5.55255 13

3 -5 -15 20.8128 7.31460 12

3 5 -15 4.08914 4.48405 12

5 -3 -15 4.39121 5.66536 12

5 3 -15 9.04180 6.87336 12

-3 15 -5 4.05995 4.62000 23

-5 15 -3 2.60355 5.44228 23

-15 5 -3 4.98193 3.49776 24

-5 15 3 9.52737 5.05971 23

-5 3 -15 12.6796 7.03905 22

-3 5 -15 6.15109 5.49821 22

5 15 -3 3.38976 5.45460 23

3 15 -5 10.3861 5.92176 23

-15 3 5 6.91631 5.56460 21

-3 15 -5 6.50077 6.16295 22

-5 15 -3 2.79511 5.70179 22

-3 5 -15 5.10680 4.65934 20

5 15 -3 11.3155 6.32114 19

3 15 -5 3.36310 4.45846 19

3 15 -5 4.83406 4.58358 20

-5 15 -3 7.42933 4.64085 21

-3 15 -5 6.79591 6.19952 20

-15 5 3 4.03087 4.90342 21

-3 5 -15 6.24842 4.70108 15

5 15 -3 10.1809 6.22311 16

15 3 -5 5.05911 5.16033 18

15 5 -3 9.09424 5.68407 18

5 15 -3 10.0643 5.10109 18

15 5 3 5.45148 4.97362 18

-5 3 -15 13.1546 5.74486 15

-5 15 5 6.95036 5.28616 9

-15 5 5 14.2964 6.79822 10

-15 5 -5 10.5281 7.76225 10

-5 -5 -15 9.69533 5.92832 8

-15 -5 -5 8.82377 5.03360 10

-15 -5 -5 22.7244 7.41853 6

-15 5 -5 5.52456 5.63680 6

-5 -5 -15 18.9847 8.03628 7

5 15 5 5.89796 5.27416 28

-5 15 -5 14.1707 6.28318 30

5 15 5 10.4729 5.35642 30

5 15 5 13.4990 4.69752 29

5 15 -5 14.9463 6.22511 28

5 5 -15 8.28986 5.51096 27

-5 5 15 11.7538 6.63480 25

-5 -5 15 11.6455 6.67879 25

5 15 5 12.1231 5.74865 26

15 5 -5 9.67581 5.64136 12

15 -5 -5 4.22704 6.92323 12

-15 5 -5 14.2192 5.72196 14

-5 15 5 20.7635 7.14445 13

5 -5 -15 11.8774 7.12361 12

5 5 -15 19.2605 7.42584 12

-5 15 -5 5.39385 5.50359 23

-5 15 -5 14.7818 6.93590 24

5 15 -5 10.1571 6.02020 23

-5 5 -15 16.4158 6.60499 22

5 15 5 3.22722 6.41797 19

-5 15 -5 16.5395 6.41284 22

5 15 -5 5.19730 4.43831 19

-5 5 -15 11.6193 4.48244 20

-15 5 5 7.33137 5.68586 21

15 5 -5 8.53087 5.94574 18

5 15 -5 15.0286 5.85438 18

-5 5 -15 12.0665 6.22858 15

-7 -1 -15 3.16325 6.12029 8

-15 1 -7 2.75190 5.32443 8

-7 15 1-1.29101 5.76857 9

-7 15 -1 2.58804 5.00741 9

-15 7 1 3.26542 3.79672 9

-15 1 7 1.45001 5.91451 10

-15 -1 7 1.27421 5.06585 10

-15 7 1 2.97920 5.43455 10

-15 7 -1 1.45798 6.23729 10

-15 1 -7 4.56588 5.55261 10

-15 -1 -7 1.45753 5.14870 10

-15 -1 -7 1.55966 4.92785 6

-7 -1 -15 2.90110 5.91672 7

-7 1 -15-1.30670 5.05647 7

-15 -7 1 2.29351 4.79311 6

-15 7 1 1.18339 4.18036 6

-15 -7 -1 4.57270 5.10803 6

-15 7 -1 5.88338 4.91816 6

7 15 1-1.38872 5.22245 28

7 15 1 5.74767 4.54004 30

-7 15 -1 1.18496 4.45622 30

-7 15 1 1.25548 5.24752 30

1 15 7 3.62594 4.40958 29

1 15 7 3.63247 5.41029 30

-1 15 7 1.31871 5.76828 29

-1 15 7 1.32444 5.12511 30

1 -7 15-2.24045 5.10870 25

1 7 15 7.68191 5.29645 25

-1 -7 15 2.24097 4.79350 25

-1 7 15 5.54133 4.95205 25

1 7 -15 6.60770 4.37839 27

-7 -1 15-1.47181 5.02285 25

1 15 7 2.60828 5.45090 26

7 15 1 6.46204 4.45542 26

-1 15 7 10.3529 5.53625 26

7 15 -1-0.74353 2.71280 26

-15 -7 1-0.95364 3.98597 14

-15 1 -7 2.62644 4.63896 14

-15 -7 -1 1.12339 4.58229 14

-7 15 -1 10.0574 5.84678 13

-1 15 7-1.19486 4.62372 13

-7 15 1-1.33908 5.32377 13

-15 7 1 0.83449 3.31776 13

15 -1 -7-1.63942 6.68708 12

7 -1 -15 3.11176 6.80569 12

-1 15 -7-1.38957 5.06964 23

-7 1 -15-1.50093 5.64443 22

-7 15 -1 2.46680 4.20928 23

-7 15 1 2.21212 4.28010 23

-1 7 -15 1.92325 4.01936 22

7 15 -1 0.87923 3.58643 23

1 15 -7 5.53831 5.35782 23

15 7 1 4.13155 4.21315 19

-1 15 -7-4.42232 5.23971 22

1 15 -7 2.72466 4.22393 22

7 15 -1 1.58789 5.01702 19

1 15 -7 1.24136 4.52893 20

-1 15 -7 3.99687 4.86065 20

-7 15 1-1.35152 4.93080 21

-7 15 -1 2.39199 5.34404 21

-15 7 1 2.85996 5.68512 21

-1 7 -15 1.32533 5.26910 15

7 15 1 1.46834 5.18689 16

15 7 -1 6.77747 6.05670 18

-7 1 -15 2.58041 3.84340 15

15 7 1 7.61624 6.54932 18

7 15 -1 1.38170 4.71537 18

-3 -7 -15 173.266 16.4473 7

-7 -3 -15 135.416 14.9462 7

-7 15 3 166.980 14.6009 9

-7 3 -15 202.135 17.1782 8

-15 7 3 159.130 11.7941 9

-3 -7 -15 191.683 14.6615 8

-15 -3 7 145.579 12.9027 10

-15 7 3 169.662 16.4094 10

-15 7 -3 173.447 15.6468 10

-15 -3 -7 160.133 14.9673 10

-15 3 -7 171.828 14.6481 8

-7 -3 -15 193.100 17.6166 8

-15 -7 3 159.283 13.8298 6

-15 7 3 131.294 13.4596 6

-15 -7 -3 168.608 14.1991 6

-15 7 -3 134.385 13.0671 6

-15 -3 -7 178.126 16.4916 6

-15 3 -7 153.253 15.5719 6

7 15 3 165.361 11.9620 30

-3 7 15 148.901 12.8202 29

-7 15 -3 182.571 14.2565 30

3 15 7 169.645 13.7965 29

3 15 7 163.328 13.4197 30

-7 15 3 174.958 15.1624 30

-3 15 7 183.004 15.9692 30

-3 15 7 156.227 14.9337 29

7 15 -3 210.412 16.7683 28

7 15 3 166.881 15.1573 28

3 -7 15 155.944 13.6869 25

3 7 15 156.997 13.6272 25

3 7 -15 161.691 14.2218 27

-3 -7 15 159.749 13.7657 25

-3 7 15 115.906 12.3981 25

-7 3 15 153.638 15.2751 25

-7 -3 15 192.074 16.7086 25

-15 7 -3 149.374 11.4061 24

3 15 7 178.232 15.1432 26

7 15 3 159.423 13.4754 26

-3 15 7 146.401 13.8863 26

7 -3 -15 177.326 16.2244 12

7 3 -15 154.232 15.6074 12

15 7 -3 120.035 12.8677 12

-3 15 7 155.720 14.2919 13

15 3 -7 164.137 16.3443 12

15 -3 -7 148.566 15.7105 12

15 -7 -3 150.676 13.8629 12

7 15 -3 162.930 13.4217 23

3 7 -15 140.236 10.6363 23

3 15 -7 143.334 14.6787 23

-3 15 -7 170.697 15.1142 23

-7 3 -15 173.458 16.0697 22

-3 15 -7 146.464 13.9341 22

-7 15 -3 148.283 14.3595 23

-7 15 3 154.632 12.4209 23

-3 7 -15 148.543 13.5098 22

7 15 -3 145.644 15.7796 19

-3 7 -15 165.695 14.0972 20

3 15 -7 137.394 11.9242 19

3 15 -7 149.088 13.2343 20

-3 15 -7 184.879 16.3964 20

-7 15 3 141.915 15.1646 21

7 15 3 201.076 18.0861 19

-7 15 -3 142.878 12.3428 21

-15 7 -3 145.006 14.8667 21

-15 7 3 123.562 13.6563 21

3 7 -15 178.005 15.1982 15

-15 3 -7 143.954 13.4472 14

15 7 -3 142.816 15.0290 18

-3 15 -7 136.421 11.0239 15

7 15 -3 159.667 14.7909 18

-7 3 -15 137.419 12.6480 15

-3 7 -15 167.732 14.9002 15

-7 15 5 233.285 16.9373 9

-15 7 5 228.354 13.8305 9

-5 -7 -15 213.909 16.1899 8

-15 5 7 213.708 18.4521 10

-15 7 5 242.719 19.5511 10

-15 7 -5 263.323 18.7373 10

-15 5 -7 243.327 19.0298 10

-5 -7 -15 211.004 18.3805 7

-7 -5 -15 239.175 19.6472 7

-7 -5 -15 255.930 18.8973 8

-15 -7 5 208.577 15.7998 6

-15 7 5 216.957 16.2626 6

-15 -7 -5 235.678 16.2234 6

-15 7 -5 221.129 16.2270 6

-15 -5 -7 248.851 17.9622 6

-15 5 -7 235.150 18.0143 6

-7 15 -5 222.794 14.8156 30

5 15 7 218.420 14.4179 29

-5 7 15 196.245 13.4901 29

-7 15 5 239.250 17.7249 30

7 5 -15 267.676 18.0224 27

7 15 -5 212.754 16.6720 28

7 15 5 195.120 15.2836 28

-15 7 -5 213.446 14.3687 24

5 7 -15 253.720 17.5333 27

-5 7 15 236.385 16.4773 25

-5 -7 15 234.314 16.4164 25

-7 5 15 220.088 17.1842 25

-7 -5 15 215.922 17.0084 25

7 15 5 214.441 15.4988 26

5 -7 15 207.658 15.3562 25

5 7 15 250.680 16.5701 25

7 -5 -15 215.800 17.3780 12

7 5 -15 234.798 18.4370 12

-5 15 7 235.053 18.0438 13

15 5 -7 220.474 17.4569 12

15 -5 -7 280.022 19.3085 12

-7 15 5 247.590 18.5041 13

15 7 -5 221.164 16.1425 12

15 -7 -5 255.837 17.0197 12

5 -7 -15 240.004 16.3441 12

5 7 -15 207.974 16.4040 12

-15 5 -7 200.204 13.0006 22

-7 15 -5 255.388 18.4014 24

5 7 -15 232.431 14.2571 23

7 15 -5 240.650 17.2869 23

5 15 -7 241.070 17.6884 23

-5 15 -7 252.055 17.6969 24

-5 15 -7 245.682 17.9889 22

-7 15 -5 256.378 18.1978 23

-7 15 -5 259.903 18.7529 22

-7 5 -15 246.006 18.7441 22

-5 7 -15 253.583 18.1519 22

5 15 -7 202.790 15.9428 19

-5 7 -15 211.581 14.8439 20

5 15 -7 254.690 15.6881 20

-5 15 -7 280.853 19.9802 20

7 15 5 260.077 20.2657 19

-15 7 5 213.210 16.9378 21

-15 5 7 220.716 15.6379 21

5 15 7 207.686 18.1938 19

7 15 -5 225.511 17.8742 19

-15 5 -7 228.594 15.8277 14

15 5 -7 228.894 19.0771 18

15 7 -5 226.869 18.7625 18

5 15 -7 184.114 13.8587 18

7 15 -5 233.718 17.0205 18

-7 5 -15 246.859 17.1137 15

-5 7 -15 244.986 17.7506 15

7 15 -5 236.541 18.6467 16

-7 -7 -15 6.00231 5.25099 8

-7 15 7-1.17504 3.86414 9

-15 7 7 2.93491 3.47734 9

-15 7 7-1.45979 4.98175 10

-15 7 -7-1.25980 5.00849 10

-15 -7 -7 3.06415 4.26901 6

-15 7 -7-1.06384 3.63053 6

-7 -7 -15-1.49216 5.77405 7

-15 -7 7 1.08368 4.84214 6

-15 7 7-2.19886 4.25434 6

7 15 7 0.69955 3.25339 29

-7 15 7 1.27874 4.66522 30

7 7 -15 3.67506 5.35841 27

7 15 7-1.12292 3.96667 26

7 -7 15-0.94364 4.30335 25

7 7 15 1.92182 4.38209 25

-7 7 15 2.03751 4.73789 25

-7 -7 15 1.99682 4.36718 25

15 -7 -7-1.03207 4.41519 12

15 7 -7-2.12032 4.63728 12

-7 15 7 3.92613 4.77455 13

7 -7 -15 2.02756 4.71477 12

7 7 -15 5.38116 5.00520 12

-7 7 15 0.84958 4.10029 13

-7 15 -7 2.55715 5.34396 24

-7 7 -15 1.31279 5.86581 22

7 7 -15 2.56821 3.40343 23

7 15 -7-1.24183 4.38669 23

7 15 -7 2.48451 4.53210 19

-15 7 -7 0.78448 3.57751 22

-7 15 -7 1.31866 5.24248 22

7 15 7 2.89390 5.59910 19

-7 7 -15 3.58431 2.99625 20

-15 7 7 1.04259 5.12081 21

15 7 -7 2.96541 5.73745 18

-7 7 -15 2.34076 5.00687 15

7 15 -7-3.03456 4.51969 18

-9 -1 -15 9.35371 7.11582 8

-9 1 -15 17.9843 7.61666 8

-15 -1 -9 13.4221 6.24063 8

-15 9 1 16.6047 5.32991 9

-15 1 -9 26.9133 7.86464 8

-15 -1 9 16.6075 6.22268 10

-15 9 1 17.2198 6.51303 10

-15 9 -1 11.4820 6.16463 10

-15 1 -9 11.7773 6.72040 10

-15 -1 -9 22.3830 7.94165 6

-15 1 -9 18.5864 5.82899 7

-9 -1 -15 19.0881 7.67174 7

-9 1 -15 10.6589 5.92418 7

1 9 15 20.7534 5.41557 30

-1 9 15 17.4401 5.62227 30

-1 9 15 16.7935 5.79716 29

-9 15 -1 17.7953 5.47821 30

-9 15 1 16.7508 5.89400 30

1 15 9 18.6073 6.70039 29

-1 15 9 15.8010 6.90571 29

1 15 9 11.0166 5.51183 30

-1 15 9 19.8935 6.00830 30

9 15 1 29.6520 7.58399 28

1 9 15 16.4458 4.97288 26

-9 -1 15 18.4657 7.77913 25

1 15 9 13.4015 5.56421 26

9 15 1 15.0628 4.44740 26

-1 15 9 23.5490 6.96638 26

9 -1 -15 18.2376 7.20910 12

-15 1 -9 15.1519 6.89599 14

-15 -9 -1 14.9994 5.34826 14

-1 15 9 16.0868 5.87961 13

-9 15 -1 20.0621 6.51618 13

15 -1 -9 29.7144 8.91301 12

-9 15 1 17.1937 6.72764 13

-15 9 1 8.13673 4.46308 13

1 9 -15 22.3168 5.30779 23

-1 9 -15 15.4133 4.76031 22

-9 15 -1 22.9284 6.61085 23

-9 15 1 15.5181 5.98865 23

-15 1 -9 20.6189 5.03225 22

15 9 -1 10.1913 5.70021 19

15 9 1 23.7511 7.22726 19

-1 15 -9 18.5064 5.76531 22

-9 15 -1 12.8909 6.96235 22

-1 9 -15 20.2225 7.87926 20

1 15 -9 23.0986 7.02905 20

-1 15 -9 16.1376 6.61215 20

-9 15 1 22.4168 6.91557 21

-9 15 -1 17.7100 6.28639 21

9 15 1 28.4834 8.54385 19

-15 9 1 26.4925 7.74162 21

-15 9 -1 26.0464 8.01170 21

1 9 -15 19.4236 5.97031 15

15 9 -1 17.6943 5.27727 16

15 9 1 12.8502 5.36903 16

-1 15 -9 12.5683 3.92173 15

9 15 1 23.1009 8.12326 16

15 9 -1 17.2690 7.43106 18

15 9 1 16.5172 6.76735 18

9 15 -1 14.4812 6.34151 18

9 15 -1 21.6073 7.55342 16

-1 9 -15 13.8326 5.50885 15

-9 3 -15 257.878 19.2940 8

-15 9 3 262.911 15.8413 9

-15 -3 9 233.114 15.3967 10

-15 9 3 275.033 19.6098 10

-15 9 -3 271.134 18.3229 10

-15 3 -9 266.060 17.6055 8

-9 -3 -15 299.130 20.8636 7

-9 -3 -15 284.386 21.0782 8

-15 -3 -9 264.674 19.3153 6

-15 3 -9 271.626 19.7203 6

-9 15 -3 250.771 14.6528 30

-3 9 15 268.109 17.4056 29

3 15 9 311.520 18.4798 29

3 15 9 214.304 14.5785 30

-9 15 3 262.470 17.4141 30

-3 15 9 262.712 18.8200 30

-3 9 15 275.172 18.0343 30

9 15 -3 243.952 17.9322 28

9 15 3 261.447 18.1964 28

3 9 -15 253.139 17.9642 27

3 9 15 307.569 16.6777 26

-9 3 15 287.632 19.6884 25

-9 -3 15 226.863 17.9139 25

3 15 9 280.184 18.2012 26

9 15 3 243.946 14.7972 26

-3 15 9 263.993 16.8220 26

-15 9 -3 221.699 13.9383 24

9 -3 -15 262.891 19.5229 12

9 3 -15 257.802 19.7886 12

15 -3 -9 259.478 19.8212 12

15 3 -9 254.574 19.2162 12

-3 15 9 260.693 17.2555 13

-9 15 3 293.449 19.3059 13

-15 9 3 257.446 16.2126 13

-3 9 -15 285.493 17.1580 22

9 15 -3 282.983 17.0036 23

3 9 -15 249.675 14.7039 23

3 15 -9 262.257 18.9153 23

-3 15 -9 283.712 19.1901 23

-3 15 -9 267.711 17.9271 22

-9 15 -3 286.224 19.1887 23

-9 15 -3 257.909 18.6338 22

-15 3 -9 267.464 14.8254 22

9 15 -3 298.080 20.9563 19

-3 9 -15 285.211 18.9483 20

15 9 3 258.457 15.8526 19

3 15 -9 297.139 18.5888 20

9 15 3 238.089 19.6155 19

-9 15 3 254.585 18.8164 21

-9 15 -3 245.540 15.7537 21

-15 9 3 238.576 18.1522 21

-3 15 -9 295.310 20.0459 20

-15 9 -3 270.864 18.7772 21

-15 3 -9 256.545 16.1048 14

15 9 -3 255.174 19.5259 18

-3 15 -9 232.296 14.3249 15

9 15 -3 247.696 18.4555 18

-9 3 -15 252.037 15.5078 15

3 9 -15 283.485 18.1285 15

9 15 -3 257.309 19.1451 16

-15 9 5 221.323 14.0051 9

-15 9 5 266.377 18.6611 10

-15 9 -5 188.786 14.7839 10

-15 -5 -9 177.994 16.8815 8

-15 5 -9 214.764 17.1571 10

-9 -5 -15 211.222 17.3667 8

-5 -9 -15 181.930 16.0233 7

-15 -5 -9 220.257 16.4744 6

-15 5 -9 247.903 17.5548 6

15 9 -5 231.706 15.9023 28

15 9 5 244.803 15.7313 28

5 15 9 231.853 15.1970 29

9 5 -15 215.170 16.1628 27

-5 9 15 207.267 14.4726 29

-9 15 5 243.178 16.4245 30

-5 15 9 221.009 16.9671 30

-5 15 9 221.941 17.1427 29

-5 9 15 223.884 16.3408 30

9 15 -5 197.167 15.3630 28

9 15 5 232.719 15.8605 28

-5 15 -9 263.787 17.0979 24

5 9 -15 236.151 16.9205 27

-9 5 15 228.423 16.8397 25

-9 -5 15 219.025 16.1040 25

5 15 9 228.948 16.4711 26

9 15 5 212.298 14.2783 26

-15 9 -5 204.081 13.9757 24

9 -5 -15 204.333 15.7185 12

9 5 -15 232.400 17.2823 12

15 -5 -9 250.195 17.9633 12

15 5 -9 237.431 17.4192 12

-5 15 9 199.232 15.6045 13

-15 9 5 209.899 15.4199 13

-5 9 -15 218.329 15.9556 22

-15 5 -9 195.961 13.4110 22

9 15 -5 244.699 16.1890 23

5 9 -15 221.007 14.1161 23

5 15 -9 220.368 17.2239 23

-5 15 -9 256.714 17.5810 22

-15 9 -5 215.556 12.9496 22

-5 15 -9 206.928 15.8954 23

-9 15 -5 235.620 16.7300 23

-9 5 -15 214.342 17.2283 22

-9 15 -5 227.872 17.0224 22

5 15 -9 210.024 14.1748 19

5 15 -9 192.732 14.3325 20

-5 9 -15 213.013 15.0805 20

-5 15 -9 227.463 17.6207 20

-9 15 5 189.512 16.1269 21

9 15 5 232.175 18.0464 19

-15 9 5 220.661 16.7694 21

9 15 -5 229.963 18.0342 19

5 9 -15 237.773 15.9172 15

15 5 -9 235.022 18.5239 18

15 9 -5 226.853 18.0202 18

9 15 -5 178.224 15.4724 18

-9 5 -15 210.931 14.7637 15

-5 9 -15 231.812 17.1388 15

-15 5 -9 205.147 13.1813 14

-9 -7 -15 17.0525 6.23098 8

-15 -9 -7 12.6165 6.61953 8

-15 -7 -9 17.2939 6.31427 8

-15 9 7 19.2061 5.20816 9

-7 -9 -15 21.7787 5.92809 8

-15 9 7 17.3312 6.68887 10

-15 9 -7 20.8232 6.29446 10

-15 -7 -9 21.5449 5.74199 6

-15 7 -9 18.8319 5.57658 6

-9 -7 -15 25.8925 7.86874 7

-7 -9 -15 22.6310 7.52763 7

-7 9 15 11.5390 6.05585 30

15 9 -7 17.8688 4.92626 28

15 9 7 26.0511 5.55779 28

7 15 9 16.3966 4.77112 29

9 15 -7 18.8034 5.52324 28

-9 15 7 22.5827 6.21298 30

9 15 7 22.6195 5.42905 28

-9 7 15 20.6987 5.98574 25

-9 -7 15 27.2111 6.21115 25

7 9 -15 25.1087 7.22032 27

9 15 7 19.7187 5.75560 26

15 -7 -9 17.9196 5.73097 12

15 7 -9 12.9863 5.36212 12

-7 15 9 14.6781 6.10236 13

-9 15 7 31.2573 7.19863 13

-7 9 15 19.3119 4.75498 13

9 -7 -15 18.4071 5.49187 12

9 7 -15 19.7659 5.76935 12

-15 9 7 23.7935 6.62630 13

-9 7 15 14.8988 4.87469 13

-9 7 -15 19.6548 6.73147 22

-7 9 -15 32.3217 7.30264 22

-15 9 -7 17.6692 5.30837 24

-7 15 -9 20.3160 6.40459 23

-7 15 -9 26.6756 6.50052 24

-9 15 -7 31.6162 7.40756 24

-9 15 -7 25.0592 6.82157 23

7 9 -15 22.0497 5.58863 23

9 15 -7 27.2788 6.83168 23

7 15 -9 24.3525 6.69839 23

9 15 -7 18.4202 6.14457 19

-15 7 -9 17.3985 5.00947 22

7 15 -9 14.5119 5.15698 19

-15 9 -7 19.4090 4.92212 22

-7 15 -9 20.0671 6.64589 22

9 15 7 12.4192 5.78625 19

-7 15 9 27.9884 6.90198 21

-9 15 7 14.5720 6.07635 21

-7 9 -15 18.1958 4.90201 20

-15 9 7 18.8146 5.93275 21

-15 7 9 17.7006 4.95541 21

-9 7 -15 32.5543 6.82732 15

-7 9 -15 17.8556 6.11702 15

7 9 -15 12.0074 4.70649 15

15 7 -9 25.7533 7.82651 18

15 9 -7 16.3237 6.45626 18

7 15 -9 20.0308 5.26987 18

9 15 -7 15.7784 5.76695 18

-9 -9 -15 15.4031 4.82116 8

-15 9 9 13.8849 3.91095 9

-15 -9 -9 12.6372 4.99624 8

-15 9 9 8.55796 5.43725 10

-9 -9 -15 16.6952 5.92375 7

-9 15 9 11.4184 5.06573 30

15 9 -9 17.7798 4.16753 27

9 15 9 16.4662 5.00448 26

-9 15 9 13.1192 5.60351 13

-9 9 15 14.6111 4.52507 13

-15 9 9 10.7913 4.90623 13

-15 9 -9 13.0568 4.89946 24

-9 15 -9 9.97589 5.15216 24

-9 15 -9 14.0098 5.11886 23

9 9 -15 7.54324 3.95896 23

9 15 -9 8.83703 4.48370 23

-9 9 -15 8.34822 4.66840 22

9 15 -9 16.9076 5.21631 19

-15 9 -9 12.6492 4.30574 22

-9 15 -9 18.5433 5.94699 22

-9 15 9 9.74285 4.70776 21

-15 9 9 17.0850 4.67009 21

-9 9 -15 16.9211 5.29040 15

9 9 -15 7.66791 3.87277 15

9 9 -15 18.1483 5.58307 18

15 9 -9 19.9260 6.23786 18

9 15 -9 11.8258 4.43861 18

-11 15 1 130.700 13.0261 9

-15 -1 11 123.168 12.0025 10

-15 11 1 116.826 11.7095 10

-15 11 -1 123.259 11.5683 10

-11 -1 -15 150.866 13.7285 7

-11 1 -15 151.674 12.7247 7

-15 -1 -11 166.751 15.0354 8

-15 1 -11 163.182 14.5331 8

-15 -1 -11 160.563 12.9250 7

-11 1 -15 156.571 14.7132 8

-15 -1 -11 182.277 16.1850 6

15 11 1 180.871 14.8115 28

1 11 15 141.488 13.4333 29

-1 11 15 150.125 13.2829 29

1 15 11 150.747 13.6571 29

1 15 11 148.492 11.7678 30

-1 15 11 140.071 12.7615 30

-1 11 15 149.371 12.0019 30

11 15 1 139.087 13.3872 28

1 11 15 121.185 9.95879 26

1 15 11 162.141 13.2624 26

-11 -1 15 149.273 14.3345 25

-1 15 11 140.042 11.9441 26

11 -1 -15 142.795 14.3931 12

-15 -1 -11 142.761 12.5961 14

15 -1 -11 144.661 14.5755 12

-11 15 1 143.922 12.4390 13

-15 11 1 128.439 10.2647 13

1 15 -11 165.375 14.2503 23

1 11 -15 131.613 10.4968 23

-1 15 -11 149.024 13.5446 23

-11 -1 -15 153.035 13.8908 22

-1 11 -15 126.159 9.90224 23

-11 1 -15 177.760 14.9273 22

-1 15 -11 143.287 10.8448 22

-15 1 -11 141.343 10.8898 22

15 11 1 113.706 12.0126 19

11 15 -1 147.238 14.8273 19

-1 11 -15 172.212 15.1618 20

1 15 -11 131.372 13.3876 20

11 15 1 167.289 15.3095 19

-1 15 -11 157.893 14.2080 20

-11 15 1 110.522 12.1895 21

-11 15 -1 140.239 12.7209 21

-15 11 -1 146.693 13.7999 21

15 11 -1 166.701 14.6064 19

15 11 1 155.825 12.5607 16

11 15 1 177.782 15.4638 16

15 11 -1 124.639 13.4033 18

-1 15 -11 133.787 10.0512 15

-1 11 -15 141.244 12.6066 15

1 11 -15 152.105 12.5123 15

-15 1 -11 127.812 11.3615 14

15 11 -1 125.831 11.1832 16

11 15 -1 139.747 13.6772 16

-11 3 -15 3.51917 4.66361 8

-11 15 3 1.16944 5.00284 9

-15 11 3-1.78498 4.07007 9

-15 11 3 1.00301 3.65926 10

-15 11 -3 4.10648 4.03391 10

-15 3 -11-1.97028 4.49258 8

-11 -3 -15 1.37906 4.87142 8

-15 -3 -11 1.13253 4.13179 7

-15 -3 -11-1.22278 4.98757 6

-15 3 -11 1.26495 5.15959 6

-11 -3 -15 2.51651 4.86892 7

11 15 -3 3.36687 4.57769 28

-3 11 15-2.05764 4.69176 30

11 15 3-1.09970 4.70447 28

15 11 -3-1.07531 3.92300 28

15 11 3 1.06686 4.12828 28

3 11 15 1.15630 4.94664 29

3 15 11-1.05932 4.42757 29

-11 15 3-0.77830 3.68857 30

-3 11 15-1.04750 5.14492 29

-3 15 11-1.13136 4.37787 30

-3 15 11 1.20346 4.65689 29

-11 3 15-1.19813 5.57207 25

-11 -3 15 1.17718 4.92018 25

3 11 15 3.19092 3.56442 26

3 15 11 1.03714 4.12328 26

11 -3 -15 4.99247 5.33942 12

11 3 -15-1.28203 5.09686 12

-15 3 -11 0.68747 2.94099 14

15 -3 -11 1.27216 5.31712 12

15 3 -11-2.51833 5.62619 12

-3 15 11 0.81264 3.92197 13

-11 15 3-2.15231 5.10016 13

-15 11 3 1.72797 3.43487 13

-3 15 -11 1.08787 4.32495 23

-11 3 -15 2.45196 4.87402 22

-11 -3 -15-3.36527 4.34072 22

-11 15 -3-2.20880 5.13618 23

-15 3 -11-0.76799 3.43154 22

11 15 -3 0.78051 3.41406 23

3 11 -15-0.80285 3.35562 23

3 15 -11 5.79205 5.17601 23

-15 11 -3-1.06570 4.55903 21

15 11 3 1.82385 4.07466 19

15 11 -3-3.75240 4.97270 19

-3 11 -15 2.56204 3.73556 22

11 15 3 2.61673 4.77327 19

-3 15 -11 0.91213 3.90206 22

-11 15 -3-2.13568 4.13209 22

3 11 -15-1.24044 4.52547 20

3 15 -11 1.09271 4.22833 20

-3 11 -15 1.15970 4.23091 20

-3 15 -11 6.19478 5.41934 20

-11 15 -3 5.17013 4.64955 21

-15 11 3 2.40921 5.15328 21

11 15 -3 1.18954 4.72914 16

-3 15 -11-2.20364 3.73016 15

15 11 3 5.59238 4.57796 16

11 15 3-1.24333 4.39197 16

-3 11 -15 1.07506 4.38505 15

15 11 -3 2.69257 4.75565 18

11 15 -3-1.28604 4.97643 18

3 11 -15-2.64709 3.68795 15

-11 -5 -15 6.12455 5.91416 8

-15 -5 -11 3.51206 4.89604 7

-11 15 5 10.7705 5.01193 9

-15 11 5 3.28470 3.82286 9

-15 -5 -11 12.7524 6.58175 8

-15 11 5 6.74372 4.73492 10

-11 -5 -15 14.9867 6.44585 7

-5 11 15 10.4945 5.50119 30

11 15 -5 14.0955 5.07339 28

11 15 5 9.82016 4.31198 28

15 11 -5 12.7627 4.48084 28

15 11 5 9.62931 4.51979 28

5 15 11 8.11393 4.35444 29

-11 15 5 11.1555 4.36391 30

-5 11 15 6.21416 4.51135 29

-5 15 11 11.1252 5.56034 30

-5 15 11 19.0307 6.53996 29

-11 5 15 19.1484 5.66888 25

-11 -5 15 5.94308 4.69742 25

5 11 15 8.27411 3.99695 26

5 15 11 12.8454 5.10098 26

11 15 5 4.01777 3.11894 26

15 -5 -11 16.4572 5.93575 12

15 5 -11 10.2588 4.95408 12

-5 15 11 10.3531 4.65850 13

-11 15 5 14.9935 5.44126 13

-15 11 5 10.1175 4.59803 13

11 -5 -15 12.1306 5.37886 12

11 5 -15 18.8817 5.82219 12

-15 5 -11 8.38075 4.50668 22

-5 15 -11 13.4555 5.18885 23

-5 11 -15 10.1618 4.34455 24

-15 11 -5 8.64112 4.05666 24

-5 15 -11 11.9704 4.74670 24

-11 5 -15 9.15685 5.11721 22

11 15 -5 6.99535 4.14764 23

5 11 -15 11.2339 4.45506 23

-5 11 -15 11.2703 4.61614 22

11 15 -5 8.84748 6.31640 19

-5 15 -11 6.85627 4.64510 22

-15 11 -5 14.1236 4.22580 22

-11 15 -5 1.03316 4.80793 22

5 15 -11 11.8404 4.62837 20

-5 11 -15 13.4616 5.68615 20

-11 15 5 12.6122 6.00979 21

-15 11 5 8.57005 5.52974 21

15 11 -5 12.2043 6.68090 19

11 15 5 9.21356 5.56097 19

5 11 -15 8.07451 3.96453 15

-11 5 -15 5.49236 3.92342 15

-5 15 -11 9.97523 4.26050 15

15 5 -11 7.45455 5.66848 18

15 11 -5 8.90374 5.44413 18

11 15 -5 14.9714 6.03639 18

-11 -7 -15 69.3117 8.99046 8

-15 11 7 70.9827 7.65099 9

-11 15 7 70.2251 8.74898 9

-15 -11 -7 60.1795 8.35939 8

-15 -7 -11 91.2791 10.2951 8

-15 11 7 73.2604 8.79961 10

-15 -7 -11 57.5962 8.77896 7

-11 -7 -15 71.2692 9.70907 7

-7 -11 -15 52.5346 8.24854 7

-7 11 15 52.0513 8.23986 30

15 11 -7 67.7769 7.18293 28

7 15 11 67.6964 7.68065 29

11 15 -7 66.4220 7.41677 28

-11 15 7 53.8251 7.21797 30

15 7 -11 71.7473 8.37858 27

-7 11 -15 81.8423 8.52077 24

15 11 7 61.8261 6.18469 26

11 15 7 77.4309 7.73036 26

-11 7 15 62.6058 7.35617 25

-11 -7 15 61.5089 7.36666 25

7 11 15 68.1664 7.97611 26

7 15 11 58.6284 8.06984 26

15 -7 -11 77.0500 8.00502 12

15 7 -11 68.9737 7.76241 12

-7 15 11 55.1840 7.97820 13

-15 11 7 62.0511 8.13253 13

11 7 -15 56.9974 7.54002 12

-11 7 15 54.4513 7.50589 13

11 -7 -15 76.5460 7.95880 12

-15 11 -7 61.4964 7.89798 24

-7 15 -11 66.8251 8.32348 24

-7 15 -11 80.4728 8.48568 23

-11 15 -7 77.4688 8.81407 23

11 15 -7 77.8331 8.76846 23

7 11 -15 69.2263 7.83777 23

-7 11 -15 87.3886 9.56689 22

-15 7 -11 63.6640 7.61705 22

11 15 -7 79.0404 9.61945 19

-7 15 -11 63.8834 8.98434 22

-15 11 -7 56.4212 6.82211 22

-11 15 -7 71.1711 8.99678 22

11 15 7 72.9319 9.33872 19

7 15 -11 65.5867 7.39884 20

-7 15 11 62.6916 8.33597 21

-11 15 7 65.4005 9.02662 21

-15 11 7 81.0197 9.08302 21

15 7 -11 57.8697 8.87101 18

15 11 -7 82.0038 10.2126 18

11 15 -7 66.4739 8.65689 18

7 11 -15 78.2452 7.14723 15

-11 15 9 180.998 11.7907 9

-11 -9 -15 147.452 11.7918 7

-15 9 11 162.496 11.8702 10

-15 11 9 145.293 10.7721 10

-15 -11 -9 161.107 10.8067 8

-15 -9 -11 162.154 11.6198 8

-15 -9 -11 170.152 12.6424 7

-9 -11 -15 177.855 11.8837 7

-9 15 11 160.295 11.0921 9

-11 15 9 137.962 10.1134 30

-9 15 11 175.965 11.5702 30

-11 9 15 155.771 11.4416 30

15 9 -11 152.217 9.83978 27

11 9 -15 152.668 11.0300 27

-15 9 -11 163.981 11.1829 24

-15 11 -9 148.168 10.6371 24

9 11 15 149.008 10.3704 26

-9 11 -15 140.743 10.2451 24

9 15 11 165.414 10.7808 26

11 15 9 152.410 9.91092 26

-11 9 -15 182.107 11.8979 24

-9 15 11 148.100 10.9731 13

-11 15 9 151.033 11.2447 13

-15 11 9 156.787 11.1682 13

-11 9 15 161.557 10.3423 13

-11 15 -9 155.179 11.3367 24

-9 11 -15 146.425 11.1382 22

11 9 -15 134.400 9.36651 23

11 15 -9 164.735 11.2297 23

9 11 -15 143.978 9.91741 23

9 15 -11 150.568 10.9877 23

-9 15 -11 147.637 11.4792 22

-9 15 -11 150.239 11.0422 24

-11 15 -9 149.407 11.4002 22

-9 15 -11 129.672 9.29720 23

-9 15 11 133.556 9.85725 21

-11 15 9 142.781 10.5948 21

11 15 -9 155.115 11.5292 19

11 9 -15 157.457 11.6260 18

15 9 -11 123.794 11.1869 18

11 15 -9 152.536 10.6411 18

-13 1 -15 205.420 14.9242 8

-13 -1 -15 162.971 12.2902 7

-15 -1 13 145.726 11.0176 10

-15 -1 -13 170.458 11.6996 7

-15 -1 -13 185.670 14.5641 8

-15 1 -13 179.754 13.4536 8

-13 -1 -15 182.353 14.1907 8

1 13 15 190.972 13.8978 29

-1 13 15 171.513 13.1035 29

15 13 1 194.437 13.4742 28

-1 15 13 164.227 13.0437 29

-1 15 13 178.565 11.9951 30

-1 13 15 198.465 11.9893 30

13 15 1 201.882 14.1238 28

1 15 13 184.417 11.9633 26

-1 15 13 181.925 11.1749 26

-13 -1 15 170.212 13.5222 25

13 -1 -15 202.758 15.1391 12

15 -1 -13 187.384 14.5650 12

-13 15 1 175.148 11.5264 13

1 15 -13 183.821 13.1645 23

1 13 -15 181.737 11.2837 23

-1 15 -13 196.321 12.9864 23

-1 13 -15 165.225 10.5163 23

-13 -1 -15 199.451 12.8804 22

-13 1 -15 170.374 12.6474 22

-15 -1 -13 155.903 9.90220 22

-15 1 -13 163.901 10.5125 22

15 13 -1 201.205 14.1861 19

1 13 -15 223.672 14.9747 20

13 15 -1 202.255 14.8710 19

-1 13 -15 188.905 14.3488 20

1 15 -13 215.714 14.7392 20

15 13 1 186.942 13.4984 19

-1 15 -13 187.687 14.0251 20

13 15 1 194.993 14.4483 19

-13 15 1 168.757 13.1098 21

-13 15 -1 205.110 13.4570 21

-15 13 1 170.352 13.3940 21

-15 13 -1 186.762 13.4344 21

-15 -1 -13 180.231 11.4179 14

-1 15 -13 171.943 10.3164 15

-1 13 -15 170.295 11.5135 15

1 13 -15 172.914 11.1124 15

15 13 -1 165.662 11.6592 16

13 15 -1 202.395 13.9084 16

15 13 1 183.827 12.2613 16

13 15 1 201.315 14.1674 16

-13 -3 -15 25.8214 6.66838 8

-15 3 -13 24.6451 5.54928 8

-13 3 -15 17.6870 5.16982 8

-13 15 3 25.9471 5.84258 9

-15 -3 -13 19.3759 5.71341 7

-13 -3 -15 26.2420 6.29923 7

13 15 -3 31.1209 6.41890 28

13 15 3 22.0974 5.60523 28

15 13 -3 29.8687 5.99306 28

15 13 3 33.6521 6.43334 28

3 15 13 25.8580 5.68417 29

-3 15 13 17.4544 5.04567 30

-3 13 15 27.0209 5.85677 29

-3 13 15 17.1885 4.90296 30

-3 15 13 20.5827 6.22609 29

-13 3 15 28.8853 6.42968 25

-13 -3 15 30.1694 6.47222 25

3 13 15 24.9422 5.00109 26

3 15 13 25.7061 5.40180 26

13 3 -15 26.1959 6.01610 12

15 -3 -13 29.2835 6.37147 12

15 3 -13 27.1149 6.32125 12

-15 -3 -13 22.7906 4.94490 14

-13 15 3 22.5926 5.15682 13

-15 13 3 21.3303 4.62314 13

13 -3 -15 27.9333 6.46913 12

3 15 -13 22.0583 5.43249 23

3 13 -15 23.3807 4.89192 23

-3 15 -13 28.3190 5.39641 23

-13 -3 -15 28.7921 5.56806 22

-13 3 -15 35.1201 6.40843 22

-15 3 -13 18.4547 4.36325 22

-15 13 -3 24.3132 5.68748 21

-3 15 -13 15.7119 4.18192 22

15 13 -3 28.2566 6.45638 19

15 13 3 26.4129 5.30322 19

3 13 -15 18.1399 5.85615 20

13 15 -3 27.8311 6.70609 19

13 15 3 26.2733 6.53099 19

3 15 -13 24.0018 5.97252 20

-3 13 -15 23.3630 5.66907 20

-15 13 3 18.9702 5.48717 21

-13 15 -3 20.7031 4.89062 21

-3 15 -13 19.5341 4.33908 15

15 13 3 27.8210 5.86966 16

13 15 3 33.3331 6.82126 16

-3 13 -15 25.7377 5.66666 15

3 13 -15 13.8544 3.87989 15

15 13 -3 15.0740 5.65665 18

-13 -5 -15 20.4353 6.05733 8

-13 15 5 16.6592 4.96903 9

-15 13 5 13.4054 3.97276 9

-15 -5 -13 12.4049 5.08326 8

-15 -5 -13 12.8742 4.83450 7

-13 -5 -15 19.7133 5.61059 7

13 15 -5 11.5904 4.08822 28

13 15 5 17.9872 4.54796 28

5 13 15 15.6860 4.69997 29

5 15 13 15.0784 4.40292 29

15 13 -5 21.7080 4.88070 28

15 13 5 20.5232 4.68885 28

-5 15 13 20.2405 5.33298 30

-5 13 15 17.1784 4.94285 30

-5 13 15 15.7768 4.63428 29

-13 5 15 17.4673 4.79579 25

5 13 15 20.9003 4.59437 26

-13 -5 15 16.3985 4.65325 25

5 15 13 13.5998 4.19054 26

15 -5 -13 17.0065 4.87201 12

15 5 -13 8.89857 4.12451 12

-13 15 5 18.8425 4.96580 13

-15 13 5 14.2324 4.59365 13

13 -5 -15 13.9050 4.63383 12

13 5 -15 17.9280 4.87442 12

5 15 -13 18.5721 4.94927 23

5 13 -15 15.7764 4.08046 23

-5 15 -13 21.6376 5.15210 23

-13 -5 -15 17.6308 4.34074 22

-15 5 -13 18.1307 4.52144 22

15 13 -5 13.2198 4.07514 23

-13 5 -15 17.3654 4.61915 22

13 15 -5 15.0715 4.00242 23

15 13 -5 17.0427 5.40094 19

-5 13 -15 15.4945 4.33701 22

-5 15 -13 17.2677 4.66208 22

-13 15 -5 18.9510 5.02364 22

13 15 5 17.3595 4.67816 19

5 13 -15 16.3709 4.90440 20

5 15 -13 14.3732 4.69017 20

-5 15 13 20.3430 4.40948 21

-5 13 -15 23.1501 5.59410 20

-13 15 5 20.4755 5.28570 21

-15 13 5 22.3769 5.61360 21

-5 13 -15 13.0855 4.20377 15

15 13 5 23.3807 5.13752 16

13 15 5 16.7697 4.78494 16

15 5 -13 12.2412 4.71319 18

15 13 -5 9.68515 5.08297 18

13 15 -5 20.1666 5.97788 18

-13 15 7 164.693 10.7110 9

-15 -7 -13 178.180 12.0690 7

-15 -7 -13 141.292 10.8375 8

7 13 15 138.404 9.58176 29

15 7 -13 174.831 10.5303 27

-7 15 13 176.996 11.1621 30

-7 13 15 171.492 11.0209 30

13 7 -15 150.494 10.2547 27

7 13 15 137.612 9.22461 26

7 15 13 190.317 10.9890 26

-13 15 7 156.250 10.6552 13

-15 13 7 150.307 10.2211 13

-13 7 15 174.179 10.4324 13

-15 7 13 182.446 11.4197 13

13 15 -7 163.796 11.6286 19

-13 15 7 163.058 10.8673 21

15 13 -7 184.858 12.2584 19

13 15 7 165.479 11.0407 16

13 7 -15 158.243 11.5855 18

15 7 -13 145.212 11.2395 18

-7 13 -15 152.998 10.3003 15

-13 7 -15 150.026 10.5714 22

7 15 -13 167.550 10.7597 23

15 -1 -15 5.65082 3.34908 12

-16 0 0 1729.19 56.1975 10

-16 0 0 1782.88 58.3855 6

0 16 0 1755.04 56.4369 30

0 0 16 1683.60 55.3487 25

0 16 0 1702.82 48.8703 23

0 16 0 1667.52 51.0468 19

-16 0 0 1640.59 54.2338 14

0 16 0 1698.70 48.2716 16

-16 0 2 1.40928 5.14145 10

-16 2 0-1.54264 5.80118 10

-16 -2 0-2.55264 5.20597 10

-16 0 -2-1.45350 4.77987 10

-16 0 2-1.61921 5.52579 6

-16 -2 0-1.55907 5.50731 6

-16 2 0-1.56509 5.34110 6

-16 0 -2-1.59191 5.62330 6

0 16 -2-2.86240 5.38211 30

2 16 0 1.38771 5.51698 30

0 16 2-1.41542 5.77335 30

0 -2 16 5.68689 5.94226 25

0 2 16-1.44711 5.90262 25

-2 0 16-1.47791 5.71888 25

2 0 16 2.89894 5.45081 25

0 16 2 4.01188 5.72091 26

-16 0 2 1.30680 5.05675 14

-16 2 0-1.41245 5.46559 14

-16 -2 0 1.31419 5.22471 14

-16 0 -2-2.83867 4.66750 14

2 0 -16 3.10840 6.49597 12

2 16 0-1.81853 3.97725 23

0 16 -2-2.31464 4.22223 23

-2 16 0-1.03985 4.34619 23

0 2 -16-0.99179 3.94297 22

0 16 2-1.31542 5.09012 19

2 16 0-4.02142 5.18707 19

0 16 -2 5.95384 4.78909 19

2 16 0-3.52057 5.35167 16

0 16 2 1.75354 4.07756 16

-2 0 -16 0.97653 3.44953 15

0 2 -16-1.16921 4.39690 15

-16 2 2 114.933 13.4307 10

-2 16 2 84.9916 9.07286 9

-16 -2 2 90.3963 11.4093 10

-16 2 -2 89.7834 12.4941 10

-16 -2 -2 92.2111 11.6988 10

-16 -2 2 88.2442 12.2177 6

-16 2 2 85.2544 12.2405 6

-16 -2 -2 110.048 13.8733 6

-16 2 -2 99.8484 13.3704 6

2 16 -2 128.357 13.0931 30

-2 16 -2 100.894 12.9320 30

2 16 2 98.9709 12.2444 30

-2 16 2 81.8306 11.5289 30

-2 -2 16 96.7486 12.7355 25

-2 2 16 84.9067 11.9023 25

2 2 -16 78.9381 8.36467 27

2 16 2 102.797 12.0819 26

2 -2 16 77.2311 11.2815 25

2 2 16 89.0473 12.0432 25

-16 -2 2 91.9493 11.1525 14

-16 -2 -2 79.4539 11.0554 14

2 -2 -16 102.449 12.9914 12

2 2 -16 102.098 13.1378 12

-16 2 2 93.7201 12.0344 14

2 16 -2 86.9999 10.5627 23

-2 16 -2 98.6919 11.3108 23

-2 2 -16 96.1453 11.5576 22

-2 16 2 89.7266 9.09161 23

2 16 -2 93.8153 11.3565 19

2 16 2 114.760 13.2815 19

2 16 -2 77.3920 10.8097 16

2 16 2 64.3644 9.68446 16

-2 2 -16 91.2350 11.0018 15

-2 -2 -16 87.2571 9.08718 15

-4 0 -16 429.073 25.9976 8

-4 16 0 446.884 21.9369 9

-16 0 4 415.624 24.3454 10

-16 4 0 422.930 25.9147 10

-16 -4 0 411.856 21.2975 10

-16 0 -4 451.211 25.6974 10

-16 0 4 431.185 26.2231 6

-16 -4 0 397.744 23.9232 6

-16 4 0 419.973 24.9249 6

-16 0 -4 416.252 25.7206 6

4 16 0 403.920 23.1105 30

-4 16 0 393.896 23.6159 30

0 16 4 394.245 23.5086 30

4 0 -16 394.287 17.9640 27

0 16 4 378.781 20.7148 29

4 16 0 395.434 23.6994 28

0 -4 16 380.777 23.0468 25

0 4 16 430.545 24.5196 25

-4 0 16 352.738 23.0594 25

0 16 4 417.257 24.0379 26

4 16 0 397.897 20.8505 26

4 0 16 395.495 24.3063 25

16 0 -4 411.738 26.1816 12

4 0 -16 418.567 25.6867 12

4 16 0 403.737 18.9372 23

0 16 -4 427.147 23.4647 23

0 4 -16 396.623 19.7322 22

-4 16 0 451.957 22.3068 23

4 16 0 364.801 23.4308 19

0 16 -4 407.025 21.5621 20

4 16 0 433.794 23.9336 16

0 16 4 362.516 18.1819 16

0 4 -16 445.767 23.9297 15

16 4 0 417.548 20.6572 18

-16 -4 0 424.623 22.9342 14

-4 0 -16 433.436 20.1253 15

-2 16 4 11.8894 4.38419 9

-4 16 2 5.23094 4.57860 9

-4 -2 -16 13.6265 6.47882 8

-16 2 4 3.04664 5.55950 10

-16 4 2 15.7280 7.45539 10

-16 -2 4 7.16923 4.62607 10

-16 -4 2 15.1965 5.62257 10

-16 2 -4 15.4654 7.59749 10

-16 -4 -2 10.1274 5.43284 10

-16 -2 -4 8.10777 5.91262 10

-16 -2 4 7.96266 6.81446 6

-16 2 4 9.56378 7.27055 6

-16 -4 2 2.88506 4.92512 6

-16 4 2 5.89583 5.86180 6

-16 -4 -2 4.28780 5.21650 6

-16 4 -2 10.2390 5.96811 6

-16 -2 -4 10.7855 5.96409 6

-16 2 -4 7.78884 6.51260 6

-2 16 4 15.9063 6.50890 29

-2 4 16 2.51219 3.82175 29

2 16 -4 9.87832 6.17453 30

4 16 -2 14.6914 6.44754 30

-2 16 -4 9.66588 5.63429 30

4 16 2 10.8044 5.89829 30

-4 16 -2 1.36064 5.55192 30

2 16 4 6.34127 5.54952 30

-4 16 2 5.66191 5.77552 30

-2 16 4 14.1357 5.62178 30

2 16 4 1.84883 3.95746 29

-2 -4 16 10.9036 6.46107 25

-2 4 16 5.51762 5.33981 25

4 2 -16 6.22959 3.97926 27

-4 -2 16 7.25713 5.61840 25

-4 2 16 7.33945 6.28138 25

2 4 -16 8.03034 4.45989 27

4 -2 16 4.18462 5.54750 25

4 2 16 4.28711 5.05018 25

2 16 4 13.0525 6.41267 26

4 16 2 4.67194 4.52209 26

2 -4 16 13.1089 7.46817 25

2 4 16 10.7887 6.39302 25

-16 -2 4 5.42321 4.94860 14

-16 4 -2 1.37471 5.01754 14

-16 -4 2 10.8441 5.14148 14

-16 2 -4 16.5078 6.87385 14

16 2 -4 4.81840 7.32604 12

16 -2 -4 3.24496 7.54708 12

-16 -4 -2 23.9193 7.76202 14

-16 -2 -4 14.2439 6.23224 14

-2 16 4 10.9671 6.37729 13

-4 16 2 11.3229 6.70939 13

2 -4 -16 12.4177 6.16677 12

2 4 -16 11.4257 6.77032 12

4 -2 -16 12.1316 7.18835 12

4 2 -16 7.69565 5.25464 12

2 16 -4 11.1291 5.96983 23

-2 16 -4 3.91488 5.71002 23

-4 16 -2 8.62775 5.50925 23

-4 16 2 14.2722 5.21158 23

-4 2 -16 14.8957 6.87828 22

-2 4 -16 10.2560 5.40272 22

4 16 -2 7.21587 4.70335 23

-16 4 2 13.7006 6.61391 21

2 16 -4 9.30154 4.62033 19

-2 16 -4 6.32413 5.76998 22

-4 16 -2 6.97481 5.69187 22

4 16 2 6.18339 5.81517 19

-4 16 -2 13.9043 5.65893 21

2 16 -4 7.38345 4.37656 20

4 16 -2 8.16852 5.55510 19

2 16 4 10.7536 6.86580 19

4 16 -2 4.11526 6.00209 16

-2 4 -16 10.9662 6.18940 15

4 16 2 1.27873 5.21797 16

2 16 4 9.30516 5.73796 16

16 2 -4 8.06951 4.69345 18

16 4 -2 13.7854 5.72380 18

-4 2 -16 16.7356 6.03548 15

-4 16 4 1357.01 42.8891 9

-4 -4 -16 1474.64 49.7657 8

-16 4 4 1349.84 50.0724 10

-16 -4 4 1361.93 41.7217 10

-16 -4 -4 1491.98 46.1234 10

-16 -4 4 1403.55 48.9173 6

-16 4 4 1411.41 49.4160 6

-16 -4 -4 1458.71 49.2106 6

-16 4 -4 1367.21 48.5794 6

-4 16 -4 1409.73 47.2008 30

4 16 4 1439.12 44.8289 30

4 16 4 1359.14 38.6038 29

4 4 -16 1435.61 43.5987 27

-4 -4 16 1386.72 47.6574 25

-4 4 16 1453.37 48.7166 25

4 16 4 1386.23 45.9584 26

4 -4 16 1368.64 46.5898 25

4 4 16 1396.25 47.3472 25

-16 -4 -4 1410.59 48.2770 14

-4 16 4 1447.23 48.9680 13

16 4 -4 1377.48 48.9298 12

16 -4 -4 1383.54 49.3624 12

4 -4 -16 1480.97 49.2163 12

4 4 -16 1423.99 48.8546 12

4 16 -4 1401.64 45.4365 23

-4 16 -4 1440.62 47.6673 23

-4 4 -16 1496.63 48.0534 22

-4 16 -4 1384.35 47.7798 22

-4 4 -16 1411.02 39.5625 20

4 16 -4 1360.19 45.3987 19

4 16 4 1406.20 50.6158 19

-16 4 4 1395.57 46.3866 21

-16 4 -4 1363.25 46.5554 14

16 4 -4 1327.13 44.6361 18

-4 4 -16 1445.07 45.8024 15

-16 -4 4 1322.81 41.0131 14

-6 0 -16 3.09743 5.99287 8

-6 16 0-1.18803 4.59716 9

-16 0 6 1.34372 5.05313 10

-16 6 0-1.50405 5.65605 10

-16 0 -6 1.46713 5.18250 10

-16 0 -6 1.56090 5.69458 6

-16 -6 0-3.69562 5.02468 6

-16 6 0 1.28131 4.67458 6

6 16 0 3.28482 4.35305 30

6 16 0 4.16169 4.73412 28

-6 16 0 1.29096 5.39570 30

0 16 6-1.29399 5.27806 30

0 16 6 1.17315 4.41169 29

0 -6 16 1.20694 4.53876 25

0 6 16-2.40809 4.91116 25

-6 0 16 1.46530 5.17606 25

0 16 6 1.32013 4.50512 26

6 16 0 0.89313 3.35864 26

16 0 -6-3.23639 6.08530 12

-16 -6 0 2.16764 3.56415 14

-16 0 -6-4.09672 5.57002 14

6 0 -16 4.65773 6.17244 12

0 16 -6-1.34047 5.60266 23

-6 0 -16-1.45533 5.14085 22

-6 16 0 1.11417 4.54458 23

-16 6 0 2.84204 6.34940 21

0 16 -6-3.07818 4.18518 22

-6 16 0 2.46828 5.51438 21

0 16 -6 1.18407 4.31979 20

6 16 0 4.61219 6.42572 19

6 16 0-1.41841 5.17473 16

0 6 -16 1.30174 5.44078 15

16 6 0-1.12491 5.02632 18

-6 0 -16 0.76663 3.35334 15

-2 16 6 67.1320 8.25931 9

-16 2 -6 54.4717 9.42594 8

-6 -2 -16 69.1240 11.1813 8

-6 16 2 50.4935 9.28680 9

-6 2 -16 42.0904 10.7716 8

-16 2 6 86.0965 11.8605 10

-16 -2 6 70.4006 10.0019 10

-16 6 2 82.0306 12.6005 10

-16 6 -2 76.9848 11.3575 10

-16 2 -6 53.0065 10.3102 10

-16 -2 -6 89.4408 11.6533 10

-16 -2 -6 76.7307 11.2926 6

-16 2 -6 74.8510 11.4638 6

-6 -2 -16 58.3197 10.6289 7

-16 -6 2 59.0789 9.26254 6

-16 6 2 51.3048 9.43116 6

-16 -6 -2 67.3924 9.74855 6

-16 6 -2 53.3260 9.75874 6

-2 6 16 65.6593 9.01155 29

6 16 2 65.8202 8.94646 30

-6 16 -2 74.2670 10.7147 30

6 16 2 74.7502 11.0190 28

2 16 6 66.2957 10.0195 30

-6 16 2 54.2958 9.95523 30

-2 16 6 71.8060 10.6221 30

2 16 6 85.8480 10.3568 29

-2 16 6 66.5605 10.1104 29

2 -6 16 62.5437 9.99141 25

2 6 16 65.0541 9.89733 25

-2 -6 16 74.6994 10.7740 25

-2 6 16 61.3415 9.57180 25

2 6 -16 67.6181 9.00038 27

-6 2 16 79.0797 11.5663 25

-6 -2 16 65.4112 10.6799 25

2 16 6 67.4606 10.4483 26

6 16 2 68.8494 9.39819 26

-2 16 6 55.6235 9.65570 26

-16 -6 2 54.4739 7.67854 14

-16 2 -6 79.7501 11.1908 14

-16 -6 -2 64.3754 9.47237 14

16 6 -2 83.0034 11.5883 12

16 -6 -2 70.5176 11.1832 12

-2 16 6 70.3084 10.6860 13

6 -2 -16 79.0980 11.9238 12

6 2 -16 56.4069 10.1897 12

-16 6 2 62.1979 8.23225 13

16 2 -6 66.8956 11.4990 12

16 -2 -6 64.6362 12.4239 12

2 16 -6 57.6262 9.70099 23

-2 16 -6 70.0488 10.2724 23

-6 16 -2 75.0832 10.7140 23

-6 16 2 72.5443 9.28845 23

-2 6 -16 82.4834 10.3226 22

-6 2 -16 64.7844 10.8905 22

6 16 -2 72.0750 9.06440 23

-16 6 2 98.9880 11.8871 21

-2 16 -6 63.9733 9.85386 22

-6 16 -2 60.0284 10.8668 22

-2 6 -16 60.5054 8.88149 20

2 16 -6 48.6713 8.47563 20

6 16 -2 59.6547 10.6804 19

-6 16 -2 44.7428 7.79198 21

-2 16 -6 68.2756 9.82932 20

-2 6 -16 57.4715 10.0881 15

6 16 -2 63.0737 10.4429 16

6 16 2 50.7610 9.76239 16

16 2 -6 69.5350 9.88059 18

2 6 -16 75.0263 11.0662 15

16 6 -2 75.4344 10.9352 18

16 6 2 77.7919 9.80052 18

-6 2 -16 63.5979 8.77865 15

-4 16 6 5.94762 4.69905 9

-6 -4 -16 4.30364 5.85230 8

-6 16 4 3.41734 4.40915 9

-16 4 -6 7.71630 4.35513 8

-4 -6 -16 15.5392 5.76984 8

-16 4 6 4.57803 6.37902 10

-16 6 -4 11.4069 6.88230 10

-16 -4 -6 3.50596 4.39604 10

-16 -6 -4 3.58486 4.36079 6

-16 6 -4 8.65916 5.04678 6

-16 -4 -6 4.08919 5.27553 6

-16 4 -6 2.80630 5.27766 6

-4 -6 -16 1.49492 5.45489 7

-16 -6 4 4.86399 4.96104 6

-16 6 4 6.31166 5.14999 6

6 16 4 10.8180 6.00562 28

-6 16 -4 12.0933 5.49315 30

6 16 4 14.4454 4.52030 30

4 16 6 4.81676 4.30574 30

-4 6 16 3.89134 3.88934 29

-6 16 4-1.32905 5.81437 30

4 16 6 5.99268 4.27802 29

-4 16 6 8.17507 6.08888 30

6 16 -4 10.0212 5.23664 28

6 4 -16 8.66734 5.67747 27

4 6 -16 8.77292 4.79788 27

-4 6 16 4.69638 4.90841 25

-4 -6 16 15.2171 6.31699 25

-6 4 16 3.99209 5.42879 25

-6 -4 16 2.63095 5.23088 25

4 16 6 4.92974 4.49750 26

6 16 4 1.09925 4.80942 26

4 -6 16 10.1425 5.99428 25

4 6 16 3.41855 5.09268 25

16 6 -4 9.93192 5.43145 12

16 -6 -4-2.52373 5.63925 12

-16 4 -6 9.24077 5.57573 14

-4 16 6 6.56738 5.35856 13

-6 16 4 6.80825 5.27006 13

4 -6 -16 7.00548 5.53445 12

4 6 -16 11.0596 5.93160 12

6 -4 -16 6.75617 5.37301 12

6 4 -16 1.40320 5.12035 12

16 4 -6 4.20488 4.95226 12

16 -4 -6 11.4535 7.15291 12

-4 16 -6 3.98873 5.68888 23

-6 16 -4 1.27471 5.06886 23

-4 6 -16 10.7934 6.65422 22

-6 4 -16 8.26112 5.61702 22

6 16 -4 7.71951 4.82488 23

4 16 -6 5.03226 4.44527 23

-4 16 -6 10.2506 6.29429 22

-6 16 -4 10.8556 6.66565 22

-4 6 -16 1.79375 3.92445 20

6 16 -4 9.37712 5.59996 19

4 16 -6 8.20472 5.03842 19

4 16 -6 8.43889 4.21705 20

6 16 4 7.81706 6.83936 19

-16 6 4 3.76859 4.99526 21

6 16 -4 8.51317 5.49140 16

16 4 -6 1.27312 4.78879 18

16 6 -4 5.22540 4.91373 18

-6 4 -16 5.33894 4.56919 15

-4 6 -16 1.21950 4.45032 15

-6 16 6 80.7352 9.63477 9

-6 -6 -16 63.6013 9.85271 8

-16 6 -6 66.7050 10.5970 10

-16 -6 -6 65.3070 10.0196 6

-16 6 -6 54.8850 9.10657 6

-6 -6 -16 54.6042 10.7422 7

-16 -6 6 60.7830 9.42189 6

-16 6 6 51.4342 9.06569 6

-6 16 6 82.2178 10.9860 30

6 6 -16 65.0064 9.43566 27

-6 6 16 52.1713 9.06794 25

-6 -6 16 55.0462 8.93848 25

6 16 6 64.9694 9.37487 26

6 -6 16 84.2898 10.1066 25

6 6 16 69.9379 9.58437 25

-6 16 6 58.3779 9.96255 13

16 6 -6 69.6329 9.99249 12

16 -6 -6 60.8727 9.67421 12

6 -6 -16 51.2171 8.98109 12

6 6 -16 65.5513 10.1901 12

-16 6 -6 66.1597 8.13850 24

-6 16 -6 74.7938 10.1035 23

-6 6 -16 62.0265 9.65542 22

6 16 -6 74.9327 10.3036 23

-16 6 6 59.4842 9.30945 21

6 16 6 81.6816 11.8614 19

-6 16 -6 61.8041 9.88899 22

6 16 -6 55.5410 9.44678 19

16 6 -6 53.4839 9.74417 18

-6 6 -16 70.6927 9.55674 15

6 16 -6 47.0889 7.49215 18

-8 16 0 1299.74 42.8177 9

-16 0 8 1196.56 41.7498 10

-16 8 0 1201.98 43.0379 10

-16 0 -8 1208.09 43.9901 10

-16 0 -8 1164.60 42.4297 8

-16 -8 0 1137.75 37.0117 6

-16 8 0 1248.85 38.3054 6

-16 0 -8 1238.66 45.2594 6

0 8 16 1255.75 41.2337 29

-8 16 0 1202.87 39.6195 30

0 16 8 1114.97 39.9472 30

0 16 8 1141.08 40.5203 29

0 8 16 1141.23 35.8747 30

8 16 0 1065.62 41.2765 28

0 -8 16 1217.28 37.8104 25

0 8 16 1138.91 36.4817 25

-8 0 16 1085.57 41.8424 25

0 16 8 1176.58 41.3370 26

8 16 0 1143.70 33.2770 26

8 0 -16 1249.56 45.5940 12

-8 16 0 1188.09 41.2594 13

16 0 -8 1138.92 44.4772 12

16 8 0 1093.85 37.0524 12

16 -8 0 1234.27 39.2603 12

0 16 -8 1191.69 42.5805 23

-8 0 -16 1125.66 42.9144 22

-8 16 0 1157.52 39.1811 23

0 16 -8 1196.52 36.6109 22

0 16 -8 1175.76 41.0960 20

-8 16 0 1158.67 40.5234 21

16 8 0 1163.02 38.4090 19

16 8 0 1151.49 40.8715 18

-16 0 -8 1154.67 41.2652 14

-16 -8 0 1158.25 36.4468 14

-8 -2 -16 17.9960 8.10327 8

-2 16 8 21.7940 5.32969 9

-16 -2 -8 33.4189 8.28709 8

-8 16 2 24.2539 6.74148 9

-8 2 -16 36.8015 8.57405 8

-16 2 -8 21.6254 6.89920 8

-16 2 8 27.5657 8.15808 10

-16 -2 8 24.4613 6.78109 10

-16 8 2 19.1051 7.58301 10

-16 8 -2 33.6311 8.35313 10

-16 2 -8 24.3306 7.39660 10

-16 -8 -2 13.6411 5.19747 6

-16 8 -2 31.6559 6.25485 6

-16 -2 -8 26.8375 8.45873 6

-16 2 -8 27.3471 7.55334 6

-8 -2 -16 20.9611 8.07217 7

-16 -8 2 27.5421 6.16803 6

-16 8 2 29.9896 6.29576 6

-2 8 16 30.7013 7.18223 30

8 16 2 21.4549 6.72548 28

-8 16 -2 20.2229 5.90743 30

-2 8 16 20.2353 6.20508 29

-8 16 2 21.6229 6.49625 30

2 16 8 23.4557 6.18464 30

2 16 8 20.4207 6.36723 29

-2 16 8 8.82693 5.65056 30

-2 16 8 25.2839 7.12062 29

2 -8 16 28.5106 6.82805 25

2 8 16 23.7895 6.13507 25

-2 8 16 21.2858 5.67856 25

-2 -8 16 31.7353 6.57796 25

-8 2 16 39.6452 8.91467 25

-8 -2 16 13.5135 6.65108 25

2 16 8 43.9081 7.79868 26

8 16 2 23.1270 5.60322 26

-2 16 8 24.2592 6.92226 26

16 8 -2 20.8278 6.24124 12

16 -8 -2 26.8323 6.55461 12

-16 2 -8 24.6300 6.55220 14

-16 -8 -2 22.6891 6.39401 14

-16 -2 -8 32.1883 7.53144 14

-2 16 8 28.6028 7.03662 13

-8 16 2 18.8893 6.71079 13

16 2 -8 24.7996 8.10457 12

16 -2 -8 22.1740 7.75707 12

-16 8 2 25.3648 5.97693 13

8 -2 -16 26.9621 8.09406 12

8 2 -16 20.4158 7.29746 12

2 16 -8 33.5624 8.25255 23

-2 16 -8 19.5031 7.41812 23

-8 16 -2 17.6923 6.37868 23

-8 2 -16 34.0136 8.77734 22

-2 8 -16 16.4447 5.41704 22

8 16 -2 31.2686 6.38255 23

-16 8 -2 24.9811 7.50108 21

8 16 2 34.8557 8.75228 19

-2 16 -8 20.9368 6.69719 22

-8 16 -2 35.1287 8.81087 22

-2 8 -16 19.7087 6.61725 20

8 16 -2 33.5567 8.53132 19

2 16 -8 28.1779 7.00258 20

-8 16 2 15.6283 7.04036 21

-2 16 -8 36.9965 8.32049 20

-8 16 -2 21.7757 6.26917 21

-16 8 2 11.9244 6.17664 21

2 8 -16 17.9457 6.28290 15

8 16 2 24.5492 7.57855 16

-8 2 -16 20.8541 5.49112 15

16 2 -8 27.2531 7.42142 18

16 8 -2 36.3496 8.12867 18

-2 8 -16 26.1219 7.00671 15

-8 -4 -16 334.942 21.5706 8

-8 16 4 285.764 18.2323 9

-16 4 8 300.339 20.8106 10

-16 8 4 308.718 20.5504 10

-16 8 -4 326.677 19.8795 10

-16 4 -8 265.487 19.2772 10

-16 4 -8 264.543 15.5326 8

-4 16 8 299.920 17.0367 9

-16 -8 4 289.948 16.4254 6

-16 8 4 269.519 16.1344 6

-16 -8 -4 296.367 16.1846 6

-16 8 -4 256.464 15.8531 6

-16 -4 -8 276.735 18.7698 6

-16 4 -8 328.609 20.5338 6

4 16 8 296.577 15.8326 30

-4 8 16 298.837 16.3021 29

4 16 8 276.456 16.3252 29

-8 16 4 325.139 19.2833 30

-4 16 8 288.223 19.1263 30

-4 16 8 286.393 19.4527 29

8 4 -16 308.393 18.2903 27

8 16 -4 302.813 18.6436 28

8 16 4 289.706 18.2472 28

4 8 16 266.625 15.6553 25

-16 8 -4 254.907 13.9122 24

4 8 -16 305.603 18.6954 27

-4 8 16 233.450 15.0196 25

4 8 16 302.122 16.1784 26

-8 4 16 289.225 19.4484 25

-8 -4 16 319.411 19.8659 25

4 16 8 296.060 18.5788 26

8 16 4 304.799 16.8706 26

16 -4 -8 280.189 19.4170 12

16 4 -8 292.853 19.6763 12

-4 16 8 295.889 18.9240 13

16 8 -4 223.429 14.9072 12

-16 8 4 296.840 16.9729 13

8 -4 -16 283.706 18.8829 12

8 4 -16 311.606 20.5234 12

8 16 -4 319.179 17.6951 23

4 16 -8 287.118 18.9655 23

-8 4 -16 298.502 19.8668 22

-8 16 -4 293.621 18.6315 23

-4 16 -8 298.507 18.9909 22

-4 8 -16 268.557 17.2557 22

8 16 -4 293.228 19.6981 19

-4 8 -16 286.771 17.0560 20

4 16 -8 249.757 15.7571 20

-4 16 -8 327.487 20.4494 20

8 16 4 324.537 21.4801 19

-16 8 4 298.386 18.9433 21

4 8 -16 294.752 18.0414 15

16 4 -8 342.606 20.8014 18

-16 4 -8 268.398 16.1957 14

16 8 -4 289.532 19.6770 18

8 16 -4 290.957 18.5838 18

-8 4 -16 281.331 16.6497 15

-4 8 -16 289.592 18.7780 15

8 16 -4 294.871 19.7991 16

-6 16 8 18.4830 5.47904 9

-8 -6 -16 22.2737 6.33394 8

-16 -6 -8 19.1376 6.94934 8

-8 16 6 9.58339 5.05692 9

-6 -8 -16 22.3625 5.94834 8

-16 8 6 20.3267 6.76419 10

-16 8 -6 16.1997 6.00042 10

-16 6 -8 22.4638 6.74210 10

-16 8 -6 20.0465 5.23302 6

-16 -6 -8 23.0984 6.22092 6

-16 6 -8 19.8824 6.04509 6

-8 -6 -16 21.8096 6.92969 7

-6 -8 -16 21.7634 7.20508 7

-16 -6 8 18.0099 5.80662 6

-16 6 8 17.0540 5.84195 6

-16 8 6 9.65446 3.96496 6

16 8 -6 18.8282 5.49522 28

16 8 6 20.5286 5.12607 28

6 16 8 10.3704 4.19533 29

-8 16 6 17.5764 6.34511 30

8 6 -16 22.2965 6.43172 27

6 8 -16 20.5531 7.12206 27

6 16 8 15.9863 5.92161 26

8 16 6 16.8974 5.75276 26

8 -6 16 21.1949 5.70973 25

8 6 16 8.42064 4.44608 25

-6 8 16 19.9856 5.16217 25

-8 6 16 20.0625 5.93827 25

-8 -6 16 20.8123 6.00471 25

6 8 16 25.2745 5.47589 25

16 -6 -8 18.5671 6.45803 12

16 6 -8 18.5347 6.44679 12

16 8 -6 10.4373 4.46609 12

-6 16 8 14.7907 5.59765 13

-8 16 6 12.0139 5.70294 13

8 -6 -16 17.8757 5.73781 12

8 6 -16 20.9827 5.98457 12

-16 8 6 14.8665 6.07262 13

-8 6 16 24.6725 5.26336 13

-16 8 -6 21.3007 5.24852 24

-8 16 -6 22.3793 6.54293 23

-8 6 -16 14.6458 6.00337 22

-6 8 -16 22.1397 6.06660 22

6 8 -16 20.0804 4.51111 23

8 16 -6 25.8464 6.80745 23

6 16 -8 16.9167 5.73630 23

-6 16 -8 19.5996 6.40452 22

-8 16 -6 20.1829 6.94115 22

8 16 -6 14.1390 6.27465 19

6 16 -8 17.7852 5.13993 19

-6 8 -16 17.0058 4.67165 20

-8 16 6 27.2453 7.23981 21

8 16 6 19.8360 6.72326 19

-16 8 6 26.3007 6.59683 21

-8 6 -16 22.3634 5.95786 15

6 8 -16 28.2523 5.96947 15

16 6 -8 21.6572 7.44710 18

-6 8 -16 15.3248 5.47799 15

16 8 -6 16.8242 6.47333 18

8 16 -6 21.7190 6.09878 18

-8 16 8 797.204 28.8736 9

-8 -8 -16 793.458 28.0366 8

-16 8 8 788.273 31.2774 10

-16 -8 -8 788.675 31.5126 8

-8 -8 -16 811.560 32.2161 7

16 8 -8 718.277 23.6583 28

-8 16 8 796.536 29.8101 30

-8 8 16 818.625 30.4172 30

16 8 -8 777.705 24.5427 27

-16 8 -8 782.374 26.7110 24

8 8 -16 811.225 29.9207 27

8 16 8 795.185 28.5656 26

-8 8 16 697.535 24.3749 25

16 8 -8 741.788 25.0841 12

-8 16 8 807.225 30.7756 13

-16 8 8 828.634 29.6112 13

8 8 -16 715.161 24.9872 12

-8 8 -16 796.675 30.3022 22

8 8 -16 723.254 24.0914 23

8 16 -8 817.190 29.6385 23

-8 16 -8 828.543 29.9598 23

-8 16 -8 771.864 30.1199 22

8 16 -8 740.284 27.9981 19

-8 16 8 797.814 30.6762 21

-16 8 8 779.270 26.3336 21

8 8 -16 815.855 27.2753 15

16 8 -8 785.506 31.4860 18

8 16 -8 678.423 24.8118 18

-8 8 -16 794.895 29.0042 15

-16 0 -10 1.20173 4.38426 8

-16 0 10 1.05362 4.18880 10

-16 10 0-3.13121 4.66364 10

-16 0 -10 1.31194 4.31433 6

-16 0 -10 3.85080 3.78276 7

0 10 16-2.22662 3.94724 30

16 10 0-1.13042 4.61089 28

10 16 0-1.18293 4.57747 28

0 10 16 1.06905 4.36056 29

-10 16 0 2.90488 3.74690 30

0 16 10-0.98089 4.29054 30

0 16 10 1.11665 4.77700 29

0 16 10-1.02011 4.26366 26

-10 0 16 1.24781 4.10346 25

-16 0 -10 4.00395 4.37845 14

16 0 -10 1.34819 5.06995 12

10 0 -16 2.66622 5.95660 12

-10 0 -16 3.74521 5.46067 22

16 10 0 1.98867 4.05580 19

0 10 -16 2.40055 5.01671 20

0 16 -10 2.26727 5.27214 20

-10 16 0 4.27508 3.89918 21

10 16 0-2.72843 5.13021 19

10 16 0 6.25635 5.35291 16

16 10 0-1.21736 4.71068 18

0 10 -16 1.05301 3.59357 15

-10 -2 -16 62.0416 10.3963 8

-2 16 10 45.0451 6.45210 9

-10 2 -16 34.6714 8.56436 8

-16 -2 -10 37.3424 9.13255 8

-16 2 10 46.0610 8.45140 10

-16 -2 10 47.0986 7.38925 10

-16 2 -10 46.5401 8.24102 8

-16 10 2 31.0517 7.15490 10

-16 10 -2 42.8490 7.83525 10

-16 -2 -10 45.8970 7.95699 7

-16 -2 -10 35.9826 8.35474 6

-16 2 -10 46.9030 8.76582 6

-10 -2 -16 51.1798 8.98775 7

-2 10 16 51.4711 7.81118 30

16 10 -2 40.0276 7.81064 28

16 10 2 49.6913 8.16421 28

10 16 -2 46.5824 8.58277 28

10 16 2 33.5931 7.68480 28

2 10 16 46.3083 8.33138 29

-10 16 2 51.6870 7.41337 30

-2 10 16 54.0949 8.35762 29

2 16 10 40.9351 6.79694 30

2 16 10 40.8389 7.72070 29

-2 16 10 61.8570 9.47602 30

-2 16 10 50.6127 8.43143 29

-10 2 16 27.7891 7.91057 25

-10 -2 16 40.5623 8.03611 25

2 16 10 36.5856 7.42842 26

-2 16 10 48.1871 7.60213 26

-16 2 -10 57.1124 7.89298 14

-16 -10 -2 37.6054 6.31202 14

-16 -2 -10 23.5565 6.74318 14

16 -2 -10 52.7498 9.27455 12

16 2 -10 59.7921 9.53140 12

-10 16 2 45.2089 8.17622 13

-16 10 2 50.3996 6.56434 13

10 -2 -16 56.6541 9.43326 12

10 2 -16 42.6056 8.69036 12

-2 16 -10 47.6269 8.37704 23

-10 -2 -16 39.1504 8.35011 22

-10 16 -2 65.4719 9.01939 23

-16 10 -2 52.0448 8.97268 21

16 10 -2 57.2688 9.13133 19

-2 10 -16 47.6303 7.01199 22

10 16 2 47.8760 9.03123 19

-2 16 -10 43.7121 7.14184 22

-2 10 -16 56.2134 8.80072 20

2 16 -10 50.5531 8.07970 20

-2 16 -10 40.8450 8.55283 20

-10 16 2 51.9777 8.91312 21

-10 16 -2 38.0338 7.03247 21

-16 10 2 46.2755 8.49041 21

10 16 -2 47.5196 8.64552 16

10 16 2 46.6564 8.56613 16

16 10 -2 47.5248 8.87206 18

-2 10 -16 42.0485 7.78450 15

2 10 -16 41.1651 7.98594 15

-10 -4 -16 14.8680 6.39284 8

-4 16 10 7.87127 4.36733 9

-16 10 4 6.86214 3.42861 9

-16 4 10 1.20376 5.15003 10

-16 10 4 1.04678 4.47855 10

-16 10 -4 5.15937 3.59457 10

-16 -4 -10 11.8407 5.64018 6

-16 4 -10 6.70137 4.77845 6

-10 -4 -16 8.57654 6.12102 7

-4 10 16 6.84118 4.80060 30

16 10 -4 4.75797 4.51026 28

16 10 4-1.85685 4.14885 28

10 16 -4 0.99581 3.63350 28

10 16 4 5.74898 4.09947 28

-10 16 4 6.75700 4.00336 30

4 16 10 0.87351 3.65146 29

-4 10 16 5.85588 3.89101 29

-4 16 10 2.20209 4.60236 30

-10 4 16 3.19455 4.65819 25

-10 -4 16 3.14532 4.78165 25

10 4 -16 0.96361 4.39480 27

4 10 16 3.51901 3.01148 26

4 16 10 1.00682 4.00319 26

10 16 4 1.31296 2.80910 26

-16 4 -10 5.07821 3.32645 14

16 -4 -10 4.45215 4.86896 12

16 4 -10 5.48233 4.69106 12

-4 16 10 3.50576 4.07649 13

-10 16 4-1.06647 4.45785 13

-16 10 4 0.79888 3.92431 13

10 -4 -16-2.16845 4.31089 12

10 4 -16 4.50347 4.92507 12

-10 -4 -16 4.31008 4.71361 22

-4 16 -10 8.33917 5.03120 23

-10 16 -4 4.12816 5.32510 23

10 16 -4 3.12611 3.63513 23

4 10 -16 3.07115 2.96505 23

4 16 -10 1.08209 4.83540 23

-4 10 -16 4.26087 3.80819 22

-4 16 -10 0.92599 3.87080 22

-10 16 -4 4.23665 4.53149 22

10 16 -4 2.48234 4.08207 19

-4 10 -16 2.79990 3.90134 20

4 16 -10 3.50163 4.30013 20

10 16 4 4.91329 5.25510 19

-4 16 -10 11.4706 5.53628 20

16 10 -4 9.00458 5.13336 19

-16 10 4 1.07790 4.91596 21

4 10 -16 1.72525 3.60598 15

-10 4 -16 6.46486 3.46730 15

16 10 4 0.73897 3.30244 16

16 4 -10 1.15112 3.92885 18

16 10 -4 6.09215 5.21278 18

10 16 -4 6.49791 5.13290 18

-16 -10 -6 27.5645 6.79350 8

-10 -6 -16 32.4408 6.93373 8

-6 16 10 26.6042 5.52058 9

-16 10 6 17.8083 4.07614 9

-16 -6 -10 26.0806 7.02872 8

-16 6 10 13.3115 5.74075 10

-16 10 6 16.2466 5.59915 10

-16 10 -6 28.0408 5.36806 10

-16 -6 10 23.4009 5.49487 6

-16 6 10 21.4549 5.60766 6

10 16 -6 25.2557 5.60209 28

-6 10 16 29.4721 6.78711 30

16 10 -6 22.9515 4.93630 28

16 10 6 25.1215 4.99096 28

6 16 10 18.5711 4.58897 29

-10 16 6 33.1675 6.10070 30

-6 16 10 23.2610 5.85098 30

-10 6 16 21.2540 5.34324 25

-10 -6 16 24.9342 5.65262 25

10 6 -16 30.9117 6.05336 27

6 10 16 30.3633 5.65133 26

6 16 10 21.8182 5.70192 26

10 -6 16 21.5709 5.27710 25

10 16 6 30.1604 5.17478 26

10 6 16 20.4943 5.42550 25

16 -6 -10 25.4623 5.47211 12

16 6 -10 28.8971 5.99370 12

-6 16 10 33.7923 6.38710 13

-16 10 6 27.1346 5.87439 13

10 -6 -16 27.8755 5.96269 12

10 6 -16 26.1476 5.87586 12

-10 6 16 21.4895 5.27088 13

-10 6 -16 34.4735 7.33217 22

-6 10 -16 21.6486 4.95643 24

-6 16 -10 26.9332 6.25203 23

-16 10 -6 28.3270 5.20511 24

10 16 -6 35.1762 6.25846 23

6 10 -16 25.1107 4.89776 23

6 16 -10 27.1831 6.40076 23

-6 10 -16 23.8851 5.83540 22

-6 16 -10 22.2911 6.24110 22

-10 16 -6 26.3062 7.50107 22

10 16 6 22.1379 6.09741 19

10 16 -6 25.4827 6.36603 19

-6 16 10 31.7367 6.75235 21

-6 10 -16 30.3885 5.35271 20

-10 16 6 29.9033 7.05206 21

-16 10 6 19.4993 5.61853 21

6 10 -16 27.2948 5.47215 15

-10 6 -16 24.9992 5.75675 15

-6 10 -16 29.4775 6.50546 15

16 6 -10 30.3882 7.35459 18

16 10 -6 30.2822 7.66804 18

10 16 -6 18.8392 5.68638 18

-8 16 10 6.58017 3.77482 9

-10 -8 -16 3.47702 3.23712 8

-16 -10 -8 9.82891 4.22829 8

-16 -8 -10 12.4962 4.88661 8

-16 8 10 8.11212 5.20123 10

-16 10 8 9.63209 4.20789 10

-10 -8 -16 5.59280 4.16732 7

-8 -10 -16 7.50668 4.37233 7

-8 10 16 4.93907 3.68080 30

-10 16 8 5.67159 3.48492 30

-8 16 10 8.97840 4.07991 30

16 8 -10 6.63217 2.94263 27

8 10 16 6.63045 3.36998 26

8 16 10 8.17801 3.65427 26

10 16 8 5.12914 2.80794 26

-8 16 10 5.41027 3.92741 13

-10 16 8 5.05860 4.07139 13

-16 10 8 8.25426 4.33082 13

-10 8 16 12.0789 3.68250 13

-16 8 10 9.58506 4.18737 13

-8 10 -16 3.96936 3.62304 24

-16 8 -10 7.30976 3.48455 24

-16 10 -8 10.2660 3.44247 24

-8 16 -10 13.4220 4.41933 23

-10 16 -8 4.44444 3.64095 23

-10 8 -16 4.32720 3.53282 22

10 16 -8 12.6161 4.11959 23

8 16 -10 9.61750 4.26464 23

-16 10 8 6.76881 3.59641 21

-8 10 -16 7.28356 4.04529 22

-8 16 -10 10.6872 4.91881 22

10 16 -8 6.37248 4.36135 19

-8 16 10 13.1288 4.67440 21

-10 16 8 17.3457 5.16663 21

8 10 -16 10.2264 3.20588 15

-10 8 -16 4.23481 3.58693 15

-8 10 -16 11.8435 4.66914 15

10 8 -16 9.90178 4.45459 18

10 8 -16 16.7092 3.71424 15

16 8 -10 9.26979 4.93187 18

16 10 -8 7.52077 4.37431 18

10 16 -8 5.14720 3.21723 18

-12 0 -16 163.112 13.7201 8

-16 0 12 182.696 12.5366 10

-16 0 -12 207.858 14.3605 8

16 12 0 177.509 13.0100 28

0 12 16 174.284 12.8689 29

0 16 12 194.705 12.2480 30

0 16 12 198.936 13.6437 29

12 16 0 178.225 13.3252 28

0 16 12 180.536 11.9126 26

-12 0 16 202.573 14.3999 25

12 0 -16 210.395 15.0748 12

16 0 -12 202.603 14.8208 12

0 16 -12 221.436 14.1517 23

-12 0 -16 196.935 13.5837 22

16 12 0 191.443 12.9565 19

0 12 -16 198.237 14.3086 20

0 16 -12 198.154 13.8423 20

12 16 0 204.075 14.7948 19

-12 16 0 177.581 12.9027 21

-16 12 0 197.217 14.0898 21

-16 0 -12 211.202 12.0804 14

0 12 -16 187.771 12.0473 15

12 16 0 229.717 14.9028 16

-16 2 -12 43.0891 7.05775 8

-12 2 -16 24.4637 6.27043 8

-16 2 12 23.2679 5.91011 10

-16 -2 -12 34.7504 7.53459 8

-16 12 2 25.7528 4.96797 10

-16 -2 -12 22.1335 5.15535 7

-12 -2 -16 25.7944 5.89277 7

12 16 -2 29.4385 6.27246 28

12 16 2 29.1686 6.47149 28

16 12 -2 26.0440 5.73468 28

16 12 2 31.9604 6.17640 28

2 12 16 40.9470 6.81366 29

-2 12 16 36.7201 6.25328 29

2 16 12 34.9103 6.70191 29

-2 16 12 32.9814 6.50177 30

-2 12 16 34.1919 5.74130 30

-12 2 16 34.3659 7.40718 25

-12 -2 16 26.3787 6.09932 25

2 16 12 39.4075 6.55742 26

16 -2 -12 44.2236 7.79682 12

16 2 -12 26.8727 6.37682 12

-16 -2 -12 23.6775 5.29786 14

-12 16 2 33.4155 6.04340 13

12 -2 -16 36.0086 7.37448 12

12 2 -16 24.3001 6.14890 12

2 16 -12 30.7664 6.63292 23

-2 16 -12 28.1351 6.15478 23

-12 2 -16 24.6240 5.90599 22

-12 -2 -16 26.1981 5.84382 22

-16 12 -2 27.1524 6.30987 21

16 12 2 30.9765 5.39082 19

12 16 2 32.3393 6.73161 19

16 12 -2 26.4463 6.19156 19

-2 12 -16 36.0629 7.07643 20

2 16 -12 30.0005 6.22820 20

-2 16 -12 40.7535 7.25197 20

12 16 -2 44.6421 7.46559 19

-12 16 2 19.1616 5.54617 21

-12 16 -2 31.3607 5.78058 21

-16 12 2 30.1978 6.74350 21

12 16 -2 31.4587 6.44911 16

16 12 2 39.2646 5.68461 16

12 16 2 37.2543 6.54165 16

-2 12 -16 20.4914 5.35771 15

16 12 -2 27.0731 6.66943 18

2 12 -16 27.2323 5.23861 15

-12 -4 -16 642.071 26.1445 8

-16 -4 -12 670.433 24.6523 7

-12 16 4 655.198 24.8865 9

-16 4 12 639.763 25.4136 10

-12 -4 -16 628.613 25.2741 7

-4 16 12 598.978 20.9956 9

4 12 16 657.841 24.5216 29

4 16 12 649.819 23.3910 29

16 12 -4 592.450 22.7773 28

16 12 4 674.803 23.7004 28

-4 16 12 664.586 24.7852 30

-4 12 16 616.039 22.7596 29

-4 12 16 664.311 23.8802 30

-4 16 12 643.652 24.9181 29

12 16 -4 613.684 23.2403 28

12 16 4 639.477 23.2825 28

12 4 -16 644.473 23.7700 27

4 12 16 644.057 21.1957 26

4 16 12 664.869 23.9469 26

-12 4 16 631.941 24.3958 25

-12 -4 16 593.592 23.5687 25

12 -4 -16 644.355 24.6011 12

12 4 -16 619.571 24.3742 12

16 -4 -12 673.023 25.1635 12

16 4 -12 593.537 23.9402 12

-16 -4 -12 645.494 23.7245 14

-12 16 4 645.851 23.9939 13

-16 12 4 667.619 21.9216 13

-4 12 -16 652.858 21.7770 22

4 16 -12 664.681 24.7427 23

-12 -4 -16 638.694 23.4894 22

-4 16 -12 676.311 23.6896 23

-4 16 -12 653.856 22.4505 22

-12 4 -16 663.114 25.1480 22

4 12 -16 649.253 25.4436 20

4 16 -12 659.735 23.5199 20

-4 12 -16 633.338 23.8043 20

-16 12 4 664.312 25.2346 21

12 16 4 712.176 26.2600 19

16 12 -4 624.459 25.3551 19

16 12 4 613.051 21.7441 16

12 16 4 663.226 25.4472 16

16 4 -12 618.181 25.1389 18

16 12 -4 659.713 26.2686 18

-4 12 -16 604.846 23.3383 15

4 12 -16 609.611 20.4767 15

-12 -6 -16 20.5555 5.29916 8

-6 16 12 22.9118 4.41527 9

-12 16 6 20.4954 4.70511 9

-16 6 12 25.2751 5.57529 10

-16 -6 -12 23.2018 5.46064 8

-16 -6 -12 13.0414 4.43834 7

-12 -6 -16 23.6593 5.47863 7

-12 6 16 19.7000 4.76605 30

-6 16 12 12.5275 4.15722 30

-6 12 16 22.3805 5.03435 30

16 6 -12 15.7962 4.19744 27

6 16 12 17.2533 4.33571 26

-12 16 6 24.1701 5.31816 13

16 12 -6 16.2622 4.93112 19

-6 16 -12 18.9414 4.69075 22

-12 16 -6 16.6205 4.63050 22

6 12 -16 21.8972 5.12491 20

12 16 -6 16.3548 4.95906 19

-12 16 6 17.2774 4.75902 21

-16 12 6 16.9733 4.80868 21

-6 12 -16 20.0256 4.59782 15

12 16 6 19.0221 4.76990 16

16 6 -12 25.7861 5.65563 18

16 12 -6 20.3048 5.35696 18

6 16 -12 20.5587 5.14344 23

-12 6 -16 20.1915 4.97729 22

16 0 -14-0.70615 2.73249 12

14 0 -16 0.71115 2.97233 12

-17 -1 1 147.586 14.2571 10

-17 -1 -1 144.524 14.2382 10

-17 1 1 110.574 13.6372 10

-17 1 -1 112.161 13.4966 10

-17 -1 1 144.969 15.5607 6

-17 -1 -1 122.074 13.9318 6

-1 17 -1 132.325 14.2305 30

1 17 -1 111.170 13.1751 30

1 17 1 127.232 13.9593 30

-1 17 1 107.475 13.2448 30

1 -1 17 141.107 14.5451 25

-1 -1 17 123.175 13.7121 25

-17 -1 -1 95.2685 12.0340 14

-1 1 -17 115.991 11.9487 22

1 17 -1 118.652 11.4098 23

-1 17 -1 110.260 11.3734 23

-1 17 1 103.398 10.1955 23

1 17 -1 117.705 12.1739 19

1 17 1 137.747 13.4151 19

-1 1 -17 136.853 12.5184 15

-1 -1 -17 101.187 10.1850 15

1 1 -17 111.935 11.9676 15

-17 -1 1 137.562 13.6919 14

-17 1 -1 122.872 13.6470 14

1 17 -1 124.731 11.9886 16

-17 1 1 130.545 13.9215 14

1 17 1 128.213 11.5610 16

-17 1 3 531.489 28.1139 10

-17 -1 3 520.299 26.0551 10

-17 3 1 530.238 28.7293 10

-17 3 -1 542.217 29.0871 10

-17 -3 1 532.499 24.6899 10

-17 1 -3 516.136 28.0647 10

-17 -3 -1 593.760 26.3323 10

-17 -1 -3 500.177 26.4764 10

-17 -1 3 577.385 29.9368 6

-17 -3 1 530.116 28.0289 6

-17 3 1 518.021 27.9710 6

-17 -3 -1 509.610 27.7957 6

-17 3 -1 517.164 28.0555 6

-17 -1 -3 551.078 29.2960 6

1 17 -3 511.330 27.5617 30

3 17 -1 572.606 27.9114 30

3 17 1 554.872 27.1921 30

-3 17 -1 611.113 29.1696 30

1 17 3 539.587 27.2949 30

-1 17 3 534.228 27.7945 30

3 -1 17 551.279 28.5302 25

1 -3 17 531.384 27.2460 25

1 3 17 586.184 29.0627 25

-1 -3 17 579.235 28.5521 25

-1 3 17 543.087 28.2931 25

-3 -1 17 508.255 27.3897 25

1 17 3 498.873 25.9662 26

3 17 1 539.046 25.4184 26

17 -1 -3 527.210 29.1200 12

3 -1 -17 556.459 29.0252 12

-3 1 -17 569.330 26.9340 22

3 17 -1 542.639 23.0712 23

1 17 -3 511.057 24.8843 23

-1 17 -3 543.153 26.0698 23

-1 3 -17 551.191 24.0939 22

-3 17 -1 547.622 25.1293 23

-3 17 1 545.325 22.9542 23

3 17 -1 605.337 27.7799 19

3 17 1 606.615 28.9741 19

1 17 -3 477.278 22.0834 19

1 17 3 544.100 27.8033 19

1 3 -17 543.500 26.1596 15

-17 -3 -1 537.626 26.7221 14

-17 -1 -3 536.595 27.6435 14

-17 -3 1 522.664 25.3148 14

-17 -1 3 517.455 25.2253 14

-3 -1 -17 511.437 21.4016 15

-3 1 -17 531.920 23.4212 15

3 17 -1 514.840 25.4648 16

-1 3 -17 589.257 26.5986 15

3 17 1 524.900 25.2698 16

1 17 3 495.118 21.9000 16

-3 17 3 94.4391 9.64680 9

-17 3 3 114.083 13.6073 10

-17 -3 3 118.919 11.6948 10

-17 -3 -3 110.698 11.9070 10

-17 3 -3 102.446 13.3058 10

-17 -3 3 99.5981 12.5225 6

-17 3 3 75.3768 11.8929 6

-17 -3 -3 109.504 13.2027 6

-17 3 -3 100.833 12.8452 6

3 17 3 113.595 11.8873 30

-3 17 -3 111.199 12.5947 30

-3 17 3 111.541 12.9100 30

3 3 17 129.509 14.1308 25

-3 3 17 112.437 12.6023 25

3 3 -17 99.9485 9.39323 27

-3 -3 17 102.389 12.6462 25

3 17 3 103.308 11.9911 26

3 -3 17 100.328 12.2375 25

-17 3 -3 94.7694 11.9438 14

17 3 -3 96.8145 12.4750 12

17 -3 -3 113.844 14.4369 12

3 -3 -17 108.242 12.7590 12

3 3 -17 112.344 13.2630 12

3 17 -3 93.8994 11.2458 23

-3 17 -3 109.391 12.0493 23

-3 3 -17 108.814 12.1507 22

3 17 -3 101.999 11.4523 19

3 17 3 93.4524 12.4850 19

3 17 3 84.2906 10.6392 16

-17 -3 -3 105.662 12.5739 14

-17 -3 3 97.7877 10.6543 14

-3 3 -17 94.2789 11.0688 15

-5 17 1 500.077 23.3010 9

-17 1 5 553.929 28.0059 10

-17 -1 5 496.060 24.9875 10

-17 1 -5 555.439 26.1838 8

-17 1 -5 559.108 28.7337 10

-17 -1 -5 542.898 27.2956 10

-17 -1 5 501.054 28.0843 6

-17 -5 1 491.115 25.4861 6

-17 5 1 492.278 25.8735 6

-17 -5 -1 458.551 24.8189 6

-17 5 -1 549.096 27.0852 6

-17 -1 -5 581.676 29.5782 6

5 1 -17 488.214 20.4726 27

-1 5 17 516.579 22.0841 29

5 17 1 516.767 24.5188 30

-5 17 -1 541.138 26.7105 30

-5 17 1 568.035 27.5561 30

1 17 5 530.470 25.9832 30

-1 17 5 507.043 26.5067 30

1 17 5 475.910 22.1632 29

-1 17 5 531.533 24.5351 29

1 -5 17 548.788 26.3072 25

1 5 17 513.175 25.6230 25

-1 -5 17 543.657 26.5911 25

-1 5 17 537.351 26.2299 25

-5 -1 17 504.810 27.1202 25

5 17 1 519.420 23.2497 26

-1 17 5 501.568 25.8069 26

5 -1 17 481.814 26.5754 25

17 -1 -5 504.696 28.1474 12

5 -1 -17 528.763 28.0207 12

5 17 -1 518.230 21.3496 23

1 17 -5 496.028 25.1536 23

-5 1 -17 534.264 27.0032 22

-1 17 -5 482.420 25.2525 23

-5 17 -1 557.893 25.3043 23

-5 17 1 497.048 22.3907 23

-1 5 -17 529.470 22.5689 22

5 17 -1 453.302 25.2193 19

-5 17 1 478.040 24.7502 21

-5 17 -1 517.411 23.7404 21

1 17 -5 517.998 23.0828 20

5 17 1 500.173 27.4808 19

5 17 1 492.632 25.5861 16

1 5 -17 519.035 25.9539 15

-17 1 -5 488.076 25.7679 14

17 5 -1 513.223 23.1384 18

-17 -5 -1 506.180 24.7913 14

-5 1 -17 546.657 22.2771 15

-17 -5 1 449.418 22.5090 14

-1 5 -17 521.932 25.6405 15

5 17 -1 489.016 25.7134 16

-3 17 5 80.9253 8.75295 9

-17 3 -5 91.0156 9.98998 8

-5 17 3 77.2775 9.77793 9

-17 -3 -5 100.656 11.0533 10

-17 -5 -3 102.745 10.4461 10

-17 3 5 96.6949 12.0969 10

-17 5 3 104.177 13.0031 10

-17 -3 5 83.9366 9.86062 10

-17 3 -5 97.1481 12.3666 10

-17 -5 -3 100.947 11.7552 6

-17 5 -3 82.5256 10.9586 6

-17 -3 -5 91.2622 11.4612 6

-17 3 -5 83.0368 11.5907 6

-17 -3 5 108.393 12.7115 6

-17 3 5 84.7330 12.2507 6

-17 -5 3 97.8507 11.8867 6

-17 5 3 83.0304 11.0243 6

3 17 5 87.0491 8.81499 29

-5 17 -3 93.0009 11.2560 30

5 17 3 86.6470 10.0931 30

3 17 5 90.0657 10.5616 30

-5 17 3 90.4508 11.3278 30

-3 17 5 95.5528 11.9656 30

3 -5 17 76.9424 10.7508 25

3 5 17 87.3911 10.9795 25

3 5 -17 96.4367 9.69298 27

5 3 -17 80.4794 9.26902 27

-3 -5 17 92.1284 12.2152 25

-3 5 17 90.4917 11.5386 25

-5 3 17 85.3973 11.9057 25

-5 -3 17 85.5328 11.1786 25

5 17 3 104.445 11.1963 26

5 -3 17 74.2571 10.7564 25

5 3 17 106.253 12.4199 25

3 17 5 90.5300 10.8475 26

17 -3 -5 88.0653 12.1009 12

17 5 -3 78.5285 11.4355 12

17 -5 -3 87.9238 12.0717 12

-17 -5 3 79.9090 8.83337 14

-17 3 -5 94.0210 11.5219 14

-17 -5 -3 94.5189 11.5275 14

-17 -3 -5 95.1256 11.7906 14

-5 17 3 96.8342 11.9601 13

5 -3 -17 93.9901 12.1498 12

5 3 -17 85.6270 11.7717 12

17 3 -5 89.9637 11.9005 12

3 17 -5 70.6898 9.87323 23

-3 17 -5 77.6217 10.8289 23

5 17 -3 100.474 10.2853 23

-5 3 -17 107.862 12.2743 22

-5 17 -3 103.878 11.7041 23

-3 5 -17 111.400 11.7498 22

5 17 3 110.456 13.3245 19

3 17 -5 75.2166 9.01272 19

-3 17 -5 68.6150 10.5933 22

-3 5 -17 76.1901 8.44888 20

3 17 5 106.195 13.2077 19

5 17 -3 97.1897 12.1373 19

5 17 -3 78.4180 11.3574 16

3 5 -17 107.643 12.0174 15

5 17 3 103.125 11.5005 16

3 17 5 90.2391 10.2966 16

17 5 -3 98.9334 10.5028 18

17 3 -5 81.0905 10.0885 18

-5 3 -17 71.5507 9.03554 15

-3 5 -17 97.4310 11.3232 15

-5 17 5 115.586 10.5726 9

-17 5 5 121.166 13.4794 10

-17 5 -5 145.942 14.4370 10

-17 5 -5 95.8343 11.5907 6

-17 -5 5 113.522 12.2045 6

-17 5 5 101.339 11.8563 6

-17 -5 -5 106.058 11.6707 6

5 17 5 99.7739 9.94715 30

5 -5 17 130.317 12.5693 25

-5 -5 17 109.324 12.2423 25

5 5 -17 94.3206 10.0889 27

5 17 5 101.552 11.0627 26

-5 5 17 81.2713 10.9533 25

5 5 17 96.5968 11.3247 25

-17 -5 -5 117.174 12.3054 14

-5 17 5 76.9650 11.0699 13

5 -5 -17 93.9398 11.0435 12

5 5 -17 94.6805 11.9619 12

17 5 -5 85.2701 11.2604 12

17 -5 -5 104.147 12.2643 12

-5 17 -5 98.3394 11.3570 23

5 17 -5 108.392 11.2436 23

-5 5 -17 121.664 12.7123 22

-5 17 -5 105.879 12.0764 22

5 17 -5 91.5588 10.5981 19

5 17 5 115.476 11.6659 16

17 5 -5 92.1921 11.1626 18

-5 5 -17 98.2273 10.5141 15

-17 5 -5 120.190 11.8872 14

-17 -1 -7 73.7792 11.0296 8

-17 1 -7 76.7859 10.2314 8

-7 17 1 76.7489 9.75236 9

-7 -1 -17 97.1029 12.4282 8

-17 1 7 73.4822 10.1849 10

-17 -1 7 80.3209 10.1922 10

-17 7 1 92.2334 11.5794 10

-17 7 -1 81.3287 11.2394 10

-17 1 -7 97.4148 11.9755 10

-17 -1 -7 78.9784 10.5419 10

-17 7 -1 66.7908 9.32693 6

-17 -1 -7 81.7684 11.1007 6

-17 -7 1 69.3140 9.17458 6

-17 7 1 82.3957 9.94288 6

-17 -7 -1 64.1895 9.06128 6

7 17 1 56.9421 9.40596 28

-1 7 17 61.4132 8.37751 30

-1 7 17 69.3092 9.13405 29

-7 17 -1 80.6873 10.4252 30

-7 17 1 80.1280 10.3800 30

1 17 7 69.7049 10.1701 30

-1 17 7 91.7018 11.4707 30

1 17 7 91.2470 10.0403 29

-1 17 7 86.0235 10.1973 29

1 -7 17 77.7174 9.87912 25

1 7 17 79.1882 9.70118 25

7 1 -17 69.3421 8.58991 27

-1 -7 17 95.9315 10.5272 25

-1 7 17 74.6725 9.45594 25

-7 -1 17 70.7523 10.9039 25

1 17 7 85.4535 10.8536 26

7 17 1 66.9741 8.02697 26

-1 17 7 56.0323 9.19477 26

17 7 -1 67.8208 9.51554 12

17 -7 -1 88.5939 10.9189 12

-17 1 -7 78.0348 10.4940 14

-17 -7 -1 71.7482 8.78416 14

-17 -1 -7 84.7732 11.0037 14

17 -1 -7 87.2216 12.2376 12

7 -1 -17 81.7346 11.0240 12

1 17 -7 76.3065 10.6803 23

-1 17 -7 78.5607 10.6466 23

-7 -1 -17 69.5206 10.2895 22

-7 17 -1 77.8289 9.68561 23

-7 17 1 68.5339 8.64450 23

-7 1 -17 72.3314 10.7343 22

7 17 -1 78.8106 11.2340 19

-17 7 1 65.3062 10.0681 21

7 17 1 83.2339 12.1443 19

-1 7 -17 70.1617 9.88340 20

-7 17 1 82.6605 10.7027 21

1 17 -7 83.5030 9.81474 20

-7 17 -1 72.2231 9.29922 21

-1 17 -7 73.5816 10.1038 20

1 7 -17 69.6962 10.0809 15

7 17 -1 71.1517 10.4399 16

7 17 1 82.5169 10.6333 16

17 7 -1 84.5636 10.0310 18

-17 -7 1 73.0742 8.17742 14

17 7 1 68.3304 9.13561 18

-1 7 -17 57.9763 9.37927 15

-3 17 7 383.741 17.4612 9

-7 -3 -17 419.259 23.8587 8

-7 17 3 380.571 20.1820 9

-17 3 7 337.077 21.5075 10

-17 7 3 394.783 23.0241 10

-17 7 -3 363.922 21.4540 10

-17 -3 -7 372.382 22.5863 8

-17 3 -7 378.803 18.5509 8

-17 -3 7 346.300 21.7236 6

-17 3 7 373.945 22.9058 6

-17 -7 3 345.098 18.6758 6

-17 7 3 348.242 19.0342 6

-17 -7 -3 422.019 20.2472 6

-17 7 -3 350.454 19.2104 6

-17 -3 -7 386.241 22.1914 6

-17 3 -7 401.137 22.6006 6

-7 17 -3 380.431 19.3557 30

-3 7 17 364.024 17.1989 29

3 17 7 379.303 19.0041 30

7 3 -17 350.414 18.4376 27

-7 17 3 368.432 20.9331 30

-3 17 7 388.903 21.8101 30

3 17 7 334.912 17.3882 29

3 -7 17 409.250 19.8056 25

3 7 17 378.055 19.3090 25

-3 7 17 339.399 18.5550 25

-3 -7 17 390.157 19.7507 25

-7 3 17 373.621 21.7713 25

-7 -3 17 380.522 21.8623 25

7 17 3 357.876 18.1566 26

7 -3 17 416.427 22.6759 25

7 3 17 387.819 21.9611 25

17 3 -7 350.884 21.6464 12

17 -3 -7 412.927 23.4739 12

17 7 -3 328.756 18.9491 12

17 -7 -3 376.620 20.1539 12

-17 7 3 387.601 17.4929 13

7 -3 -17 377.366 21.9429 12

7 3 -17 392.508 22.7064 12

7 17 -3 354.852 17.6673 23

3 17 -7 358.350 20.5400 23

-3 17 -7 390.466 21.7173 23

-7 3 -17 396.290 22.3463 22

-7 17 -3 340.464 19.8457 23

-3 7 -17 375.216 19.1032 22

-3 17 -7 398.437 20.8872 22

-3 7 -17 348.894 18.2406 20

7 17 -3 422.613 22.9835 19

3 17 -7 369.640 17.8699 20

-7 17 3 373.595 21.7409 21

-7 17 -3 333.564 16.5692 21

-17 7 3 391.893 21.5888 21

7 17 3 421.033 22.4137 16

3 17 7 359.708 17.9691 16

17 3 -7 398.411 20.4856 18

-17 3 -7 351.291 19.6546 14

17 7 -3 374.886 20.5114 18

-7 3 -17 402.901 18.5678 15

-17 -7 -3 369.989 20.0595 14

-3 7 -17 373.481 20.8365 15

7 17 -3 389.255 22.0334 16

-5 17 7 308.359 16.4338 9

-7 17 5 337.837 18.0927 9

-7 -5 -17 348.362 20.3777 8

-17 5 7 312.601 20.0315 10

-17 7 5 333.962 20.4524 10

-17 7 -5 285.320 18.4621 10

-17 5 -7 325.716 19.9245 10

-17 -5 7 300.277 18.4420 6

-17 5 7 292.892 18.5342 6

-17 -7 5 278.228 16.3311 6

-17 7 5 314.324 17.3167 6

-17 -7 -5 305.001 16.6397 6

-17 7 -5 305.588 16.9431 6

-17 -5 -7 320.464 18.6266 6

-17 5 -7 309.491 18.6079 6

-7 17 5 328.726 19.0973 30

-5 17 7 336.973 20.1054 30

5 -7 17 334.330 17.1409 25

5 7 17 316.994 16.8508 25

7 5 -17 293.483 17.0457 27

5 7 -17 296.968 17.2703 27

-5 7 17 312.637 16.9441 25

-5 -7 17 305.307 16.7682 25

-7 5 17 331.320 18.7557 25

-7 -5 17 293.874 17.9779 25

5 17 7 305.748 18.3888 26

7 17 5 309.694 17.0519 26

-17 5 -7 283.374 14.1616 24

7 -5 17 265.236 16.9515 25

7 5 17 295.645 17.5939 25

-17 -7 -5 318.393 18.6038 14

-17 -5 -7 327.009 19.3671 14

-5 17 7 330.136 19.5374 13

17 5 -7 266.739 17.6231 12

17 -5 -7 272.023 17.7598 12

-7 17 5 315.180 19.2634 13

17 7 -5 281.631 16.5146 12

17 -7 -5 294.052 17.0369 12

-17 7 5 316.958 16.8142 13

7 -5 -17 273.895 17.3242 12

7 5 -17 317.171 18.9150 12

7 17 -5 326.780 17.8350 23

5 17 -7 299.117 17.9096 23

-5 17 -7 317.795 19.0646 23

-7 17 -5 311.528 18.4548 23

-7 5 -17 291.134 18.6172 22

-5 7 -17 335.950 18.7803 22

-5 17 -7 316.174 18.6679 22

-7 17 -5 340.024 19.8146 22

7 17 -5 276.639 18.0158 19

5 17 -7 271.691 15.4181 19

-17 7 5 336.162 18.5070 21

7 17 5 290.230 19.5367 19

5 7 -17 299.568 17.9041 15

7 17 5 342.044 19.1693 16

17 5 -7 308.579 18.5247 18

17 7 -5 337.834 19.5978 18

-7 5 -17 337.069 17.5726 15

-5 7 -17 327.159 18.5162 15

-17 -7 -7 74.9936 10.1939 8

-7 17 7 59.9572 7.58119 9

-17 7 -7 67.5323 8.98907 10

-17 -7 -7 69.1642 7.98069 6

-17 7 -7 59.9039 7.74761 6

-17 -7 7 54.7237 7.48148 6

-17 7 7 49.5426 7.13908 6

17 7 -7 57.4226 6.91721 28

17 7 7 57.6410 6.67135 28

-7 17 7 55.2723 8.31674 30

-7 -7 17 51.4878 7.24795 25

7 7 -17 55.0044 7.83285 27

7 17 7 57.9994 7.96442 26

7 -7 17 48.0260 6.73540 25

7 7 17 39.1995 6.35738 25

-7 7 17 71.0977 8.37110 25

-17 -7 -7 73.9012 9.12431 14

17 -7 -7 60.5551 7.79408 12

17 7 -7 51.3999 7.34802 12

-7 17 7 74.0716 9.39575 13

-17 7 7 84.0252 9.15497 13

-17 7 -7 51.1873 6.20814 24

-7 7 -17 65.6454 8.67086 22

7 17 -7 57.5657 8.14895 23

-7 17 -7 77.6691 9.33434 22

-7 17 7 65.4710 9.49937 21

7 17 -7 62.1366 7.95963 19

-7 7 -17 85.5737 9.19979 15

7 7 -17 57.8658 7.90876 15

17 7 -7 55.8971 8.82710 18

-17 9 1 96.3236 10.6781 10

-9 -1 -17 90.6468 11.6124 8

-17 -1 -9 70.7572 10.2418 8

-9 1 -17 70.4185 10.7221 8

-17 1 -9 77.5680 9.74315 8

-17 1 9 60.9426 9.34768 10

-17 -1 9 71.2166 9.18025 10

-17 9 -1 93.0098 10.7907 10

-17 -1 -9 87.3292 11.0960 6

-17 -1 -9 77.9559 8.56705 7

17 9 1 93.6747 10.3896 28

-1 9 17 57.9428 7.21713 30

1 9 17 95.6259 10.3692 29

-1 9 17 90.2912 9.48501 29

1 17 9 92.3120 9.55715 30

-9 17 -1 83.6836 8.66533 30

-9 17 1 74.6510 8.77157 30

9 17 1 79.8542 9.92580 28

-1 17 9 87.6714 9.87035 30

1 17 9 75.8021 9.25279 29

-1 17 9 87.3442 10.1479 29

1 17 9 83.1546 9.71368 26

-1 17 9 75.4978 9.65144 26

-9 -1 17 77.1595 10.0628 25

-17 1 -9 76.4768 9.26829 14

-17 -1 -9 60.0549 8.72284 14

17 -1 -9 77.2390 10.8702 12

9 -1 -17 90.5430 10.6794 12

-9 17 -1 79.4843 9.20014 23

1 17 -9 85.3848 9.83190 23

-9 1 -17 79.9482 10.6445 22

9 17 -1 82.6718 10.8085 19

-17 9 1 98.9002 11.0132 21

17 9 -1 72.8777 8.75431 19

1 9 -17 67.0911 9.77503 20

-1 9 -17 72.2076 9.74115 20

1 17 -9 69.1595 9.21105 20

-1 17 -9 80.9612 10.1165 20

-9 17 1 73.1363 9.68323 21

-9 17 -1 82.5369 9.34161 21

-17 -9 -1 90.1229 8.43391 14

17 1 -9 78.2236 8.78291 18

17 9 -1 71.3168 9.37955 18

1 9 -17 78.7534 9.80285 15

-3 17 9 286.417 14.0291 9

-9 -3 -17 320.353 19.8410 8

-9 17 3 307.717 17.5892 9

-17 3 9 294.530 18.5847 10

-17 9 3 329.268 18.8121 10

-17 9 -3 326.816 17.8744 10

-17 -3 -9 319.495 19.8177 8

-17 3 -9 283.919 15.1360 8

-17 -3 -9 317.323 18.7528 6

-17 3 -9 301.896 18.6690 6

17 9 -3 307.820 17.3796 28

17 9 3 322.128 17.5139 28

3 9 17 350.426 18.7435 29

-9 17 3 308.553 16.6731 30

-3 9 17 307.028 15.6209 29

-3 17 9 309.066 18.2175 30

3 17 9 296.892 16.1685 29

9 3 -17 293.519 16.1171 27

-3 9 17 292.776 16.3449 30

-3 17 9 305.233 17.9042 29

9 17 -3 286.468 17.4055 28

9 17 3 323.303 17.9612 28

-9 3 17 305.633 18.1800 25

-9 -3 17 284.064 17.8254 25

3 17 9 300.768 17.6097 26

9 17 3 302.061 14.2387 26

-17 -3 -9 316.479 17.9571 14

17 -3 -9 284.439 18.1719 12

17 3 -9 279.369 18.0570 12

-9 17 3 332.635 18.8283 13

-17 9 3 298.825 14.3104 13

9 -3 -17 291.993 18.0741 12

9 3 -17 298.284 18.8876 12

-3 9 -17 319.798 15.7241 22

3 17 -9 331.615 18.5410 23

-9 3 -17 316.430 19.1389 22

-9 17 -3 299.044 17.2660 23

-3 17 -9 281.397 16.1314 22

-3 9 -17 323.866 17.0437 20

9 17 -3 277.904 18.5239 19

3 17 -9 298.114 16.1114 20

-9 17 3 305.215 18.3939 21

9 17 3 329.022 19.9269 19

-17 9 3 294.183 17.9484 21

17 9 -3 304.456 17.3965 19

9 17 3 316.186 18.6706 16

-17 -9 -3 296.533 15.9177 14

-17 3 -9 277.199 15.2462 14

17 3 -9 289.404 17.1922 18

17 9 -3 290.768 17.9782 18

-9 3 -17 281.944 14.1181 15

-3 9 -17 320.381 18.0466 15

3 9 -17 299.437 16.9847 15

-5 17 9 320.243 15.4704 9

-9 -5 -17 391.316 20.2995 8

-9 17 5 324.659 17.2338 9

-17 5 9 327.840 19.0049 10

-17 9 5 335.660 18.5732 10

-17 9 -5 311.087 16.7437 10

-17 -5 9 327.489 17.9120 6

-17 5 9 308.903 17.4187 6

-17 -5 -9 319.508 17.1487 6

-17 5 -9 330.145 17.5708 6

17 9 -5 337.410 16.6594 28

17 9 5 338.371 16.4685 28

-9 17 5 325.053 16.7805 30

-5 17 9 301.524 17.5554 30

5 17 9 286.073 14.1768 29

-5 9 17 366.174 18.0687 30

9 5 -17 357.551 17.3206 27

5 9 17 317.197 14.3216 26

-9 5 17 300.301 16.8657 25

-9 -5 17 345.815 17.8495 25

9 17 5 306.192 15.0138 26

9 -5 17 355.956 17.6915 25

9 5 17 291.112 16.0039 25

-17 -9 -5 300.384 16.3679 14

17 -5 -9 334.831 17.7170 12

17 5 -9 298.011 16.8243 12

-5 17 9 326.144 17.2752 13

-17 9 5 307.374 15.3876 13

9 -5 -17 372.603 18.2915 12

9 5 -17 318.194 17.5082 12

-5 9 -17 308.155 16.2554 22

9 17 -5 325.839 16.0276 23

5 17 -9 361.637 18.5784 23

-5 17 -9 326.832 17.6402 23

-9 17 -5 339.814 17.7796 23

-9 5 -17 348.406 19.0173 22

-5 17 -9 333.299 17.6210 22

9 17 -5 327.227 18.5125 19

-5 9 -17 275.444 14.0633 20

-17 9 5 324.128 17.4398 21

9 17 5 328.693 19.2612 19

17 9 -5 316.505 17.5789 19

9 17 5 352.691 18.6749 16

17 5 -9 360.402 18.8017 18

17 9 -5 337.879 18.8525 18

-9 5 -17 305.112 15.1665 15

-5 9 -17 353.915 18.3685 15

5 9 -17 319.204 16.4444 15

-7 17 9 31.2328 5.54320 9

-17 -9 -7 51.9576 7.82175 8

-9 17 7 39.0146 6.19366 9

-17 -7 -9 48.0738 7.76543 8

-9 -7 -17 33.2771 6.06823 8

-17 9 7 45.3213 7.09297 10

-9 -7 -17 27.5322 6.57032 7

-7 9 17 34.6788 6.61180 30

-9 7 17 43.3732 6.79076 30

-9 17 7 40.1948 6.54474 30

9 7 -17 39.7277 6.30022 27

7 9 17 45.0569 5.78472 26

7 17 9 29.5388 5.65039 26

9 17 7 31.4635 5.18082 26

-7 9 -17 31.9278 5.17512 24

-17 7 -9 33.9919 5.06131 24

-7 17 -9 33.4139 6.33351 23

-9 7 -17 39.5852 6.78361 22

9 17 -7 36.7880 6.05421 23

7 17 -9 36.2224 6.21298 23

-7 9 -17 43.6606 6.74052 22

-7 17 -9 27.7240 6.12284 22

9 17 -7 32.7989 6.02048 19

-7 17 9 37.2167 6.84488 21

-9 17 7 30.4235 6.27699 21

-17 -9 -7 33.0809 6.15219 14

-17 -7 -9 37.7350 6.74330 14

-7 17 9 38.8053 6.53384 13

-9 17 7 37.6511 6.74580 13

-17 9 7 33.3667 5.62810 13

-17 7 9 41.5986 6.43084 13

7 9 -17 37.4128 5.60448 15

-9 7 -17 41.8834 6.13467 15

-7 9 -17 49.0204 6.76456 15

9 17 7 36.2942 6.50505 16

9 7 -17 36.7607 5.74062 15

17 7 -9 38.7374 7.07665 18

17 9 -7 46.2301 7.51540 18

-17 -9 -9 58.4616 6.60575 14

-9 17 9 49.0428 6.32831 13

-9 9 17 53.3016 6.48614 30

-11 1 -17 233.274 15.3165 8

-17 1 11 188.795 12.8715 10

-17 11 1 201.202 12.4369 10

-17 11 -1 229.113 12.5789 10

-17 -1 -11 214.479 14.4593 8

-17 1 -11 229.005 13.7247 8

1 11 17 245.838 14.3144 29

17 11 1 241.049 14.2195 28

1 17 11 216.106 12.0376 30

-1 11 17 208.995 13.2401 29

-1 17 11 216.135 13.1290 30

1 17 11 221.498 13.6247 29

-1 17 11 225.691 14.1221 29

11 17 1 230.404 14.4227 28

-11 -1 17 232.371 14.6887 25

1 17 11 238.411 13.6007 26

17 -1 -11 230.680 15.4669 12

11 -1 -17 219.012 14.8311 12

1 17 -11 236.770 14.5216 23

-1 17 -11 214.535 13.9517 23

-11 -1 -17 234.251 14.4669 22

-11 1 -17 204.632 13.9951 22

17 11 -1 219.664 13.0354 19

1 11 -17 239.993 14.7954 20

-1 11 -17 246.448 14.9583 20

1 17 -11 235.009 14.0615 20

-1 17 -11 243.623 14.5898 20

11 17 1 233.364 15.4938 19

-11 17 1 217.779 13.9408 21

-11 17 -1 218.538 12.9603 21

17 1 -11 208.321 12.7708 18

-17 -1 -11 202.516 12.5293 14

-17 1 -11 201.421 11.6825 14

-1 11 -17 233.442 13.6925 15

1 11 -17 212.499 12.9057 15

11 17 -1 220.325 14.4913 16

11 17 1 233.094 14.8754 16

-11 -3 -17 44.9985 7.65205 8

-17 3 11 43.3334 7.51362 10

-17 -3 -11 56.7577 7.77028 8

-17 11 3 51.8805 6.72040 10

-17 -3 -11 40.1730 6.15585 7

17 11 -3 50.4783 6.91524 28

17 11 3 50.3134 6.69155 28

3 11 17 30.9157 6.14136 29

-3 17 11 42.7234 6.65897 30

-3 11 17 40.7309 5.85919 29

11 17 -3 51.9907 7.04917 28

3 17 11 40.2816 6.02295 29

11 17 3 43.1185 6.48201 28

-3 11 17 49.7924 6.31741 30

-11 3 17 43.3992 6.85255 25

11 3 -17 45.9499 6.36484 27

-11 -3 17 34.4737 6.65706 25

3 17 11 41.9271 6.56015 26

17 -3 -11 30.1779 6.14070 12

17 3 -11 40.9657 6.91833 12

-17 -3 -11 58.5574 7.25986 14

11 -3 -17 61.5126 7.90786 12

11 3 -17 40.2387 6.90695 12

-3 17 -11 39.8851 6.38718 23

-11 -3 -17 44.3842 6.70999 22

-11 3 -17 46.2067 7.41474 22

-17 11 3 45.4736 6.95591 21

11 17 3 48.1145 7.68128 19

17 11 -3 39.7420 6.56002 19

-3 17 -11 41.8003 5.82542 22

-3 11 -17 40.3280 6.34758 20

3 17 -11 40.8384 6.06368 20

-11 17 3 40.2482 6.75555 21

11 17 -3 55.0429 7.97089 19

11 17 3 53.2079 7.28931 16

-3 11 -17 37.1604 5.91640 15

17 3 -11 39.7320 6.59677 18

17 11 -3 43.4802 7.14933 18

3 11 -17 42.5299 6.09408 15

-17 -11 -5 24.9508 5.26482 8

-11 -5 -17 26.8133 5.86389 8

-17 5 11 26.5804 5.51926 10

-17 -5 -11 29.6872 5.80988 8

-17 -5 -11 21.1822 4.97067 7

17 11 -5 29.2363 4.96984 28

5 11 17 29.1891 5.79204 29

-5 17 11 22.9598 5.16774 30

-5 11 17 26.4329 5.17278 30

11 5 -17 32.8352 5.40408 27

5 17 11 28.6500 5.00126 26

17 -5 -11 31.1132 5.50429 12

17 5 -11 18.1003 4.74206 12

-17 -5 -11 26.7649 5.12233 14

-11 17 5 30.1396 5.33970 13

11 -5 -17 32.5440 5.25442 12

11 5 -17 34.5707 5.90969 12

-5 17 -11 29.0033 5.33216 23

-11 -5 -17 29.4023 5.42306 22

-17 11 5 31.3456 5.59631 21

11 17 5 31.2809 5.90197 19

17 11 -5 15.7552 4.76596 19

5 11 -17 27.7767 5.47296 20

-5 17 11 23.5270 4.83133 21

11 17 -5 24.1488 5.36722 19

17 5 -11 42.6603 6.53008 18

17 11 -5 34.5854 6.43562 18

-18 0 0 4.44597 5.40675 6

0 18 0 2.71690 5.10856 30

0 0 18 4.16791 5.80680 25

-18 0 0 3.81629 5.68402 14

0 18 0-1.58477 3.75538 23

0 0 -18 0.86610 3.35152 22

0 0 -18 3.74657 4.27146 15

-18 0 0-1.29592 4.72793 10

-18 0 2 79.2403 10.6646 10

-18 2 0 111.999 12.8418 10

-18 -2 0 87.1835 10.7792 10

-18 0 -2 78.3304 11.0627 10

-18 0 2 76.7487 11.5041 6

-18 -2 0 66.9815 10.6480 6

-18 2 0 77.2282 11.1523 6

-18 0 -2 62.8865 10.2502 6

0 18 -2 64.3968 10.7547 30

2 18 0 73.1193 10.9984 30

0 18 2 90.5434 11.6841 30

2 0 18 73.2321 11.6310 25

0 -2 18 66.3333 10.4284 25

0 2 18 73.3432 10.8149 25

-2 0 18 82.3693 11.3516 25

-18 2 0 74.1893 10.8365 14

-18 -2 0 80.7271 10.6968 14

-18 0 -2 63.3360 10.5013 14

18 0 -2 76.6430 11.8595 12

0 18 -2 66.2990 9.04093 23

-2 18 0 74.6673 8.89538 23

-2 0 -18 105.849 11.1598 22

2 18 0 76.3702 10.5850 19

-2 0 -18 76.4047 8.67026 15

2 18 0 66.5758 9.19356 16

0 2 -18 91.1207 10.4229 15

0 -2 -18 76.2232 8.04371 15

2 0 -18 88.9304 10.1178 15

-18 2 2 483.096 25.5462 10

-18 -2 2 458.696 22.5509 10

-18 2 -2 465.156 25.4837 10

-18 -2 -2 429.110 22.5261 10

-18 -2 2 476.437 26.0634 6

-18 2 2 415.109 24.2901 6

-18 -2 -2 480.176 26.3025 6

-18 2 -2 437.374 25.1347 6

2 18 -2 412.979 23.9628 30

-2 18 -2 399.715 23.1981 30

2 18 2 456.623 24.1056 30

-2 18 2 468.738 24.9677 30

2 -2 18 439.507 23.9733 25

2 2 18 430.780 24.3469 25

-2 -2 18 446.069 24.5699 25

-2 2 18 440.039 24.4567 25

18 2 -2 502.338 27.2054 12

18 -2 -2 388.648 24.3992 12

2 18 -2 472.642 21.0915 23

-2 2 -18 481.984 22.2845 22

-2 18 -2 445.643 21.6602 23

2 18 -2 410.447 20.6564 19

2 18 2 459.960 24.1040 19

2 2 -18 453.399 22.6870 15

2 -2 -18 400.222 19.3166 15

-18 -2 2 466.698 22.6129 14

-2 2 -18 431.453 20.9938 15

-18 -2 -2 433.055 23.5690 14

2 18 2 442.264 20.3464 16

-18 0 4 2.37366 4.59252 10

-18 4 0 1.38796 5.21950 10

-18 -4 0 0.86071 3.51074 10

-18 0 -4-2.56182 5.60285 10

-18 0 -4-1.40500 4.62036 6

-18 0 4 4.29908 5.22806 6

-18 -4 0 3.77052 4.43969 6

-18 4 0 1.28718 4.69597 6

4 18 0 1.12585 4.23383 30

-4 18 0-1.25943 5.00698 30

0 18 4 1.21718 4.00269 30

0 -4 18-1.18974 6.04173 25

0 4 18-1.22582 4.74340 25

-4 0 18-2.64313 5.25402 25

4 0 18 1.34229 5.33644 25

18 0 -4 1.44804 5.75684 12

-18 -4 0 1.04880 4.16963 14

4 0 -18 4.15830 5.92970 12

0 18 -4-1.07220 4.48138 23

-4 0 -18-1.18569 4.18835 22

-4 18 0-1.74078 3.46033 23

-4 18 0 0.99159 4.14447 21

4 18 0 1.21102 5.06158 19

4 18 0 1.07577 3.53768 16

0 4 -18-1.10028 3.75486 15

-4 0 -18 0.70488 3.63680 15

-18 2 -4 40.1088 7.20533 8

-18 2 4 36.4898 8.51014 10

-18 4 2 32.8118 8.66043 10

-18 -2 4 32.2560 6.75813 10

-18 4 -2 34.1081 8.99375 10

-18 2 -4 34.9863 8.78576 10

-18 -4 -2 25.1138 6.20604 10

-18 -2 -4 32.6661 7.64339 10

-18 -2 -4 33.6156 8.60622 6

-18 2 -4 52.7799 9.58039 6

-18 -2 4 41.1795 8.78473 6

-18 2 4 30.2511 8.52768 6

-18 -4 2 47.3487 8.60155 6

-18 4 2 31.8639 8.16006 6

-18 -4 -2 29.6459 7.06203 6

-18 4 -2 37.9914 8.35118 6

4 18 2 34.0741 7.19792 30

-4 18 -2 31.3178 8.17019 30

2 18 4 37.6084 7.83826 30

-4 18 2 42.6595 8.50859 30

-2 18 4 35.0875 7.43198 30

2 -4 18 32.4297 7.71442 25

2 4 18 44.3477 9.10107 25

-2 -4 18 49.5867 8.76923 25

-2 4 18 39.8653 8.41317 25

-4 2 18 29.5785 7.97846 25

-4 -2 18 35.4283 8.42350 25

2 18 4 46.3795 8.21172 26

4 -2 18 40.5572 8.74850 25

4 2 18 31.0320 8.10774 25

18 2 -4 50.2183 9.95549 12

18 -2 -4 27.7678 8.61001 12

18 4 -2 26.3738 7.91026 12

-18 -4 2 33.5519 6.54069 14

18 -4 -2 35.4984 8.75108 12

-18 2 -4 48.1811 9.14598 14

-18 -4 -2 33.9407 7.53674 14

-18 -2 -4 36.8398 8.02158 14

4 18 -2 35.7233 6.50456 23

2 18 -4 30.4335 7.13292 23

-2 18 -4 29.4508 7.53558 23

-2 4 -18 39.0986 6.99837 22

-4 18 -2 30.3143 6.79976 23

-4 2 -18 28.2692 7.46190 22

4 18 2 30.8882 7.63160 19

-2 4 -18 27.6862 5.50087 20

4 18 -2 22.6472 6.69882 19

-4 18 -2 35.9167 6.01044 21

4 18 2 30.1792 6.89294 16

2 18 4 28.9751 5.86075 16

2 4 -18 29.1001 7.02475 15

-4 2 -18 35.2639 6.63793 15

-2 4 -18 37.3811 7.77583 15

-4 18 4 0.73597 3.42272 9

-18 4 4 1.30847 4.62208 10

-18 -4 -4-4.47312 3.82718 10

-18 -4 -4-1.17207 4.78075 6

-18 4 -4 1.20320 4.65587 6

-18 -4 4-1.19357 4.74515 6

-18 4 4 1.21403 4.42911 6

4 18 4 2.70792 3.77269 30

4 -4 18-2.20302 4.60389 25

4 4 18 1.13420 4.00647 25

4 4 -18-1.38516 3.34254 27

-4 4 18 4.58797 4.79399 25

-4 -4 18 1.12621 3.84336 25

4 18 4-1.01966 4.74207 26

-18 -4 -4-1.14470 3.90644 14

18 4 -4 2.45586 5.59978 12

18 -4 -4 1.23286 5.15289 12

4 18 -4-0.91606 3.82879 23

-4 4 -18-2.04156 4.65509 22

-4 18 -4-1.06358 4.44535 23

4 18 -4 0.88684 3.61734 19

4 18 4-1.29873 5.16324 19

4 18 4-0.90393 3.77809 16

4 4 -18 1.08770 4.09035 15

-4 4 -18 2.81383 4.27733 15

-18 0 -6 11.7143 5.49887 8

-18 0 6 8.48658 4.74505 10

-18 6 0 13.8286 6.07124 10

-18 0 -6 9.60484 5.36904 10

-18 0 -6 6.46610 5.14603 6

-18 0 6 25.3213 7.09099 6

-18 -6 0 12.9057 5.04611 6

-18 6 0 18.6993 6.28884 6

0 6 18 7.05034 4.11029 29

-6 18 0 9.68323 5.00852 30

0 18 6 8.67204 5.50914 30

0 -6 18 12.6868 5.11789 25

0 6 18 11.7829 5.45196 25

-6 0 18 15.8883 6.30956 25

6 0 18 16.4542 6.53402 25

-18 -6 0 11.0690 5.03767 14

-18 0 -6 12.4146 5.45129 14

18 6 0 16.0180 6.00793 12

18 -6 0 10.0289 6.18602 12

6 0 -18 10.3279 6.66441 12

18 0 -6 25.1318 7.63320 12

0 18 -6 19.4492 6.46607 23

-6 18 0 15.3046 5.03055 23

-6 0 -18 19.1864 6.74564 22

0 6 -18 18.6508 5.58168 20

6 18 0 14.5810 6.07405 19

-6 18 0 14.1470 5.37643 21

0 6 -18 6.46274 4.50732 15

6 18 0 5.55089 5.45721 16

-18 2 6 407.672 22.2938 10

-18 -2 6 388.944 18.5591 10

-18 6 -2 391.369 21.8418 10

-18 -2 -6 392.283 22.0041 8

-18 2 -6 380.414 22.1078 10

-18 -2 -6 442.310 21.6801 10

-18 2 -6 373.018 18.4749 8

-18 -2 6 359.695 21.7665 6

-18 2 6 370.498 22.0461 6

-18 -6 2 403.025 20.2083 6

-18 6 2 378.196 20.1196 6

-18 -6 -2 400.231 20.0028 6
[truncated: 24,845 more chars]
