# Supplementary material
Source: Research Square preprint supplement (doi:10.21203/rs.3.rs-9931357/v1)
Supplement: Supplementary file 3 [file d0ef39e03dd854f1ddbc6f96.docx]

**checkCIF/PLATON report**

Structure factors have been supplied for datablock(s) shelx

THIS REPORT IS FOR GUIDANCE ONLY. IF USED AS PART OF A REVIEW PROCEDURE FOR

PUBLICATION, IT SHOULD NOT REPLACE THE EXPERTISE OF AN EXPERIENCED

CRYSTALLOGRAPHIC REFEREE.

No syntax errors found. CIF dictionary Interpreting this report

**Datablock: shelx**

Bond precision: = 0.0000 A Wavelength=0.71073

Cell: a=8.34222(6) b=8.34222(6) c=8.34222(6)

alpha=90 beta=90 gamma=90

Temperature: 293 K

Calculated Reported

Volume 580.557(13) 580.556(13)

Space group F d -3 m F d -3 m

Hall group -F 4vw 2vw -F 4vw 2vw

Moiety formula

Al0.09 Ca0.09 Cr7.36

Fe10.43 Mg0.27 Mn0.18

Ni0.28 O32 Si0.64 Ti

?

Sum formula

Al0.09 Ca0.09 Cr7.36

Fe10.43 Mg0.27 Mn0.18

Ni0.28 O32 Si0.64 Ti

Al0.01 Ca0.01 Cr0.92 Fe1.31

Mg0.03 Mn0.02 Ni0.03 O4

Si0.08 Ti0.

Mr 1545.79 193.12

Dx,g cm-3 4.421 4.419

Z 1 8

Mu (mm-1) 10.210 10.188

F000 736.7 736.0

F000’ 743.27

h,k,lmax 21,21,21

Nref 279

Tmin,Tmax 0.583,0.659 0.665,0.782

Tmin’ 0.543

Correction method= # Reported T Limits: Tmin=0.665 Tmax=0.782

AbsCorr = GAUSSIAN

Data completeness= Theta(max)= 64.912

R(reflections)= 0.0214( 269)

wR2(reflections)=

0.0577( 279)

S = 1.149 Npar= 10

The following ALERTS were generated. Each ALERT has the format

**test-name_ALERT_alert-type_alert-level**.

Click on the hyperlinks for more details of the test.

**Alert level C**

PLAT041_ALERT_1_C Calc. and Reported SumFormula Strings Differ Please Check

Calc: Al0.01 Ca0.01 Cr0.92 Fe1.30 Mg0.03 Mn0.02 Ni0.03 O4 Si0.08 T

Rep.: Al0.01 Ca0.01 Cr0.92 Fe1.31 Mg0.03 Mn0.02 Ni0.

03 O4 Si0.08 Ti0.02 Zn0.01

PLAT077_ALERT_4_C Unitcell Contains Non-integer Number of Atoms .. Please Check

PLAT971_ALERT_2_C Check Calcd Resid. Dens. 1.81Ang From Zn1 2.01 eA-3

PLAT972_ALERT_2_C Check Calcd Resid. Dens. 1.63Ang From O -2.17 eA-3

PLAT973_ALERT_2_C Check Calcd Positive Resid. Density on Ni2 1.37 eA-3

PLAT973_ALERT_2_C Check Calcd Positive Resid. Density on Fe2 1.37 eA-3

PLAT973_ALERT_2_C Check Calcd Positive Resid. Density on Cr2 1.37 eA-3

PLAT973_ALERT_2_C Check Calcd Positive Resid. Density on Ti2 1.37 eA-3

PLAT973_ALERT_2_C Check Calcd Positive Resid. Density on Ca2 1.37 eA-3

PLAT973_ALERT_2_C Check Calcd Positive Resid. Density on Al2 1.37 eA-3

**Alert level G**

CELLZ01_ALERT_1_G Difference between formula and atom_site contents detected.

CELLZ01_ALERT_1_G ALERT: check formula stoichiometry or atom site occupancies.

From the CIF: _cell_formula_units_Z 8

From the CIF: _chemical_formula_sum Al0.01 Ca0.01 Cr0.92 Fe1.31 Mg0.03

TEST: Compare cell contents of formula and atom_site data

atom Z*formula cif sites diff

Al 0.08 0.09 -0.01

Ca 0.08 0.09 -0.01

Cr 7.36 7.36 0.00

Fe 10.48 10.43 0.05

Mg 0.24 0.27 -0.03

Mn 0.16 0.18 -0.02

Ni 0.24 0.28 -0.04

O 32.00 32.00 0.00

Si 0.64 0.64 0.00

Ti 0.16 0.16 -0.00

Zn 0.08 0.06 0.02

PLAT045_ALERT_1_G Calculated and Reported Z Differ by a Factor ... 0.125 Check

PLAT068_ALERT_1_G Reported F000 Differs from Calcd (or Missing)... Please Check

PLAT168_ALERT_4_G The CIF-Embedded .res File Contains EXYZ Records 2 Report

PLAT171_ALERT_4_G The CIF-Embedded .res File Contains EADP Records 2 Report

PLAT199_ALERT_1_G Reported _cell_measurement_temperature ..... (K) 293 Check

PLAT200_ALERT_1_G Reported _diffrn_ambient_temperature ..... (K) 293 Check

PLAT300_ALERT_4_G Atom Site Occupancy of Zn1 Constrained at 0.0077 Check

PLAT300_ALERT_4_G Atom Site Occupancy of Ni2 Constrained at 0.0173 Check

PLAT300_ALERT_4_G Atom Site Occupancy of Fe1 Constrained at 0.6519 Check

PLAT300_ALERT_4_G Atom Site Occupancy of Fe2 Constrained at 0.3259 Check

PLAT300_ALERT_4_G Atom Site Occupancy of Mn1 Constrained at 0.0223 Check

PLAT300_ALERT_4_G Atom Site Occupancy of Cr2 Constrained at 0.4598 Check

PLAT300_ALERT_4_G Atom Site Occupancy of Ti2 Constrained at 0.0103 Check

PLAT300_ALERT_4_G Atom Site Occupancy of Ca2 Constrained at 0.0059 Check

PLAT300_ALERT_4_G Atom Site Occupancy of Si1 Constrained at 0.0797 Check

PLAT300_ALERT_4_G Atom Site Occupancy of Al2 Constrained at 0.0059 Check

PLAT300_ALERT_4_G Atom Site Occupancy of Mg1 Constrained at 0.0336 Check

PLAT301_ALERT_3_G Main Residue Disorder ..............(Resd 1 ) 90% Note

PLAT304_ALERT_4_G Non-Integer Number of Atoms in ..... (Resd 1 ) 19.60 Check

PLAT811_ALERT_5_G No ADDSYM Analysis: Too Many Excluded Atoms .... ! Info

PLAT883_ALERT_1_G No Info/Value for _atom_sites_solution_primary . Please Do !

PLAT965_ALERT_2_G The SHELXL WEIGHT Optimisation has not Converged Please Check

0 **ALERT level A** = Most likely a serious problem - resolve or explain

0 **ALERT level B** = A potentially serious problem, consider carefully

10 **ALERT level C** = Check. Ensure it is not caused by an omission or oversight

24 **ALERT level G** = General information/check it is not something unexpected

8 ALERT type 1 CIF construction/syntax error, inconsistent or missing data

9 ALERT type 2 Indicator that the structure model may be wrong or deficient

1 ALERT type 3 Indicator that the structure quality may be low

15 ALERT type 4 Improvement, methodology, query or suggestion

1 ALERT type 5 Informative message, check

It is advisable to attempt to resolve as many as possible of the alerts in all categories. Often the minor

alerts point to easily fixed oversights, errors and omissions in your CIF or refinement strategy, so

attention to these fine details can be worthwhile. In order to resolve some of the more serious problems

it may be necessary to carry out additional measurements or structure refinements. However, the

purpose of your study may justify the reported deviations and the more serious of these should

normally be commented upon in the discussion or experimental section of a paper or in the

"special_details" fields of the CIF. checkCIF was carefully designed to identify outliers and unusual

parameters, but every test has its limitations and alerts that are not important in a particular case may

appear. Conversely, the absence of alerts does not guarantee there are no aspects of the results needing

attention. It is up to the individual to critically assess their own results and, if necessary, seek expert

advice.

**Publication of your CIF in IUCr journals**

A basic structural check has been run on your CIF. These basic checks will be run on all CIFs

submitted for publication in IUCr journals (*Acta Crystallographica*, *Journal of Applied*

*Crystallography*, *Journal of Synchrotron Radiation*); however, if you intend to submit to *Acta*

*Crystallographica Section C* or *E* or *IUCrData*, you should make sure that full publication checks are

run on the final version of your CIF prior to submission.

**Publication of your CIF in other journals**

Please refer to the *Notes for Authors* of the relevant journal for any special instructions relating to CIF

submission.

**PLATON version of 29/11/2023; check.def file version of 14/09/2023**

Datablock shelx - ellipsoid plot
